# Supplementary material for: Genome-scale metabolic model of the fission yeast Schizosaccharomyces pombe and the reconciliation of in silico/in vivo mutant growth
Source: PubMed Central journal article supplement (PMC3390277; doi:10.1186/1752-0509-6-49), 2012-07-05
Supplement: 1752-0509-6-49-S1.pdf [file 1752-0509-6-49-S1.pdf]

**Supporting Information 1A: List of metabolic reactions used in SpoMBEL1693**

| REACTION NAME                                                                                      | COMPARTMENT           | METABOLIC REACTION                                           | SUBSYSTEM                        | Gene(s) <i>S. pombe</i>                                                                                                                                                        | EC                   |
|----------------------------------------------------------------------------------------------------|-----------------------|--------------------------------------------------------------|----------------------------------|--------------------------------------------------------------------------------------------------------------------------------------------------------------------------------|----------------------|
| alanine racemase                                                                                   | Cytosol               | ALA <-> dALA                                                 | Alanine and Aspartate Metabolism | SPBC359.02                                                                                                                                                                     | 5.1.1.1              |
| alanine aminotransferase (predicted)                                                               | Cytosol               | AKG + ALA <-> GLU + PYR                                      | Alanine and Aspartate Metabolism | SPBC582.08                                                                                                                                                                     | 2.6.1.2              |
| L-alanine transaminase                                                                             | Mitochondria          | AKG + ALA <-> GLU + PYR                                      | Alanine and Aspartate Metabolism | SPBC582.08                                                                                                                                                                     | 2.6.1.2              |
| aspartate-semialdehyde dehydrogenase                                                               | Cytosol               | 4pasp + H + NADPH -> aspSA + NADP + Pi                       | Alanine and Aspartate Metabolism | SPCC1827.06c                                                                                                                                                                   | 1.2.1.11             |
| asparagine synthase (glutamine-hydrolysing)                                                        | Cytosol               | ASP + ATP + GLN + H2O -> AMP + ASN + GLU + H + PPI           | Alanine and Aspartate Metabolism | SPBC119.10                                                                                                                                                                     | 6.3.5.4              |
| aspartate kinase (predicted)                                                                       | Cytosol               | ASP + ATP -> 4pasp + ADP                                     | Alanine and Aspartate Metabolism | SPBC19F5.04                                                                                                                                                                    | 2.7.2.4              |
| aspartate transaminase (predicted)                                                                 | Cytosol               | AKG + ASP <-> GLU + OAA                                      | Alanine and Aspartate Metabolism | SPAC10F6.13c                                                                                                                                                                   | 2.6.1.1              |
| aspartate transaminase (predicted)                                                                 | Mitochondria          | AKG + ASP <-> GLU + OAA                                      | Alanine and Aspartate Metabolism | SPBC725.01                                                                                                                                                                     | 2.6.1.1              |
| aspartate transaminase (predicted)                                                                 | Nucleus               | AKG + ASP <-> GLU + OAA                                      | Alanine and Aspartate Metabolism | SPAC10F6.13c                                                                                                                                                                   | 2.6.1.1              |
| homocysteine S-methyltransferase                                                                   | Cytosol               | SAM + HCYS -> SAH + H + MET                                  | Alanine and Aspartate Metabolism | SPAC57A7.07c                                                                                                                                                                   | 2.1.1.10             |
| 1,4-alpha-D-Glucan glucanohydrolase                                                                | Cytosol               | GLYCogen + H2O -> dext                                       | Alternate Carbon Metabolism      | SPAC23D3.14c                                                                                                                                                                   | 3.2.1.1              |
| Dextrin 6-alpha-D-glucanohydrolase                                                                 | Cytosol               | dext + H2O -> GLC                                            | Alternate Carbon Metabolism      | SPBC14C8.05c                                                                                                                                                                   | 3.2.1.3              |
| L-lactate dehydrogenase                                                                            | Cytosol               | LAC + NAD <-> PYR + NADH + H                                 | Alternate Carbon Metabolism      | SPAC186.08c                                                                                                                                                                    | 1.1.1.27             |
| L-lactate dehydrogenase (mitochondria??)                                                           | Mitochondria          | LAC + NAD <-> PYR + NADH + H                                 | Alternate Carbon Metabolism      | SPAC186.08c                                                                                                                                                                    | 1.1.1.27             |
| beta-fructofuranosidase-like protein                                                               | Cytosol               | H2O + suc -> fru + GLC                                       | Alternate Carbon Metabolism      | SPAPB24D3.10c                                                                                                                                                                  | 3.2.1.20             |
| beta-fructofuranosidase-like protein                                                               | Extracellular         | H2O + suc -> fru + GLC                                       | Alternate Carbon Metabolism      | SPAPB24D3.10c                                                                                                                                                                  | 3.2.1.20             |
| glucan 1,4-alpha-glucosidase                                                                       | Golgi apparatus       | GLYCogen + H2O -> GLC                                        | Alternate Carbon Metabolism      | SPBC14C8.05c                                                                                                                                                                   | 3.2.1.3              |
| glucan 1,4-alpha-glucosidase, vacuole                                                              | Endoplasmic Reticulum | GLYCogen + H2O -> GLC                                        | Alternate Carbon Metabolism      | SPBC14C8.05c                                                                                                                                                                   | 3.2.1.3              |
| lactoylglutathione lyase                                                                           | Nucleus               | GTHrd + mtHgxl -> lgt-S                                      | Alternate Carbon Metabolism      | SPBC12C2.12c                                                                                                                                                                   |                      |
| hydroxyacylglutathione hydrolase (predicted)                                                       | Nucleus               | H2O + lgt-S -> GTHrd + H + dLAC                              | Alternate Carbon Metabolism      | SPCC13B11.03c<br>SPAC24C9.07c                                                                                                                                                  | 3.1.2.6              |
| 1,3-beta-glucan synthase                                                                           | Cytosol               | UDPg -> 13BDGLCn + H + UDP                                   | Alternate Carbon Metabolism      | SPBC19G7.05c<br>SPCC1840.02c<br>SPAC19B12.03<br>SPAC23H3.11c<br>SPAC17G6.11c                                                                                                   | 2.4.1.34             |
| 1,6-beta-glucan synthase                                                                           | Cytosol               | UDPg -> 16BDGLCn + H + UDP                                   | Alternate Carbon Metabolism      |                                                                                                                                                                                |                      |
| 1,3-alpha-glucan synthase                                                                          | Cytosol               | UDPg -> 13ADGLCn + H + UDP                                   | Alternate Carbon Metabolism      |                                                                                                                                                                                |                      |
| Aminooctone: oxygen oxidoreductase( deaminating)(flavin-containing) (R,R)-butanediol dehydrogenase | Cytosol               | aact + H2O + O2 -> H2O2 + mtHgxl + NH4                       | Alternate Carbon Metabolism      |                                                                                                                                                                                |                      |
| hydroxyacylglutathione hydrolase (predicted)                                                       | Cytosol               | bt-d-RR + NAD <-> actn-R + H + NADH                          | Alternate Carbon Metabolism      |                                                                                                                                                                                | 1.1.1.4              |
| lactaldehyde dehydrogenase                                                                         | Cytosol               | H2O + lgt-S -> GTHrd + H + dLAC                              | Alternate Carbon Metabolism      | SPAC824.07                                                                                                                                                                     | 3.1.2.6              |
| lactaldehyde dehydrogenase                                                                         | Cytosol               | H2O + lald-L + NAD -> 2 H + LAC + NADH                       | Alternate Carbon Metabolism      |                                                                                                                                                                                |                      |
| lactoylglutathione lyase                                                                           | Cytosol               | GTHrd + mtHgxl -> lgt-S                                      | Alternate Carbon Metabolism      | SPBC12C2.12c                                                                                                                                                                   |                      |
| methylglyoxal synthase                                                                             | Cytosol               | DHAP -> mtHgxl + Pi                                          | Alternate Carbon Metabolism      |                                                                                                                                                                                |                      |
| D-sorbitol dehydrogenase (D-fructose producing)                                                    | Cytosol               | NAD + sbt-D -> fru + H + NADH                                | Alternate Carbon Metabolism      | SPBC1773.05c                                                                                                                                                                   | 1.1.1.14             |
| L-sorbitol dehydrogenase (L-sorbose-producing)                                                     | Cytosol               | NAD + sbt-L -> H + NADH + srb-L                              | Alternate Carbon Metabolism      | SPBC1773.05c                                                                                                                                                                   | 1.1.1.14             |
| trehalose-phosphatase                                                                              | Cytosol               | H2O + TRE6p -> Pi + TRE                                      | Alternate Carbon Metabolism      | SPAC328.03+SPAC19G1<br>2.15c+SPAC22F8.05<br>SPAC328.03+SPAC19G1<br>2.15c+SPACUNK4.16c<br>SPAC328.03+SPAC19G1<br>2.15c+SPAC22F8.05<br>SPAC328.03+SPAC19G1<br>2.15c+SPACUNK4.16c | 2.4.1.15             |
| alpha.alpha-trehalose-phosphate synthase (UDP-forming)                                             | Cytosol               | G6P + UDPg -> H + TRE6p + UDP                                | Alternate Carbon Metabolism      |                                                                                                                                                                                | 2.4.1.15             |
| alpha.alpha-trehalase                                                                              | Cytosol               | H2O + TRE -> 2 GLC                                           | Alternate Carbon Metabolism      | SPBC660.07                                                                                                                                                                     | 3.2.1.28             |
| alpha.alpha-trehalase (vacuolar)                                                                   | Vacuole               | H2O + TRE -> 2 GLC                                           | Alternate Carbon Metabolism      |                                                                                                                                                                                | 3.2.1.28             |
| 2-Hydroxybutyrate:NAD+ oxidoreductase                                                              | Cytosol               | 2Hb + NAD -> 2obut + NADH + H                                | Anaplerotic reactions            | SPAC186.08c                                                                                                                                                                    | 1.1.1.27             |
| 1-aminocyclopropane-1-carboxylate aminohydrolase (isomerizing)                                     | Cytosol               | ACPIc + H2O <-> 2obut + NH4                                  | Anaplerotic reactions            | SPAC922.03                                                                                                                                                                     | 3.5.99.7             |
| malic enzyme (NAD)                                                                                 | Cytosol               | MAL + NAD -> CO2 + NADH + PYR                                | Anaplerotic reactions            | SPCC794.12c                                                                                                                                                                    | 1.1.1.38             |
| malic enzyme (NADP)                                                                                | Cytosol               | MAL + NADP -> CO2 + NADPH + PYR                              | Anaplerotic reactions            | SPCC794.12c                                                                                                                                                                    | 1.1.1.38             |
| fructose-bisphosphatase                                                                            | Cytosol               | FDP + H2O -> F6P + Pi                                        | Anaplerotic reactions            | SPBC1198.14c                                                                                                                                                                   | 3.1.3.11             |
| Isocitrate lyase                                                                                   | Cytosol               | ICIT -> GLX + SUCC                                           | Anaplerotic reactions            | SPBC1683.11c                                                                                                                                                                   | 4.1.3.1              |
| methylisocitrate lyase                                                                             | Mitochondria          | MICIT -> PYR + SUCC                                          | Anaplerotic reactions            | SPBC1683.11c                                                                                                                                                                   | 4.1.3.1              |
| 2-methylcitrate synthase                                                                           | Mitochondria          | H2O + OAA + ppCoA -> 2MCIT + CoA + H                         | Anaplerotic reactions            | SPAC6C3.04                                                                                                                                                                     | 2.3.3.1              |
| malic enzyme (NAD)                                                                                 | Mitochondria          | MAL + NAD -> CO2 + NADH + PYR                                | Anaplerotic reactions            | SPCC794.12c                                                                                                                                                                    | 1.1.1.38             |
| malic enzyme (NADP)                                                                                | Mitochondria          | MAL + NADP -> CO2 + NADPH + PYR                              | Anaplerotic reactions            | SPCC794.12c                                                                                                                                                                    | 1.1.1.38             |
| pyruvate carboxylase                                                                               | Cytosol               | ATP + HCO3 + PYR -> ADP + H + OAA + Pi                       | Anaplerotic reactions            | SPBC17G9.11c                                                                                                                                                                   | 6.4.1.1              |
| Estrone 3-sulfate sulfohydrolase                                                                   | Cytosol               | e3s + H2O -> est + SO4                                       | Androgen and Estrogen Metabolism | SPBPB10D8.02c                                                                                                                                                                  | 3.1.6.1              |
| Estrone 3-sulfate sulfohydrolase                                                                   | Nucleus               | e3s + H2O -> est + SO4                                       | Androgen and Estrogen Metabolism | SPBPB10D8.02c                                                                                                                                                                  | 3.1.6.1              |
| D-arabinono-1,4-lactone oxidase                                                                    | Mitochondria          | Dara14lac + O2 <-> ertascb-D + H2O2                          | Arabinose Metabolism             | SPAPB1A10.12c                                                                                                                                                                  |                      |
| D-arabinose 1-dehydrogenase (NADP)                                                                 | Cytosol               | arab-D + NADP -> Dara14lac + H + NADPH                       | Arabinose Metabolism             |                                                                                                                                                                                |                      |
| ornithine cyclodeaminase                                                                           | Cytosol               | ORN <-> PRO + NH4                                            | Arginine and Proline Metabolism  | SPAP11E10.01                                                                                                                                                                   | 4.3.1.12             |
| ornithine carbamoyltransferase                                                                     | Mitochondria          | cbp + ORN -> CITR + H + Pi                                   | Arginine and Proline Metabolism  | SPAC4G9.10                                                                                                                                                                     | 2.1.3.3              |
| deoxyhypusine synthase/c/nucleus                                                                   | Nucleus               | H2O[n] + Q6[m] + spmd[n] -> 13dAMPp[n] + 4abutn[n] + Q6H2[m] | Arginine and Proline Metabolism  | SPBC1271.04c                                                                                                                                                                   | 2.5.1.46             |
| acetylornithine transaminase                                                                       | Nucleus               | acg5SA + GLU -> acorn + AKG                                  | Arginine and Proline Metabolism  | SPCC777.09c                                                                                                                                                                    | 2.6.1.11             |
| ornithine transaminase                                                                             | Nucleus               | AKG + ORN -> GLU + GLUSSA                                    | Arginine and Proline Metabolism  | SPBC21C3.08c                                                                                                                                                                   | 2.6.1.13             |
| spermidine synthase                                                                                | Nucleus               | ametam + ptrc -> 5mta + H + spmd                             | Arginine and Proline Metabolism  | SPBC12C2.07c                                                                                                                                                                   | 2.5.1.16             |
| arginase                                                                                           | Nucleus               | ARG + H2O -> ORN + urea                                      | Arginine and Proline Metabolism  | SPBP26C9.02c<br>SPAC3H1.07                                                                                                                                                     | 3.5.3.1              |
| glutamate-5-semialdehyde dehydrogenase                                                             | Nucleus               | GLU5p + H + NADPH -> GLUSSA + NADP + Pi                      | Arginine and Proline Metabolism  | SPAC821.11                                                                                                                                                                     | 1.2.1.41             |
| Ornithine Decarboxylase                                                                            | Nucleus               | H + ORN -> CO2 + ptrc                                        | Arginine and Proline Metabolism  | SPAC144.04c                                                                                                                                                                    | 4.1.1.17             |
| L-4-hydroxyglutamate semialdehyde dehydrogenase                                                    | Mitochondria          | 4HGLUSA + H2O + NAD <-> e4HGLU + 2 H + NADH                  | Arginine and Proline Metabolism  | SPBC24C6.04                                                                                                                                                                    |                      |
| acetylglutamate kinase                                                                             | Mitochondria          | acGLU + ATP -> acg5p + ADP                                   | Arginine and Proline Metabolism  | SPAC4G9.09c                                                                                                                                                                    | 1.2.1.38,<br>2.7.2.8 |
| N-acetylglutamate synthase (predicted)                                                             | Mitochondria          | ACCoA + GLU -> acGLU + CoA + H                               | Arginine and Proline Metabolism  | SPBC1271.14                                                                                                                                                                    | 2.3.1.35,<br>2.3.1.1 |
| acetylornithine transaminase                                                                       | Mitochondria          | acg5SA + GLU -> acorn + AKG                                  | Arginine and Proline Metabolism  | SPCC777.09c                                                                                                                                                                    | 2.6.1.11             |
| N-acetyl-g-glutamyl-phosphate reductase                                                            | Mitochondria          | acg5p + H + NADPH -> acg5SA + NADP + Pi                      | Arginine and Proline Metabolism  | SPAC4G9.09c                                                                                                                                                                    | 1.2.1.38,<br>2.7.2.8 |
| amidase                                                                                            | Cytosol               | 4gudbd + H2O -> 4gudbutn + NH4                               | Arginine and Proline Metabolism  | SPBPB8B6.03                                                                                                                                                                    | 3.5.1.4              |
| arginase                                                                                           | Cytosol               | ARG + H2O -> ORN + urea                                      | Arginine and Proline Metabolism  | SPBP26C9.02c<br>SPAC3H1.07                                                                                                                                                     | 3.5.3.1              |
| argininosuccinate lyase                                                                            | Cytosol               | argsuc <-> ARG + FUM                                         | Arginine and Proline Metabolism  | SPBC1539.03c<br>SPBC1773.14                                                                                                                                                    | 4.3.2.1              |
| argininosuccinate synthase                                                                         | Cytosol               | ASP + ATP + CITR <-> AMP + argsuc + H + PPI                  | Arginine and Proline Metabolism  | SPBC428.05c                                                                                                                                                                    | 6.3.4.5              |

|                                                                          |                 |                                                                      |                                 |                                                                                                                                                                                                                                                             |                      |
|--------------------------------------------------------------------------|-----------------|----------------------------------------------------------------------|---------------------------------|-------------------------------------------------------------------------------------------------------------------------------------------------------------------------------------------------------------------------------------------------------------|----------------------|
| carbamoyl-phosphate synthase (glutamine-hydrolyzing)                     | Cytosol         | 2 ATP + GLN + H2O + HCO3 <sup>-</sup> → 2 ADP + cbp + GLU + 2 H + Pi | Arginine and Proline Metabolism | SPAC22G7.06c<br>SPAC16.03c<br>SPBC56F2.09c                                                                                                                                                                                                                  | 6.3.5.5,<br>2.1.3.2  |
| deoxyhypusine synthase                                                   |                 | H2O[c] + Q6[m] + spmd[c] → 13dAMPp[c] + 4abutn[c] + Q6H2[m]          | Arginine and Proline Metabolism | SPBC1271.04c                                                                                                                                                                                                                                                | 2.5.1.46             |
| L-erythro-4-Hydroxyglutamate:2-oxoglutarate aminotransferase (predicted) | Cytosol         | AKG + e4HGLU → 4H2Ogl + GLU                                          | Arginine and Proline Metabolism | SPAC10F6.13c                                                                                                                                                                                                                                                | 2.6.1.1              |
| L-erythro-4-Hydroxyglutamate:2-oxoglutarate aminotransferase (predicted) | Mitochondria    | AKG + e4HGLU → 4H2Ogl + GLU                                          | Arginine and Proline Metabolism | SPBC725.01                                                                                                                                                                                                                                                  | 2.6.1.1              |
| L-glutamate 5-semialdehyde dehydratase                                   | Cytosol         | GLU5SA ↔ 1PYR5c + H + H2O                                            | Arginine and Proline Metabolism |                                                                                                                                                                                                                                                             |                      |
| L-glutamate 5-semialdehyde dehydratase                                   | Mitochondria    | GLU5SA ↔ 1PYR5c + H + H2O                                            | Arginine and Proline Metabolism |                                                                                                                                                                                                                                                             |                      |
| glutamate-5-semialdehyde dehydrogenase                                   | Cytosol         | GLU5p + H + NADPH → GLU5SA + NADP + Pi                               | Arginine and Proline Metabolism | SPAC821.11                                                                                                                                                                                                                                                  | 1.2.1.41             |
| glutamate 5-kinase                                                       | Cytosol         | ATP + GLU → ADP + GLU5p                                              | Arginine and Proline Metabolism | SPAC17H9.13c                                                                                                                                                                                                                                                | 2.7.2.11             |
| L-hydroxyproline reductase (NAD)                                         | Cytosol         | 1p3H5c + 2 H + NADH → 4HPROT + NAD                                   | Arginine and Proline Metabolism | SPAPYUG7.05                                                                                                                                                                                                                                                 | 1.5.1.2              |
| L-hydroxyproline reductase (NADP)                                        | Cytosol         | 1p3H5c + 2 H + NADPH → 4HPROT + NADP                                 | Arginine and Proline Metabolism | SPAPYUG7.05                                                                                                                                                                                                                                                 | 1.5.1.2              |
| L-hydroxyproline dehydrogenase (NAD)                                     | Mitochondria    | 4HPROT + NAD → 1p3H5c + 2 H + NADH                                   | Arginine and Proline Metabolism | SPBC24C6.04                                                                                                                                                                                                                                                 |                      |
| L-hydroxyproline dehydrogenase (NADP)                                    | Mitochondria    | 4HPROT + NADP → 1p3H5c + 2 H + NADPH                                 | Arginine and Proline Metabolism | SPBC24C6.04                                                                                                                                                                                                                                                 |                      |
| ornithine carbamoyltransferase                                           | Cytosol         | cbp + ORN → CITR + H + Pi                                            | Arginine and Proline Metabolism | SPAC4G9.10                                                                                                                                                                                                                                                  | 2.1.3.3              |
| Ornithine Decarboxylase                                                  | Cytosol         | H + ORN → CO2 + ptrc                                                 | Arginine and Proline Metabolism | SPAC144.04c                                                                                                                                                                                                                                                 | 4.1.1.17             |
| ornithine transaminase                                                   | Cytosol         | AKG + ORN → GLU + GLU5SA                                             | Arginine and Proline Metabolism | SPBC21C3.08c                                                                                                                                                                                                                                                | 2.6.1.13             |
| glutamate N-acetyltransferase (predicted)                                | Mitochondria    | acom + GLU → acGLU + ORN                                             | Arginine and Proline Metabolism | SPBC1271.14                                                                                                                                                                                                                                                 | 2.3.1.35,<br>2.3.1.1 |
| pyrroline-5-carboxylate reductase                                        | Cytosol         | 1PYR5c + 2 H + NADPH → NADP + PRO                                    | Arginine and Proline Metabolism | SPAPYUG7.05                                                                                                                                                                                                                                                 | 1.5.1.2              |
| L-1-pyrroline-3-hydroxy-5-carboxylate dehydrogenase                      | Mitochondria    | 1p3H5c + 2 H2O + NAD → e4HGLU + H + NADH                             | Arginine and Proline Metabolism | SPBC24C6.04                                                                                                                                                                                                                                                 |                      |
| spontaneous conversion to L-4-Hydroxyglutamate                           | Mitochondria    | 1p3H5c + H + H2O ↔ 4HGLUSA                                           | Arginine and Proline Metabolism |                                                                                                                                                                                                                                                             |                      |
| spermidine synthase                                                      | Cytosol         | ametam + ptrc → 5mta + H + spmd                                      | Arginine and Proline Metabolism | SPBC12C2.07c                                                                                                                                                                                                                                                | 2.5.1.16             |
| L-asparaginase                                                           | Golgi apparatus | ASN + H2O → ASP + NH4                                                | Asparagine metabolism           | SPAC186.03 SPAC977.12<br>SPBPB8B6.05c                                                                                                                                                                                                                       | 3.5.1.1              |
| L-asparaginase                                                           | Cytoplasm       | ASN + H2O → ASP + NH4                                                | Asparagine metabolism           | SPBPB21E7.09<br>SPAC186.03 SPAC977.12<br>SPBPB8B6.05c                                                                                                                                                                                                       | 3.5.1.1              |
| L-asparaginase                                                           | Extracellular   | ASN + H2O → ASP + NH4                                                | Asparagine metabolism           | SPBPB21E7.09<br>SPAC186.03 SPAC977.12<br>SPBPB8B6.05c                                                                                                                                                                                                       | 3.5.1.1              |
| Isocitrate dehydrogenase (NAD+)                                          | Mitochondria    | ICIT + NAD ↔ AKG + CO2 + NADH                                        | Citric Acid Cycle               | SPAC11G7.03<br>SPBC902.05c                                                                                                                                                                                                                                  | 1.1.1.41             |
| isocitrate dehydrogenase (NADP)                                          | Cytosol         | ICIT + NADP ↔ AKG + CO2 + NADPH                                      | Citric Acid Cycle               | SPAC11G7.03<br>SPBC902.05c                                                                                                                                                                                                                                  | 1.1.1.41             |
| Isocitrate dehydrogenase (NADP+)                                         | Mitochondria    | ICIT + NADP ↔ AKG + CO2 + NADPH                                      | Citric Acid Cycle               | SPAC11G7.03<br>SPBC902.05c                                                                                                                                                                                                                                  | 1.1.1.41             |
| Isocitrate dehydrogenase (NADP+)                                         | Peroxisome      | ICIT + NADP ↔ AKG + CO2 + NADPH                                      | Citric Acid Cycle               | SPAC11G7.03<br>SPBC902.05c                                                                                                                                                                                                                                  | 1.1.1.41             |
| ATP citrate synthase                                                     | Mitochondria    | ADP + Pi + ACCoA + OAA → CIT + ATP + CoA                             | Citric Acid Cycle               | SPAC22A12.16                                                                                                                                                                                                                                                | 2.3.3.8              |
| aconitase                                                                | Cytosol         | CIT ↔ ICIT                                                           | Citric Acid Cycle               | SPAC24C9.06c<br>SPBP4H10.15                                                                                                                                                                                                                                 | 4.2.1.3              |
| Aconitate hydratase                                                      | Mitochondria    | CIT ↔ ICIT                                                           | Citric Acid Cycle               | SPAC24C9.06c<br>SPBP4H10.15                                                                                                                                                                                                                                 | 4.2.1.3              |
| oxoglutarate dehydrogenase (lipoamide)                                   | Mitochondria    | AKG + H + lpam ↔ CO2 + sdHlam                                        | Citric Acid Cycle               | SPBC3H7.03c                                                                                                                                                                                                                                                 | 1.2.4.2              |
| oxoglutarate dehydrogenase (dihydrolipoamide S-succinyltransferase)      | Mitochondria    | CoA + sdHlam → dHlam + SUCCoA                                        | Citric Acid Cycle               | SPBC3H7.03c                                                                                                                                                                                                                                                 | 1.2.4.2              |
| citrate synthase                                                         | Mitochondria    | ACCoA + H2O + OAA → CIT + CoA + H                                    | Citric Acid Cycle               | SPAC6C3.04                                                                                                                                                                                                                                                  | 2.3.3.1              |
| citrate synthase                                                         | Peroxisome      | ACCoA + H2O + OAA → CIT + CoA + H                                    | Citric Acid Cycle               | SPAC6C3.04                                                                                                                                                                                                                                                  | 2.3.3.1              |
| Itaconate-CoA ligase (ADP-forming)                                       | Mitochondria    | ATP + CoA + itacon ↔ ADP + itACCoA + Pi                              | Citric Acid Cycle               | SPCC1620.08<br>SPAC16E8.17c                                                                                                                                                                                                                                 | 6.2.1.4,<br>6.2.1.5  |
| succinate dehydrogenase (ubiquinone-6)                                   | Mitochondria    | Q6 + SUCC ↔ FUM + Q6H2                                               | Citric Acid Cycle               | SPBP23A10.16+SPAC14<br>0.01+SPCC330.12c+<br>SPAC1556.02c<br>SPBP23A10.16+SPAC14<br>0.01+SPCC330.12c+<br>SPAC1556.02c<br>SPAC140.01+SPAC1556.<br>1.3.5.1<br>02c+SPCC330.12c+<br>SPBP23A10.16<br>SPAC140.01+SPAC1556.<br>02c+<br>SPBP23A10.16+SPCC33<br>0.12c |                      |
| Succinate-CoA ligase (ADP-forming)                                       | Mitochondria    | ATP + CoA + SUCC ↔ ADP + Pi + SUCCoA                                 | Citric Acid Cycle               | SPCC1620.08<br>SPAC16E8.17c                                                                                                                                                                                                                                 | 6.2.1.4,<br>6.2.1.5  |
| 3-Isopropylmalate 3-methyltransferase                                    | Cytosol         | 3c2Hmp + SAM → 3ipmmst + SAH                                         | Complex Alcohol Metabolism      | SPAC25B8.09<br>SPAC25B8.10<br>SPAC13A11.06<br>SPAC3G9.11c<br>SPAC186.09<br>SPAC1F8.07c                                                                                                                                                                      |                      |
| 4-Methyl-2-oxopentanoate decarboxylase                                   | Cytosol         | 4MOP + H → 3mbald + CO2                                              | Complex Alcohol Metabolism      | SPCC126.10                                                                                                                                                                                                                                                  | 4.1.1.1              |
| Isoamyl acetate-hydrolyzing esterase                                     | Cytosol         | H2O + iamac → AC + H + IAMOH                                         | Complex Alcohol Metabolism      | SPCC126.10                                                                                                                                                                                                                                                  |                      |
| Isobutyl acetate-hydrolyzing esterase                                    | Cytosol         | H2O + ibutac → AC + H + IBUTOH                                       | Complex Alcohol Metabolism      | SPCC126.10                                                                                                                                                                                                                                                  |                      |
| Ethyl acetate-hydrolyzing esterase                                       | Cytosol         | aces + H2O → AC + ETOH + H                                           | Complex Alcohol Metabolism      | SPCC126.10                                                                                                                                                                                                                                                  |                      |
| aldehyde dehydrogenase (2-methylbutanol, NAD)                            | Cytosol         | 2mbald + H + NADH → 2mbtoH + NAD                                     | Complex Alcohol Metabolism      | SPBC1773.06c<br>SPAC5H10.06c                                                                                                                                                                                                                                | 1.1.1.1              |
| aldehyde dehydrogenase (2-methylbutanol, NAD)                            | Mitochondria    | 2mbald + H + NADH → 2mbtoH + NAD                                     | Complex Alcohol Metabolism      | SPCC13B11.01                                                                                                                                                                                                                                                | 1.1.1.1              |
| aldehyde dehydrogenase (2-methylbutanol, NADP)                           | Cytosol         | 2mbald + H + NADPH → 2mbtoH + NADP                                   | Complex Alcohol Metabolism      |                                                                                                                                                                                                                                                             |                      |
| aldehyde dehydrogenase (isobutyl alcohol, NAD)                           | Cytosol         | 2mppal + H + NADH → IBUTOH + NAD                                     | Complex Alcohol Metabolism      | SPBC1773.06c<br>SPAC5H10.06c                                                                                                                                                                                                                                | 1.1.1.1              |
| aldehyde dehydrogenase (isobutyl alcohol, NAD)                           | Mitochondria    | 2mppal + H + NADH → IBUTOH + NAD                                     | Complex Alcohol Metabolism      | SPCC13B11.01                                                                                                                                                                                                                                                | 1.1.1.1              |
| aldehyde dehydrogenase (isoamyl alcohol, NAD)                            | Cytosol         | 3mbald + H + NADH → IAMOH + NAD                                      | Complex Alcohol Metabolism      | SPBC1773.06c<br>SPAC5H10.06c                                                                                                                                                                                                                                | 1.1.1.1              |
| aldehyde dehydrogenase (isoamyl alcohol, NAD)                            | Mitochondria    | 3mbald + H + NADH → IAMOH + NAD                                      | Complex Alcohol Metabolism      | SPCC13B11.01                                                                                                                                                                                                                                                | 1.1.1.1              |
| aldehyde dehydrogenase (2-phenylethanol, NAD)                            | Cytosol         | H + NADH + PACALD → 2PHETOH + NAD                                    | Complex Alcohol Metabolism      | SPBC1773.06c<br>SPAC5H10.06c                                                                                                                                                                                                                                | 1.1.1.1              |
| aldehyde dehydrogenase (2-phenylethanol, NAD)                            | Mitochondria    | H + NADH + PACALD → 2PHETOH + NAD                                    | Complex Alcohol Metabolism      | SPCC13B11.01                                                                                                                                                                                                                                                | 1.1.1.1              |
| aldehyde dehydrogenase (tryptophol, NAD)                                 | Cytosol         | H + id3acald + NADH → ind3eth + NAD                                  | Complex Alcohol Metabolism      | SPBC1773.06c<br>SPAC5H10.06c                                                                                                                                                                                                                                | 1.1.1.1              |
| aldehyde dehydrogenase (tryptophol, NAD)                                 | Mitochondria    | H + id3acald + NADH → ind3eth + NAD                                  | Complex Alcohol Metabolism      | SPCC13B11.01                                                                                                                                                                                                                                                | 1.1.1.1              |
| Alcohol Acetyltransferase (ethanol)                                      | Cytosol         | ACCoA + ETOH → acs + CoA                                             | Complex Alcohol Metabolism      |                                                                                                                                                                                                                                                             |                      |
| Alcohol Acetyltransferase (isoamyl alcohol)                              | Cytosol         | ACCoA + IAMOH → CoA + iamac                                          | Complex Alcohol Metabolism      |                                                                                                                                                                                                                                                             |                      |
| Alcohol Acetyltransferase (2-methylbutanol)                              | Cytosol         | 2mbtoH + ACCoA → 2mbac + CoA                                         | Complex Alcohol Metabolism      |                                                                                                                                                                                                                                                             |                      |
| Alcohol Acetyltransferase (isobutyl alcohol)                             | Cytosol         | ACCoA + IBUTOH → CoA + ibutac                                        | Complex Alcohol Metabolism      |                                                                                                                                                                                                                                                             |                      |
| Alcohol Acetyltransferase (Phenylethanol alcohol)                        | Cytosol         | 2PHETOH + ACCoA → CoA + PHEAC                                        | Complex Alcohol Metabolism      |                                                                                                                                                                                                                                                             |                      |
| cysteine synthase                                                        | Mitochondria    | ACSER + H2S → AC + CYS + H                                           | Cysteine Metabolism             | SPBC36.04<br>SPAC3A12.17c                                                                                                                                                                                                                                   | 2.5.1.47             |
| 3',5'-bisphosphate nucleotidase                                          | Nucleus         | H2O + PAP → AMP + Pi                                                 | Cysteine Metabolism             | SPCC1753.04                                                                                                                                                                                                                                                 | 3.1.3.7              |

|                                                       |                       |                                                                               |                         |                                                                          |                       |
|-------------------------------------------------------|-----------------------|-------------------------------------------------------------------------------|-------------------------|--------------------------------------------------------------------------|-----------------------|
| phosphoadenylyl-sulfate reductase (thioredoxin)       | Nucleus               | PAPS + TRDrd -> 2 H + PAP + SO3 + TRDox                                       | Cysteine Metabolism     | SPAC13G7.06                                                              | 1.8.4.8               |
| 2-hydroxybutyrate cotransport with proton             |                       | 2Hb[e] + H[e] <> 2Hb[c] + H[c]                                                | Cysteine Metabolism     |                                                                          |                       |
| adenylyl-sulfate kinase                               | Cytosol               | APS + ATP -> ADP + H + PAPS                                                   | Cysteine Metabolism     | SPAC1782.11                                                              | 2.7.1.25              |
| adenylyl-sulfate kinase                               | Nucleus               | APS + ATP -> ADP + H + PAPS                                                   | Cysteine Metabolism     | SPAC1782.11                                                              | 2.7.1.25              |
| 3',5'-bisphosphate nucleotidase                       | Cytosol               | H2O + PAP -> AMP + Pi                                                         | Cysteine Metabolism     | SPCC1753.04                                                              | 3.1.3.7               |
| phosphoadenylyl-sulfate reductase (thioredoxin)       | Cytosol               | PAPS + TRDrd -> 2 H + PAP + SO3 + TRDox                                       | Cysteine Metabolism     | SPAC13G7.06                                                              | 1.8.4.8               |
| sulfate adenylyltransferase                           | Cytosol               | ATP + H + SO4 -> APS + PPi                                                    | Cysteine Metabolism     | SPBC27.08c                                                               | 2.7.7.4               |
| sulfate adenylyltransferase                           | Mitochondria          | ATP + H + SO4 -> APS + PPi                                                    | Cysteine Metabolism     | SPBC27.08c                                                               | 2.7.7.4               |
| serine O-acetyltransferase                            | Cytosol               | ACCoA + SER -> ACSER + CoA                                                    | Cysteine Metabolism     | SPAC1039.08                                                              | 2.3.1.30              |
| sulfite reductase (NADPH2)                            | Cytosol               | 3 H2O + H2S + 3 NADP <> 5 H + 3 NADPH + SO3                                   | Cysteine Metabolism     | SPCC584.01c<br>SPAC10F6.01c                                              | 1.8.1.2               |
| fatty-acid--CoA ligase (tetradecanoate)               | Golgi apparatus       | ATP + CoA + C140 <> AMP + PPi + C140CoA                                       | Fatty Acid Biosynthesis | SPBP4H10.11c                                                             |                       |
| fatty acid synthase (n-C14:1)                         | Endoplasmic Reticulum | C120 + 4 H + MALCoA + 3 NADPH + O2 -> CO2 + CoA + 3 H2O + 3 NADP + C141       | Fatty Acid Biosynthesis | SPAC1B2.03c                                                              |                       |
| fatty acid synthase (n-C16:1)                         | Endoplasmic Reticulum | C140 + 4 H + MALCoA + 3 NADPH + O2 -> CO2 + CoA + 3 H2O + 3 NADP + C161       | Fatty Acid Biosynthesis | SPAC1B2.03c                                                              |                       |
| fatty acid synthase (n-C18:1)                         | Endoplasmic Reticulum | C160 + 4 H + MALCoA + 3 NADPH + O2 -> CO2 + CoA + 3 H2O + 3 NADP + C181       | Fatty Acid Biosynthesis | SPAC1B2.03c                                                              |                       |
| fatty-acid--CoA ligase (tetradecanoate)               | Endoplasmic Reticulum | ATP + CoA + C140 <> AMP + PPi + C140CoA                                       | Fatty Acid Biosynthesis | SPBC18H10.02                                                             |                       |
| Palmitoyl-CoA desaturase (n-C16:0CoA -> n-C16:1CoA)   | Endoplasmic Reticulum | H + NADPH + O2 + C160CoA -> 2 H2O + C161CoA + NADP                            | Fatty Acid Biosynthesis | SPCC1281.06c                                                             | 1.14.19.1             |
| stearoyl-CoA desaturase (n-C18:0CoA -> n-C18:1CoA)    | Endoplasmic Reticulum | H + NADPH + O2 + C180CoA -> 2 H2O + NADP + C181CoA                            | Fatty Acid Biosynthesis | SPCC1281.06c                                                             | 1.14.19.1             |
| acetyl-CoA C-acetyltransferase                        | Cytosol               | 2 ACCoA -> AACoA + CoA                                                        | Fatty Acid Biosynthesis | SPBC215.09c                                                              | 2.3.1.9               |
| acetyl-CoA C-acetyltransferase                        | Mitochondria          | 2 ACCoA -> AACoA + CoA                                                        | Fatty Acid Biosynthesis | SPBC215.09c                                                              | 2.3.1.9               |
| acetyl-CoA carboxylase reaction                       | Cytosol               | ACCoA + ATP + HCO3 <> ADP + H + MALCoA + Pi                                   | Fatty Acid Biosynthesis | SPAC56E4.04c                                                             | 6.4.1.2               |
| Acetyl-Coa carboxylase                                | Mitochondria          | ACCoA + ATP + HCO3 <> ADP + H + MALCoA + Pi                                   | Fatty Acid Biosynthesis | SPAC56E4.04c                                                             | 6.4.1.2               |
| Acetyl-CoA ACP transacylase                           | Cytosol               | ACP + ACCoA <> ACACP + CoA                                                    | Fatty Acid Biosynthesis | SPAC926.09c + SPAC4A8.11c                                                | 3.1.2.14              |
| Acetyl-CoA ACP transacylase                           | Mitochondria          | ACP + ACCoA <> ACACP + CoA                                                    | Fatty Acid Biosynthesis | SPBC1105.15c<br>SPAC4H3.09<br>SPAC3G9.02<br>SPAC11G7.05c                 |                       |
| Myristicoyl-CoA desaturase (n-C14:0CoA -> n-C14:1CoA) | Cytosol               | H + NADPH + O2 + C140CoA -> 2 H2O + NADP + C141CoA                            | Fatty Acid Biosynthesis |                                                                          |                       |
| Oleoyl-CoA desaturase (n-C18:1CoA -> n-C18:2CoA)      | Cytosol               | H + NADPH + O2 + C181CoA -> 2 H2O + NADP + C182CoA                            | Fatty Acid Biosynthesis |                                                                          |                       |
| fatty-acyl-ACP hydrolase                              | Cytosol               | H2O + C120ACP <> ACP + H + C120                                               | Fatty Acid Biosynthesis | SPAC926.09c + SPAC4A8.11c                                                | 3.1.2.14              |
| fatty-acyl-ACP hydrolase                              | Cytosol               | H2O + C140ACP <> ACP + H + C140                                               | Fatty Acid Biosynthesis | SPAC926.09c + SPAC4A8.11c                                                | 3.1.2.14              |
| fatty-acyl-ACP hydrolase                              | Cytosol               | H2O + C141ACP <> ACP + H + C141                                               | Fatty Acid Biosynthesis | SPAC926.09c + SPAC4A8.11c                                                | 3.1.2.14              |
| fatty-acyl-ACP hydrolase                              | Cytosol               | H2O + C160ACP <> ACP + H + C160                                               | Fatty Acid Biosynthesis | SPAC926.09c + SPAC4A8.11c                                                | 3.1.2.14              |
| fatty-acyl-ACP hydrolase                              | Cytosol               | H2O + C161ACP <> ACP + H + C161                                               | Fatty Acid Biosynthesis | SPAC926.09c + SPAC4A8.11c                                                | 3.1.2.14              |
| fatty-acyl-ACP hydrolase                              | Cytosol               | H2O + C180ACP <> ACP + H + C180                                               | Fatty Acid Biosynthesis | SPAC926.09c + SPAC4A8.11c                                                | 3.1.2.14              |
| fatty-acyl-ACP hydrolase                              | Cytosol               | H2O + C181ACP <> ACP + H + C181                                               | Fatty Acid Biosynthesis | SPAC926.09c + SPAC4A8.11c                                                | 3.1.2.14              |
| fatty-acyl-ACP hydrolase                              | Cytosol               | H2O + C182ACP <> ACP + H + C182                                               | Fatty Acid Biosynthesis | SPAC926.09c + SPAC4A8.11c                                                | 3.1.2.14              |
| fatty-acid--CoA ligase (tetradecanoate)               | Cytosol               | ATP + CoA + C140 <> AMP + PPi + C140CoA                                       | Fatty Acid Biosynthesis | SPBP4H10.11c<br>SPBC18H10.02                                             | 6.2.1.3               |
| fatty-acid--CoA ligase (tetradecanoate)               | Cytosol               | ATP + CoA + C141 <> AMP + PPi + C141CoA                                       | Fatty Acid Biosynthesis | SPBP4H10.11c<br>SPBC18H10.02                                             |                       |
| fatty-acid--CoA ligase (hexadecanoate)                | Cytosol               | ATP + CoA + C160 <> AMP + PPi + C160CoA                                       | Fatty Acid Biosynthesis | SPBP4H10.11c<br>SPBC18H10.02                                             |                       |
| fatty-acid--CoA ligase (hexadecanoate)                | Cytosol               | ATP + CoA + C161 <> AMP + PPi + C161CoA                                       | Fatty Acid Biosynthesis | SPBP4H10.11c<br>SPBC18H10.02                                             |                       |
| fatty-acid--CoA ligase (Octadecanoate)                | Cytosol               | ATP + CoA + C180 <> AMP + PPi + C180CoA                                       | Fatty Acid Biosynthesis | SPBP4H10.11c<br>SPBC18H10.02                                             |                       |
| fatty-acid--CoA ligase (Octadecanoate)                | Cytosol               | ATP + CoA + C181 <> AMP + PPi + C181CoA                                       | Fatty Acid Biosynthesis | SPBP4H10.11c<br>SPBC18H10.02                                             |                       |
| fatty-acid--CoA ligase (Octadecanoate)                | Cytosol               | ATP + CoA + C182 <> AMP + PPi + C182CoA                                       | Fatty Acid Biosynthesis | SPBP4H10.11c<br>SPBC18H10.02                                             |                       |
| fatty acid synthase (n-C10:0)                         | Cytosol               | 3 H + MALCoA + 2 NADPH + C080 -> CO2 + CoA + C100 + H2O + 2 NADP              | Fatty Acid Biosynthesis | SPAC56E4.04c<br>SPAC926.09c + SPAC4A8.11c                                | 6.3.4.14,<br>3.1.2.14 |
| fatty-acyl-ACP synthase (n-C10:0ACP)                  | Mitochondria          | 3 H + MALACP + 2 NADPH + C080ACP -> ACP + CO2 + C100ACP + H2O + 2 NADP        | Fatty Acid Biosynthesis | SPBC1105.15c<br>SPAC4H3.09<br>SPAC3G9.02<br>SPAC11G7.05c<br>SPAC26F1.04c |                       |
| fatty acyl-CoA synthase (n-C10:0CoA)                  | Cytosol               | 3 H + MALCoA + 2 NADPH + C080CoA -> CO2 + CoA + C100CoA + H2O + 2 NADP        | Fatty Acid Biosynthesis | SPAC56E4.04c<br>SPAC926.09c + SPAC4A8.11c                                | 6.3.4.14,<br>3.1.2.14 |
| fatty acid synthase (n-C12:0)                         | Cytosol               | C100 + 3 H + MALCoA + 2 NADPH -> CO2 + CoA + C120 + H2O + 2 NADP              | Fatty Acid Biosynthesis | SPAC56E4.04c<br>SPAC926.09c + SPAC4A8.11c                                | 6.3.4.14,<br>3.1.2.14 |
| fatty-acyl-ACP synthase (n-C12:0ACP)                  | Mitochondria          | C100ACP + 3 H + MALACP + 2 NADPH -> ACP + CO2 + C120ACP + H2O + 2 NADP        | Fatty Acid Biosynthesis | SPBC1105.15c<br>SPAC4H3.09<br>SPAC3G9.02<br>SPAC11G7.05c<br>SPAC26F1.04c |                       |
| fatty-acyl-CoA synthase (n-C12:0CoA)                  | Cytosol               | C100CoA + 3 H + MALCoA + 2 NADPH -> CO2 + CoA + C120CoA + H2O + 2 NADP        | Fatty Acid Biosynthesis | SPAC56E4.04c<br>SPAC926.09c + SPAC4A8.11c                                | 6.3.4.14,<br>3.1.2.14 |
| fatty acid synthase (n-C14:0)                         | Cytosol               | C120 + 3 H + MALCoA + 2 NADPH -> CO2 + CoA + H2O + 2 NADP + C140              | Fatty Acid Biosynthesis | SPAC56E4.04c<br>SPAC926.09c + SPAC4A8.11c                                | 6.3.4.14,<br>3.1.2.14 |
| fatty-acyl-ACP synthase (n-C14:0ACP)                  | Mitochondria          | C120ACP + 3 H + MALACP + 2 NADPH -> ACP + CO2 + H2O + C140ACP + 2 NADP        | Fatty Acid Biosynthesis | SPBC1105.15c<br>SPAC4H3.09<br>SPAC3G9.02<br>SPAC11G7.05c<br>SPAC26F1.04c |                       |
| fatty-acyl-CoA synthase (n-C14:0CoA)                  | Cytosol               | C120CoA + 3 H + MALCoA + 2 NADPH -> CO2 + CoA + H2O + 2 NADP + C140CoA        | Fatty Acid Biosynthesis | SPAC56E4.04c<br>SPAC926.09c + SPAC4A8.11c                                | 6.3.4.14,<br>3.1.2.14 |
| fatty-acyl-ACP synthase (n-C14:1ACP)                  | Mitochondria          | C120ACP + 4 H + MALACP + 3 NADPH + O2 -> ACP + CO2 + 3 H2O + 3 NADP + C141ACP | Fatty Acid Biosynthesis | SPBC1105.15c<br>SPAC4H3.09<br>SPAC3G9.02<br>SPAC11G7.05c<br>SPAC26F1.04c |                       |
| fatty acid synthase (n-C16:0)                         | Cytosol               | 3 H + MALCoA + 2 NADPH + C140 -> CO2 + CoA + H2O + C160 + 2 NADP              | Fatty Acid Biosynthesis | SPAC56E4.04c<br>SPAC926.09c + SPAC4A8.11c                                | 6.3.4.14,<br>3.1.2.14 |

|                                                                    |                       |                                                                                                                                                                            |                         |                                                                                                                     |                       |
|--------------------------------------------------------------------|-----------------------|----------------------------------------------------------------------------------------------------------------------------------------------------------------------------|-------------------------|---------------------------------------------------------------------------------------------------------------------|-----------------------|
| fatty-acyl-ACP synthase (n-C16:0ACP)                               | Mitochondria          | $3\text{ H} + \text{MALACP} + \text{C140ACP} + 2\text{ NADPH} \rightarrow \text{ACP} + \text{CO}_2 + \text{H}_2\text{O} + 2\text{ NADP} + \text{C160ACP}$                  | Fatty Acid Biosynthesis | SPBC1105.15c<br>SPAC4H3.09<br>SPAC3G9.02<br>SPAC11G7.05c<br>SPAC26F1.04c<br>SPAC56E4.04c                            |                       |
| fatty-acyl-CoA synthase (n-C16:0CoA)                               | Cytosol               | $3\text{ H} + \text{MALCoA} + 2\text{ NADPH} + \text{C140CoA} \rightarrow \text{CO}_2 + \text{CoA} + \text{H}_2\text{O} + 2\text{ NADP} + \text{C160CoA}$                  | Fatty Acid Biosynthesis | SPAC926.09c+SPAC4A8.11c<br>SPBC1105.15c<br>SPAC4H3.09<br>SPAC3G9.02<br>SPAC11G7.05c<br>SPAC26F1.04c<br>SPAC56E4.04c | 6.3.4.14,<br>3.1.2.14 |
| fatty-acyl-ACP synthase (n-C16:1ACP)                               | Mitochondria          | $4\text{ H} + \text{MALACP} + \text{C140ACP} + 3\text{ NADPH} + \text{O}_2 \rightarrow \text{ACP} + \text{CO}_2 + 3\text{ H}_2\text{O} + \text{C161ACP} + 3\text{ NADP}$   | Fatty Acid Biosynthesis | SPBC1105.15c<br>SPAC4H3.09<br>SPAC3G9.02<br>SPAC11G7.05c<br>SPAC26F1.04c<br>SPAC56E4.04c                            |                       |
| fatty acid synthase (n-C18:0)                                      | Cytosol               | $3\text{ H} + \text{C160} + \text{MALCoA} + 2\text{ NADPH} \rightarrow \text{CO}_2 + \text{CoA} + \text{H}_2\text{O} + 2\text{ NADP} + \text{C180}$                        | Fatty Acid Biosynthesis | SPAC56E4.04c<br>SPAC926.09c+SPAC4A8.11c                                                                             | 6.3.4.14,<br>3.1.2.14 |
| fatty-acyl-ACP synthase (n-C18:0ACP)                               | Mitochondria          | $3\text{ H} + \text{MALACP} + 2\text{ NADPH} + \text{C160ACP} \rightarrow \text{ACP} + \text{CO}_2 + \text{H}_2\text{O} + 2\text{ NADP} + \text{C180ACP}$                  | Fatty Acid Biosynthesis | SPBC1105.15c<br>SPAC4H3.09<br>SPAC3G9.02<br>SPAC11G7.05c<br>SPAC26F1.04c<br>SPAC56E4.04c                            |                       |
| fatty-acyl-CoA synthase (n-C18:0CoA)                               | Cytosol               | $3\text{ H} + \text{MALCoA} + 2\text{ NADPH} + \text{C160CoA} \rightarrow \text{CO}_2 + \text{CoA} + \text{H}_2\text{O} + 2\text{ NADP} + \text{C180CoA}$                  | Fatty Acid Biosynthesis | SPAC926.09c+SPAC4A8.11c<br>SPBC1105.15c<br>SPAC4H3.09<br>SPAC3G9.02<br>SPAC11G7.05c<br>SPAC26F1.04c                 | 6.3.4.14,<br>3.1.2.14 |
| fatty-acyl-ACP synthase (n-C18:1ACP)                               | Mitochondria          | $4\text{ H} + \text{MALACP} + 3\text{ NADPH} + \text{O}_2 + \text{C160ACP} \rightarrow \text{ACP} + \text{CO}_2 + 3\text{ H}_2\text{O} + 3\text{ NADP} + \text{C181ACP}$   | Fatty Acid Biosynthesis | SPBC1105.15c<br>SPAC4H3.09<br>SPAC3G9.02<br>SPAC11G7.05c<br>SPAC26F1.04c                                            |                       |
| fatty-acyl-ACP synthase (n-C18:2ACP)                               | Mitochondria          | $5\text{ H} + \text{MALACP} + 4\text{ NADPH} + 2\text{ O}_2 + \text{C160ACP} \rightarrow \text{ACP} + \text{CO}_2 + 5\text{ H}_2\text{O} + 4\text{ NADP} + \text{C182ACP}$ | Fatty Acid Biosynthesis | SPBC1105.15c<br>SPAC4H3.09<br>SPAC3G9.02<br>SPAC11G7.05c<br>SPAC26F1.04c<br>SPAC56E4.04c                            |                       |
| fatty acid synthase (n-C8:0), lumped reaction                      | Cytosol               | $\text{ACCoA} + 8\text{ H} + 3\text{ MALCoA} + 6\text{ NADPH} \rightarrow 3\text{ CO}_2 + 4\text{ CoA} + 2\text{ H}_2\text{O} + 6\text{ NADP} + \text{C080}$               | Fatty Acid Biosynthesis | SPAC926.09c+SPAC4A8.11c<br>SPBC1105.15c<br>SPAC4H3.09<br>SPAC3G9.02<br>SPAC11G7.05c<br>SPAC26F1.04c                 | 6.3.4.14,<br>3.1.2.14 |
| fatty acyl-ACP synthase (n-C8:0ACP), lumped reaction               | Mitochondria          | $\text{ACACP} + 9\text{ H} + 3\text{ MALACP} + 6\text{ NADPH} \rightarrow 3\text{ ACP} + 3\text{ CO}_2 + 3\text{ H}_2\text{O} + 6\text{ NADP} + \text{C080ACP}$            | Fatty Acid Biosynthesis | SPAC56E4.04c<br>SPAC926.09c+SPAC4A8.11c                                                                             | 6.3.4.14,<br>3.1.2.14 |
| fatty acyl-CoA synthase (n-C8:0CoA), lumped reaction               | Cytosol               | $\text{ACCoA} + 9\text{ H} + 3\text{ MALCoA} + 6\text{ NADPH} \rightarrow 3\text{ CO}_2 + 3\text{ CoA} + 3\text{ H}_2\text{O} + 6\text{ NADP} + \text{C080CoA}$            | Fatty Acid Biosynthesis | SPAC926.09c+SPAC4A8.11c<br>SPBC1105.15c<br>SPAC4H3.09<br>SPAC3G9.02<br>SPAC11G7.05c<br>SPAC26F1.04c                 | 6.3.4.14,<br>3.1.2.14 |
| Malonyl-CoA-ACP transacylase                                       | Cytosol               | $\text{ACP} + \text{MALCoA} \leftrightarrow \text{CoA} + \text{MALACP}$                                                                                                    | Fatty Acid Biosynthesis | SPAC926.09c+SPAC4A8.11c<br>SPBC1105.15c<br>SPAC4H3.09<br>SPAC3G9.02<br>SPAC11G7.05c<br>SPAC26F1.04c                 | 3.1.2.14              |
| Malonyl-CoA-ACP transacylase                                       | Mitochondria          | $\text{ACP} + \text{MALCoA} \leftrightarrow \text{CoA} + \text{MALACP}$                                                                                                    | Fatty Acid Biosynthesis | SPBC1105.15c<br>SPAC4H3.09<br>SPAC3G9.02<br>SPAC11G7.05c<br>SPAC26F1.04c                                            |                       |
| dihydropteroate synthase                                           | Cytosol               | $2\text{AHHMD} + \text{PABA} \rightarrow \text{DHPT} + \text{PPi}$                                                                                                         | Folate Metabolism       | SPBC1734.03                                                                                                         | 4.1.2.25              |
| dihydropteroate synthase                                           | Cytosol               | $2\text{AHHMP} + \text{PABA} \rightarrow \text{DHPT} + \text{H}_2\text{O}$                                                                                                 | Folate Metabolism       | SPBC1734.03                                                                                                         | 4.1.2.25              |
| 2-amino-4-hydroxy-6-hydroxymethylidihydropteridine diphosphokinase | Cytosol               | $2\text{AHHMP} + \text{ATP} \rightarrow 2\text{AHHMD} + \text{AMP} + \text{H}$                                                                                             | Folate Metabolism       | SPBC1734.03                                                                                                         | 4.1.2.25              |
| dihydroneopterin aldolase                                          | Cytosol               | $\text{DHNPT} \rightarrow 2\text{AHHMP} + \text{gald} + \text{H}$                                                                                                          | Folate Metabolism       | SPBC1734.03                                                                                                         | 4.1.2.25              |
| 5,10-methylenetetrahydrofolatereductase (NADPH)                    | Mitochondria          | $2\text{ H} + \text{MLTHF} + \text{NADPH} \rightarrow 5\text{mTHF} + \text{NADP}$                                                                                          | Folate Metabolism       | SPAC56F8.10<br>SPAC227.09<br>SPBC1709.17                                                                            | 1.5.1.20<br>6.3.2.17  |
| Tetrahydrofolate:L-glutamate gamma-ligase (ADP-forming)            | Mitochondria          | $\text{ATP} + \text{GLU} + \text{THF} \leftrightarrow \text{ADP} + \text{H} + \text{Pi} + \text{THFGLU}$                                                                   | Folate Metabolism       | SPBC1709.17                                                                                                         | 6.3.2.17              |
| Tetrahydrofolate:L-glutamate gamma-ligase (ADP-forming)            | Nucleus               | $\text{ATP} + \text{GLU} + \text{THF} \leftrightarrow \text{ADP} + \text{H} + \text{Pi} + \text{THFGLU}$                                                                   | Folate Metabolism       | SPBC1709.17                                                                                                         | 6.3.2.17              |
| alkaline phosphatase (Dihydroneopterin), vacuole                   | Vacuole               | $\text{AHDT} + 3\text{ H}_2\text{O} \rightarrow \text{DHNPT} + 2\text{ H} + 3\text{ Pi}$                                                                                   | Folate Metabolism       | SPBC14F5.13c                                                                                                        | 3.1.3.1               |
| 5,10-methylenetetrahydrofolatereductase (NADPH)                    | Nucleus               | $2\text{ H} + \text{MLTHF} + \text{NADPH} \rightarrow 5\text{mTHF} + \text{NADP}$                                                                                          | Folate Metabolism       | SPAC56F8.10                                                                                                         | 1.5.1.20              |
| GTP cyclohydrolase I                                               | Nucleus               | $\text{GTP} + \text{H}_2\text{O} \rightarrow \text{AHDT} + \text{FORM} + \text{H}$                                                                                         | Folate Metabolism       | SPAC17A5.13                                                                                                         | 3.5.4.16              |
| methylenetetrahydrofolate dehydrogenase (NAD)                      | Nucleus               | $\text{MLTHF} + \text{NAD} \rightarrow \text{METHF} + \text{NADH}$                                                                                                         | Folate Metabolism       | SPBC1711.04                                                                                                         | 1.5.1.15              |
| 4-aminobenzoate synthase                                           | Cytosol               | $\text{ADCHO} \rightarrow \text{PABA} + \text{H} + \text{PYR}$                                                                                                             | Folate Metabolism       | SPBC19G7.02                                                                                                         |                       |
| 4-aminobenzoate synthase                                           | Nucleus               | $\text{ADCHO} \rightarrow \text{PABA} + \text{H} + \text{PYR}$                                                                                                             | Folate Metabolism       | SPBC19G7.02                                                                                                         |                       |
| para-aminobenzoate synthase                                        | Cytosol               | $\text{CHOR} + \text{GLN} \rightarrow \text{ADCHO} + \text{GLU}$                                                                                                           | Folate Metabolism       | SPBP8B7.29                                                                                                          |                       |
| aspartate oxidase                                                  | Cytosol               | $\text{ASP}[c] + \text{fad}[m] \rightarrow \text{FADH2}[m] + \text{H}[c] + \text{IMASP}[c]$                                                                                | Folate Metabolism       | SPCC1223.08c                                                                                                        | 1.5.1.3               |
| dihydrofolate reductase                                            | Cytosol               | $\text{DHF} + \text{H} + \text{NADPH} \rightarrow \text{NADP} + \text{THF}$                                                                                                | Folate Metabolism       | SPCC1223.08c                                                                                                        | 1.5.1.3               |
| dihydrofolate reductase                                            | Mitochondria          | $\text{DHF} + \text{H} + \text{NADPH} \rightarrow \text{NADP} + \text{THF}$                                                                                                | Folate Metabolism       | SPCC1223.08c                                                                                                        | 1.5.1.3               |
| dihydrofolate synthase                                             | Cytosol               | $\text{ATP} + \text{DHPT} + \text{GLU} \rightarrow \text{ADP} + \text{DHF} + \text{H} + \text{Pi}$                                                                         | Folate Metabolism       |                                                                                                                     |                       |
| dihydroneopterin aldolase                                          | Mitochondria          | $\text{DHNPT} \rightarrow 2\text{AHHMP} + \text{gald} + \text{H}$<br>$\text{gald} \rightarrow \text{pydxn}$                                                                | Folate Metabolism       | SPBC1734.03                                                                                                         | 4.1.2.25              |
| dihydropteroate synthase                                           | Mitochondria          | $2\text{AHHMP} + \text{PABA} \rightarrow \text{DHPT} + \text{H}_2\text{O}$                                                                                                 | Folate Metabolism       | SPBC1734.03                                                                                                         | 4.1.2.25              |
| Dihydroneopterin monophosphate dephosphorylase                     | Nucleus               | $\text{dHpmp} + \text{H}_2\text{O} \rightarrow \text{DHNPT} + \text{Pi}$                                                                                                   | Folate Metabolism       | SPBC14F5.13c                                                                                                        | 3.6.3.16              |
| Dihydroneopterin monophosphate dephosphorylase                     | Endoplasmic Reticulum | $\text{dHpmp} + \text{H}_2\text{O} \rightarrow \text{DHNPT} + \text{Pi}$                                                                                                   | Folate Metabolism       | SPBC14F5.13c                                                                                                        | 3.6.3.16              |
| Dihydroneopterin monophosphate dephosphorylase                     | Cytosol               | $\text{dHpmp} + \text{H}_2\text{O} \rightarrow \text{DHNPT} + \text{Pi}$                                                                                                   | Folate Metabolism       | SPBC14F5.13c                                                                                                        | 3.6.3.16              |
| Dihydroneopterin triphosphate pyrophosphatase                      | Cytosol               | $\text{AHDT} + \text{H}_2\text{O} \rightarrow \text{dHpmp} + \text{H} + \text{PPi}$                                                                                        | Folate Metabolism       |                                                                                                                     |                       |
| dihydropteroate synthase                                           | Mitochondria          | $2\text{AHHMD} + \text{PABA} \rightarrow \text{DHPT} + \text{PPi}$                                                                                                         | Folate Metabolism       | SPBC1734.03                                                                                                         | 4.1.2.25              |
| 5-formethyltetrahydrofolate cyclo-ligase                           | Cytosol               | $5\text{FTHF} + \text{ATP} \rightarrow \text{ADP} + \text{METHF} + \text{Pi}$                                                                                              | Folate Metabolism       | SPBC1703.08c                                                                                                        |                       |
| 5-formethyltetrahydrofolate cyclo-ligase                           | Mitochondria          | $5\text{FTHF} + \text{ATP} \rightarrow \text{ADP} + \text{METHF} + \text{Pi}$                                                                                              | Folate Metabolism       | SPBC1703.08c                                                                                                        | 6.3.3.2               |
| 5-Formyltetrahydrofolate:10-Formyltetrahydrofolate isomerase       | Cytosol               | $5\text{FTHF} + \text{ATP} + \text{H}_2\text{O} \rightarrow 10\text{FTHF} + \text{ADP} + \text{H} + \text{Pi}$                                                             | Folate Metabolism       |                                                                                                                     |                       |
| formate-tetrahydrofolate ligase                                    | Cytosol               | $\text{ATP} + \text{FORM} + \text{THF} \rightarrow 10\text{FTHF} + \text{ADP} + \text{Pi}$                                                                                 | Folate Metabolism       | SPBC839.16                                                                                                          | 6.3.4.3               |
| formate-tetrahydrofolate ligase                                    | Mitochondria          | $\text{ATP} + \text{FORM} + \text{THF} \rightarrow 10\text{FTHF} + \text{ADP} + \text{Pi}$                                                                                 | Folate Metabolism       | SPBC839.16                                                                                                          | 6.3.4.3               |
| GTP cyclohydrolase I                                               | Cytosol               | $\text{GTP} + \text{H}_2\text{O} \rightarrow \text{AHDT} + \text{FORM} + \text{H}$                                                                                         | Folate Metabolism       | SPAC17A5.13                                                                                                         | 3.5.4.16              |
| 2-amino-4-hydroxy-6-hydroxymethylidihydropteridine diphosphokinase | Mitochondria          | $2\text{AHHMP} + \text{ATP} \rightarrow 2\text{AHHMD} + \text{AMP} + \text{H}$                                                                                             | Folate Metabolism       | SPBC1734.03                                                                                                         | 4.1.2.25              |
| methylenetetrahydrofolate cyclohydrolase                           | Cytosol               | $\text{H}_2\text{O} + \text{METHF} \leftrightarrow 10\text{FTHF} + \text{H}$                                                                                               | Folate Metabolism       | SPBC839.16                                                                                                          | 6.3.4.3               |
| methylenetetrahydrofolate cyclohydrolase                           | Mitochondria          | $\text{H}_2\text{O} + \text{METHF} \leftrightarrow 10\text{FTHF} + \text{H}$                                                                                               | Folate Metabolism       | SPBC839.16                                                                                                          | 6.3.4.3               |
| methylenetetrahydrofolate dehydrogenase (NADP)                     | Cytosol               | $\text{MLTHF} + \text{NADP} \leftrightarrow \text{METHF} + \text{NADPH}$                                                                                                   | Folate Metabolism       | SPBC839.16                                                                                                          | 6.3.4.3               |
| methylenetetrahydrofolate dehydrogenase (NADP)                     | Mitochondria          | $\text{MLTHF} + \text{NADP} \leftrightarrow \text{METHF} + \text{NADPH}$                                                                                                   | Folate Metabolism       | SPBC839.16                                                                                                          | 6.3.4.3               |
| methylenetetrahydrofolate dehydrogenase (NAD)                      | Cytosol               | $\text{MLTHF} + \text{NAD} \rightarrow \text{METHF} + \text{NADH}$                                                                                                         | Folate Metabolism       | SPBC1711.04                                                                                                         | 1.5.1.15              |
| 5,10-methylenetetrahydrofolatereductase (NADPH)                    | Cytosol               | $2\text{ H} + \text{MLTHF} + \text{NADPH} \rightarrow 5\text{mTHF} + \text{NADP}$                                                                                          | Folate Metabolism       | SPAC56F8.10<br>SPAC343.10                                                                                           | 1.5.1.20              |
| quinolinate synthase                                               | Cytosol               | $\text{DHAP} + \text{IMASP} \rightarrow 2\text{ H}_2\text{O} + \text{Pi} + \text{Quin}$                                                                                    | Folate Metabolism       |                                                                                                                     |                       |
| tetrahydrofolate aminomethyltransferase                            | Mitochondria          | $\text{H}_2\text{O} + \text{METHF} \rightarrow 5\text{FTHF} + \text{H}$                                                                                                    | Folate Metabolism       | SPAC13G6.06c<br>SPAC31G5.14<br>SPBP19A11.01<br>SPAC26F1.03+SPBC30D10.13c                                            | 1.4.4.2,<br>2.1.2.10  |

|                                                         |                       |                                           |                                 |                                                     |                       |
|---------------------------------------------------------|-----------------------|-------------------------------------------|---------------------------------|-----------------------------------------------------|-----------------------|
| Tetrahydrofolate:L-glutamate gamma-ligase (ADP-forming) | Cytosol               | ATP + GLU + THF <> ADP + H + Pi + THFGLU  | Folate Metabolism               | SPAC227.09<br>SPBC1709.17                           | 6.3.2.17              |
| phosphomannomutase                                      | Nucleus               | man1p <> man6p                            | Fructose and Mannose Metabolism | SPAC1556.07                                         | 5.4.2.8               |
| mannose-6-phosphate isomerase                           | Nucleus               | man6p <> F6p                              | Fructose and Mannose Metabolism | SPBC2G2.16                                          | 5.3.1.8               |
| Fructose-2,6-bisphosphate 2-phosphatase                 | Cytosol               | f26bp + H2O -> F6P + Pi                   | Fructose and Mannose Metabolism | SPAC732.02c (main)<br>SPAPB17E12.14c<br>SPAC144.17c | 3.1.3.46              |
| fructose-1-phosphate kinase                             | Cytosol               | ATP + f1p -> ADP + FDP + H                | Fructose and Mannose Metabolism |                                                     |                       |
| mannose-1-phosphate guanylyltransferase                 | Cytosol               | GTP + H + man1p -> GDPmann + Ppi          | Fructose and Mannose Metabolism | SPCC1906.01                                         | 2.7.7.13              |
| mannose-6-phosphate isomerase                           | Cytosol               | man6p <> F6p                              | Fructose and Mannose Metabolism | SPBC2G2.16                                          | 5.3.1.8               |
| 6-phosphofructo-2-kinase                                | Cytosol               | ATP + F6P -> ADP + f26bp + H              | Fructose and Mannose Metabolism | SPAPB17E12.14c<br>SPAC222.13c                       | 2.7.1.105             |
| phosphomannomutase                                      | Cytosol               | man1p <> man6p                            | Fructose and Mannose Metabolism | SPAC1556.07                                         | 5.4.2.8               |
|                                                         | Extracellular         | raffin + H2O -> melib + fru               | Galactose metabolism            | SPCC191.11                                          | 3.2.1.26              |
|                                                         | Cytosol               | raffin + H2O -> melib + fru               | Galactose metabolism            | SPAC8E11.01c                                        | 3.2.1.26              |
|                                                         | Cytosol               | sta + H2O -> mant + fru                   | Galactose metabolism            | SPAC8E11.01c                                        | 3.2.1.26              |
|                                                         | Endoplasmic Reticulum | sta + H2O -> raffin + gal                 | Galactose metabolism            | SPAC869.07c                                         | 3.2.1.22              |
|                                                         | Extracellular         | sta + H2O -> raffin + gal                 | Galactose metabolism            | SPAC869.07c                                         | 3.2.1.22              |
|                                                         | Endoplasmic Reticulum | mant + H2O -> gal + melib                 | Galactose metabolism            | SPAC869.07c                                         | 3.2.1.22              |
|                                                         | Extracellular         | mant + H2O -> gal + melib                 | Galactose metabolism            | SPAC869.07c                                         | 3.2.1.22              |
| 1-alpha-D-Galactosyl-myo-inositol galactohydrolase      | Endoplasmic Reticulum | GALI + H2O <> inost + gal                 | Galactose metabolism            | SPAC869.07c                                         | 3.2.1.22              |
| 1-alpha-D-Galactosyl-myo-inositol galactohydrolase      | Extracellular         | GALI + H2O <> inost + gal                 | Galactose metabolism            | SPAC869.07c                                         | 3.2.1.22              |
| Melibititol galactohydrolase                            | Endoplasmic Reticulum | melt + H2O <> sbt-D + gal                 | Galactose metabolism            | SPAC869.07c                                         | 3.2.1.22              |
| Melibititol galactohydrolase                            | Extracellular         | melt + H2O <> sbt-D + gal                 | Galactose metabolism            | SPAC869.07c                                         | 3.2.1.22              |
| EPimelibiose galactohydrolase                           | Endoplasmic Reticulum | emp + H2O <> man + gal                    | Galactose metabolism            | SPAC869.07c                                         | 3.2.1.22              |
| EPimelibiose galactohydrolase                           | Extracellular         | emp + H2O <> man + gal                    | Galactose metabolism            | SPAC869.07c                                         | 3.2.1.22              |
| Galactosylglycerol galactohydrolase                     | Endoplasmic Reticulum | ggl + H2O <> gal + GLYC                   | Galactose metabolism            | SPAC869.07c                                         | 3.2.1.22              |
| Galactosylglycerol galactohydrolase                     | Extracellular         | ggl + H2O <> gal + GLYC                   | Galactose metabolism            | SPAC869.07c                                         | 3.2.1.22              |
| alpha-D-glucoside glucohydase                           | Nucleus               | 6dg + H2O -> gal + GLC                    | Galactose metabolism            | SPBC1683.07<br>SPAC1039.11c<br>SPAPB24D3.10c        | 3.2.1.20              |
| UTP-glucose-1-phosphate URIdylyltransferase             | Nucleus               | g1p + H + UTP <> Ppi + UDPg               | Galactose metabolism            | SPCC794.10<br>SPCC1322.04                           | 2.7.7.9               |
| galactose-1-phosphate URIdylyltransferase               | Nucleus               | gal1p + H + UTP <> Ppi + UDPgal           | Galactose metabolism            | SPBPB2B2.10c                                        | 2.7.7.12              |
| UDPglucose--hexose-1-phosphate URIdylyltransferase      | Nucleus               | gal1p + UDPg <> g1p + UDPgal              | Galactose metabolism            | SPBPB2B2.10c                                        | 2.7.7.12              |
| alpha-glucosidase                                       | Nucleus               | H2O + MALT -> 2 GLC                       | Galactose metabolism            | SPBC1683.07<br>SPAC1039.11c<br>SPAPB24D3.10c        | 3.2.1.20              |
| UDPglucose 4-ePimerase                                  | Nucleus               | UDPg <> UDPgal                            | Galactose metabolism            | SPBPB2B2.12c<br>SPBC365.14c                         | 5.1.3.3               |
| alpha-D-glucoside glucohydase                           | Cytosol               | 6dg + H2O -> gal + GLC                    | Galactose metabolism            | SPBC1683.07<br>SPAC1039.11c<br>SPAPB24D3.10c        | 3.2.1.20              |
| EPimelibiose galactohydrolase                           | Cytosol               | epm + H2O <> gal + man                    | Galactose metabolism            | SPAC869.07c                                         |                       |
| 1-alpha-D-Galactosyl-myo-inositol galactokinase         | Cytosol               | GALI + H2O <> gal + inost                 | Galactose metabolism            | SPAC869.07c                                         |                       |
| galactokinase                                           | Cytosol               | ATP + gal -> ADP + gal1p + H              | Galactose metabolism            | SPBPB2B2.13                                         | 2.7.1.6               |
| a-galactosidase (melibiose)                             | Cytosol               | H2O + melib -> gal + GLC                  | Galactose metabolism            | SPAC869.07c                                         |                       |
| galactose-1-phosphate URIdylyltransferase               | Cytosol               | gal1p + H + UTP <> Ppi + UDPgal           | Galactose metabolism            | SPBPB2B2.10c                                        | 2.7.7.12              |
| UTP-glucose-1-phosphate URIdylyltransferase             | Cytosol               | g1p + H + UTP <> Ppi + UDPg               | Galactose metabolism            | SPCC794.10<br>SPCC1322.04                           | 2.7.7.9               |
| Galactosylglycerol galactohydrolase                     | Cytosol               | ggl + H2O <> gal + GLYC                   | Galactose metabolism            | SPAC869.07c                                         |                       |
| alpha-glucosidase                                       | Cytosol               | H2O + MALT -> 2 GLC                       | Galactose metabolism            | SPBC1683.07<br>SPAC1039.11c<br>SPAPB24D3.10c        | 3.2.1.20              |
| Melibititol galactohydrolase                            | Cytosol               | melt + H2O <> sbt-D + gal                 | Galactose metabolism            | SPAC869.07c                                         |                       |
| Raffinose galactohydrolase                              | Extracellular         | raffin + H2O -> gal + suc                 | Galactose metabolism            | SPAC869.07c                                         | 3.2.1.22              |
| Raffinose galactohydrolase                              | Endoplasmic Reticulum | raffin + H2O -> gal + suc                 | Galactose metabolism            | SPAC869.07c                                         | 3.2.1.22              |
| UDPglucose 4-ePimerase                                  | Cytosol               | UDPg <> UDPgal                            | Galactose metabolism            | SPBPB2B2.12c<br>SPBC365.14c                         | 5.1.3.3               |
| UDPglucose--hexose-1-phosphate URIdylyltransferase      | Cytosol               | gal1p + UDPg <> g1p + UDPgal              | Galactose metabolism            | SPBPB2B2.10c                                        | 2.7.7.12              |
| 4-aminobutyrate transaminase                            | Mitochondria          | 4abut + AKG -> GLU + SUCSAL               | Glutamate metabolism            | SPAC19D5.07                                         | 2.6.1.19              |
| glutamate synthase (NADH2)                              | Mitochondria          | AKG + GLN + H + NADH -> 2 GLU + NAD       | Glutamate metabolism            | SPAPB1E7.07                                         | 1.4.1.13,<br>1.4.1.14 |
| glutamate dehydrogenase (NADP)                          | Mitochondria          | AKG + H + NADPH + NH4 -> GLU + H2O + NADP | Glutamate metabolism            | SPCC622.12c                                         | 1.4.1.4               |
| chitin synthase                                         | Cytoplasm             | UDPacgal -> cHitin + H + UDP              | Glutamate metabolism            | SPAC19G12.03                                        | 2.4.1.16              |
| chitin synthase                                         | Endoplasmic Reticulum | UDPacgal -> cHitin + H + UDP              | Glutamate metabolism            | SPAC13G6.12c<br>SPBC1709.01                         | 2.4.1.16              |
| UDP-N-acetylglucosamine diphosphorylase                 | Nucleus               | acgam1p + H + UTP <> Ppi + UDPacgal       | Glutamate metabolism            | SPBC1289.08                                         | 2.7.7.23              |
| phosphoacetylglucosamine mutase                         | Nucleus               | acgam6p <> acgam1p                        | Glutamate metabolism            | SPAC1296.01c<br>SPAC13C5.05c                        | 5.4.2.3               |
| glutamate dehydrogenase (NADP)                          | Nucleus               | AKG + H + NADPH + NH4 -> GLU + H2O + NADP | Glutamate metabolism            | SPCC622.12c                                         | 1.4.1.4               |
| phosphoglucosamine mutase                               | Nucleus               | gam1p <> gam6p                            | Glutamate metabolism            | SPAC1296.01c<br>SPAC13C5.05c<br>SPBC17A3.07         | 5.4.2.3               |
| glutathione oxidoreductase                              | Nucleus               | GTHox + H + NADPH -> 2 GTHrd + NADP       | Glutamate metabolism            | SPAC4F10.20<br>SPBC26H8.06                          | 1.8.1.7               |
| 4-aminobutyrate transaminase                            | Cytosol               | 4abut + AKG -> GLU + SUCSAL               | Glutamate metabolism            | SPAC19D5.07                                         | 2.6.1.19              |
| phosphoacetylglucosamine mutase                         | Cytosol               | acgam6p <> acgam1p                        | Glutamate metabolism            | SPAC1296.01c<br>SPAC13C5.05c                        | 5.4.2.3               |
| glucosamine-6-phosphate deaminase                       | Cytosol               | gam6p + H2O -> F6P + NH4                  | Glutamate metabolism            |                                                     |                       |
| glutamate dehydrogenase (NAD)                           | Cytosol               | GLU + H2O + NAD -> AKG + H + NADH + NH4   | Glutamate metabolism            | SPCC132.04c                                         | 1.4.1.2               |
| glutamate dehydrogenase (NADP)                          | Cytosol               | AKG + H + NADPH + NH4 -> GLU + H2O + NADP | Glutamate metabolism            | SPCC622.12c                                         | 1.4.1.4               |
| glutamate synthase (NADH2)                              | Cytosol               | AKG + GLN + H + NADH -> 2 GLU + NAD       | Glutamate metabolism            | SPAPB1E7.07                                         | 1.4.1.13,<br>1.4.1.14 |
| glutathione oxidoreductase                              | Mitochondria          | GTHox + H + NADPH -> 2 GTHrd + NADP       | Glutamate metabolism            | SPBC17A3.07                                         | 1.8.1.7               |
| glutathione peroxidase                                  | Mitochondria          | 2 GTHrd + H2O2 <> GTHox + 2 H2O           | Glutamate metabolism            | SPAPB2B4.02                                         |                       |
| 1-pyrroline-5-carboxylate dehydrogenase                 | Mitochondria          | 1PYR5c + 2 H2O + NAD -> GLU + H + NADH    | Glutamate metabolism            |                                                     |                       |
| phosphoglucosamine mutase                               | Cytosol               | gam1p <> gam6p                            | Glutamate metabolism            | SPAC1296.01c<br>SPAC13C5.05c                        | 5.4.2.3               |
| D1-pyrroline-5-carboxylate dehydrogenase                | Mitochondria          | GLU5SA + H2O + NADP -> GLU + 2 H + NADPH  | Glutamate metabolism            | SPBC24C6.04                                         |                       |
| succinate-semialdehyde dehydrogenase (NADP) (predicted) | Cytosol               | H2O + NADP + SUCSAL -> 2 H + NADPH + SUCC | Glutamate metabolism            | SPAC1002.12c<br>SPAC139.05                          |                       |
| UDP-N-acetylglucosamine diphosphorylase                 | Cytosol               | acgam1p + H + UTP <> Ppi + UDPacgal       | Glutamate metabolism            | SPBC1289.08                                         | 2.7.7.23              |
| N-acetylglucosamine-6-phosphate synthase                | Cytosol               | acCoA + gam6p <> acgam6p + CoA + H        | Glutamate metabolism            | SPAC16E8.03                                         |                       |

|                                                                   |                       |                                                                                                                                                     |                                |                                                             |                                  |
|-------------------------------------------------------------------|-----------------------|-----------------------------------------------------------------------------------------------------------------------------------------------------|--------------------------------|-------------------------------------------------------------|----------------------------------|
| glutamine synthetase                                              | Nucleus               | ATP + GLU + NH4 -> ADP + GLN + H + Pi                                                                                                               | Glutamine Metabolism           | SPAC23H4.06                                                 | 6.3.1.2                          |
| anthranilate synthase                                             | Cytosol               | CHOR + GLN -> anth + GLU + H + PYR                                                                                                                  | Glutamine Metabolism           | SPBC1539.09e<br>SPCC1442.09                                 |                                  |
| glutamine-fructose-6-phosphate transaminase                       | Cytosol               | F6P + GLN -> gam6p + GLU                                                                                                                            | Glutamine Metabolism           | SPBC12C2.11                                                 | 2.6.1.16                         |
| glutamine synthetase                                              | Cytosol               | ATP + GLU + NH4 -> ADP + GLN + H + Pi                                                                                                               | Glutamine Metabolism           | SPAC23H4.06                                                 | 6.3.1.2                          |
| glutamine                                                         | Cytosol               | GLN + H2O -> GLU + NH4                                                                                                                              | Glutamine Metabolism           |                                                             | 3.5.1.2                          |
| Glycerol dehydrogenase (NADP-dependent)                           | Mitochondria          | GLYC + NADP -> DHA + H + NADPH                                                                                                                      | Glycerolipid Metabolism        | SPAC13F5.03c                                                | 1.1.1.6                          |
| triglycerol synthesis                                             | Endoplasmic Reticulum | 0.01 12dgr + 0.02 C100CoA + 0.06 C120CoA + 0.17 C161CoA + 0.09 C182CoA + 0.24 C181CoA + 0.27 C160CoA + 0.05 C180CoA + 0.1 C140CoA -> CoA + 0.01 TAG | Glycerolipid Metabolism        | SPAC13G7.05<br>SPCP1E11.05                                  | 2.3.1.26                         |
| phosphatidylcholine-diacylglycerol acyltransferase                | Endoplasmic Reticulum | 12dgr + pc -> 1agpc + TAG                                                                                                                           | Glycerolipid Metabolism        | SPBC776.14<br>SPCC1235.15<br>SPCC1840.04                    | 2.3.1.158                        |
| glycerol-3-phosphate dehydrogenase (NAD)                          | Nucleus               | DHAP + H + NADH -> GLYC3p + NAD                                                                                                                     | Glycerolipid Metabolism        | SPBC215.05                                                  | 1.1.1.8                          |
| dihydroxyacetone kinase                                           | Cytosol               | ATP + DHA -> ADP + DHAP + H                                                                                                                         | Glycerolipid Metabolism        | SPAC22A12.11<br>SPAC977.16c                                 | 2.7.1.29                         |
| glycerol-3-phosphate dehydrogenase (NAD)                          | Cytosol               | DHAP + H + NADH -> GLYC3p + NAD                                                                                                                     | Glycerolipid Metabolism        | SPAC23D3.04c<br>SPBC215.05                                  | 1.1.1.8                          |
| glycerol-3-phosphate dehydrogenase (FAD)                          | Mitochondria          | fad + GLYC3p -> DHAP + FADH2                                                                                                                        | Glycerolipid Metabolism        | SPCC1223.03c                                                | 1.1.5.3                          |
| glycerol-3-phosphatase                                            | Cytosol               | GLYC3p + H2O -> GLYC + Pi                                                                                                                           | Glycerolipid Metabolism        |                                                             |                                  |
| glycerol kinase                                                   | Cytosol               | ATP + GLYC -> ADP + GLYC3p + H                                                                                                                      | Glycerolipid Metabolism        |                                                             |                                  |
| Glycerophosphodiester phosphodiesterase (Glycerophosphocholine)   | Endoplasmic Reticulum | G3Pc + H2O -> CHOL + GLYC3p + H                                                                                                                     | Glycerophospholipid Metabolism | SPAC4D7.02c                                                 | 3.1.4.46                         |
| Glycerophosphodiester phosphodiesterase (Glycerophosphocholine)   | Mitochondria          | G3Pc + H2O -> CHOL + GLYC3p + H                                                                                                                     | Glycerophospholipid Metabolism | SPAC4D7.02c                                                 | 3.1.4.46                         |
| Triacylglycerol lipase                                            | Cytosol               | H2O + 0.01 TAG -> 0.01 12dgr + 0.02 C100 + 0.06 C120 + H + 0.27 C160 + 0.17 C161 + 0.05 C180 + 0.24 C181 + 0.09 C182 + 0.1 C140                     | Glycerolipid Metabolism        | SPCC1450.16c                                                | 3.1.1.3                          |
| Alanine glyoxylate aminotransferase                               | Cytosol               | ALA + GLX -> GLY + PYR                                                                                                                              | Glycine and Serine Metabolism  |                                                             |                                  |
| glycine-cleavage complex (lipoamide)                              | Mitochondria          | GLY + H + lpam <> alpam + CO2                                                                                                                       | Glycine and Serine Metabolism  | SPAC13G6.06c<br>SPAC1002.09c<br>SPAC31G5.14<br>SPBP19A11.01 | 1.4.4.2,<br>1.8.1.4,<br>2.1.2.10 |
| glycine-cleavage system (lipoamide)                               | Mitochondria          | alpam + THF -> dHlam + MLTHF + NH4                                                                                                                  | Glycine and Serine Metabolism  | SPAC13G6.06c<br>SPAC1002.09c<br>SPAC31G5.14<br>SPBP19A11.01 | 1.4.4.2,<br>1.8.1.4,<br>2.1.2.10 |
| glycine-cleavage complex (lipoamide)                              | Mitochondria          | dHlam + NAD <> H + lpam + NADH                                                                                                                      | Glycine and Serine Metabolism  | SPAC13G6.06c<br>SPAC1002.09c<br>SPAC31G5.14<br>SPBP19A11.01 | 1.4.4.2,<br>1.8.1.4,<br>2.1.2.10 |
| glycine-cleavage complex (lipoylprotein)                          | Mitochondria          | GLY + H + lpro <> alpro + CO2                                                                                                                       | Glycine and Serine Metabolism  | SPAC13G6.06c<br>SPAC1002.09c<br>SPAC31G5.14<br>SPBP19A11.01 | 1.4.4.2,<br>1.8.1.4,<br>2.1.2.10 |
| glycine-cleavage complex (lipoylprotein)                          | Mitochondria          | alpro + THF -> dHlpro + MLTHF + NH4                                                                                                                 | Glycine and Serine Metabolism  | SPAC13G6.06c<br>SPAC1002.09c<br>SPAC31G5.14<br>SPBP19A11.01 | 1.4.4.2,<br>1.8.1.4,<br>2.1.2.10 |
| glycine-cleavage complex (lipoylprotein)                          | Mitochondria          | dHlpro + NAD <> H + lpro + NADH                                                                                                                     | Glycine and Serine Metabolism  | SPAC13G6.06c<br>SPAC1002.09c<br>SPAC31G5.14<br>SPBP19A11.01 | 1.4.4.2,<br>1.8.1.4,<br>2.1.2.10 |
| glycine hydroxymethyltransferase                                  | Cytosol               | SER + THF <> GLY + H2O + MLTHF                                                                                                                      | Glycine and Serine Metabolism  | SPAC24C9.12c                                                | 2.1.2.1                          |
| glycine hydroxymethyltransferase                                  | Mitochondria          | SER + THF <> GLY + H2O + MLTHF                                                                                                                      | Glycine and Serine Metabolism  | SPAC18G6.04c                                                | 2.1.2.1                          |
| glycine cleavage system                                           | Mitochondria          | GLY + NAD + THF -> CO2 + MLTHF + NADH + NH4                                                                                                         | Glycine and Serine Metabolism  | SPAC13G6.06c<br>SPAC1002.09c<br>SPAC31G5.14<br>SPBP19A11.01 | 1.4.4.2,<br>1.8.1.4,<br>2.1.2.10 |
| homoserine dehydrogenase (NADH)                                   | Cytosol               | aspSA + H + NADH -> Hom-L + NAD                                                                                                                     | Glycine and Serine Metabolism  | SPBC776.03                                                  | 1.1.1.3                          |
| homoserine dehydrogenase (NADP)                                   | Cytosol               | aspSA + H + NADPH -> Hom-L + NADP                                                                                                                   | Glycine and Serine Metabolism  | SPBC776.03                                                  | 1.1.1.3                          |
| homoserine kinase                                                 | Cytosol               | ATP + Hom-L -> ADP + H + PHOM                                                                                                                       | Glycine and Serine Metabolism  | SPBC4C3.03                                                  | 2.7.1.39                         |
| L-serine dehydrogenase                                            | Cytosol               | NADP + SER <> 2amSA + H + NADPH                                                                                                                     | Glycine and Serine Metabolism  | SPAC521.03                                                  |                                  |
| phosphoglycerate dehydrogenase                                    | Cytosol               | 3pg + NAD -> 3pHp + H + NADH                                                                                                                        | Glycine and Serine Metabolism  | SPCC364.07                                                  | 1.1.1.95                         |
| phosphoserine transaminase                                        | Cytosol               | 3pHp + GLU -> AKG + PSER                                                                                                                            | Glycine and Serine Metabolism  | SPAC1F12.07                                                 | 2.6.1.52                         |
| phosphoserine phosphatase (L-serine)                              | Cytosol               | H2O + PSER -> Pi + SER                                                                                                                              | Glycine and Serine Metabolism  | SPBC3H7.07c                                                 | 3.1.3.3                          |
| L-serine deaminase                                                | Cytosol               | SER -> NH4 + PYR                                                                                                                                    | Glycine and Serine Metabolism  | SPBC1677.03c                                                | 4.3.1.19                         |
| Diphosphoglyceromutase                                            | Nucleus               | 13dpg <> 23dpg + H                                                                                                                                  | Glycolysis/Gluconeogenesis     | SPAC26F1.06<br>SPAC1687.21                                  | 5.4.2.1                          |
| phosphoglycerate mutase                                           | Nucleus               | 2pg <> 3pg                                                                                                                                          | Glycolysis/Gluconeogenesis     | SPAC26F1.06                                                 | 5.4.2.1                          |
| enolase                                                           | Nucleus               | 2pg <> H2O + PEP                                                                                                                                    | Glycolysis/Gluconeogenesis     | SPBC1815.01<br>SPBPB21E7.01c                                | 4.2.1.11                         |
| phosphoglycerate kinase                                           | Nucleus               | 3pg + ATP <> 13dpg + ADP                                                                                                                            | Glycolysis/Gluconeogenesis     | SPBC14F5.04c                                                | 2.7.2.3                          |
| hexokinase (D-fructose:ATP)                                       | Nucleus               | ATP + fru -> ADP + F6P + H                                                                                                                          | Glycolysis/Gluconeogenesis     | SPAC24H6.04                                                 | 2.7.1.1                          |
| hexokinase (D-glucose:ATP)                                        | Nucleus               | ATP + GLC -> ADP + G6P + H                                                                                                                          | Glycolysis/Gluconeogenesis     | SPAC4F8.07c<br>SPAC24H6.04                                  | 2.7.1.1                          |
| Glucokinase                                                       | Nucleus               | ATP + GLC -> ADP + G6P-B + H                                                                                                                        | Glycolysis/Gluconeogenesis     | SPAC4F8.07c                                                 | 2.7.1.1                          |
| hexokinase (D-mannose:ATP)                                        | Nucleus               | ATP + man -> ADP + H + man6p                                                                                                                        | Glycolysis/Gluconeogenesis     | SPAC24H6.04                                                 | 2.7.1.1                          |
| triose-phosphate isomerase                                        | Nucleus               | DHAP <> G3P                                                                                                                                         | Glycolysis/Gluconeogenesis     | SPCC24B10.21                                                | 5.3.1.1                          |
| D-Fructose 1-phosphate D-glyceraldehyde-3-phosphate-lyase         | Nucleus               | f1p <> DHAP + GLYald                                                                                                                                | Glycolysis/Gluconeogenesis     | SPBC19C2.07                                                 | 4.1.2.13                         |
| fructose-bisphosphate aldolase                                    | Nucleus               | FDP <> DHAP + G3P                                                                                                                                   | Glycolysis/Gluconeogenesis     | SPBC19C2.07                                                 | 4.1.2.13                         |
| Sedoheptulose 1,7-bisphosphate D-glyceraldehyde-3-phosphate-lyase | Nucleus               | s17bp <> DHAP + E4P                                                                                                                                 | Glycolysis/Gluconeogenesis     | SPBC19C2.07                                                 | 4.1.2.13                         |
| Diphosphoglyceromutase                                            | Cytosol               | 13dpg <> 23dpg + H                                                                                                                                  | Glycolysis/Gluconeogenesis     | SPAC26F1.06<br>SPAC1687.21                                  | 5.4.2.1                          |
| enolase                                                           | Cytosol               | 2pg <> H2O + PEP                                                                                                                                    | Glycolysis/Gluconeogenesis     | SPBC1815.01                                                 | 4.2.1.11                         |
| fructose-bisphosphate aldolase                                    | Cytosol               | FDP <> DHAP + G3P                                                                                                                                   | Glycolysis/Gluconeogenesis     | SPBC19C2.07                                                 | 4.1.2.13                         |
| D-Fructose 1-phosphate D-glyceraldehyde-3-phosphate-lyase         | Cytosol               | f1p <> DHAP + GLYald                                                                                                                                | Glycolysis/Gluconeogenesis     | SPBC19C2.07                                                 | 4.1.2.13                         |
| Sedoheptulose 1,7-bisphosphate D-glyceraldehyde-3-phosphate-lyase | Cytosol               | s17bp <> DHAP + E4P                                                                                                                                 | Glycolysis/Gluconeogenesis     | SPBC19C2.07                                                 | 4.1.2.13                         |
| Glucose-6-phosphate isomerase                                     | Cytosol               | G6P <> G6P-B                                                                                                                                        | Glycolysis/Gluconeogenesis     | SPBC1604.05                                                 | 5.3.1.9                          |
| Glucose-6-phosphate isomerase                                     | Cytosol               | G6P-B <> F6P                                                                                                                                        | Glycolysis/Gluconeogenesis     | SPBC1604.05                                                 | 5.3.1.9                          |
| glyceraldehyde-3-phosphate dehydrogenase                          | Cytosol               | G3P + NAD + Pi <> 13dpg + H + NADH                                                                                                                  | Glycolysis/Gluconeogenesis     | SPBC32F12.11<br>SPBC354.12                                  | 1.2.1.12                         |
| Glucokinase                                                       | Cytosol               | ATP + GLC -> ADP + G6P-B + H                                                                                                                        | Glycolysis/Gluconeogenesis     | SPAC4F8.07c                                                 | 2.7.1.1                          |
| hexokinase (D-glucose:ATP)                                        | Cytosol               | ATP + GLC -> ADP + G6P + H                                                                                                                          | Glycolysis/Gluconeogenesis     | SPAC4F8.07c<br>SPAC24H6.04                                  | 2.7.1.1                          |
| hexokinase (D-mannose:ATP)                                        | Cytosol               | ATP + man -> ADP + H + man6p                                                                                                                        | Glycolysis/Gluconeogenesis     | SPAC24H6.04                                                 | 2.7.1.1                          |
| hexokinase (D-fructose:ATP)                                       | Cytosol               | ATP + fru -> ADP + F6P + H                                                                                                                          | Glycolysis/Gluconeogenesis     | SPAC24H6.04                                                 | 2.7.1.1                          |
| pyruvate dehydrogenase (dihydropyruvate dehydrogenase)            | Mitochondria          | dHlam + NAD -> H + lpam + NADH                                                                                                                      | Glycolysis/Gluconeogenesis     | SPBC3H7.03c<br>SPAC1002.09c<br>SPBC776.15c                  | 1.2.4.2,<br>1.8.1.4,<br>2.3.1.61 |

|                                                                                                    |                       |                                                      |                            |                                                                            |                                        |
|----------------------------------------------------------------------------------------------------|-----------------------|------------------------------------------------------|----------------------------|----------------------------------------------------------------------------|----------------------------------------|
| pyruvate dehydrogenase                                                                             | Mitochondria          | CoA + NAD + PYR -> ACCoA + CO2 + NADH                | Glycolysis/Gluconeogenesis | SPAC1002.09c<br>SPCC794.07<br>SPBC30D10.13c<br>SPAC26F1.03<br>SPCC1259.09c | 1.8.1.4,<br>2.3.1.12,<br>1.2.4.1       |
| phosphofructokinase                                                                                | Cytosol               | ATP + F6P -> ADP + FDP + H                           | Glycolysis/Gluconeogenesis | SPBC16H5.02                                                                | 2.7.1.11                               |
| Phosphofructokinase                                                                                | Cytosol               | ATP + taG6P-D -> ADP + H + taGDP-D                   | Glycolysis/Gluconeogenesis | SPBC16H5.02                                                                | 2.7.1.11                               |
| phosphofructokinase (s7p)                                                                          | Cytosol               | ATP + s7p -> ADP + H + s17bp                         | Glycolysis/Gluconeogenesis | SPBC16H5.02                                                                | 2.7.1.11                               |
| glucose-6-phosphate isomerase                                                                      | Cytosol               | G6P <-> F6P                                          | Glycolysis/Gluconeogenesis | SPBC1604.05                                                                | 5.3.1.9                                |
| phosphoglycerate kinase                                                                            | Cytosol               | 13dpG + ADP <-> 3pg + ATP                            | Glycolysis/Gluconeogenesis | SPBC14F5.04c                                                               | 2.7.2.3                                |
| phosphoglycerate mutase                                                                            | Cytosol               | 3pg <-> 2pg                                          | Glycolysis/Gluconeogenesis | SPAC26F1.06                                                                | 5.4.2.1                                |
| pyruvate kinase                                                                                    | Cytosol               | ADP + H + PEP -> ATP + PYR                           | Glycolysis/Gluconeogenesis | SPAC4H3.10c                                                                | 2.7.1.40                               |
| triose-phosphate isomerase                                                                         | Cytosol               | DHAP <-> G3P                                         | Glycolysis/Gluconeogenesis | SPCC24B10.21<br>SPAC13A11.06<br>SPAC3G9.11c<br>SPAC186.09<br>SPAC1F8.07c   | 5.3.1.1<br>4.1.1.1                     |
| pyruvate decarboxylase                                                                             | Cytosol               | PYR + H -> ACAL + CO2                                | Glycolysis/Gluconeogenesis | SPAC186.09<br>SPAC1F8.07c                                                  | 4.1.1.1                                |
| Dolichol kinase                                                                                    | Cytosol               | CTP + dolichol -> CDP + dolp + H                     | Glycoprotein Metabolism    | SPCC63.10c                                                                 | 2.7.1.108                              |
| Dolichol kinase                                                                                    | Endoplasmic Reticulum | CTP + dolichol -> CDP + dolp + H                     | Glycoprotein Metabolism    | SPCC63.10c                                                                 | 2.7.1.108                              |
| Dolichyl-phosphate-mannose--protein mannosyltransferase                                            | Endoplasmic Reticulum | dolmanp -> dolp + H + mannan                         | Glycoprotein Metabolism    | SPAC22A12.07c<br>SPAPB1E7.09<br>SPBC16C6.09                                | 2.4.1.109                              |
| Dolichyl-phosphate D-mannosyltransferase                                                           | Endoplasmic Reticulum | dolp[c] + GDPmann[c] -> dolmanp[r] + GDP[c]          | Glycoprotein Metabolism    | SPAC31G5.16c<br>SPBC21B10.11<br>SPBC1677.02                                | 2.4.1.83                               |
| Glycolipid 1,2-alpha-D-mannosyltransferase                                                         | Golgi apparatus       | GDPmann + m2macCHITPpdol -> GDP + H + M3MACCHITPPDOL | Glycoprotein Metabolism    | SPBC19C7.12c<br>SPBC1773.08c<br>SPBC19C7.12c<br>SPBC1773.08c               |                                        |
| Glycolipid 1,2-alpha-D-mannosyltransferase                                                         | Golgi apparatus       | GDPmann + M3MACCHITPPDOL -> GDP + H + m4macCHITPpdol | Glycoprotein Metabolism    |                                                                            |                                        |
| Glycolipid 1,3-alpha-D-mannosyltransferase                                                         | Golgi apparatus       | GDPmann + macCHITPpdol -> GDP + H + m1macCHITPpdol   | Glycoprotein Metabolism    |                                                                            |                                        |
| Glycolipid 1,6-alpha-D-mannosyltransferase                                                         | Golgi apparatus       | GDPmann + m1macCHITPpdol -> GDP + H + m2macCHITPpdol | Glycoprotein Metabolism    |                                                                            |                                        |
| Ureidoglycolate hydrolase                                                                          | Nucleus               | 2 H + H2O + URDGLYC <-> CO2 + GLX + 2 NH4            | Histidine Metabolism       | SPAC19G12.04                                                               | 3.5.3.19                               |
| Allantoate amidinohydrolase                                                                        | Nucleus               | allt + H2O <-> URDGLYC + urea                        | Histidine Metabolism       | SPAC1F7.09c                                                                | 3.5.3.4                                |
| hnRNP arginine N-methyltransferase                                                                 | Nucleus               | SAM + HIS -> NPmeHis + SAH + H                       | Histidine Metabolism       | SPAC890.07c                                                                | 2.1.1.-                                |
| phosphoribosylpyrophosphate synthetase                                                             | Nucleus               | ATP + R5P <-> AMP + H + PRPP                         | Histidine Metabolism       | SPAC4A8.14                                                                 | 2.7.6.1                                |
| imidazoleglycerol-phosphate dehydratase                                                            | Nucleus               | eiG3P -> H2O + imacp                                 | Histidine Metabolism       | SPBC21H7.07c                                                               | 4.2.1.19                               |
| histidinol-phosphate transaminase                                                                  | Nucleus               | GLU + imacp -> AKG + Hisp                            | Histidine Metabolism       | SPBC11B10.02c                                                              | 2.6.1.9                                |
| 1-(5-phosphoribosyl)-5-[(5-phosphoribosylamino)methylideneamino]imidazol e-4-carboxamide isomerase | Nucleus               | prfp -> prlp                                         | Histidine Metabolism       | SPAC3F10.09                                                                | 5.3.1.16                               |
| Allantoate amidinohydrolase                                                                        | Cytosol               | allt + H2O <-> URDGLYC + urea                        | Histidine Metabolism       | SPAC1F7.09c                                                                | 3.5.3.4                                |
| hnRNP arginine N-methyltransferase                                                                 | Cytosol               | SAM + HIS -> NPmeHis + SAH + H                       | Histidine Metabolism       | SPAC890.07c                                                                | 2.1.1.-                                |
| ATP phosphoribosyltransferase                                                                      | Cytosol               | ATP + PRPP -> PPI + prbATP                           | Histidine Metabolism       | SPAC25G10.05c                                                              | 2.4.2.17                               |
| histidinol dehydrogenase                                                                           | Cytosol               | H2O + Histd + 2 NAD -> 3 H + HIS + 2 NADH            | Histidine Metabolism       | SPBC29A3.02c<br>SPBC1711.13                                                | 1.1.1.23                               |
| histidinol dehydrogenase                                                                           | Nucleus               | H2O + Histd + 2 NAD -> 3 H + HIS + 2 NADH            | Histidine Metabolism       | SPBC29A3.02c<br>SPBC1711.13                                                | 1.1.1.23                               |
| histidinol-phosphate transaminase                                                                  | Cytosol               | GLU + imacp -> AKG + Hisp                            | Histidine Metabolism       | SPBC11B10.02c                                                              | 2.6.1.9                                |
| imidazoleglycerol-phosphate dehydratase                                                            | Cytosol               | eiG3P -> H2O + imacp                                 | Histidine Metabolism       | SPBC21H7.07c                                                               | 4.2.1.19                               |
| phosphoribosyl-AMP cyclohydrolase                                                                  | Cytosol               | H2O + prbAMP -> prfp                                 | Histidine Metabolism       | SPBC29A3.02c<br>SPBC1711.13                                                | 3.5.4.19,<br>3.6.1.31                  |
| phosphoribosyl-ATP pyrophosphatase                                                                 | Cytosol               | H2O + prbATP -> H + PPI + prbAMP                     | Histidine Metabolism       | SPBC1711.13<br>SPBC29A3.02c                                                | 3.5.4.19,<br>3.6.1.31                  |
| phosphoribosyl-AMP cyclohydrolase                                                                  | Nucleus               | H2O + prbAMP -> prfp                                 | Histidine Metabolism       | SPBC1711.13                                                                | 3.6.1.31                               |
| phosphoribosyl-ATP pyrophosphatase                                                                 | Nucleus               | H2O + prbATP -> H + PPI + prbAMP                     | Histidine Metabolism       | SPBC29A3.02c<br>SPBC1711.13                                                | 3.5.4.19,<br>3.6.1.31                  |
| 1-(5-phosphoribosyl)-5-[(5-phosphoribosylamino)methylideneamino]imidazol e-4-carboxamide isomerase | Cytosol               | prfp -> prlp                                         | Histidine Metabolism       | SPAC3F10.09                                                                | 5.3.1.16                               |
| phosphoribosylpyrophosphate synthetase                                                             | Cytosol               | ATP + R5P <-> AMP + H + PRPP                         | Histidine Metabolism       | SPCC1620.06c<br>SPAC4A8.14<br>SPBC3D6.06c                                  | 2.7.6.1                                |
| Ureidoglycolate hydrolase                                                                          | Cytosol               | 2 H + H2O + URDGLYC <-> CO2 + GLX + 2 NH4            | Histidine Metabolism       | SPAC19G12.04                                                               | 3.5.3.19                               |
| S-Formylglutathione hydrolase                                                                      | Cytosol               | SfGLUtH + H2O <-> FORM + GTHrd + H                   | Methane Metabolism         |                                                                            | 3.1.2.12                               |
| 5-methylthioadenosine phosphorylase                                                                | Nucleus               | 5mta + Pi -> 5mdr1p + ADE                            | Methionine Metabolism      | SPAC16C9.02c                                                               | 2.4.2.28                               |
| methionine synthase                                                                                | Nucleus               | 5mTHF + HCYS -> H + MET + THF                        | Methionine Metabolism      | SPAC9.09                                                                   | 2.1.1.14                               |
| O-acetylhomoserine (thiol)-lyase meth1                                                             | Nucleus               | ACHMS + CH4S -> AC + H + MET                         | Methionine Metabolism      | SPBC428.11                                                                 | 2.5.1.49                               |
| O-acetylhomoserine (thiol)-lyase meth1                                                             | Nucleus               | ACHMS + CYS -> AC + cyst-L + H                       | Methionine Metabolism      | SPBC15D4.09c                                                               | 2.5.1.48                               |
| O-acetylhomoserine (thiol)-lyase                                                                   | Nucleus               | ACHMS + H2S -> AC + H + HCYS                         | Methionine Metabolism      | SPBC428.11                                                                 | 2.5.1.49                               |
| diphthine synthase                                                                                 | Nucleus               | SAM + CAPHIS -> SAH + CMAPHIS + H                    | Methionine Metabolism      | SPCC576.14                                                                 | 2.1.1.98                               |
| adenosylmethionine decarboxylase                                                                   | Nucleus               | SAM + H -> ametam + CO2                              | Methionine Metabolism      | SPBP4H10.05c                                                               | 4.1.1.50                               |
| methionine adenosyltransferase                                                                     | Nucleus               | ATP + H2O + MET -> SAM + Pi + PPI                    | Methionine Metabolism      | SPBC14F5.05c                                                               | 2.5.1.6                                |
| 2,3-diketo-5-methylthio-1-phosphopentane degradation reaction                                      | Nucleus               | dkmmp + 3 H2O -> 2kmb + FORM + 6 H + Pi              | Methionine Metabolism      | SPAC644.08<br>SPBC887.01                                                   | 3.1.3.77,<br>1.13.11.53,<br>1.13.11.54 |
| O-succinylhomoserine lyase (elimination)                                                           | Nucleus               | H2O + SUCHMS <-> 2obut + H + NH4 + SUCC              | Methionine Metabolism      | SPBC15D4.09c                                                               | 2.5.1.48                               |
| 5-methyltetrahydropteroylglutamate-homocysteine S-methyltransferase                                | Nucleus               | HCYS + MHPGLU -> HpGLU + MET                         | Methionine Metabolism      | SPAC9.09                                                                   | 2.1.1.14                               |
| adenosylmethionine decarboxylase                                                                   | Cytosol               | SAM + H -> ametam + CO2                              | Methionine Metabolism      | SPBP4H10.05c                                                               | 4.1.1.50                               |
| adenosylhomocysteine                                                                               | Cytosol               | SAH + H2O -> ADN + HCYS                              | Methionine Metabolism      | SPBC8D2.18c                                                                | 3.3.1.1                                |
| O-acetylhomoserine (thiol)-lyase                                                                   | Cytosol               | ACHMS + CH4S -> AC + H + MET                         | Methionine Metabolism      | SPBC428.11                                                                 | 2.5.1.49                               |
| O-acetylhomoserine (thiol)-lyase                                                                   | Cytosol               | ACHMS + H2S -> AC + H + HCYS                         | Methionine Metabolism      | SPBC428.11                                                                 | 2.5.1.49                               |
| cystathionine b-lyase                                                                              | Cytosol               | cyst-L + H2O -> HCYS + NH4 + PYR                     | Methionine Metabolism      |                                                                            |                                        |
| cystathionine b-lyase                                                                              | Peroxisome            | cyst-L + H2O -> HCYS + NH4 + PYR                     | Methionine Metabolism      | SPCC11E10.01                                                               | 4.4.1.8                                |
| diphthine synthase                                                                                 | Cytosol               | SAM + CAPHIS -> SAH + CMAPHIS + H                    | Methionine Metabolism      | SPCC576.14                                                                 | 2.1.1.98                               |
| 2,3-diketo-5-methylthio-1-phosphopentane degradation reaction                                      | Cytosol               | dkmmp + 3 H2O -> 2kmb + FORM + 6 H + Pi              | Methionine Metabolism      | SPAC644.08<br>SPBC887.01                                                   | 3.1.3.77,<br>1.13.11.53,<br>1.13.11.54 |
| homoserine O-trans-acetylase                                                                       | Cytosol               | ACCoA + Hom-L <-> ACHMS + CoA                        | Methionine Metabolism      | SPBC56F2.11                                                                | 2.3.1.31                               |
| 5-Methylthio-5-deoxy-D-ribose 1-phosphate dehydratase                                              | Cytosol               | 5mdr1p -> dkmpp + H2O                                | Methionine Metabolism      |                                                                            |                                        |
| methionine adenosyltransferase                                                                     | Cytosol               | ATP + H2O + MET -> SAM + Pi + PPI                    | Methionine Metabolism      | SPBC14F5.05c                                                               | 2.5.1.6                                |
| meth1                                                                                              | Cytosol               | ACHMS + CYS -> AC + cyst-L + H                       | Methionine Metabolism      | SPBC15D4.09c                                                               | 2.5.1.48                               |
| methionine synthase                                                                                | Cytosol               | 5mTHF + HCYS -> H + MET + THF                        | Methionine Metabolism      | SPAC9.09                                                                   | 2.1.1.14                               |
| 5-methyltetrahydropteroylglutamate-homocysteine S-methyltransferase                                | Cytosol               | HCYS + MHPGLU -> HpGLU + MET                         | Methionine Metabolism      | SPAC9.09                                                                   | 2.1.1.14                               |
| 5-methylthioadenosine phosphorylase                                                                | Cytosol               | 5mta + Pi -> 5mdr1p + ADE                            | Methionine Metabolism      | SPAC16C9.02c                                                               | 2.4.2.28                               |
| 5-methylthioribose-1-phosphate isomerase                                                           | Cytosol               | 5mdr1p <-> 5mdr1p                                    | Methionine Metabolism      |                                                                            |                                        |

|                                                            |                       |                                         |                            |                            |          |
|------------------------------------------------------------|-----------------------|-----------------------------------------|----------------------------|----------------------------|----------|
| O-succinylhomoserine lyase (L-cysteine)                    | Cytosol               | CYS + SUCHMS -> cyst-L + H + SUCC       | Methionine Metabolism      |                            |          |
| O-succinylhomoserine lyase (elimination)                   | Cytosol               | H2O + SUCHMS <-> 2obut + H + NH4 + SUCC | Methionine Metabolism      | SPBC15D4.09c               | 2.5.1.48 |
| 2-keto-4-methylthiobutyrate transamination                 | Cytosol               | 2kmb + GLU -> AKG + MET                 | Methionine Metabolism      |                            |          |
| NAD diphosphatase                                          | Cytosol               | H2O + NAD -> AMP + 2 H + nmn            | NAD Biosynthesis           | SPBC1778.03c               | 3.6.1.22 |
| pURIne-nucleoside phosphorylase (Adenosine)                | Nucleus               | ADN + Pi <-> ADE + r1p                  | NAD Biosynthesis           | SPAC1805.16c               | 2.4.2.1  |
| nicotinate-nucleotide adenyltransferase                    | Nucleus               | ATP + H + nicrnt -> dNAD + PPI          | NAD Biosynthesis           | SPAC806.06c                | 2.7.7.1  |
| nicotinamide-nucleotide adenyltransferase                  | Nucleus               | ATP + H + nmn -> NAD + PPI              | NAD Biosynthesis           | SPAC806.06c                | 2.7.7.1  |
| ribosylnicotinamide kinase                                 | Nucleus               | ATP + mam -> ADP + H + nmn              | NAD Biosynthesis           | SPBP22H7.06                | 2.7.1.-  |
| pURIne-nucleoside phosphorylase (Guanosine)                | Nucleus               | GSN + Pi <-> GUA + r1p                  | NAD Biosynthesis           | SPAC1805.16c               | 2.4.2.1  |
| NAPRTase                                                   | Mitochondria          | H + nac + PRPP -> nicrnt + PPI          | NAD Biosynthesis           | SPAC1486.06                | 2.4.2.11 |
| NAPRTase                                                   | Nucleus               | H + nac + PRPP -> nicrnt + PPI          | NAD Biosynthesis           | SPAC1486.06                | 2.4.2.11 |
| NAD diphosphatase                                          | Nucleus               | H2O + NAD -> AMP + 2 H + nmn            | NAD Biosynthesis           | SPBC1778.03c               | 3.6.1.22 |
| NAD kinase                                                 | Cytosol               | ATP + NAD -> ADP + H + NADP             | NAD Biosynthesis           | SPCC24B10.02c              | 2.7.1.23 |
| NAD kinase                                                 | Mitochondria          | ATP + NAD -> ADP + H + NADP             | NAD Biosynthesis           | SPAC323.01c                | 2.7.1.86 |
| NADP phosphatase                                           | Cytosol               | H2O + NADP -> NAD + Pi                  | NAD Biosynthesis           |                            |          |
| NADP phosphatase                                           | Mitochondria          | H2O + NADP -> NAD + Pi                  | NAD Biosynthesis           |                            |          |
| NAD synthase (nh3)                                         | Cytosol               | ATP + dNAD + NH4 -> AMP + H + NAD + PPI | NAD Biosynthesis           | SPCC553.02                 | 6.3.5.1  |
| NAD synthase (nh3)                                         | Nucleus               | ATP + dNAD + NH4 -> AMP + H + NAD + PPI | NAD Biosynthesis           | SPCC553.02                 | 6.3.5.1  |
| nicotinamide-nucleotide adenyltransferase                  | Cytosol               | ATP + H + nmn -> NAD + PPI              | NAD Biosynthesis           | SPAC806.06c                | 2.7.7.1  |
| nicotinate-nucleotide adenyltransferase                    | Cytosol               | ATP + H + nicrnt -> dNAD + PPI          | NAD Biosynthesis           | SPAC806.06c                | 2.7.7.1  |
| Nicotinamide N-methyltransferase                           | Cytosol               | SAM + ncam -> 1mncam + SAH              | NAD Biosynthesis           | SPAC8F11.09c               | 2.1.1.1  |
| pURIne-nucleoside phosphorylase                            | Cytosol               | Pi + mam <-> H + ncam + r1p             | NAD Biosynthesis           |                            |          |
| ribosylnicotinamide kinase                                 | Cytosol               | ATP + mam -> ADP + H + nmn              | NAD Biosynthesis           | SPBP22H7.06                | 2.7.1.-  |
| carbonate dehydratase                                      | Cytosol               | CO2 + H2O -> H2CO3                      | Nitrogen Metabolism        | SPBP8B7.05c                | 4.2.1.1  |
| Urea amidohydrolase                                        | Cytosol               | urea + H2O -> CO2 + 2 NH4               | Nitrogen Metabolism        | SPAC1952.11c               | 3.5.1.5  |
| nitrilase                                                  | Nucleus               | 2 H2O + ind3acn1 -> ind3ac + NH4        | Nitrogen Metabolism        | SPBC651.02 SPCC965.09      | 3.5.-    |
| nitrilase                                                  | Cytosol               | 2 H2O + ind3acn1 -> ind3ac + NH4        | Nitrogen Metabolism        | SPBC651.02 SPCC965.09      | 3.5.-    |
| dinucleoside tetraphosphatase                              | Cytosol               | gp4g + H2O <-> GTP + GMP                | Nucleotide Salvage Pathway | SPCC4G3.02                 | 3.6.1.17 |
| P1,P4-Bis(5'-nucleosyl)-tetraphosphate nucleotidohydrolase | Cytosol               | xp4x + H2O <-> XTP + XMP                | Nucleotide Salvage Pathway | SPCC4G3.02                 | 3.6.1.17 |
| P1,P4-bis(5'-URIdyl)-tetraphosphate URIdylohydrolase       | Cytosol               | up4u + H2O -> UTP + UMP                 | Nucleotide Salvage Pathway | SPCC4G3.02                 | 3.6.1.17 |
| dinucleoside tetraphosphatase                              | Mitochondria          | gp4g + H2O <-> GTP + GMP                | Nucleotide Salvage Pathway | SPCC4G3.02                 | 3.6.1.17 |
| P1,P4-Bis(5'-nucleosyl)-tetraphosphate nucleotidohydrolase | Mitochondria          | xp4x + H2O <-> XTP + XMP                | Nucleotide Salvage Pathway | SPCC4G3.02                 | 3.6.1.17 |
| P1,P4-bis(5'-URIdyl)-tetraphosphate URIdylohydrolase       | Mitochondria          | up4u + H2O -> UTP + UMP                 | Nucleotide Salvage Pathway | SPCC4G3.02                 | 3.6.1.17 |
| dinucleoside tetraphosphatase                              | Nucleus               | gp4g + H2O <-> GTP + GMP                | Nucleotide Salvage Pathway | SPCC4G3.02                 | 3.6.1.17 |
| P1,P4-Bis(5'-nucleosyl)-tetraphosphate nucleotidohydrolase | Nucleus               | xp4x + H2O <-> XTP + XMP                | Nucleotide Salvage Pathway | SPCC4G3.02                 | 3.6.1.17 |
| P1,P4-bis(5'-URIdyl)-tetraphosphate URIdylohydrolase       | Nucleus               | up4u + H2O -> UTP + UMP                 | Nucleotide Salvage Pathway | SPCC4G3.02                 | 3.6.1.17 |
| Inosine ribohydrolase                                      | Cytosol               | INS + H2O -> HXAN + rib-D               | Nucleotide Salvage Pathway | SPBC1683.06c               | 3.2.2.1  |
| Xanthosine ribohydrolase                                   | Cytosol               | xtsn + H2O -> XAN + rib-D               | Nucleotide Salvage Pathway | SPBC1683.06c               | 3.2.2.1  |
| N-ribosylnicotinamide ribohydrolase                        | Cytosol               | rmam + H2O -> ncam + rib-D              | Nucleotide Salvage Pathway | SPBC1683.06c               | 3.2.2.1  |
| Inosine ribohydrolase                                      | Nucleus               | INS + H2O -> HXAN + rib-D               | Nucleotide Salvage Pathway | SPBC1683.06c               | 3.2.2.1  |
| Xanthosine ribohydrolase                                   | Nucleus               | xtsn + H2O -> XAN + rib-D               | Nucleotide Salvage Pathway | SPBC1683.06c               | 3.2.2.1  |
| N-ribosylnicotinamide ribohydrolase                        | Nucleus               | rmam + H2O -> ncam + rib-D              | Nucleotide Salvage Pathway | SPBC1683.06c               | 3.2.2.1  |
| nucleoside-diphosphatase (GDP)                             | Endoplasmic Reticulum | GDP + H2O -> GMP + H + Pi               | Nucleotide Salvage Pathway | SPAC824.08                 |          |
| guanine phosphoribosyltransferase                          | Endoplasmic Reticulum | GUA + PRPP -> GMP + PPI                 | Nucleotide Salvage Pathway | SPAC23C11.13c              |          |
| hypoxanthine phosphoribosyltransferase (Hypoxanthine)      | Endoplasmic Reticulum | HXAN + PRPP -> IMP + PPI                | Nucleotide Salvage Pathway | SPAC23C11.13c              |          |
| adenine deaminase                                          | Nucleus               | ADE + H + H2O -> HXAN + NH4             | Nucleotide Salvage Pathway | SPBC1198.02                | 3.5.4.4  |
| adenine phosphoribosyltransferase                          | Nucleus               | ADE + PRPP -> AMP + PPI                 | Nucleotide Salvage Pathway | SPAC23A1.03                | 2.4.2.7  |
| adenosine kinase                                           | Nucleus               | ADN + ATP -> ADP + AMP + H              | Nucleotide Salvage Pathway | SPCC338.14                 | 2.7.1.20 |
| Adenosine deaminase                                        | Nucleus               | ADN + H + H2O -> INS + NH4              | Nucleotide Salvage Pathway | SPBC1198.02                | 3.5.4.4  |
| adenosine hydrolase                                        | Nucleus               | ADN + H2O -> ADE + rib-D                | Nucleotide Salvage Pathway | SPAC17G8.02                |          |
| adenylate kinase                                           | Nucleus               | AMP + ATP <-> 2 ADP                     | Nucleotide Salvage Pathway | SPAC4G9.03                 | 2.7.4.3  |
| adentylate kinase (GTP), nucleus                           | Nucleus               | AMP + GTP <-> ADP + GDP                 | Nucleotide Salvage Pathway | SPAC4G9.03                 | 2.7.4.3  |
| adentylate kinase (ITP)                                    | Nucleus               | AMP + ITP <-> ADP + IDP                 | Nucleotide Salvage Pathway | SPAC4G9.03                 | 2.7.4.3  |
| dTMP kinase                                                | Nucleus               | ATP + dTMP <-> ADP + dTDP               | Nucleotide Salvage Pathway | SPCC70.07c                 | 2.7.4.9  |
| 5'-nucleotidase (CMP)                                      | Nucleus               | CMP + H2O -> cytd + Pi                  | Nucleotide Salvage Pathway | SPAC24B11.05               |          |
| cytidine kinase (GTP)                                      | Nucleus               | cytd + GTP -> CMP + GDP + H             | Nucleotide Salvage Pathway | SPCC162.11c                | 2.7.1.48 |
| Deoxyadenosine deaminase                                   | Nucleus               | dad-2 + H + H2O -> din + NH4            | Nucleotide Salvage Pathway | SPBC1683.02<br>SPBC1198.02 | 3.5.4.4  |
| pURIne-nucleoside phosphorylase (Deoxyadenosine)           | Nucleus               | dad-2 + Pi <-> 2dr1p + ADE              | Nucleotide Salvage Pathway | SPAC1805.16c               | 2.4.2.1  |
| dCTP deaminase                                             | Nucleus               | dCTP + H + H2O -> dUTP + NH4            | Nucleotide Salvage Pathway | SPBC2G2.13c                | 3.5.4.12 |
| deoxycytidine deaminase                                    | Nucleus               | dcyt + H + H2O -> dURI + NH4            | Nucleotide Salvage Pathway | SPAC1556.04c               | 3.5.4.5  |
| pURIne-nucleoside phosphorylase (Deoxyguanosine)           | Nucleus               | dGSN + Pi <-> 2dr1p + GUA               | Nucleotide Salvage Pathway | SPAC1805.16c               | 2.4.2.1  |
| pURIne-nucleoside phosphorylase (Deoxyinosine)             | Nucleus               | din + Pi <-> 2dr1p + HXAN               | Nucleotide Salvage Pathway | SPAC1805.16c               | 2.4.2.1  |
| gnnc                                                       | Nucleus               | GSN + H2O -> GUA + rib-D                | Nucleotide Salvage Pathway | SPAC17G8.02                |          |
| guanine phosphoribosyltransferase                          | Nucleus               | GUA + PRPP -> GMP + PPI                 | Nucleotide Salvage Pathway | SPAC23C11.13c              |          |
| 5'-nucleotidase (IMP)                                      | Nucleus               | H2O + IMP -> INS + Pi                   | Nucleotide Salvage Pathway | SPBC30D10.03c              | 3.1.3.-  |
| 5'-nucleotidase (UMP)                                      | Nucleus               | H2O + UMP -> Pi + URI                   | Nucleotide Salvage Pathway | SPAC24B11.05               |          |
| hypoxanthine phosphoribosyltransferase (Hypoxanthine)      | Nucleus               | HXAN + PRPP -> IMP + PPI                | Nucleotide Salvage Pathway | SPAC23C11.13c              |          |
| pURIne-nucleoside phosphorylase (Inosine)                  | Nucleus               | INS + Pi <-> HXAN + r1p                 | Nucleotide Salvage Pathway | SPAC1805.16c               | 2.4.2.1  |
| pURIne-nucleoside phosphorylase (Xanthosine)               | Nucleus               | Pi + xtsn <-> r1p + XAN                 | Nucleotide Salvage Pathway | SPAC1805.16c               | 2.4.2.1  |
| Adenosine deaminase                                        | Cytosol               | ADN + H + H2O -> INS + NH4              | Nucleotide Salvage Pathway | SPBC1198.02                | 3.5.4.4  |
| adenine deaminase                                          | Cytosol               | ADE + H + H2O -> HXAN + NH4             | Nucleotide Salvage Pathway | SPBC1198.02                | 3.5.4.4  |
| adenylate kinase                                           | Cytosol               | AMP + ATP <-> 2 ADP                     | Nucleotide Salvage Pathway | SPAC4G9.03                 | 2.7.4.3  |
| adenylate kinase                                           | Mitochondria          | AMP + ATP <-> 2 ADP                     | Nucleotide Salvage Pathway | SPAC4G9.03                 | 2.7.4.3  |
| adentylate kinase (GTP)                                    | Cytosol               | AMP + GTP <-> ADP + GDP                 | Nucleotide Salvage Pathway | SPAC4G9.03                 | 2.7.4.3  |
| adentylate kinase (GTP)                                    | Mitochondria          | AMP + GTP <-> ADP + GDP                 | Nucleotide Salvage Pathway | SPAC4G9.03                 | 2.7.4.3  |
| adentylate kinase (ITP)                                    | Cytosol               | AMP + ITP <-> ADP + IDP                 | Nucleotide Salvage Pathway | SPAC4G9.03                 | 2.7.4.3  |
| adentylate kinase (ITP)                                    | Mitochondria          | AMP + ITP <-> ADP + IDP                 | Nucleotide Salvage Pathway | SPAC4G9.03                 | 2.7.4.3  |
| adenosine kinase                                           | Cytosol               | ADN + ATP -> ADP + AMP + H              | Nucleotide Salvage Pathway | SPCC338.14                 | 2.7.1.20 |
| adenosine hydrolase                                        | Cytosol               | ADN + H2O -> ADE + rib-D                | Nucleotide Salvage Pathway | SPAC17G8.02                |          |
| adenine phosphoribosyltransferase                          | Cytosol               | ADE + PRPP -> AMP + PPI                 | Nucleotide Salvage Pathway | SPAC23A1.03                | 2.4.2.7  |
| AMP nucleosidase                                           | Cytosol               | AMP + H2O -> ADE + R5P                  | Nucleotide Salvage Pathway | SPBC106.04                 | 3.5.4.6  |



|                                                       |                 |                                   |                            |                                        |          |
|-------------------------------------------------------|-----------------|-----------------------------------|----------------------------|----------------------------------------|----------|
| ATP maintenance requirement                           | Cytosol         | ATP + H2O -> ADP + H + Pi         | Nucleotide Salvage Pathway |                                        |          |
| CMP nucleosidase                                      | Cytosol         | CMP + H2O -> csn + R5P            | Nucleotide Salvage Pathway |                                        |          |
| cytidine kinase (GTP)                                 | Cytosol         | cytd + GTP -> CMP + GDP + H       | Nucleotide Salvage Pathway | SPCC162.11c                            | 2.7.1.48 |
| cytidylate kinase (CMP)                               | Cytosol         | ATP + CMP -> ADP + CDP            | Nucleotide Salvage Pathway |                                        |          |
| cytidylate kinase (dCMP)                              | Cytosol         | ATP + dCMP -> ADP + dCDP          | Nucleotide Salvage Pathway |                                        |          |
| Deoxyadenosine deaminase                              | Cytosol         | dad-2 + H + H2O -> din + NH4      | Nucleotide Salvage Pathway | SPBC1683.02<br>SPBC1198.02             | 3.5.4.4  |
| deoxyadenylate kinase                                 | Cytosol         | ATP + dAMP -> ADP + dADP          | Nucleotide Salvage Pathway |                                        |          |
| dCTP deaminase                                        | Cytosol         | dCTP + H + H2O -> dUTP + NH4      | Nucleotide Salvage Pathway | SPBC2G2.13c                            | 3.5.4.12 |
| deoxycytidine deaminase                               | Cytosol         | dcyt + H + H2O -> dURI + NH4      | Nucleotide Salvage Pathway | SPAC1556.04c                           | 3.5.4.5  |
| dTMP kinase                                           | Cytosol         | ATP + dTMP -> ADP + dTDP          | Nucleotide Salvage Pathway | SPCC70.07c                             | 2.7.4.9  |
| gnnuc                                                 | Cytosol         | GSN + H2O -> GUA + rib-D          | Nucleotide Salvage Pathway | SPAC17G8.02                            |          |
| guanosine kinase                                      | Cytosol         | ATP + GSN -> ADP + GMP + H        | Nucleotide Salvage Pathway |                                        |          |
| guanine deaminase                                     | Cytosol         | GUA + H + H2O -> NH4 + XAN        | Nucleotide Salvage Pathway | SPCC1672.03c                           | 3.5.4.3  |
| guanine phosphoribosyltransferase                     | Cytosol         | GUA + PRPP -> GMP + PPI           | Nucleotide Salvage Pathway | SPAC23C11.13c                          |          |
| hypoxanthine phosphoribosyltransferase (Hypoxanthine) | Cytosol         | HXAN + PRPP -> IMP + PPI          | Nucleotide Salvage Pathway | SPAC23C11.13c                          |          |
| inosine kinase                                        | Cytosol         | ATP + INS -> ADP + H + IMP        | Nucleotide Salvage Pathway |                                        |          |
| nucleoside-diphosphatase (GDP)                        | Golgi apparatus | GDP + H2O -> GMP + H + Pi         | Nucleotide Salvage Pathway | SPAC824.08                             |          |
| nucleoside-diphosphatase (dGDP)                       | Cytosol         | dGDP + H2O -> dGMP + H + Pi       | Nucleotide Salvage Pathway |                                        |          |
| nucleoside-diphosphate kinase (ATP:GDP)               | Cytosol         | ATP + GDP -> ADP + GTP            | Nucleotide Salvage Pathway | SPAC806.07                             | 2.7.4.6  |
| nucleoside-diphosphate kinase (ATP:UDP)               | Cytosol         | ATP + UDP -> ADP + UTP            | Nucleotide Salvage Pathway | SPAC806.07                             | 2.7.4.6  |
| nucleoside-diphosphate kinase (ATP:CDP)               | Cytosol         | ATP + CDP -> ADP + CTP            | Nucleotide Salvage Pathway | SPAC806.07                             | 2.7.4.6  |
| nucleoside-diphosphate kinase (ATP:dTDP)              | Cytosol         | ATP + dTDP -> ADP + dITP          | Nucleotide Salvage Pathway | SPAC806.07                             | 2.7.4.6  |
| nucleoside-diphosphate kinase (ATP:dGDP)              | Cytosol         | ATP + dGDP -> ADP + dGTP          | Nucleotide Salvage Pathway | SPAC806.07                             | 2.7.4.6  |
| nucleoside-diphosphate kinase (ATP:dUDP)              | Cytosol         | ATP + dUDP -> ADP + dUTP          | Nucleotide Salvage Pathway | SPAC806.07                             | 2.7.4.6  |
| nucleoside-diphosphate kinase (ATP:dCDP)              | Cytosol         | ATP + dCDP -> ADP + dCTP          | Nucleotide Salvage Pathway | SPAC806.07                             | 2.7.4.6  |
| nucleoside-diphosphate kinase (ATP:dADP)              | Cytosol         | ATP + dADP -> ADP + dATP          | Nucleotide Salvage Pathway | SPAC806.07                             | 2.7.4.6  |
| nucleoside-diphosphate kinase (ATP:IDP)               | Cytosol         | ATP + IDP -> ADP + ITP            | Nucleotide Salvage Pathway | SPAC806.07                             | 2.7.4.6  |
| 5'-nucleotidase (dUMP)                                | Cytosol         | dUMP + H2O -> dURI + Pi           | Nucleotide Salvage Pathway |                                        |          |
| 5'-nucleotidase (XMP)                                 | Cytosol         | XMP + H2O -> xtsn + Pi            | Nucleotide Salvage Pathway |                                        |          |
| 5'-nucleotidase (IMP)                                 | Cytosol         | H2O + IMP -> INS + Pi             | Nucleotide Salvage Pathway | SPBC30D10.03c                          | 3.1.3.-  |
| 5'-nucleotidase (UMP)                                 | Cytosol         | H2O + UMP -> Pi + URI             | Nucleotide Salvage Pathway | SPAC24B11.05                           |          |
| 5'-nucleotidase (dCMP)                                | Cytosol         | dCMP + H2O -> dcyt + Pi           | Nucleotide Salvage Pathway |                                        |          |
| 5'-nucleotidase (CMP)                                 | Cytosol         | CMP + H2O -> cytd + Pi            | Nucleotide Salvage Pathway | SPAC24B11.05                           |          |
| 5'-nucleotidase (dTMP)                                | Cytosol         | dTMP + H2O -> Pi + THYMD          | Nucleotide Salvage Pathway |                                        |          |
| 5'-nucleotidase (dAMP)                                | Cytosol         | dAMP + H2O -> dad-2 + Pi          | Nucleotide Salvage Pathway |                                        |          |
| 5'-nucleotidase (AMP)                                 | Cytosol         | AMP + H2O -> ADN + Pi             | Nucleotide Salvage Pathway |                                        |          |
| 5'-nucleotidase (dGMP)                                | Cytosol         | dGMP + H2O -> dGSN + Pi           | Nucleotide Salvage Pathway |                                        |          |
| 5'-nucleotidase (GMP)                                 | Cytosol         | GMP + H2O -> GSN + Pi             | Nucleotide Salvage Pathway |                                        |          |
| nucleoside-triphosphatase (GTP)                       | Cytosol         | GTP + H2O -> GDP + H + Pi         | Nucleotide Salvage Pathway |                                        |          |
| nucleoside-triphosphatase (dGTP)                      | Cytosol         | dGTP + H2O -> dGDP + H + Pi       | Nucleotide Salvage Pathway |                                        |          |
| pURIne-nucleoside phosphorylase (Adenosine)           | Cytosol         | ADN + Pi -> ADE + r1p             | Nucleotide Salvage Pathway | SPAC1805.16c                           | 2.4.2.1  |
| pURIne-nucleoside phosphorylase (Deoxyadenosine)      | Cytosol         | dad-2 + Pi -> 2dr1p + ADE         | Nucleotide Salvage Pathway | SPAC1805.16c                           | 2.4.2.1  |
| pURIne-nucleoside phosphorylase (Guanosine)           | Cytosol         | GSN + Pi -> GUA + r1p             | Nucleotide Salvage Pathway | SPAC1805.16c                           | 2.4.2.1  |
| pURIne-nucleoside phosphorylase (Deoxyguanosine)      | Cytosol         | dGSN + Pi -> 2dr1p + GUA          | Nucleotide Salvage Pathway | SPAC1805.16c                           | 2.4.2.1  |
| pURIne-nucleoside phosphorylase (Inosine)             | Cytosol         | INS + Pi -> HXAN + r1p            | Nucleotide Salvage Pathway | SPAC1805.16c                           | 2.4.2.1  |
| pURIne-nucleoside phosphorylase (Deoxyinosine)        | Cytosol         | din + Pi -> 2dr1p + HXAN          | Nucleotide Salvage Pathway | SPAC1805.16c                           | 2.4.2.1  |
| pURIne-nucleoside phosphorylase (Xanthosine)          | Cytosol         | Pi + xtsn -> r1p + XAN            | Nucleotide Salvage Pathway | SPAC1805.16c                           | 2.4.2.1  |
| pyrimidine-nucleoside phosphorylase (uracil)          | Cytosol         | Pi + URI -> r1p + ura             | Nucleotide Salvage Pathway |                                        |          |
| ribonucleoside-diphosphate reductase (ADP)            | Cytosol         | ADP + TRDrd -> dADP + H2O + TRDox | Nucleotide Salvage Pathway | SPAC7D4.07c<br>SPBC25D12.04+SPAC1F7.05 |          |
| ribonucleoside-diphosphate reductase                  | Nucleus         | ADP + TRDrd -> dADP + H2O + TRDox | Nucleotide Salvage Pathway | SPAC7D4.07c<br>SPBC25D12.04+SPAC1F7.05 |          |
| ribonucleoside-diphosphate reductase (GDP)            | Cytosol         | GDP + TRDrd -> dGDP + H2O + TRDox | Nucleotide Salvage Pathway | SPAC7D4.07c<br>SPBC25D12.04+SPAC1F7.05 |          |
| ribonucleoside-diphosphate reductase (GDP)            | Nucleus         | GDP + TRDrd -> dGDP + H2O + TRDox | Nucleotide Salvage Pathway | SPAC7D4.07c<br>SPBC25D12.04+SPAC1F7.05 |          |
| ribonucleoside-diphosphate reductase (CDP)            | Cytosol         | CDP + TRDrd -> dCDP + H2O + TRDox | Nucleotide Salvage Pathway | SPAC7D4.07c<br>SPBC25D12.04+SPAC1F7.05 |          |
| ribonucleoside-diphosphate reductase (CDP)            | Nucleus         | CDP + TRDrd -> dCDP + H2O + TRDox | Nucleotide Salvage Pathway | SPAC7D4.07c<br>SPBC25D12.04+SPAC1F7.05 |          |
| ribonucleoside-diphosphate reductase (UDP)            | Cytosol         | UDP + TRDrd -> dUDP + H2O + TRDox | Nucleotide Salvage Pathway | SPAC7D4.07c<br>SPBC25D12.04+SPAC1F7.05 |          |
| ribonucleoside-diphosphate reductase (UDP)            | Nucleus         | UDP + TRDrd -> dUDP + H2O + TRDox | Nucleotide Salvage Pathway | SPAC7D4.07c<br>SPBC25D12.04+SPAC1F7.05 |          |
| ribonucleoside-triphosphate reductase (ATP)           | Cytosol         | ATP + TRDrd -> dATP + H2O + TRDox | Nucleotide Salvage Pathway | SPAC7D4.07c                            |          |
| ribonucleoside-triphosphate reductase (GTP)           | Cytosol         | GTP + TRDrd -> dGTP + H2O + TRDox | Nucleotide Salvage Pathway | SPAC7D4.07c                            |          |
| ribonucleoside-triphosphate reductase (CTP)           | Cytosol         | CTP + TRDrd -> dCTP + H2O + TRDox | Nucleotide Salvage Pathway | SPAC7D4.07c                            |          |
| ribonucleoside-triphosphate reductase (UTP)           | Cytosol         | UTP + TRDrd -> dUTP + H2O + TRDox | Nucleotide Salvage Pathway | SPAC7D4.07c                            |          |
| UMP kinase                                            | Cytosol         | ATP + UMP -> ADP + UDP            | Nucleotide Salvage Pathway | SPCC1795.05c                           |          |
| UMP kinase                                            | Nucleus         | ATP + UMP -> ADP + UDP            | Nucleotide Salvage Pathway | SPCC1795.05c                           |          |
| URIdylate kinase (dUMP)                               | Cytosol         | ATP + dUMP -> ADP + dUDP          | Nucleotide Salvage Pathway | SPCC1795.05c                           |          |
| URIdylate kinase (dUMP)                               | Nucleus         | ATP + dUMP -> ADP + dUDP          | Nucleotide Salvage Pathway | SPCC1795.05c                           |          |
| UTP diphosphohydrolase                                | Cytosol         | 2 H2O + UTP -> 2 H + 2 Pi + UMP   | Nucleotide Salvage Pathway | SPCC11E10.05c                          |          |
| xanthine phosphoribosyltransferase                    | Cytosol         | PRPP + XAN -> PPI + XMP           | Nucleotide Salvage Pathway | SPAC23C11.13c                          |          |
| ADP-ribose 2,3-cyclic phosphodiesterase               | Cytosol         | 23cAMP + H + H2O -> AMP2P         | Other                      | SPACUNK4.15                            |          |
| 2-deoxyglucose-6-phosphatase                          | Cytosol         | 2doxG6P + H2O -> 2dGLC + Pi       | Other                      |                                        |          |
| trans-aconitate 3-methyltransferase                   | Cytosol         | acon-T + SAM -> acon5m + SAH      | Other                      | SPAC25B8.09<br>SPAC25B8.10             |          |
| HCO3 equilibration reaction                           | Cytosol         | CO2 + H2O -> H + HCO3             | Other                      |                                        |          |
| HCO3 equilibration reaction                           | Mitochondria    | CO2 + H2O -> H + HCO3             | Other                      |                                        |          |
| HCO3 equilibrium reaction                             | Nucleus         | CO2 + H2O -> H + HCO3             | Other                      |                                        |          |
| hydrogen peroxide reductase (thioredoxin)             | Cytosol         | H2O2 + TRDrd -> 2 H2O + TRDox     | Other                      | SPCC576.03c<br>SPAC7D4.07c             |          |
| hydrogen peroxide reductase (thioredoxin)             | Mitochondria    | H2O2 + TRDrd -> 2 H2O + TRDox     | Other                      | SPBC12D12.07c                          |          |

|                                                                |                 |                                                                               |                                   |                                                                                                                                                                                                                                                                                                |                                                           |
|----------------------------------------------------------------|-----------------|-------------------------------------------------------------------------------|-----------------------------------|------------------------------------------------------------------------------------------------------------------------------------------------------------------------------------------------------------------------------------------------------------------------------------------------|-----------------------------------------------------------|
| Thioredoxin                                                    | Nucleus         | $H_2O_2 + TRDr \rightarrow 2 H_2O + TRDox$                                    | Other                             | SPAC7D4.07c<br>SPBC1773.02c<br>SPAC7D4.07c<br>SPCC330.06c                                                                                                                                                                                                                                      |                                                           |
| hydrogen peroxide reductase (thioredoxin)                      | Peroxisome      | $H_2O_2 + TRDr \leftrightarrow 2 H_2O + TRDox$                                | Other                             |                                                                                                                                                                                                                                                                                                |                                                           |
| Aminobutyraldehyde dehydrogenase, cytoplasm                    | Cytosol         | $4abutn + H_2O + NAD \rightarrow 4abut + 2 H + NADH$                          | Other Amino Acid Metabolism       | SPAC9E9.09c                                                                                                                                                                                                                                                                                    | 1.2.1.3                                                   |
| Aminobutyraldehyde dehydrogenase                               | Golgi apparatus | $4abutn + H_2O + NAD \rightarrow 4abut + 2 H + NADH$                          | Other Amino Acid Metabolism       | SPAC9E9.09c                                                                                                                                                                                                                                                                                    | 1.2.1.3                                                   |
| Peptide alpha-N-acetyltransferase                              | Mitochondria    | $ACCoA + PEPD \rightarrow APEP + CoA + H$                                     | Other Amino Acid Metabolism       | SPBC106.07c                                                                                                                                                                                                                                                                                    |                                                           |
| nitrilase                                                      | Mitochondria    | $acybut + 2 H_2O \rightarrow GLU + NH_4$                                      | Other Amino Acid Metabolism       | SPAC26A3.11                                                                                                                                                                                                                                                                                    |                                                           |
| nitrilase                                                      | Mitochondria    | $aprop + 2 H_2O \rightarrow ALA + NH_4$                                       | Other Amino Acid Metabolism       | SPAC26A3.11<br>SPAC4F10.20<br>SPBC32F12.03c                                                                                                                                                                                                                                                    | 1.11.1.9                                                  |
| glutathione peroxidase                                         | Nucleus         | $2 GTHrd + H_2O_2 \leftrightarrow GTHox + 2 H_2O$                             | Other Amino Acid Metabolism       | SPAC9E9.09c                                                                                                                                                                                                                                                                                    | 1.2.1.3                                                   |
| Aminobutyraldehyde dehydrogenase                               | Nucleus         | $4abutn + H_2O + NAD \rightarrow 4abut + 2 H + NADH$                          | Other Amino Acid Metabolism       | SPAC9E9.09c                                                                                                                                                                                                                                                                                    | 1.2.1.3                                                   |
| nitrilase                                                      | Nucleus         | $acybut + 2 H_2O \rightarrow GLU + NH_4$                                      | Other Amino Acid Metabolism       | SPBC651.02 SPCC965.09                                                                                                                                                                                                                                                                          |                                                           |
| nitrilase                                                      | Nucleus         | $aprop + 2 H_2O \rightarrow ALA + NH_4$                                       | Other Amino Acid Metabolism       | SPBC651.02 SPCC965.09                                                                                                                                                                                                                                                                          |                                                           |
| gamma-glutamylcysteine synthetase                              | Nucleus         | $ATP + CYS + GLU \rightarrow ADP + GLUcys + H + Pi$                           | Other Amino Acid Metabolism       | SPAC22F3.10c                                                                                                                                                                                                                                                                                   | 6.3.2.2                                                   |
| 4-acetamidobutyrate deacetylase                                | Cytosol         | $4aabutn + H_2O \rightarrow 4abut + ac$                                       | Other Amino Acid Metabolism       |                                                                                                                                                                                                                                                                                                |                                                           |
| Aminobutyraldehyde dehydrogenase                               | Mitochondria    | $4abutn + H_2O + NAD \rightarrow 4abut + 2 H + NADH$                          | Other Amino Acid Metabolism       | SPAC9E9.09c                                                                                                                                                                                                                                                                                    | 1.2.1.3                                                   |
| N-acetylputrescine: oxygen oxidoreductase (deaminating)        | Cytosol         | $aprut + H_2O + O_2 \rightarrow H_2O_2 + n4abutn + NH_4$                      | Other Amino Acid Metabolism       |                                                                                                                                                                                                                                                                                                |                                                           |
| glycylpeptide N-tetradecanoyltransferase                       | Cytosol         | $glp + C14CoA \rightarrow CoA + tglp$                                         | Other Amino Acid Metabolism       | SPBC2G2.11                                                                                                                                                                                                                                                                                     | 2.3.1.9                                                   |
| gamma-glutamylcysteine synthetase                              | Cytosol         | $ATP + CYS + GLU \rightarrow ADP + GLUcys + H + Pi$                           | Other Amino Acid Metabolism       | SPAC22F3.10c<br>SPBC17A3.07                                                                                                                                                                                                                                                                    | 6.3.2.2                                                   |
| glutathione oxidoreductase                                     | Cytosol         | $GTHox + H + NADPH \rightarrow 2 GTHrd + NADP$                                | Other Amino Acid Metabolism       | SPAC4F10.20<br>SPAC26H8.06<br>SPBC32F12.03c                                                                                                                                                                                                                                                    | 1.8.1.7                                                   |
| glutathione peroxidase                                         | Cytosol         | $2 GTHrd + H_2O_2 \leftrightarrow GTHox + 2 H_2O$                             | Other Amino Acid Metabolism       | SPAC3F10.04                                                                                                                                                                                                                                                                                    | 1.11.1.9                                                  |
| glutathione synthetase                                         | Cytosol         | $ATP + GLUcys + GLY \rightarrow ADP + GTHrd + H + Pi$                         | Other Amino Acid Metabolism       |                                                                                                                                                                                                                                                                                                |                                                           |
| N4-Acetylaminobutanal:NAD+ oxidoreductase                      | Cytosol         | $H_2O + n4abutn + NAD \rightarrow 4aabutn + 2 H + NADH$                       | Other Amino Acid Metabolism       |                                                                                                                                                                                                                                                                                                | 1.2.1.3                                                   |
| nitrilase                                                      | Cytosol         | $aprop + 2 H_2O \rightarrow ALA + NH_4$                                       | Other Amino Acid Metabolism       | SPBC651.02 SPCC965.09<br>SPAC26A3.11<br>SPBC651.02 SPCC965.09                                                                                                                                                                                                                                  |                                                           |
| nitrilase                                                      | Cytosol         | $acybut + 2 H_2O \rightarrow GLU + NH_4$                                      | Other Amino Acid Metabolism       | SPAC26A3.11<br>SPAC22.12c<br>SPAC14C4.14<br>SPBC1734.13<br>SPCC1840.06<br>SPBC13E7.04<br>SPBC31F10.15c<br>ScpofMp09 ScpofMp06<br>SPBC1604.07 ScpofMp08<br>SPBC29A10.13                                                                                                                         | 3.6.3.14<br>3.6.3.6<br>3.6.1.1                            |
| ATP synthase                                                   | Mitochondria    | $ADP[m] + 3 H[c] + Pi[m] \rightarrow ATP[m] + 2 H[m] + H_2O[m]$               | Oxidative Phosphorylation         | SPBC1604.11<br>SPAC23C4.11<br>SPAC343.05<br>SPAC637.05c<br>SPAPB2B4.05<br>SPCC965.03<br>SPAC11E3.07<br>SPBC3B9.18c<br>SPBC1289.05c<br>SPAC16E8.07c<br>SPAC17A2.03c<br>SPAC77B4.10<br>SPCC191.07<br>SPBC365.02c ScpofMp01<br>ScpofMp10 SPCC338.10c<br>SPAC1B2.04<br>SPAC1296.02<br>SPCC1739.09c |                                                           |
| Cytochrome c peroxidase                                        | Mitochondria    | $2 fcytc + H_2O_2 \rightarrow 2 fcytc + 2 H_2O$                               | Oxidative Phosphorylation         | SPCC1442.08c<br>SPCC1259.05c<br>SPAC24C9.16c<br>SPAC1420.04c<br>SPAC22E12.10c<br>SPBC26H8.14c<br>SPBC10B3.00<br>ScpofMp04<br>SPBC29A3.18                                                                                                                                                       | 1.9.3.1                                                   |
| cytochrome c oxidase                                           | Mitochondria    | $4 fcytc[m] + 6 H[m] + O_2[m] \rightarrow 4 fcytc[m] + 6 H_2O[m]$             | Oxidative Phosphorylation         | SPCC613.10<br>SPBC16C6.08c<br>SPCC37.02c<br>SPAC1782.07<br>SPCC1682.01<br>SPBC10B3.00                                                                                                                                                                                                          |                                                           |
| ubiquinol-6 cytochrome c reductase                             | Mitochondria    | $2 fcytc[m] + 1.5 H[m] + Q6H2[m] \rightarrow 2 fcytc[m] + 1.5 H_2[c] + Q6[m]$ | Oxidative Phosphorylation         | SPAC3A11.07<br>SPBC947.15c<br>SPAC3A11.07<br>SPBC947.15c<br>SPAC23C11.05<br>SPAC3A12.02<br>SPCC330.12c                                                                                                                                                                                         | 1.10.2.2                                                  |
| formate dehydrogenase/mitochondrial                            | Mitochondria    | $for[c] + H[c] + Q6[m] \rightarrow CO_2[c] + Q6H2[m]$                         | Oxidative Phosphorylation         |                                                                                                                                                                                                                                                                                                | 1.2.1.2                                                   |
| fumarate reductase                                             | Mitochondria    | $FADH_2 + FUM \rightarrow fad + SUCC$                                         | Oxidative Phosphorylation         | SPAC17A2.05                                                                                                                                                                                                                                                                                    |                                                           |
| fumarase                                                       | Cytosol         | $FUM + H_2O \leftrightarrow MAL$                                              | Oxidative Phosphorylation         | SPCC18.18c                                                                                                                                                                                                                                                                                     | 4.2.1.2                                                   |
| fumarase                                                       | Mitochondria    | $FUM + H_2O \leftrightarrow MAL$                                              | Oxidative Phosphorylation         | SPCC18.18c                                                                                                                                                                                                                                                                                     | 4.2.1.2                                                   |
| malate dehydrogenase                                           | Cytosol         | $MAL + NAD \leftrightarrow H + NADH + OAA$                                    | Oxidative Phosphorylation         |                                                                                                                                                                                                                                                                                                |                                                           |
| malate dehydrogenase                                           | Mitochondria    | $MAL + NAD \leftrightarrow H + NADH + OAA$                                    | Oxidative Phosphorylation         | SPCC306.08c                                                                                                                                                                                                                                                                                    |                                                           |
| malate dehydrogenase                                           | Peroxisome      | $MAL + NAD \leftrightarrow H + NADH + OAA$                                    | Oxidative Phosphorylation         |                                                                                                                                                                                                                                                                                                |                                                           |
| NADH dehydrogenase/mitochondrial                               | Mitochondria    | $H[c] + NADH[c] + Q6[m] \rightarrow NAD[c] + Q6H2[m]$                         | Oxidative Phosphorylation         | SPAC3A11.07<br>SPBC947.15c                                                                                                                                                                                                                                                                     |                                                           |
| NADH dehydrogenase                                             | Mitochondria    | $H + NADH + Q6 \rightarrow NAD + Q6H_2$                                       | Oxidative Phosphorylation         | SPAC3A11.07<br>SPBC947.15c                                                                                                                                                                                                                                                                     |                                                           |
| inorganic diphosphatase                                        | Cytosol         | $H_2O + PPi \rightarrow H + 2 Pi$                                             | Oxidative Phosphorylation         | SPAC23C11.05<br>SPAC3A12.02<br>SPCC330.12c                                                                                                                                                                                                                                                     |                                                           |
| succinate dehydrogenase                                        | Mitochondria    | $fad + SUCC \leftrightarrow FADH_2 + FUM$                                     | Oxidative Phosphorylation         | SPBP23A10.16<br>SPAC1556.02c<br>SPAC140.01                                                                                                                                                                                                                                                     | 1.3.5.1                                                   |
| succinate dehydrogenase (ubiquinone-6)                         | Mitochondria    | $FADH_2 + Q6 \leftrightarrow fad + Q6H_2$                                     | Oxidative Phosphorylation         |                                                                                                                                                                                                                                                                                                |                                                           |
| 3-methyl-2-oxobutanoate hydroxymethyltransferase, mitochondria | Mitochondria    | $3MOB + H_2O + MLTHF \rightarrow 2DHP + THF$                                  | Pantothenate and CoA Biosynthesis | SPAC5H10.09c                                                                                                                                                                                                                                                                                   | 2.1.2.11                                                  |
| CoA hydrolase                                                  | Mitochondria    | $CoA + H_2O \rightarrow 2 H + pan4p + PAP$                                    | Pantothenate and CoA Biosynthesis | SPAC6G9.05                                                                                                                                                                                                                                                                                     |                                                           |
| biotin synthase                                                | Mitochondria    | $dbt + s \leftrightarrow btn + 2 H$                                           | Pantothenate and CoA Biosynthesis | SPCC1235.02                                                                                                                                                                                                                                                                                    | 2.8.1.6                                                   |
| 2-dehydropantoate 2-reductase                                  | Nucleus         | $2DHP + H + NADPH \rightarrow NADP + pant-R$                                  | Pantothenate and CoA Biosynthesis | SPBPB2B2.09c                                                                                                                                                                                                                                                                                   | 1.1.1.169                                                 |
| pantothenate synthase                                          | Nucleus         | $ala-B + ATP + pant-R \rightarrow AMP + H + pnto-R + PPi$                     | Pantothenate and CoA Biosynthesis | SPAC5H10.08c                                                                                                                                                                                                                                                                                   | 6.3.2.1                                                   |
| aldehyde dehydrogenase (3-aminopropanal, NAD)                  | Nucleus         | $aproa + H_2O + NAD \rightarrow ala-B + 2 H + NADH$                           | Pantothenate and CoA Biosynthesis | SPAC922.07c                                                                                                                                                                                                                                                                                    | 1.2.1.5                                                   |
| aldehyde dehydrogenase (3-aminopropanal, NAD)                  | Cytosol         | $aproa + H_2O + NAD \rightarrow ala-B + 2 H + NADH$                           | Pantothenate and CoA Biosynthesis | SPAC922.07c                                                                                                                                                                                                                                                                                    | 1.2.1.5<br>6.3.4.9,<br>6.3.4.10,<br>6.3.4.11,<br>6.3.4.15 |
| biotin-[acetyl-CoA-carboxylase] ligase                         | Cytosol         | $ATP + btn + H \rightarrow btAMP + PPi$                                       | Pantothenate and CoA Biosynthesis | SPBC30D10.07c                                                                                                                                                                                                                                                                                  |                                                           |
| CoA hydrolase                                                  | Peroxisome      | $CoA + H_2O \rightarrow 2 H + pan4p + PAP$                                    | Pantothenate and CoA Biosynthesis | SPAC6G9.05                                                                                                                                                                                                                                                                                     |                                                           |
| dephospho-CoA kinase                                           | Cytosol         | $ATP + dpCoA \rightarrow ADP + CoA + H$                                       | Pantothenate and CoA Biosynthesis |                                                                                                                                                                                                                                                                                                |                                                           |

|                                                             |                 |                                                                                                                                                    |                                   |                                                                                        |           |
|-------------------------------------------------------------|-----------------|----------------------------------------------------------------------------------------------------------------------------------------------------|-----------------------------------|----------------------------------------------------------------------------------------|-----------|
| dephospho-CoA kinase                                        | Mitochondria    | ATP + dpCoA -> ADP + CoA + H                                                                                                                       | Pantothenate and CoA Biosynthesis |                                                                                        |           |
| 2-dehydropanoate 2-reductase                                | Cytosol         | 2DHP + H + NADPH -> NADP + pant-R                                                                                                                  | Pantothenate and CoA Biosynthesis | SPBPB2B2.09c                                                                           | 1.1.1.69  |
| pantothenate synthase                                       | Cytosol         | ala-B + ATP + pant-R -> AMP + H + pnto-R + PPi                                                                                                     | Pantothenate and CoA Biosynthesis | SPAC5H10.08c                                                                           | 6.3.2.1   |
| polyamine oxidase                                           | Cytosol         | N1aspm + H2O + O2 -> aproa + aprut + H2O2                                                                                                          | Pantothenate and CoA Biosynthesis |                                                                                        |           |
| polyamine oxidase                                           | Cytosol         | N1sprm + H2O + O2 -> N1aspm + aproa + H2O2                                                                                                         | Pantothenate and CoA Biosynthesis |                                                                                        |           |
| polyamine oxidase                                           | Cytosol         | H2O + O2 + sprm -> aproa + H2O2 + spmd                                                                                                             | Pantothenate and CoA Biosynthesis |                                                                                        |           |
| phosphopantothenoylcysteine decarboxylase                   | Cytosol         | 4ppcys + H -> CO2 + pan4p                                                                                                                          | Pantothenate and CoA Biosynthesis |                                                                                        |           |
| phosphopantothenate-cysteine ligase                         | Cytosol         | 4ppan + CTP + CYS -> 4ppcys + CMP + H + PPi                                                                                                        | Pantothenate and CoA Biosynthesis |                                                                                        |           |
| panthetheine-phosphate adenyllyltransferase                 | Cytosol         | ATP + H + pan4p -> dpCoA + PPi                                                                                                                     | Pantothenate and CoA Biosynthesis |                                                                                        |           |
| panthetheine-phosphate adenyllyltransferase                 | Mitochondria    | ATP + H + pan4p -> dpCoA + PPi                                                                                                                     | Pantothenate and CoA Biosynthesis |                                                                                        |           |
| phosphogluconate dehydrogenase                              | Mitochondria    | 6pgc + NADP -> CO2 + NADPH + ru5p-D                                                                                                                | Pentose Phosphate Pathway         | SPBC660.16                                                                             | 1.1.1.44  |
| 6-phosphogluconolactonase                                   | Nucleus         | 6pgl + H2O -> 6pgc + H                                                                                                                             | Pentose Phosphate Pathway         | SPCC16C4.10                                                                            | 3.1.1.31  |
| Deoxyribokinase                                             | Nucleus         | ATP + drib -> 2dR5P + ADP + H                                                                                                                      | Pentose Phosphate Pathway         | SPBC16G5.02c                                                                           |           |
| ribokinase                                                  | Nucleus         | ATP + rib-D -> ADP + H + R5P                                                                                                                       | Pentose Phosphate Pathway         | SPBC16G5.02c                                                                           | 2.7.1.15  |
| transketolase                                               | Nucleus         | E4P + xu5p-D <> F6P + G3P                                                                                                                          | Pentose Phosphate Pathway         | SPBC2G5.05                                                                             | 2.2.1.1   |
| phosphoglucomutase                                          | Nucleus         | g1p <> G6P                                                                                                                                         | Pentose Phosphate Pathway         | SPBC32F12.10<br>SPCC1840.05c                                                           | 5.4.2.2   |
| phosphopentomutase                                          | Nucleus         | r1p <> R5P                                                                                                                                         | Pentose Phosphate Pathway         | SPBC32F12.10<br>SPCC1840.05c                                                           | 5.4.2.2   |
| transketolase                                               | Nucleus         | R5P + xu5p-D <> G3P + s7p                                                                                                                          | Pentose Phosphate Pathway         | SPBC2G5.05                                                                             | 2.2.1.1   |
| ribulose 5-phosphate 3-ePimerase                            | Nucleus         | ru5p-D <> xu5p-D                                                                                                                                   | Pentose Phosphate Pathway         | SPAC31G5.05c                                                                           | 5.1.3.1   |
| Deoxyribokinase                                             | Cytosol         | ATP + drib -> 2dR5P + ADP + H                                                                                                                      | Pentose Phosphate Pathway         | SPBC16G5.02c<br>SPCC794.01c<br>SPAC3C7.13c<br>SPAC3A12.18                              | 1.1.1.49  |
| glucose 6-phosphate dehydrogenase                           | Cytosol         | G6P + NADP -> 6pgl + H + NADPH                                                                                                                     | Pentose Phosphate Pathway         | SPBC660.16                                                                             | 1.1.1.44  |
| phosphogluconate dehydrogenase                              | Cytosol         | 6pgc + NADP -> CO2 + NADPH + ru5p-D                                                                                                                | Pentose Phosphate Pathway         | SPCC16C4.10                                                                            | 3.1.1.31  |
| 6-phosphogluconolactonase                                   | Cytosol         | 6pgl + H2O -> 6pgc + H                                                                                                                             | Pentose Phosphate Pathway         | SPBC32F12.10<br>SPCC1840.05c                                                           | 5.4.2.2   |
| phosphoglucomutase                                          | Cytosol         | g1p <> G6P                                                                                                                                         | Pentose Phosphate Pathway         | SPBC32F12.10<br>SPCC1840.05c                                                           | 5.4.2.2   |
| phosphopentomutase                                          | Cytosol         | r1p <> R5P                                                                                                                                         | Pentose Phosphate Pathway         | SPBC16G5.02c                                                                           | 2.7.1.15  |
| ribokinase                                                  | Cytosol         | ATP + rib-D -> ADP + H + R5P                                                                                                                       | Pentose Phosphate Pathway         | SPAC31G5.05c                                                                           | 5.1.3.1   |
| ribulose 5-phosphate 3-ePimerase                            | Cytosol         | ru5p-D <> xu5p-D                                                                                                                                   | Pentose Phosphate Pathway         | SPAC144.12                                                                             | 5.3.1.6   |
| ribose-5-phosphate isomerase                                | Cytosol         | R5P <> ru5p-D                                                                                                                                      | Pentose Phosphate Pathway         | SPCC1020.06c                                                                           | 2.2.1.2   |
| transaldolase                                               | Cytosol         | G3P + s7p <> E4P + F6P                                                                                                                             | Pentose Phosphate Pathway         | SPBC2G5.05                                                                             | 2.2.1.1   |
| transketolase                                               | Cytosol         | R5P + xu5p-D <> G3P + s7p                                                                                                                          | Pentose Phosphate Pathway         | SPBC2G5.05                                                                             | 2.2.1.1   |
| transketolase                                               | Cytosol         | E4P + xu5p-D <> F6P + G3P                                                                                                                          | Pentose Phosphate Pathway         | SPAC23D3.11                                                                            |           |
| acyldihydroxyacetonephosphate reductase                     | Cytosol         | 1aGLY3p + H + NADPH -> 1AG3P + NADP                                                                                                                | Phospholipid Biosynthesis         |                                                                                        |           |
| 1-Acyl-glycerol-3-phosphate acyltransferase                 | Cytosol         | 0.01 1AG3P + 0.02 C100CoA + 0.06 C120CoA + 0.17 C161CoA + 0.09 C182CoA + 0.24 C181CoA + 0.27 C160CoA + 0.05 C180CoA + 0.1 C140CoA -> CoA + 0.01 pa | Phospholipid Biosynthesis         | SPAC1851.02                                                                            |           |
| CDP-diacylglycerol--serine O-phosphatidyltransferase        | Mitochondria    | CDPdag + GLYC3p <> CMP + H + ppg                                                                                                                   | Phospholipid Biosynthesis         | SPBP18G5.02                                                                            | 2.7.8.5   |
| choline phosphate cytidylyltransferase                      | Cytosol         | CHOLp + CTP + H -> CDPCHOL + PPi                                                                                                                   | Phospholipid Biosynthesis         | SPCC1827.02c                                                                           |           |
| Choline kinase                                              | Cytosol         | ATP + CHOL -> ADP + CHOLp + H                                                                                                                      | Phospholipid Biosynthesis         | SPAC13G7.12c                                                                           |           |
| diacylglycerol pyrophosphate phosphatase                    | Cytosol         | H2O + 0.01 pa -> 0.01 12dgr + Pi                                                                                                                   | Phospholipid Biosynthesis         | SPBC409.18                                                                             |           |
| CDP-Diacylglycerol synthetase                               | Cytosol         | CTP + H + 0.01 pa <> 0.01 CDPdag + PPi                                                                                                             | Phospholipid Biosynthesis         | SPBC13A2.03                                                                            |           |
| CDP-Diacylglycerol synthetase                               | Mitochondria    | CTP + H + 0.01 pa <> 0.01 CDPdag + PPi                                                                                                             | Phospholipid Biosynthesis         | SPBC13A2.03                                                                            |           |
| Ethanolamine kinase                                         | Cytosol         | ATP + etHa -> ADP + etHAMP + H                                                                                                                     | Phospholipid Biosynthesis         | SPAC13G7.12c                                                                           |           |
| Ethanolaminophosphotransferase                              | Cytosol         | 0.01 12dgr + CDPEA <> CMP + H + 0.01 pe                                                                                                            | Phospholipid Biosynthesis         | SPAC22A12.10                                                                           |           |
| glycerol 3-phosphate acyltransferase (glycerol 3-phosphate) | Cytosol         | 0.02 C100CoA + 0.06 C120CoA + GLYC3p + 0.17 C161CoA + 0.09 C182CoA + 0.24 C181CoA + 0.27 C160CoA + 0.05 C180CoA + 0.1 C140CoA -> 0.01 1AG3P + CoA  | Phospholipid Biosynthesis         | SPBC1718.04                                                                            |           |
| glycerol 3-phosphate acyltransferase (glycerone phosphate)  | Cytosol         | 0.02 C100CoA + 0.06 C120CoA + DHAP + 0.17 C161CoA + 0.09 C182CoA + 0.24 C181CoA + 0.27 C160CoA + 0.05 C180CoA + 0.1 C140CoA -> 0.01 1aGLY3p + CoA  | Phospholipid Biosynthesis         | SPBC1718.04                                                                            |           |
| Lyso-phosphatidylcholine acyltransferase acyltransferase    | Cytosol         | 0.01 1agpc + 0.02 C100CoA + 0.06 C120CoA + 0.17 C161CoA + 0.09 C182CoA + 0.24 C181CoA + 0.27 C160CoA + 0.05 C180CoA + 0.1 C140CoA -> CoA + 0.01 pc | Phospholipid Biosynthesis         |                                                                                        |           |
| liPid phosphate phosphatase                                 | Cytosol         | 0.01 dagpy + H2O -> H + 0.01 pa + Pi                                                                                                               | Phospholipid Biosynthesis         | SPBC409.18                                                                             |           |
| methylene-fatty-acyl-phospholiPid synthase                  | Cytosol         | SAM + 0.01 ptdmeeta -> SAH + H + 0.01 ptd2meeta                                                                                                    | Phospholipid Biosynthesis         | SPBC337.16                                                                             |           |
| inositol-1,3,4,5,6-pentakisphosphate 2-kinase               | Nucleus         | ATP + mi13456p -> ADP + H + mi13456p                                                                                                               | Phospholipid Biosynthesis         | SPCC4B3.10c                                                                            |           |
| inositol-1,3,4,5-triphosphate 6-kinase                      | Nucleus         | ATP + mi1345p -> ADP + H + mi13456p                                                                                                                | Phospholipid Biosynthesis         | SPAC607.04                                                                             |           |
| inositol-1,4,5,6-tetrakisphosphate 3-kinase                 | Nucleus         | ATP + mi1456p -> ADP + H + mi13456p                                                                                                                | Phospholipid Biosynthesis         | SPAC607.04                                                                             |           |
| inositol-1,4,5-triphosphate 6-kinase                        | Nucleus         | ATP + mi145p -> ADP + H + mi1456p                                                                                                                  | Phospholipid Biosynthesis         | SPAC607.04                                                                             |           |
| inositol-1,4,5-trisphosphate 3-kinase                       | Nucleus         | ATP + mi145p -> ADP + H + mi1345p                                                                                                                  | Phospholipid Biosynthesis         | SPAC607.04                                                                             |           |
| myo-inositol 1-phosphatase                                  | Cytosol         | H2O + mi1p-D -> inost + Pi                                                                                                                         | Phospholipid Biosynthesis         |                                                                                        |           |
| myo-Inositol-1-phosphate synthase                           | Cytosol         | G6P -> mi1p-D                                                                                                                                      | Phospholipid Biosynthesis         |                                                                                        |           |
| phosphatidate kinase                                        | Cytosol         | ATP + 0.01 pa -> ADP + 0.01 dagpy                                                                                                                  | Phospholipid Biosynthesis         |                                                                                        |           |
| phosphoethanolamine cytidyltransferase                      | Cytosol         | CTP + etHAMP + H -> CDPEA + PPi                                                                                                                    | Phospholipid Biosynthesis         | SPAC15E1.05c                                                                           |           |
| phosphatidylethanolamine N-methyltransferase Cho2           | Cytosol         | SAM + 0.01 pe -> SAH + H + 0.01 ptdmeeta                                                                                                           | Phospholipid Biosynthesis         | SPBC26H8.03                                                                            |           |
| phosphatidylglycerol phosphate phosphatase A                | Mitochondria    | H2O + ppg -> pg + Pi                                                                                                                               | Phospholipid Biosynthesis         |                                                                                        | 3.1.3.27  |
|                                                             | Mitochondria    | pg + CDPdag -> cl + CMP                                                                                                                            | Phospholipid Biosynthesis         |                                                                                        |           |
| 1-phosphatidylinositol-3,5-bisphosphate 5-phosphatase       | Cytosol         | H2O + 0.01 ptd135bp -> Pi + 0.01 ptd3ino                                                                                                           | Phospholipid Biosynthesis         | SPAC3C7.01c<br>SPBC19F5.03<br>SPAC9G1.10c                                              | 2.7.1.150 |
| phosphatidylinositol-3-phosphate 4-kinase                   | Cytosol         | ATP + 0.01 ptd3ino -> ADP + H + 0.01 ptd134bp                                                                                                      | Phospholipid Biosynthesis         |                                                                                        |           |
| phosphatidylinositol-3-phosphate 5-kinase                   | Cytosol         | ATP + 0.01 ptd3ino -> ADP + H + 0.01 ptd135bp                                                                                                      | Phospholipid Biosynthesis         | SPBC3E7.01                                                                             |           |
| 1-phosphatidylinositol-4,5-bisphosphate 5-phosphatase       | Cytosol         | H2O + 0.01 ptd145bp -> Pi + 0.01 ptd4ino                                                                                                           | Phospholipid Biosynthesis         | SPBC2G2.02<br>SPBC577.13                                                               | 2.7.1.68  |
| 1-phosphatidylinositol-4,5-bisphosphate phosphodiesterase   | Cytosol         | H2O + 0.01 ptd145bp -> 0.01 12dgr + H + mi145p                                                                                                     | Phospholipid Biosynthesis         | SPAC22F8.11                                                                            |           |
| phosphatidylinositol-4-phosphate 5-kinase                   | Cytosol         | ATP + 0.01 ptd4ino -> ADP + H + 0.01 ptd145bp                                                                                                      | Phospholipid Biosynthesis         | SPAC19G12.14                                                                           |           |
| 1-phosphatidylinositol 3-kinase                             | Cytosol         | ATP + 0.01 ptd1ino -> ADP + H + 0.01 ptd3ino                                                                                                       | Phospholipid Biosynthesis         | SPBC216.07c<br>SPBC30D10.10C<br>SPAC22E12.16c<br>SPBC577.06c                           |           |
| phosphatidylinositol 4-kinase                               | Cytosol         | ATP + 0.01 ptd1ino -> ADP + H + 0.01 ptd4ino                                                                                                       | Phospholipid Biosynthesis         | SPAC22E12.16c                                                                          |           |
| phosphatidylinositol 4-kinase                               | Nucleus         | ATP + 0.01 ptd1ino -> ADP + H + 0.01 ptd4ino                                                                                                       | Phospholipid Biosynthesis         |                                                                                        |           |
| phosphatidylinositol synthase                               | Cytosol         | 0.01 CDPdag + inost -> CMP + H + 0.01 ptd1ino                                                                                                      | Phospholipid Biosynthesis         |                                                                                        |           |
| Phosphatidyl-N-methylethanolamine N-methyltransferase       | Cytosol         | SAM + 0.01 ptd2meeta -> SAH + H + 0.01 pc                                                                                                          | Phospholipid Biosynthesis         | SPBC337.16                                                                             |           |
| phosphatidylserine decarboxylase                            | Golgi apparatus | H + 0.01 ps -> CO2 + 0.01 pe                                                                                                                       | Phospholipid Biosynthesis         | SPAC25B8.03<br>SPBC16E9.18<br>SPAC31G5.15<br>SPAC25B8.03<br>SPBC16E9.18<br>SPAC31G5.15 |           |
| phosphatidylserine decarboxylase                            | Mitochondria    | H + 0.01 ps -> CO2 + 0.01 pe                                                                                                                       | Phospholipid Biosynthesis         |                                                                                        |           |

|                                                                    |                 |                                                                                                                                                |                                      |                                                                                                                                                                                                                                   |                                                 |
|--------------------------------------------------------------------|-----------------|------------------------------------------------------------------------------------------------------------------------------------------------|--------------------------------------|-----------------------------------------------------------------------------------------------------------------------------------------------------------------------------------------------------------------------------------|-------------------------------------------------|
| phosphatidylserine decarboxylase                                   | Vacuole         | $H + 0.01 ps \rightarrow CO_2 + 0.01 pe$                                                                                                       | Phospholipid Biosynthesis            | SPAC25B8.03<br>SPBC16E9.18<br>SPAC31G5.15                                                                                                                                                                                         |                                                 |
| phosphatidylserine synthase                                        | Cytosol         | $0.01 CDPdag + SER \leftrightarrow CMP + H + 0.01 ps$                                                                                          | Phospholipid Biosynthesis            | SPCC1442.12                                                                                                                                                                                                                       |                                                 |
| phosphatidylserine synthase                                        | Mitochondria    | $0.01 CDPdag + SER \leftrightarrow CMP + H + 0.01 ps$                                                                                          | Phospholipid Biosynthesis            | SPCC1442.12<br>SPAC1786.02<br>SPAC977.09C<br>SPCC1450.09C<br>SPAC1A6.03C<br>SPBC1348.10C<br>SPAC1A6.04C<br>SPAC1786.02<br>SPAC977.09C<br>SPCC1450.09C<br>SPAC1A6.03C<br>SPBC1348.10C<br>SPAC1A6.04C<br>SPAC1786.02<br>SPAC977.09C |                                                 |
| phospholipase B (phosphatidylinositol) (extracellular)             | Extracellular   | $H_2O + 0.005 ptdlino \rightarrow 0.02 C100 + 0.06 C120 + 0.5 G3Pi + H + 0.27 C160 + 0.17 C161 + 0.05 C180 + 0.24 C181 + 0.09 C182 + 0.1 C140$ | Phospholipid Metabolism              | SPAC1450.09C<br>SPAC1A6.03C<br>SPBC1348.10C<br>SPAC1A6.04C<br>SPAC1786.02<br>SPAC977.09C<br>SPCC1450.09C<br>SPAC1A6.03C<br>SPBC1348.10C<br>SPAC1A6.04C<br>SPAC1786.02<br>SPAC977.09C                                              |                                                 |
| phospholipase B (phosphatidylcholine)                              | Cytosol         | $H_2O + 0.005 pc \rightarrow 0.02 C100 + 0.06 C120 + 0.5 G3Pc + H + 0.27 C160 + 0.17 C161 + 0.05 C180 + 0.24 C181 + 0.09 C182 + 0.1 C140$      | Phospholipid Metabolism              | SPCC1450.09C<br>SPAC1A6.03C<br>SPBC1348.10C<br>SPAC1A6.04C<br>SPAC1786.02<br>SPAC977.09C                                                                                                                                          |                                                 |
| phospholipase B (phosphatidylcholine) (extracellular)              | Extracellular   | $H_2O + 0.005 pc \rightarrow 0.02 C100 + 0.06 C120 + 0.5 G3Pc + H + 0.27 C160 + 0.17 C161 + 0.05 C180 + 0.24 C181 + 0.09 C182 + 0.1 C140$      | Phospholipid Metabolism              | SPCC1450.09C<br>SPAC1A6.03C<br>SPBC1348.10C<br>SPAC1A6.04C                                                                                                                                                                        |                                                 |
| phospholipase D                                                    | Cytosol         | $H_2O + 0.01 pc \rightarrow CHOL + H + 0.01 pa$                                                                                                | Phospholipid Metabolism              | SPAC2F7.16c                                                                                                                                                                                                                       |                                                 |
| 5-diphosphoinositol-1,2,3,4,6-pentakisphosphate diphosphohydrolase | Cytosol         | $H_2O + ppmi12346p \rightarrow H + minoHp + Pi$                                                                                                | Phospholipid Metabolism              | SPAC13G6.14                                                                                                                                                                                                                       |                                                 |
| 5-diphosphoinositol-1,2,3,4,6-pentakisphosphate synthase           | Cytosol         | $ATP + minoHp \rightarrow ADP + ppmi12346p$                                                                                                    | Phospholipid Metabolism              | SPCC970.08                                                                                                                                                                                                                        |                                                 |
| diphosphoinositol-1,3,4,6-tetrakisphosphate diphosphohydrolase     | Cytosol         | $H_2O + ppmi1346p \rightarrow H + mi13456p + Pi$                                                                                               | Phospholipid Metabolism              | SPAC13G6.14                                                                                                                                                                                                                       |                                                 |
| diphosphoinositol-1,3,4,6-tetrakisphosphate synthase               | Cytosol         | $ATP + mi13456p \rightarrow ADP + ppmi1346p$                                                                                                   | Phospholipid Metabolism              | SPCC970.08                                                                                                                                                                                                                        |                                                 |
| protoporphyrinogen oxidase                                         | Cytosol         | $3 O_2 + 2 pppg9 \rightarrow 6 H_2O + 2 ppp9$                                                                                                  | Porphyrin and Chlorophyll Metabolism | SPAC1F5.07c                                                                                                                                                                                                                       | 1.3.3.4                                         |
| protoporphyrinogen oxidase                                         | Nucleus         | $3 O_2 + 2 pppg9 \rightarrow 6 H_2O + 2 ppp9$                                                                                                  | Porphyrin and Chlorophyll Metabolism | SPAC1F5.07c                                                                                                                                                                                                                       | 1.3.3.4                                         |
| coproporphyrinogen oxidase (O2 required)                           | Mitochondria    | $cpppg3 + 2 H + O_2 \rightarrow 2 CO_2 + 2 H_2O + pppg9$                                                                                       | Porphyrin and Chlorophyll Metabolism | SPAC222.11                                                                                                                                                                                                                        | 1.3.3.3                                         |
| porphobilinogen synthase                                           | Nucleus         | $2 5aop \rightarrow H + 2 H_2O + ppbng$                                                                                                        | Porphyrin and Chlorophyll Metabolism | SPAC1805.06c                                                                                                                                                                                                                      | 4.2.1.24                                        |
| uroporphyrinogen decarboxylase (uroporphyrinogen III)              | Nucleus         | $4 H + uppg3 \rightarrow 4 CO_2 + cpppg3$                                                                                                      | Porphyrin and Chlorophyll Metabolism | SPCC4B3.05c                                                                                                                                                                                                                       | 4.1.1.37                                        |
| coproporphyrinogen oxidase (O2 required)                           | Nucleus         | $cpppg3 + 2 H + O_2 \rightarrow 2 CO_2 + 2 H_2O + pppg9$                                                                                       | Porphyrin and Chlorophyll Metabolism | SPAC222.11                                                                                                                                                                                                                        | 1.3.3.3                                         |
| sirohydrochlorin dehydrogenase                                     | Nucleus         | $dscl + NADP \rightarrow H + NADPH + scl$                                                                                                      | Porphyrin and Chlorophyll Metabolism | SPAC4D7.06c                                                                                                                                                                                                                       | 1.3.1.76,<br>4.99.1.4,<br>1.3.1.76,<br>4.99.1.4 |
| sirohydrochlorin ferrocetalase                                     | Nucleus         | $fe2 + scl \rightarrow 3 H + sHEME$                                                                                                            | Porphyrin and Chlorophyll Metabolism | SPAC4D7.06c                                                                                                                                                                                                                       | 1.3.1.76,<br>4.99.1.4                           |
| hydroxymethylbilane synthase                                       | Nucleus         | $H_2O + 4 ppbng \rightarrow HMBIL + 4 NH_4$                                                                                                    | Porphyrin and Chlorophyll Metabolism | SPAC24B11.13                                                                                                                                                                                                                      | 2.5.1.61                                        |
| uroporphyrinogen-III synthase                                      | Nucleus         | $HMBIL \rightarrow H_2O + uppg3$                                                                                                               | Porphyrin and Chlorophyll Metabolism | SPAC31G5.08                                                                                                                                                                                                                       | 4.2.1.75                                        |
| 5-aminolevulinatase synthase                                       | Mitochondria    | $GLY + H + SUCCoA \rightarrow 5aop + CO_2 + CoA$                                                                                               | Porphyrin and Chlorophyll Metabolism | SPAC2F3.09                                                                                                                                                                                                                        | 2.3.1.37                                        |
| coproporphyrinogen oxidase (O2 required)                           | Cytosol         | $cpppg3 + 2 H + O_2 \rightarrow 2 CO_2 + 2 H_2O + pppg9$                                                                                       | Porphyrin and Chlorophyll Metabolism | SPAC222.11                                                                                                                                                                                                                        | 1.3.3.3                                         |
| Ferrochelatase                                                     | Cytosol         | $fe2 + ppp9 \rightarrow 2 H + pHEME$                                                                                                           | Porphyrin and Chlorophyll Metabolism | SPCC320.09                                                                                                                                                                                                                        | 4.99.1.1                                        |
| Ferrochelatase                                                     | Nucleus         | $fe2 + ppp9 \rightarrow 2 H + pHEME$                                                                                                           | Porphyrin and Chlorophyll Metabolism | SPCC320.09                                                                                                                                                                                                                        | 4.99.1.1                                        |
| Ferrochelatase                                                     | Mitochondria    | $fe2 + ppp9 \rightarrow 2 H + pHEME$                                                                                                           | Porphyrin and Chlorophyll Metabolism | SPCC320.09                                                                                                                                                                                                                        | 4.99.1.1                                        |
| Heme O monooxygenase                                               | Mitochondria    | $hemeO + NADH + O_2 \rightarrow H_2O + hemeA + NAD$                                                                                            | Porphyrin and Chlorophyll Metabolism | SPAC22E12.10c<br>SPBC3B8.01c                                                                                                                                                                                                      |                                                 |
| Heme O synthase                                                    | Mitochondria    | $FRPP + H_2O + pHEME \rightarrow hemeO + PPI$                                                                                                  | Porphyrin and Chlorophyll Metabolism | SPBC365.02c                                                                                                                                                                                                                       | 2.5.1.-                                         |
| hydroxymethylbilane synthase                                       | Cytosol         | $H_2O + 4 ppbng \rightarrow HMBIL + 4 NH_4$                                                                                                    | Porphyrin and Chlorophyll Metabolism | SPAC24B11.13                                                                                                                                                                                                                      | 2.5.1.61                                        |
| porphobilinogen synthase                                           | Cytosol         | $2 5aop \rightarrow H + 2 H_2O + ppbng$                                                                                                        | Porphyrin and Chlorophyll Metabolism | SPAC1805.06c                                                                                                                                                                                                                      | 4.2.1.24                                        |
| protoporphyrinogen oxidase                                         | Mitochondria    | $3 O_2 + 2 pppg9 \rightarrow 6 H_2O + 2 ppp9$                                                                                                  | Porphyrin and Chlorophyll Metabolism | SPAC1F5.07c                                                                                                                                                                                                                       | 1.3.3.4                                         |
| sirohydrochlorin dehydrogenase                                     | Cytosol         | $dscl + NADP \rightarrow H + NADPH + scl$                                                                                                      | Porphyrin and Chlorophyll Metabolism | SPAC4D7.06c                                                                                                                                                                                                                       | 1.3.1.76,<br>4.99.1.4,<br>1.3.1.76,<br>4.99.1.4 |
| sirohydrochlorin ferrocetalase                                     | Cytosol         | $fe2 + scl \rightarrow 3 H + sHEME$                                                                                                            | Porphyrin and Chlorophyll Metabolism | SPAC4D7.06c                                                                                                                                                                                                                       | 1.3.1.76,<br>4.99.1.4                           |
| uroporphyrinogen methyltransferase                                 | Cytosol         | $2 SAM + uppg3 \rightarrow 2 SAH + dscl + H$                                                                                                   | Porphyrin and Chlorophyll Metabolism | SPCC1739.06c                                                                                                                                                                                                                      |                                                 |
| uroporphyrinogen-III synthase                                      | Cytosol         | $HMBIL \rightarrow H_2O + uppg3$                                                                                                               | Porphyrin and Chlorophyll Metabolism | SPAC31G5.08                                                                                                                                                                                                                       | 4.2.1.75                                        |
| uroporphyrinogen decarboxylase (uroporphyrinogen III)              | Cytosol         | $4 H + uppg3 \rightarrow 4 CO_2 + cpppg3$                                                                                                      | Porphyrin and Chlorophyll Metabolism | SPCC4B3.05c                                                                                                                                                                                                                       | 4.1.1.37                                        |
| phosphoribosylformylglycinamide synthase                           | Golgi apparatus | $ATP + fgar + GLN + H_2O \rightarrow ADP + fgam + GLU + H + Pi$                                                                                | Purine and Pyrimidine Biosynthesis   | SPAC6F12.10c                                                                                                                                                                                                                      | 6.3.5.3                                         |
| Ap4A hydrolase                                                     | Mitochondria    | $ap4a + H_2O \leftrightarrow 2 ADP + 2 H$                                                                                                      | Purine and Pyrimidine Biosynthesis   | SPCC4G3.02                                                                                                                                                                                                                        | 3.6.1.17                                        |
| Fumarate dependent DHORD                                           | Mitochondria    | $DHOR-S + FUM \rightarrow orot + SUCC$                                                                                                         | Purine and Pyrimidine Biosynthesis   | SPAC57A10.12c                                                                                                                                                                                                                     | 1.3.3.1                                         |
| dihydroorotic acid dehydrogenase                                   | Mitochondria    | $DHOR-S + O_2 \rightarrow H_2O_2 + orot$                                                                                                       | Purine and Pyrimidine Biosynthesis   | SPAC57A10.12c                                                                                                                                                                                                                     | 1.3.3.1                                         |
| yUMP synthetase                                                    | Mitochondria    | $R5P + ura \leftrightarrow H_2O + psd5p$                                                                                                       | Purine and Pyrimidine Biosynthesis   | SPCC126.03<br>SPBC11C11.10                                                                                                                                                                                                        | 5.4.99.12                                       |
| adenylosuccinate lyase                                             | Nucleus         | $SAICAR \leftrightarrow aicar + FUM$                                                                                                           | Purine and Pyrimidine Biosynthesis   | SPBC14F5.09c                                                                                                                                                                                                                      | 4.3.2.2                                         |
| phosphoribosylaminoimidazolesuccinocarboxamide synthase            | Nucleus         | $CAIR + ASP + ATP \leftrightarrow SAICAR + ADP + H + Pi$                                                                                       | Purine and Pyrimidine Biosynthesis   | SPBC409.10                                                                                                                                                                                                                        | 6.3.2.6                                         |
| Ap4A hydrolase                                                     | Nucleus         | $ap4a + H_2O \leftrightarrow 2 ADP + 2 H$                                                                                                      | Purine and Pyrimidine Biosynthesis   | SPCC4G3.02                                                                                                                                                                                                                        | 3.6.1.17                                        |
| adenylosuccinate synthase                                          | Nucleus         | $ASP + GTP + IMP \rightarrow dcAMP + GDP + 2 H + Pi$                                                                                           | Purine and Pyrimidine Biosynthesis   | SPAC144.03                                                                                                                                                                                                                        | 6.3.4.4                                         |
| deoxyguanylate kinase (dGMP:ATP)                                   | Nucleus         | $ATP + dGMP \leftrightarrow ADP + dGDP$                                                                                                        | Purine and Pyrimidine Biosynthesis   | SPBC1198.05                                                                                                                                                                                                                       | 2.7.4.8                                         |
| guanylate kinase (GMP:ATP)                                         | Nucleus         | $ATP + GMP \leftrightarrow ADP + GDP$                                                                                                          | Purine and Pyrimidine Biosynthesis   | SPBC1198.05                                                                                                                                                                                                                       | 2.7.4.8                                         |
| URidine kinase (ATP:URidine)                                       | Nucleus         | $ATP + URI \rightarrow ADP + H + UMP$                                                                                                          | Purine and Pyrimidine Biosynthesis   | SPCC162.11c                                                                                                                                                                                                                       | 2.7.1.48                                        |
| 3',5'-cyclic-nucleotide phosphodiesterase                          | Nucleus         | $cAMP + H_2O \rightarrow AMP + H$                                                                                                              | Purine and Pyrimidine Biosynthesis   | SPCC285.09c                                                                                                                                                                                                                       | 3.1.4.17                                        |
| cytidine deaminase                                                 | Nucleus         | $cytd + H + H_2O \rightarrow NH_4 + URI$                                                                                                       | Purine and Pyrimidine Biosynthesis   | SPAC1556.04c                                                                                                                                                                                                                      | 3.5.4.5                                         |
| guanylate kinase (GMP:dATP)                                        | Nucleus         | $dATP + GMP \leftrightarrow dADP + GDP$                                                                                                        | Purine and Pyrimidine Biosynthesis   | SPBC1198.05                                                                                                                                                                                                                       | 2.7.4.8                                         |
| adenylosuccinate lyase                                             | Nucleus         | $dcAMP \leftrightarrow AMP + FUM$                                                                                                              | Purine and Pyrimidine Biosynthesis   | SPBC14F5.09c                                                                                                                                                                                                                      | 4.3.2.2                                         |
| dCMP deaminase                                                     | Nucleus         | $dCMP + H + H_2O \leftrightarrow dUMP + NH_4$                                                                                                  | Purine and Pyrimidine Biosynthesis   | SPBC2G2.13c                                                                                                                                                                                                                       | 3.5.4.12                                        |
| deoxyURidine phosphorylase                                         | Nucleus         | $dURI + Pi \leftrightarrow 2dr1p + ura$                                                                                                        | Purine and Pyrimidine Biosynthesis   | SPAC1805.16c                                                                                                                                                                                                                      | 2.4.2.1                                         |
| dUTP diphosphatase                                                 | Nucleus         | $dUTP + H_2O \rightarrow dUMP + H + PPI$                                                                                                       | Purine and Pyrimidine Biosynthesis   | SPAC644.05c                                                                                                                                                                                                                       | 3.6.1.23                                        |
| URidine kinase (GTP:URidine)                                       | Nucleus         | $GTP + URI \rightarrow GDP + H + UMP$                                                                                                          | Purine and Pyrimidine Biosynthesis   | SPCC162.11c                                                                                                                                                                                                                       | 2.7.1.48                                        |
| thioredoxin reductase (NADPH)                                      | Nucleus         | $H + NADPH + TRDox \rightarrow NADP + TRDrd$                                                                                                   | Purine and Pyrimidine Biosynthesis   | SPBC3F6.03<br>SPAC7D4.07c                                                                                                                                                                                                         | 1.8.1.9                                         |
| orotidine-5'-phosphate decarboxylase                               | Nucleus         | $H + orot5p \rightarrow CO_2 + UMP$                                                                                                            | Purine and Pyrimidine Biosynthesis   | SPCC330.05c                                                                                                                                                                                                                       | 4.1.1.23                                        |
| orotate phosphoribosyltransferase                                  | Nucleus         | $orot5p + PPI \leftrightarrow orot + PRPP$                                                                                                     | Purine and Pyrimidine Biosynthesis   | SPBC725.15                                                                                                                                                                                                                        | 2.4.2.10                                        |
| thymidine phosphorylase                                            | Nucleus         | $Pi + THYMD \leftrightarrow 2dr1p + THYM$                                                                                                      | Purine and Pyrimidine Biosynthesis   | SPAC1805.16c                                                                                                                                                                                                                      | 2.4.2.1                                         |
| uracil phosphoribosyltransferase                                   | Nucleus         | $PRPP + ura \rightarrow PPI + UMP$                                                                                                             | Purine and Pyrimidine Biosynthesis   | SPAC1399.04c<br>SPAC1B3.01c<br>SPCC16C4.06c                                                                                                                                                                                       | 2.4.2.9                                         |
| yUMP synthetase                                                    | Nucleus         | $R5P + ura \leftrightarrow H_2O + psd5p$                                                                                                       | Purine and Pyrimidine Biosynthesis   | SPCC126.03<br>SPBC11C11.10                                                                                                                                                                                                        | 5.4.99.12                                       |
| adenylate cyclase                                                  | Cytosol         | $ATP \rightarrow cAMP + PPI$                                                                                                                   | Purine and Pyrimidine Biosynthesis   | SPBC19C7.03                                                                                                                                                                                                                       | 4.6.1.1                                         |
| adenylosuccinate lyase                                             | Cytosol         | $dcAMP \leftrightarrow AMP + FUM$                                                                                                              | Purine and Pyrimidine Biosynthesis   | SPBC14F5.09c                                                                                                                                                                                                                      | 4.3.2.2                                         |
| adenylosuccinate lyase                                             | Cytosol         | $SAICAR \leftrightarrow aicar + FUM$                                                                                                           | Purine and Pyrimidine Biosynthesis   | SPBC14F5.09c                                                                                                                                                                                                                      | 4.3.2.2                                         |
| adenylosuccinate synthase                                          | Cytosol         | $ASP + GTP + IMP \rightarrow dcAMP + GDP + 2 H + Pi$                                                                                           | Purine and Pyrimidine Biosynthesis   | SPAC144.03                                                                                                                                                                                                                        | 6.3.4.4                                         |

|                                                                 |                 |                                                      |                                    |                                             |                                    |
|-----------------------------------------------------------------|-----------------|------------------------------------------------------|------------------------------------|---------------------------------------------|------------------------------------|
| phosphoribosylaminoimidazolecarboxamide formyltransferase       | Cytosol         | 10FTHF + aicar <> frpica + THF                       | Purine and Pyrimidine Biosynthesis | SPCPB16A4.03c                               | 2.1.2.3, 3.5.4.10                  |
| phosphoribosylaminoimidazole carboxylase                        | Cytosol         | air + CO2 <> CAIR + H                                | Purine and Pyrimidine Biosynthesis | SPCC1322.13                                 | 4.1.1.21                           |
| Adenosine monophosphate deaminase                               | Cytosol         | AMP + H + H2O -> IMP + NH4                           | Purine and Pyrimidine Biosynthesis | SPBC106.04                                  | 3.5.4.6                            |
| Ap4A hydrolase                                                  | Cytosol         | ap4a + H2O <> 2 ADP + 2 H                            | Purine and Pyrimidine Biosynthesis | SPCC4G3.02                                  | 3.6.1.17                           |
| aspartate carbamoyltransferase                                  | Cytosol         | ASP + cbp -> cbasp + H + Pi                          | Purine and Pyrimidine Biosynthesis | SPAC22G7.06c<br>SPAC16.03c<br>SPBC56F2.09c  | 6.3.5.5, 2.1.3.2                   |
| ATP adenyltransferase                                           | Cytosol         | ADP + ATP + H -> ap4a + Pi                           | Purine and Pyrimidine Biosynthesis |                                             |                                    |
| CTP synthase (NH3)                                              | Cytosol         | ATP + NH4 + UTP -> ADP + CTP + 2 H + Pi              | Purine and Pyrimidine Biosynthesis | SPAC10F6.03c                                | 6.3.4.2                            |
| CTP synthase (glutamine)                                        | Cytosol         | ATP + GLN + H2O + UTP -> ADP + CTP + GLU + 2 H + Pi  | Purine and Pyrimidine Biosynthesis | SPAC10F6.03c                                | 6.3.4.2                            |
| cytidine deaminase                                              | Cytosol         | cytd + H + H2O -> NH4 + URI                          | Purine and Pyrimidine Biosynthesis | SPAC1556.04c                                | 3.5.4.5                            |
| dCMP deaminase                                                  | Cytosol         | dCMP + H + H2O <> dUMP + NH4                         | Purine and Pyrimidine Biosynthesis | SPBC2G2.13c                                 | 3.5.4.12                           |
| deoxyguanylate kinase (dGMP:ATP)                                | Cytosol         | ATP + dGMP <> ADP + dGDP                             | Purine and Pyrimidine Biosynthesis | SPBC1198.05                                 | 2.7.4.8                            |
| dihydroorotic acid (ubiquinone-6)                               |                 | DHOR-S[c] + Q6[m] -> orot[c] + Q6H2[m]               | Purine and Pyrimidine Biosynthesis | SPAC57A10.12c                               | 1.3.3.1, 6.3.5.5, 2.1.3.2, 3.5.2.3 |
| dihydroorotase                                                  | Cytosol         | DHOR-S + H2O <> cbasp + H                            | Purine and Pyrimidine Biosynthesis | SPAC22G7.06c<br>SPAC16.03c                  | 6.3.5.5, 2.1.3.2, 3.5.2.3          |
| deoxyURidine kinase (ATP:DeoxyURidine)                          | Cytosol         | ATP + dURI -> ADP + dUMP + H                         | Purine and Pyrimidine Biosynthesis |                                             |                                    |
| deoxyURidine phosphorylase                                      | Cytosol         | dURI + Pi <> 2drIp + ura                             | Purine and Pyrimidine Biosynthesis | SPAC1805.16c                                | 2.4.2.1                            |
| dUTP diphosphatase                                              | Cytosol         | dUTP + H2O -> dUMP + H + PPi                         | Purine and Pyrimidine Biosynthesis | SPAC644.05c                                 | 3.6.1.23                           |
| guanylate kinase (GMP:ATP)                                      | Cytosol         | ATP + GMP <> ADP + GDP                               | Purine and Pyrimidine Biosynthesis | SPBC1198.05                                 | 2.7.4.8                            |
| guanylate kinase (GMP:dATP)                                     | Cytosol         | dATP + GMP <> dADP + GDP                             | Purine and Pyrimidine Biosynthesis | SPBC1198.05                                 | 2.7.4.8                            |
| glutamine phosphoribosyl diphosphate amidotransferase           | Cytosol         | GLN + H2O + PRPP -> GLU + PPi + pram                 | Purine and Pyrimidine Biosynthesis | SPAC4D7.08c                                 | 2.4.2.14                           |
| GMP synthase                                                    | Cytosol         | ATP + GLN + H2O + XMP -> AMP + GLU + GMP + 2 H + PPi | Purine and Pyrimidine Biosynthesis | SPAP7G5.02c                                 | 6.3.5.2                            |
| IMP cyclohydrolase                                              | Cytosol         | H2O + IMP <> frpica                                  | Purine and Pyrimidine Biosynthesis | SPCPB16A4.03c                               | 2.1.2.3, 3.5.4.10                  |
| IMP dehydrogenase                                               | Cytosol         | H2O + IMP + NAD -> H + NADH + XMP                    | Purine and Pyrimidine Biosynthesis | SPBC2F12.14c                                | 1.1.1.205                          |
| orotidine-5'-phosphate decarboxylase                            | Cytosol         | H + orot5p -> CO2 + UMP                              | Purine and Pyrimidine Biosynthesis | SPCC330.05c                                 | 4.1.1.23                           |
| orotate phosphoribosyltransferase                               | Cytosol         | orot5p + PPi <> orot + PRPP                          | Purine and Pyrimidine Biosynthesis | SPBC725.15                                  | 2.4.2.10                           |
| 3',5'-cyclic-nucleotide phosphodiesterase                       | Cytosol         | cAMP + H2O -> AMP + H                                | Purine and Pyrimidine Biosynthesis | SPCC285.09c                                 | 3.1.4.17                           |
| 3',5'-cyclic-nucleotide phosphodiesterase                       | Cytosol         | 35cdAMP + H2O -> dAMP + H                            | Purine and Pyrimidine Biosynthesis | SPCC285.09c                                 | 3.1.4.17                           |
| 3',5'-cyclic-nucleotide phosphodiesterase                       | Cytosol         | 35cIMP + H2O -> H + IMP                              | Purine and Pyrimidine Biosynthesis | SPCC285.09c                                 | 3.1.4.17                           |
| 3',5'-cyclic-nucleotide phosphodiesterase                       | Cytosol         | 35cGMP + H2O -> GMP + H                              | Purine and Pyrimidine Biosynthesis | SPCC285.09c                                 | 3.1.4.17                           |
| 3',5'-cyclic-nucleotide phosphodiesterase                       | Cytosol         | 35cCMP + H2O -> CMP + H                              | Purine and Pyrimidine Biosynthesis | SPCC285.09c                                 | 3.1.4.17                           |
| phosphoribosylglycinamide synthase                              | Cytosol         | ATP + GLY + pram <> ADP + gar + H + Pi               | Purine and Pyrimidine Biosynthesis | SPBC405.01                                  | 6.3.4.13, 6.3.3.1                  |
| phosphoribosylaminoimidazole synthase                           | Cytosol         | ATP + fgam -> ADP + air + 2 H + Pi                   | Purine and Pyrimidine Biosynthesis | SPBC405.01                                  | 6.3.4.13, 6.3.3.1                  |
| phosphoribosylaminoimidazole succinocarboxamide synthase        | Cytosol         | CAIR + ASP + ATP <> SAICAR + ADP + H + Pi            | Purine and Pyrimidine Biosynthesis | SPBC409.10                                  | 6.3.2.6                            |
| phosphoribosylformylglycinamide synthase                        | Cytosol         | ATP + fgam + GLN + H2O -> ADP + fgam + GLU + H + Pi  | Purine and Pyrimidine Biosynthesis | SPAC6F12.10c                                | 6.3.5.3                            |
| thymidine kinase (ATP:thymidine)                                | Cytosol         | ATP + THYMD -> ADP + dTMP + H                        | Purine and Pyrimidine Biosynthesis |                                             |                                    |
| thymidine phosphorylase                                         | Cytosol         | Pi + THYMD <> 2drIp + THYM                           | Purine and Pyrimidine Biosynthesis | SPAC1805.16c                                | 2.4.2.1                            |
| thymidylate synthase                                            | Cytosol         | dUMP + MLTHF -> DHF + dTMP                           | Purine and Pyrimidine Biosynthesis | SPAC15E1.04                                 | 2.1.1.45                           |
| thioredoxin reductase (NADPH)                                   | Cytosol         | H + NADPH + TRDox -> NADP + TRDrd                    | Purine and Pyrimidine Biosynthesis | SPBC3F6.03<br>SPAC7D4.07c                   | 1.8.1.9                            |
| thioredoxin reductase (NADPH)                                   | Mitochondria    | H + NADPH + TRDox -> NADP + TRDrd                    | Purine and Pyrimidine Biosynthesis | SPBC3F6.03<br>SPBC12D12.07c<br>SPAC1002.17c | 1.8.1.9                            |
| uracil phosphoribosyltransferase                                | Cytosol         | PRPP + ura -> PPI + UMP                              | Purine and Pyrimidine Biosynthesis | SPAC1399.04c<br>SPAC1B3.01c                 | 2.4.2.9                            |
| URidine kinase (ATP:URidine)                                    | Cytosol         | ATP + URI -> ADP + H + UMP                           | Purine and Pyrimidine Biosynthesis | SPCC162.11c                                 | 2.7.1.48                           |
| URidine kinase (GTP:URidine)                                    | Cytosol         | GTP + URI -> GDP + H + UMP                           | Purine and Pyrimidine Biosynthesis | SPCC162.11c                                 | 2.7.1.48                           |
| yUMP synthetase                                                 | Cytosol         | R5p + ura <> H2O + psd5p                             | Purine and Pyrimidine Biosynthesis | SPCC16C4.06c                                | 5.4.99.12                          |
| hypothetical enzyme                                             | Cytosol         | H2O + pyam5p -> Pi + pydam                           | Pyridoxine Metabolism              |                                             |                                    |
| O-Phospho-4-hydroxy-L-threonine:2-oxoglutarate aminotransferase | Cytosol         | GLU + oHpb <> AGK + PHTHR                            | Pyridoxine Metabolism              | SPAC1F12.07                                 | 2.6.1.52                           |
| pyridoxine 5'-phosphate oxidase                                 | Cytosol         | O2 + pdx5p <> H2O2 + pydx5p                          | Pyridoxine Metabolism              | SPAC1093.02                                 | 1.4.3.5                            |
| pyridoxamine 5'-phosphate oxidase                               | Cytosol         | H2O + O2 + pyam5p -> H2O2 + NH4 + pydx5p             | Pyridoxine Metabolism              | SPAC1093.02                                 | 1.4.3.5                            |
| pyridoxamine kinase                                             | Cytosol         | ATP + pydam -> ADP + H + pyam5p                      | Pyridoxine Metabolism              |                                             | 2.7.1.35                           |
| pyridoxal kinase                                                | Cytosol         | ATP + pydx -> ADP + H + pydx5p                       | Pyridoxine Metabolism              |                                             |                                    |
| pyridoxine kinase                                               | Cytosol         | ATP + pydxn -> ADP + H + pdx5p                       | Pyridoxine Metabolism              |                                             | 2.7.1.35                           |
| pyridoxine oxidase                                              | Cytosol         | O2 + pydxn <> H2O2 + pydx                            | Pyridoxine Metabolism              | SPAC1093.02                                 | 1.4.3.5                            |
| pyridoxal oxidase                                               | Cytosol         | 2 H2O + NH4 + 0.5 O2 + pydx <> 2 H2O2 + pydam        | Pyridoxine Metabolism              | SPAC1093.02                                 | 1.4.3.5                            |
| D-lactate dehydrogenase                                         | Cytosol         | 2 ficytc + dLAC -> 2 focytc + PYR                    | Pyruvate Metabolism                | SPCC191.07                                  |                                    |
| D-lactate dehydrogenase                                         | Mitochondria    | 2 ficytc + dLAC -> 2 focytc + PYR                    | Pyruvate Metabolism                | SPCC191.07                                  |                                    |
| D-lactate dehydrogenase                                         | Nucleus         | 2 ficytc + dLAC -> 2 focytc + PYR                    | Pyruvate Metabolism                | SPCC191.07                                  |                                    |
| aldehyde dehydrogenase (acetaldehyde, NAD)                      | Cytosol         | ACAL + H2O + NAD -> AC + 2 H + NADH                  | Pyruvate Metabolism                | SPAC9E9.09c                                 | 1.2.1.3                            |
| homocitrate synthase                                            | Cytosol         | ACCoA + AKG + H2O -> CoA + H + HCIT                  | Pyruvate Metabolism                | SPBC1105.02c                                | 2.3.3.14                           |
| acetyl-CoA hydrolase, cytoplasm                                 | Cytosol         | ACCoA + H2O -> AC + CoA + H                          | Pyruvate Metabolism                | SPAC1952.09c                                | 3.1.2.1                            |
| aldehyde dehydrogenase (acetaldehyde, NAD)                      | Golgi apparatus | ACAL + H2O + NAD -> AC + 2 H + NADH                  | Pyruvate Metabolism                | SPAC9E9.09c                                 | 1.2.1.3                            |
| aldehyde dehydrogenase (acetaldehyde, NADP)                     | Golgi apparatus | ACAL + H2O + NADP -> AC + 2 H + NADPH                | Pyruvate Metabolism                | SPAC9E9.09c                                 | 1.2.1.3                            |
| alcohol dehydrogenase (ethanol)                                 | Mitochondria    | ETOH + NAD <> ACAL + H + NADH                        | Pyruvate Metabolism                | SPCC13B11.04c<br>SPBC1539.07c               | 1.1.1.284                          |
| formaldehyde dehydrogenase                                      | Mitochondria    | fald + GTHrd + NAD <> SIGLUtH + H + NADH             | Pyruvate Metabolism                | SPCC13B11.04c<br>SPBC1539.07c               | 1.1.1.284                          |
| aldehyde dehydrogenase (acetaldehyde, NAD)                      | Nucleus         | ACAL + H2O + NAD -> AC + 2 H + NADH                  | Pyruvate Metabolism                | SPAC9E9.09c                                 | 1.2.1.3                            |
| aldehyde dehydrogenase (acetaldehyde, NADP)                     | Nucleus         | ACAL + H2O + NADP -> AC + 2 H + NADPH                | Pyruvate Metabolism                | SPAC9E9.09c                                 | 1.2.1.3                            |
| alcohol dehydrogenase (ethanol)                                 | Nucleus         | ETOH + NAD <> ACAL + H + NADH                        | Pyruvate Metabolism                | SPCC13B11.04c<br>SPBC1539.07c               | 1.1.1.284                          |
| formaldehyde dehydrogenase                                      | Nucleus         | fald + GTHrd + NAD <> SIGLUtH + H + NADH             | Pyruvate Metabolism                | SPCC13B11.04c<br>SPBC1539.07c               | 1.1.1.284                          |
| acetyl-CoA hydrolase                                            | Mitochondria    | ACCoA + H2O -> AC + CoA + H                          | Pyruvate Metabolism                | SPAC1952.09c                                | 3.1.2.1                            |
| acetyl-CoA synthetase                                           | Cytosol         | AC + ATP + CoA -> ACCoA + AMP + PPi                  | Pyruvate Metabolism                | SPCC191.02c                                 | 6.2.1.1                            |
| acetyl-CoA synthetase                                           | Mitochondria    | AC + ATP + CoA -> ACCoA + AMP + PPi                  | Pyruvate Metabolism                | SPCC191.02c                                 | 6.2.1.1                            |
| acetyl-CoA synthetase                                           | Peroxisome      | AC + ATP + CoA -> ACCoA + AMP + PPi                  | Pyruvate Metabolism                | SPCC191.02c                                 | 6.2.1.1                            |
| alcohol dehydrogenase, forward rxn (ethanol -> acetaldehyde)    | Cytosol         | ETOH + NAD -> ACAL + H + NADH                        | Pyruvate Metabolism                | SPCC13B11.01                                | 1.1.1.1                            |
| alcohol dehydrogenase, reverse rxn (acetaldehyde -> ethanol)    | Cytosol         | ACAL + H + NADH -> ETOH + NAD                        | Pyruvate Metabolism                | SPAC5H10.06c                                | 1.1.1.1                            |
| alcohol dehydrogenase, reverse rxn (acetaldehyde -> ethanol)    | Mitochondria    | ACAL + H + NADH -> ETOH + NAD                        | Pyruvate Metabolism                | SPCC13B11.01                                | 1.1.1.1                            |
| alcohol dehydrogenase (ethanol)                                 | Cytosol         | ETOH + NAD <> ACAL + H + NADH                        | Pyruvate Metabolism                | SPCC13B11.04c<br>SPBC1539.07c               | 1.1.1.284                          |
| aldehyde dehydrogenase (acetaldehyde, NAD)                      | Mitochondria    | ACAL + H2O + NAD -> AC + 2 H + NADH                  | Pyruvate Metabolism                | SPAC9E9.09c                                 | 1.2.1.3                            |
| aldehyde dehydrogenase (acetaldehyde, NADP)                     | Cytosol         | ACAL + H2O + NADP -> AC + 2 H + NADPH                | Pyruvate Metabolism                | SPAC9E9.09c                                 | 1.2.1.3                            |

|                                                                              |                       |                                                        |                         |                                                                                                   |           |
|------------------------------------------------------------------------------|-----------------------|--------------------------------------------------------|-------------------------|---------------------------------------------------------------------------------------------------|-----------|
| aldehyde dehydrogenase (acetylaldehyde, NADP)                                | Mitochondria          | ACAL + H2O + NADP -> AC + 2 H + NADPH                  | Pyruvate Metabolism     | SPAC9E9.09c                                                                                       | 1.2.1.3   |
| formaldehyde dehydrogenase                                                   | Cytosol               | fald + GTHrd + NAD <> SfgLUtH + H + NADH               | Pyruvate Metabolism     | SPCC13B11.04c<br>SPBC1539.07c                                                                     | 1.1.1.284 |
| homocitrate synthase                                                         | Mitochondria          | ACCoA + AKG + H2O -> CoA + H + HCIT                    | Pyruvate Metabolism     | SPBC1105.02c                                                                                      | 2.3.3.14  |
| homocitrate synthase                                                         | Nucleus               | ACCoA + AKG + H2O -> CoA + H + HCIT                    | Pyruvate Metabolism     | SPBC1105.02c                                                                                      | 2.3.3.14  |
| L-Lactate dehydrogenaseic                                                    |                       | 2 ficyt[m] + LAC[c] -> 2 focyct[m] + PYR[c]            | Pyruvate Metabolism     | SPCC191.07<br>SPAPB1A.11.03<br>SPCC4G3.04c<br>SPBC337.15c                                         | 1.1.2.3   |
| 2-hexaprenyl-3-methyl-5-hydroxy-6-methoxy-1,4-benzoquinone methyltransferase | Mitochondria          | 20MHMB + SAM -> SAH + H + Q6                           | Quinone Biosynthesis    | SPAC19G12.11<br>SPBC2D10.18<br>SPBC146.12 SPCC162.05<br>SPBC1347.09<br>SPCC4G3.04c<br>SPBC337.15c | 2.1.1.114 |
| 2-Hexaprenyl-6-methoxyphenol monooxygenase                                   | Mitochondria          | 20PMP + O2 -> 20PMB + H2O                              | Quinone Biosynthesis    | SPAC19G12.11<br>SPBC2D10.18<br>SPBC146.12 SPCC162.05<br>SPBC1347.09<br>SPCC4G3.04c<br>SPBC337.15c | 2.1.1.114 |
| 2-hexaprenyl-6-methoxy-1,4-benzoquinone methyltransferase                    | Mitochondria          | 20PMB + SAM -> 20PMMB + SAH + H                        | Quinone Biosynthesis    | SPAC19G12.11<br>SPBC2D10.18<br>SPBC146.12 SPCC162.05<br>SPBC1347.09<br>SPCC4G3.04c<br>SPBC337.15c | 2.1.1.114 |
| 2-hexaprenyl-3-methyl-6-methoxy-1,4-benzoquinone monooxygenase               | Mitochondria          | 20PMMB + 0.5 O2 -> 20MHMB                              | Quinone Biosynthesis    | SPAC19G12.11<br>SPBC2D10.18<br>SPBC146.12 SPCC162.05<br>SPBC1347.09                               | 2.1.1.114 |
| 3-(4-hydroxyphenyl)-lactate formation                                        | Mitochondria          | 34Hpp + H + NADH -> 34Hpl + NAD                        | Quinone Biosynthesis    | SPCC4G3.04c<br>SPBC337.15c                                                                        |           |
| S-adenosyl-L-methionine:3-hexaprenyl-4,5-dihydroxylate O-methyltransferase   | Mitochondria          | 3H45DHBZ + SAM -> 3H45MOBZ + SAH + H                   | Quinone Biosynthesis    | SPAC19G12.11<br>SPBC2D10.18<br>SPBC146.12 SPCC162.05<br>SPBC1347.09                               | 2.1.1.114 |
| 3-Hexaprenyl-4-hydroxy-5-methoxybenzoate decarboxylase                       | Mitochondria          | 3H45MOBZ -> 20PMP + CO2                                | Quinone Biosynthesis    |                                                                                                   |           |
| 3-Hexaprenyl-4,5-dihydroxybenzoate hydroxylase                               | Cytosol               | O4HBZ + 0.5 O2 -> 3H45DHBZ                             | Quinone Biosynthesis    |                                                                                                   |           |
| 4-hydroxybenzoyl-CoA formation                                               | Mitochondria          | CoA + couCoA + H2O + NAD -> 4HbzCoA + ACCoA + H + NADH | Quinone Biosynthesis    |                                                                                                   |           |
| 4-hydroxybenzoate formation                                                  | Mitochondria          | 4HbzCoA + H2O -> 4Hbz + CoA + H                        | Quinone Biosynthesis    |                                                                                                   |           |
| Chorismate pyruvate lyase                                                    | Cytosol               | CHOR -> 4Hbz + PYR                                     | Quinone Biosynthesis    |                                                                                                   |           |
| p-coumaroyl-CoA formation                                                    | Mitochondria          | T4Hcinm + ATP + CoA -> AMP + couCoA + PPi              | Quinone Biosynthesis    |                                                                                                   |           |
| geranylgeranyltransferase                                                    | Cytosol               | GGPP + IPPP -> PNPP + PPi                              | Quinone Biosynthesis    |                                                                                                   |           |
| Hydroxybenzoate C080prenyltransferase                                        | Mitochondria          | 4Hbz + HXPP -> O4HBZ + PPi                             | Quinone Biosynthesis    | SPAC5F68.04c                                                                                      | 2.1.1.114 |
| trans-pentaprenyltransferase                                                 | Mitochondria          | IPPP + PNPP -> HXPP + PPi                              | Quinone Biosynthesis    | SPBPJ4664.01<br>SPAC19G12.12                                                                      | 2.5.1.33  |
| Quinolinate Synthase (Eukaryotic)                                            | Cytosol               | cmuSA -> H + H2O + QuIn                                | Quinone Biosynthesis    |                                                                                                   |           |
| 4-hydroxycinnamate formation                                                 | Mitochondria          | 34Hpl -> T4Hcinm + H2O                                 | Quinone Biosynthesis    |                                                                                                   |           |
|                                                                              | Cytosol               | FRPP + IPPP -> GGPP + PPi                              | Quinone Biosynthesis    |                                                                                                   |           |
| acid phosphatase                                                             | Golgi apparatus       | fmn + H2O -> Pi + ribflv                               | Riboflavin Metabolism   | SPBP4G3.02<br>SPBC428.03c<br>SPBC21H7.03c                                                         | 3.1.3.2   |
| 2,5-diamino-6-ribitylamino-4(3H)-pyrimidinone 5'-phosphate deaminase         | Mitochondria          | 25dtHpp + H + H2O -> 5aprbu + NH4                      | Riboflavin Metabolism   | SPAC18B11.02c<br>SPCC4G3.16                                                                       |           |
| 3,4-Dihydroxy-2-butanone-4-phosphate synthase                                | Mitochondria          | ru5p-D -> db4p + FORM + H                              | Riboflavin Metabolism   | SPBC23E6.06c                                                                                      |           |
| acid phosphatase                                                             | Endoplasmic Reticulum | fmn + H2O -> Pi + ribflv                               | Riboflavin Metabolism   | SPBP4G3.02<br>SPBC428.03c<br>SPBC21H7.03c                                                         | 3.1.3.2   |
| riboflavin synthase                                                          | Nucleus               | 2 dmlz -> 4r5au + ribflv                               | Riboflavin Metabolism   | SPCC1450.13c                                                                                      |           |
| 2,5-diamino-6-ribosylamino-4(3H)-pyrimidinone 5'-phosphate reductase (nADPh) | Nucleus               | 25dHpp + H + NADPH -> 25dtHpp + NADP                   | Riboflavin Metabolism   | SPBC21C3.10c                                                                                      |           |
| 2,5-diamino-6-ribitylamino-4(3H)-pyrimidinone 5'-phosphate deaminase         | Nucleus               | 25dtHpp + H + H2O -> 5aprbu + NH4                      | Riboflavin Metabolism   | SPAC18B11.02c<br>SPCC4G3.16                                                                       |           |
| riboflavin synthase                                                          | Nucleus               | 4r5au + db4p -> dmlz + 2 H2O + Pi                      | Riboflavin Metabolism   | SPBC409.13                                                                                        |           |
| riboflavin kinase                                                            | Nucleus               | ATP + ribflv -> ADP + fmn + H                          | Riboflavin Metabolism   | SPCC18.16c                                                                                        |           |
| FMN reductase                                                                | Nucleus               | fmn + H + NADPH -> fmnH2 + NADP                        | Riboflavin Metabolism   | SPCC4B3.06c                                                                                       |           |
| GTP cyclohydrolase II                                                        | Nucleus               | GTP + 3 H2O -> 25dHpp + FORM + 2 H + PPi               | Riboflavin Metabolism   | SPAP27G11.09c                                                                                     | 3.5.4.25  |
| 3,4-Dihydroxy-2-butanone-4-phosphate synthase                                | Nucleus               | ru5p-D -> db4p + FORM + H                              | Riboflavin Metabolism   | SPBC23E6.06c<br>SPBP4G3.02                                                                        |           |
| acid phosphatase                                                             | Extracellular         | fmn + H2O -> Pi + ribflv                               | Riboflavin Metabolism   | SPBC428.03c<br>SPBC21H7.03c                                                                       | 3.1.3.2   |
| 3,4-Dihydroxy-2-butanone-4-phosphate synthase                                | Cytosol               | ru5p-D -> db4p + FORM + H                              | Riboflavin Metabolism   | SPBC23E6.06c                                                                                      |           |
| 2,5-diamino-6-ribosylamino-4(3H)-pyrimidinone 5'-phosphate reductase (nADPh) | Cytosol               | 25dHpp + H + NADPH -> 25dtHpp + NADP                   | Riboflavin Metabolism   | SPBC21C3.10c                                                                                      |           |
| 2,5-diamino-6-ribitylamino-4(3H)-pyrimidinone 5'-phosphate deaminase         | Cytosol               | 25dtHpp + H + H2O -> 5aprbu + NH4                      | Riboflavin Metabolism   | SPAC18B11.02c<br>SPCC4G3.16                                                                       |           |
| FMN adenylyltransferase                                                      | Cytosol               | ATP + fmn + H -> fad + PPi                             | Riboflavin Metabolism   | SPCC1235.04c                                                                                      | 2.7.7.2   |
| FMN adenylyltransferase                                                      | Nucleus               | ATP + fmn + H -> fad + PPi                             | Riboflavin Metabolism   | SPCC1235.04c                                                                                      | 2.7.7.2   |
| FMN reductase                                                                | Cytosol               | fmn + H + NADPH -> fmnH2 + NADP                        | Riboflavin Metabolism   | SPCC4B3.06c                                                                                       |           |
| GTP cyclohydrolase II                                                        | Cytosol               | GTP + 3 H2O -> 25dHpp + FORM + 2 H + PPi               | Riboflavin Metabolism   | SPAP27G11.09c                                                                                     | 3.5.4.25  |
| pyrimidine phosphatase                                                       | Cytosol               | 5aprbu + H2O -> 4r5au + Pi                             | Riboflavin Metabolism   |                                                                                                   |           |
| riboflavin kinase                                                            | Cytosol               | ATP + ribflv -> ADP + fmn + H                          | Riboflavin Metabolism   | SPCC18.16c                                                                                        |           |
| riboflavin kinase                                                            | Mitochondria          | ATP + ribflv -> ADP + fmn + H                          | Riboflavin Metabolism   | SPCC18.16c                                                                                        |           |
| riboflavin synthase                                                          | Cytosol               | 4r5au + db4p -> dmlz + 2 H2O + Pi                      | Riboflavin Metabolism   | SPBC409.13                                                                                        |           |
| riboflavin synthase                                                          | Cytosol               | 2 dmlz -> 4r5au + ribflv                               | Riboflavin Metabolism   | SPCC1450.13c                                                                                      |           |
| Sulfatide sulfohydrolase                                                     | Cytosol               | gala + SO4 -> sft + H2O                                | Sphingolipid Metabolism | SPBPB10D8.02c                                                                                     | 3.1.6.1   |
| Sulfatide sulfohydrolase                                                     | Nucleus               | gala + SO4 -> sft + H2O                                | Sphingolipid Metabolism | SPBPB10D8.02c                                                                                     | 3.1.6.1   |
| alpha-galactosidase, melibiase                                               | Endoplasmic Reticulum | dgala + H2O -> gala + gal                              | Sphingolipid Metabolism | SPAC869.07c                                                                                       | 3.2.1.22  |
| alpha-galactosidase, melibiase                                               | Extracellular         | dgala + H2O -> gala + gal                              | Sphingolipid Metabolism | SPAC869.07c                                                                                       | 3.2.1.22  |
| Inositol phosphorylceramide synthase (ceramide-1, 24C)                       | Golgi apparatus       | cer124 + 0.01 ptd1ino -> 0.01 12dgr + 0.01 ipc124      | Sphingolipid Metabolism | SPAC3H8.06                                                                                        |           |
| Inositol phosphorylceramide synthase (ceramide-1, 26C)                       | Golgi apparatus       | cer126 + 0.01 ptd1ino -> 0.01 12dgr + 0.01 ipc126      | Sphingolipid Metabolism | SPAC3H8.06                                                                                        |           |
| Inositol phosphorylceramide synthase (ceramide-2, 24C)                       | Golgi apparatus       | cer224 + 0.01 ptd1ino -> 0.01 12dgr + 0.01 ipc224      | Sphingolipid Metabolism | SPAC3H8.06                                                                                        |           |
| Inositol phosphorylceramide synthase (ceramide-2, 26C)                       | Golgi apparatus       | cer226 + 0.01 ptd1ino -> 0.01 12dgr + 0.01 ipc226      | Sphingolipid Metabolism | SPAC3H8.06                                                                                        |           |
| Inositol phosphorylceramide synthase (ceramide-3, 24C)                       | Golgi apparatus       | cer324 + 0.01 ptd1ino -> 0.01 12dgr + 0.01 ipc324      | Sphingolipid Metabolism | SPAC3H8.06                                                                                        |           |

|                                                                       |                       |                                                           |                               |                                            |          |
|-----------------------------------------------------------------------|-----------------------|-----------------------------------------------------------|-------------------------------|--------------------------------------------|----------|
| Inositol phosphorylceramide synthase (ceramide-3, 26C)                | Golgi apparatus       | cer326 + 0.01 ptdlino -> 0.01 12dgr + 0.01 ipc326         | Sphingolipid Metabolism       | SPAC3H8.06                                 |          |
| mannose-inositol phophorylceramide synthase (ceramide-1, 24C)         | Golgi apparatus       | GDPmann + 0.01 ipc124 -> GDP + H + 0.01 mipc124           | Sphingolipid Metabolism       | SPCC4F11.04c<br>SPAC17G8.11c<br>SPAC2F3.01 |          |
| mannose-inositol phosphorylceramide synthase (ceramide-1, 26C)        | Golgi apparatus       | GDPmann + 0.01 ipc126 -> GDP + H + 0.01 mipc126           | Sphingolipid Metabolism       | SPCC4F11.04c<br>SPAC17G8.11c<br>SPAC2F3.01 |          |
| mannose-inositol phosphorylceramide synthase (ceramide-2, 24C)        | Golgi apparatus       | GDPmann + 0.01 ipc224 -> GDP + H + 0.01 mipc224           | Sphingolipid Metabolism       | SPCC4F11.04c<br>SPAC17G8.11c<br>SPAC2F3.01 |          |
| mannose-inositol phosphorylceramide synthase (ceramide-2, 26C)        | Golgi apparatus       | GDPmann + 0.01 ipc226 -> GDP + H + 0.01 mipc226           | Sphingolipid Metabolism       | SPCC4F11.04c<br>SPAC17G8.11c<br>SPAC2F3.01 |          |
| mannose-inositol phosphorylceramide synthase (ceramide-3, 24C)        | Golgi apparatus       | GDPmann + 0.01 ipc324 -> GDP + H + 0.01 mipc324           | Sphingolipid Metabolism       | SPCC4F11.04c<br>SPAC17G8.11c<br>SPAC2F3.01 |          |
| mannose-inositol phosphorylceramide synthase (ceramide-3, 26C)        | Golgi apparatus       | GDPmann + 0.01 ipc326 -> GDP + H + 0.01 mipc326           | Sphingolipid Metabolism       | SPCC4F11.04c<br>SPAC17G8.11c<br>SPAC2F3.01 |          |
| mannose-inositol phophorylceramide synthase (ceramide-1, 24C)         | Endoplasmic Reticulum | GDPmann + 0.01 ipc124 -> GDP + H + 0.01 mipc124           | Sphingolipid Metabolism       | SPCC4F11.04c<br>SPAC17G8.11c<br>SPAC2F3.01 |          |
| mannose-inositol phosphorylceramide synthase (ceramide-1, 26C)        | Endoplasmic Reticulum | GDPmann + 0.01 ipc126 -> GDP + H + 0.01 mipc126           | Sphingolipid Metabolism       | SPCC4F11.04c<br>SPAC17G8.11c<br>SPAC2F3.01 |          |
| mannose-inositol phosphorylceramide synthase (ceramide-2, 24C)        | Endoplasmic Reticulum | GDPmann + 0.01 ipc224 -> GDP + H + 0.01 mipc224           | Sphingolipid Metabolism       | SPCC4F11.04c<br>SPAC17G8.11c<br>SPAC2F3.01 |          |
| mannose-inositol phosphorylceramide synthase (ceramide-2, 26C)        | Endoplasmic Reticulum | GDPmann + 0.01 ipc226 -> GDP + H + 0.01 mipc226           | Sphingolipid Metabolism       | SPCC4F11.04c<br>SPAC17G8.11c<br>SPAC2F3.01 |          |
| mannose-inositol phosphorylceramide synthase (ceramide-3, 24C)        | Endoplasmic Reticulum | GDPmann + 0.01 ipc324 -> GDP + H + 0.01 mipc324           | Sphingolipid Metabolism       | SPCC4F11.04c<br>SPAC17G8.11c<br>SPAC2F3.01 |          |
| mannose-inositol phosphorylceramide synthase (ceramide-3, 26C)        | Endoplasmic Reticulum | GDPmann + 0.01 ipc326 -> GDP + H + 0.01 mipc326           | Sphingolipid Metabolism       | SPCC4F11.04c<br>SPAC17G8.11c<br>SPAC2F3.01 |          |
| Mannose-inositol phosphorylceramide, ceramide-1 (24C) phospholipase C | Mitochondria          | H2O + 0.01 mipc124 -> cer124 + H + manm1p-D               | Sphingolipid Metabolism       | SPBC32F12.01c                              | 3.1.4.-  |
| Mannose-inositol phosphorylceramide, ceramide-1 (26C) phospholipase C | Mitochondria          | H2O + 0.01 mipc126 -> cer126 + H + manm1p-D               | Sphingolipid Metabolism       | SPBC32F12.01c                              | 3.1.4.-  |
| Mannose-inositol phosphorylceramide, ceramide-2 (24C) phospholipase C | Mitochondria          | H2O + 0.01 mipc224 -> cer224 + H + manm1p-D               | Sphingolipid Metabolism       | SPBC32F12.01c                              | 3.1.4.-  |
| Mannose-inositol phosphorylceramide, ceramide-2 (26C) phospholipase C | Mitochondria          | H2O + 0.01 mipc226 -> cer226 + H + manm1p-D               | Sphingolipid Metabolism       | SPBC32F12.01c                              | 3.1.4.-  |
| Mannose-inositol phosphorylceramide, ceramide-3 (24C) phospholipase C | Mitochondria          | H2O + 0.01 mipc324 -> cer324 + H + manm1p-D               | Sphingolipid Metabolism       | SPBC32F12.01c                              | 3.1.4.-  |
| Mannose-inositol phosphorylceramide, ceramide-3 (26C) phospholipase C | Mitochondria          | H2O + 0.01 mipc326 -> cer326 + H + manm1p-D               | Sphingolipid Metabolism       | SPBC32F12.01c                              | 3.1.4.-  |
| Phytosphingosine synthesis                                            | Endoplasmic Reticulum | H + NADPH + O2 + spHgn -> H2O + NADP + pspHings           | Sphingolipid Metabolism       | SPBC887.15c                                | 1.14.-.- |
| serine C-palmitoyltransferase                                         | Endoplasmic Reticulum | H + C160CoA + SER -> 3dspHgn + CO2 + CoA                  | Sphingolipid Metabolism       | SPAC21E11.08+SPBC18 E5.02c                 | 2.3.1.50 |
| Mannose-inositol phosphorylceramide, ceramide-1 (24C) phospholipase C | Endoplasmic Reticulum | H2O + 0.01 mipc124 -> cer124 + H + manm1p-D               | Sphingolipid Metabolism       | SPBC32F12.01c                              | 3.1.4.-  |
| Mannose-inositol phosphorylceramide, ceramide-1 (26C) phospholipase C | Endoplasmic Reticulum | H2O + 0.01 mipc126 -> cer126 + H + manm1p-D               | Sphingolipid Metabolism       | SPBC32F12.01c                              | 3.1.4.-  |
| Mannose-inositol phosphorylceramide, ceramide-2 (24C) phospholipase C | Endoplasmic Reticulum | H2O + 0.01 mipc224 -> cer224 + H + manm1p-D               | Sphingolipid Metabolism       | SPBC32F12.01c                              | 3.1.4.-  |
| Mannose-inositol phosphorylceramide, ceramide-2 (26C) phospholipase C | Endoplasmic Reticulum | H2O + 0.01 mipc226 -> cer226 + H + manm1p-D               | Sphingolipid Metabolism       | SPBC32F12.01c                              | 3.1.4.-  |
| Mannose-inositol phosphorylceramide, ceramide-3 (24C) phospholipase C | Endoplasmic Reticulum | H2O + 0.01 mipc324 -> cer324 + H + manm1p-D               | Sphingolipid Metabolism       | SPBC32F12.01c                              | 3.1.4.-  |
| Mannose-inositol phosphorylceramide, ceramide-3 (26C) phospholipase C | Endoplasmic Reticulum | H2O + 0.01 mipc326 -> cer326 + H + manm1p-D               | Sphingolipid Metabolism       | SPBC32F12.01c                              | 3.1.4.-  |
| Ceramide-1 hydroxylase (24C)                                          | Cytosol               | cer124 + H + NADPH + O2 -> cer224 + H2O + NADP            | Sphingolipid Metabolism       | SPBC887.15c                                |          |
| Ceramide-1 hydroxylase (26C)                                          | Cytosol               | cer126 + H + NADPH + O2 -> cer226 + H2O + NADP            | Sphingolipid Metabolism       | SPBC887.15c                                |          |
| Ceramide-2' synthase (24C)                                            | Cytosol               | cer124 + H + NADPH + O2 -> cer224 + H2O + NADP            | Sphingolipid Metabolism       | SPAC19G12.08                               |          |
| Ceramide-2' synthase (26C)                                            | Cytosol               | cer126 + H + NADPH + O2 -> cer226 + H2O + NADP            | Sphingolipid Metabolism       | SPAC19G12.08                               |          |
| Ceramide-3 synthase (24C)                                             | Cytosol               | cer224 + H + NADPH + O2 -> cer324 + H2O + NADP            | Sphingolipid Metabolism       | SPAC19G12.08                               |          |
| Ceramide-3 synthase (26C)                                             | Cytosol               | cer226 + H + NADPH + O2 -> cer326 + H2O + NADP            | Sphingolipid Metabolism       | SPAC19G12.08                               |          |
| inositol phosphorylceramide, ceramide-1 (24C) phospholipase C         | Cytosol               | H2O + 0.01 ipc124 -> cer124 + H + mi1p-D                  | Sphingolipid Metabolism       | SPBC32F12.01c                              |          |
| inositol phosphorylceramide, ceramide-1 (26C) phospholipase C         | Cytosol               | H2O + 0.01 ipc126 -> cer126 + H + mi1p-D                  | Sphingolipid Metabolism       | SPBC32F12.01c                              |          |
| inositol phosphorylceramide, ceramide-2 (24C) phospholipase C         | Cytosol               | H2O + 0.01 ipc224 -> cer224 + H + mi1p-D                  | Sphingolipid Metabolism       | SPBC32F12.01c                              |          |
| inositol phosphorylceramide, ceramide-2 (26C) phospholipase C         | Cytosol               | H2O + 0.01 ipc226 -> cer226 + H + mi1p-D                  | Sphingolipid Metabolism       | SPBC32F12.01c                              |          |
| inositol phosphorylceramide, ceramide-3 (24C) phospholipase C         | Cytosol               | H2O + 0.01 ipc324 -> cer324 + H + mi1p-D                  | Sphingolipid Metabolism       | SPBC32F12.01c                              |          |
| inositol phosphorylceramide, ceramide-3 (26C) phospholipase C         | Cytosol               | H2O + 0.01 ipc326 -> cer326 + H + mi1p-D                  | Sphingolipid Metabolism       | SPBC32F12.01c                              |          |
| Mannose-(inositol-P)2-ceramide, ceramide-1 (24C) phospholipase C      | Cytosol               | H2O + 0.01 mip2c124 -> cer124 + H + man2mi1p-D            | Sphingolipid Metabolism       | SPBC32F12.01c                              |          |
| Mannose-(inositol-P)2-ceramide, ceramide-1 (26C) phospholipase C      | Cytosol               | H2O + 0.01 mip2c126 -> cer126 + H + man2mi1p-D            | Sphingolipid Metabolism       | SPBC32F12.01c                              |          |
| Mannose-(inositol-P)2-ceramide, ceramide-2 (24C) phospholipase C      | Cytosol               | H2O + 0.01 mip2c224 -> cer224 + H + man2mi1p-D            | Sphingolipid Metabolism       | SPBC32F12.01c                              |          |
| Mannose-(inositol-P)2-ceramide, ceramide-2 (26C) phospholipase C      | Cytosol               | H2O + 0.01 mip2c226 -> cer226 + H + man2mi1p-D            | Sphingolipid Metabolism       | SPBC32F12.01c                              |          |
| Mannose-(inositol-P)2-ceramide, ceramide-3 (24C) phospholipase C      | Cytosol               | H2O + 0.01 mip2c324 -> cer324 + H + man2mi1p-D            | Sphingolipid Metabolism       | SPBC32F12.01c                              |          |
| Mannose-(inositol-P)2-ceramide, ceramide-3 (26C) phospholipase C      | Cytosol               | H2O + 0.01 mip2c326 -> cer326 + H + man2mi1p-D            | Sphingolipid Metabolism       | SPBC32F12.01c                              |          |
| mannose-(inositol-P)2-ceramide synthase (ceramide-1, 24C)             | Cytosol               | 0.01 mipc124 + 0.01 ptdlino -> 0.01 12dgr + 0.01 mip2c124 | Sphingolipid Metabolism       |                                            |          |
| mannose-(inositol-P)2-ceramide synthase (ceramide-1, 26C)             | Cytosol               | 0.01 mipc126 + 0.01 ptdlino -> 0.01 12dgr + 0.01 mip2c126 | Sphingolipid Metabolism       |                                            |          |
| mannose-(inositol-P)2-ceramide synthase (ceramide-2, 26C)             | Cytosol               | 0.01 mipc224 + 0.01 ptdlino -> 0.01 12dgr + 0.01 mip2c224 | Sphingolipid Metabolism       |                                            |          |
| mannose-(inositol-P)2-ceramide synthase (ceramide-2, 24C)             | Cytosol               | 0.01 mipc226 + 0.01 ptdlino -> 0.01 12dgr + 0.01 mip2c226 | Sphingolipid Metabolism       |                                            |          |
| mannose-(inositol-P)2-ceramide synthase (ceramide-3, 24C)             | Cytosol               | 0.01 mipc324 + 0.01 ptdlino -> 0.01 12dgr + 0.01 mip2c324 | Sphingolipid Metabolism       |                                            |          |
| mannose-(inositol-P)2-ceramide synthase (ceramide-3, 26C)             | Cytosol               | 0.01 mipc326 + 0.01 ptdlino -> 0.01 12dgr + 0.01 mip2c326 | Sphingolipid Metabolism       |                                            |          |
| sphingoid base-phosphate phosphatase (sphinganine 1-phosphate)        | Endoplasmic Reticulum | H2O + spH1p -> Pi + spHgn                                 | Sphingolipid Metabolism       | SPAC823.11                                 | 3.1.3.-  |
| sphingoid base-phosphate phosphatase (phytosphingosine 1-phosphate)   | Endoplasmic Reticulum | H2O + pspH1p -> Pi + pspHings                             | Sphingolipid Metabolism       | SPAC823.11                                 | 3.1.3.-  |
| Exo-1,3-beta-glucan glucohydase                                       | Endoplasmic Reticulum | 13BDGLcN + H2O -> GLC                                     | Starch and Sucrose Metabolism | SPBC1105.05<br>SPAC12B10.11                | 3.2.1.58 |
| Endo-1,3-beta-glucan glucohydase                                      | Cytosol               | 13BDGLcN + H2O -> GLC                                     | Starch and Sucrose Metabolism | SPAC26H5.08c                               | 3.2.1.58 |
| Hydroxymethylglutaryl CoA synthase                                    | Nucleus               | CoA + H + HmgCoA <-> AACoA + ACCoA + H2O                  | Sterol Metabolism             | SPAC4F8.14c                                | 2.3.3.10 |
| mevalonate kinase (CTP)                                               | Nucleus               | CTP + mev-R -> 5pmev + CDP + H                            | Sterol Metabolism             | SPAC13G6.11c                               | 2.7.1.36 |

|                                                              |                       |                                                                                                       |                   |                                            |                        |
|--------------------------------------------------------------|-----------------------|-------------------------------------------------------------------------------------------------------|-------------------|--------------------------------------------|------------------------|
| Hydroxymethylglutaryl CoA reductase                          | Endoplasmic Reticulum | CoA + mev-R + 2 NADP <-> 2 H + HmgCoA + 2 NADPH                                                       | Sterol Metabolism | SPCC162.09c                                | 1.1.1.34               |
| Hydroxymethylglutaryl CoA reductase                          | Nucleus               | CoA + mev-R + 2 NADP <-> 2 H + HmgCoA + 2 NADPH                                                       | Sterol Metabolism | SPCC162.09c                                | 1.1.1.34               |
| Hydroxymethylglutaryl CoA synthase                           | Cytosol               | CoA + H + HmgCoA <-> AACoA + ACCoA + H2O                                                              | Sterol Metabolism | SPAC4F8.14c                                | 2.3.3.10               |
| Hydroxymethylglutaryl CoA synthase                           | Endoplasmic Reticulum | CoA + H + HmgCoA <-> AACoA + ACCoA + H2O                                                              | Sterol Metabolism | SPAC4F8.14c                                | 2.3.3.10               |
| mevalonate kinase (ATP)                                      | Cytosol               | ATP + mev-R -> 5pmev + ADP + H                                                                        | Sterol Metabolism | SPAC13G6.11c                               | 2.7.1.36               |
| mevalonate kinase (ATP)                                      | Nucleus               | ATP + mev-R -> 5pmev + ADP + H                                                                        | Sterol Metabolism | SPAC13G6.11c                               | 2.7.1.36               |
| mevalonate kinase (CTP)                                      | Cytosol               | CTP + mev-R -> 5pmev + CDP + H                                                                        | Sterol Metabolism | SPAC13G6.11c                               | 2.7.1.36               |
| mevalonate kinase (GTP)                                      | Cytosol               | GTP + mev-R -> 5pmev + GDP + H                                                                        | Sterol Metabolism | SPAC13G6.11c                               | 2.7.1.36               |
| mevalonate kinase (GTP)                                      | Nucleus               | GTP + mev-R -> 5pmev + GDP + H                                                                        | Sterol Metabolism | SPAC13G6.11c                               | 2.7.1.36               |
| mevalonate kinase (UTP)                                      | Cytosol               | UTP + mev-R -> 5pmev + UDP + H                                                                        | Sterol Metabolism | SPAC13G6.11c                               | 2.7.1.36               |
| mevalonate kinase (UTP)                                      | Nucleus               | UTP + mev-R -> 5pmev + UDP + H                                                                        | Sterol Metabolism | SPAC13G6.11c                               | 2.7.1.36               |
| phosphomevalonate kinase                                     | Cytosol               | 5pmev + ATP -> 5dpmev + ADP                                                                           | Sterol Metabolism | SPAC343.01c                                | 2.7.4.2                |
| phosphomevalonate kinase                                     | Mitochondria          | 5pmev + ATP -> 5dpmev + ADP                                                                           | Sterol Metabolism | SPAC343.01c                                | 2.7.4.2                |
| phosphomevalonate kinase                                     | Nucleus               | 5pmev + ATP -> 5dpmev + ADP                                                                           | Sterol Metabolism | SPAC343.01c                                | 2.7.4.2                |
| diphosphomevalonate decarboxylase                            | Cytosol               | 5dpmev + ATP -> ADP + CO2 + IPPP + Pi                                                                 | Sterol Metabolism | SPAC24C9.03                                | 4.1.1.33               |
| diphosphomevalonate decarboxylase                            | Nucleus               | 5dpmev + ATP -> ADP + CO2 + IPPP + Pi                                                                 | Sterol Metabolism | SPAC24C9.03                                | 4.1.1.33               |
| isopentenyl-diphosphate D-isomerase                          | Cytosol               | IPPP <-> DMPP                                                                                         | Sterol Metabolism | SPBC106.15                                 | 5.3.3.2                |
| isopentenyl-diphosphate D-isomerase                          | Nucleus               | IPPP <-> DMPP                                                                                         | Sterol Metabolism | SPBC106.15                                 | 5.3.3.2                |
| dimethylallyltransferase                                     | Cytosol               | DMPP + IPPP -> grdp + PPI                                                                             | Sterol Metabolism | SPBC36.06c<br>SPAC6F12.13c                 | 2.5.1.10               |
| dimethylallyltransferase                                     | Nucleus               | DMPP + IPPP -> grdp + PPI                                                                             | Sterol Metabolism | SPBC36.06c<br>SPAC6F12.13c                 | 2.5.1.10               |
| geranyltransferase                                           | Cytosol               | grdp + IPPP -> FRPP + PPI                                                                             | Sterol Metabolism | SPBC36.06c<br>SPAC6F12.13c                 | 2.5.1.10               |
| geranyltransferase                                           | Nucleus               | grdp + IPPP -> FRPP + PPI                                                                             | Sterol Metabolism | SPBC36.06c<br>SPAC6F12.13c                 | 2.5.1.10               |
| Squalene synthase                                            | Endoplasmic Reticulum | 2 FRPP + H + NADPH -> NADP + 2 PPI + SQL                                                              | Sterol Metabolism | SPBC646.05c                                | 2.5.1.21               |
| Squalene epoxidase (NADP)                                    | Endoplasmic Reticulum | FADH2 + O2 + SQL -> SQ23EPX + H2O + FAD                                                               | Sterol Metabolism | SPBC713.12                                 | 1.14.99.7              |
| lanosterol synthase                                          | Cytosol               | SQ23EPX -> lanost                                                                                     | Sterol Metabolism | SPAC13G7.01c                               | 5.4.99.7               |
| lanosterol synthase                                          | Endoplasmic Reticulum | SQ23EPX -> lanost                                                                                     | Sterol Metabolism | SPAC13G7.01c                               | 5.4.99.7               |
| Acyl-CoA:lanosterol acyltransferase                          | Endoplasmic Reticulum | 0.655 C161CoA + 0.015 C140CoA -> CoA + 0.01 lanostest                                                 | Sterol Metabolism | SPAC13G7.05<br>SPCPIE1.05                  | 2.3.1.26               |
| lanosterol ester hydrolase                                   | Cytosol               | H2O + 0.01 lanostest -> H + 0.02 C160 + 0.655 C161 + 0.01 lanost + 0.03 C180 + 0.27 C181 + 0.015 C140 | Sterol Metabolism | SPCC1672.09<br>SPBC14C8.15<br>SPBC16A3.12c |                        |
| lanosterol ester hydrolase (extracellular)                   | Extracellular         | H2O + 0.01 lanostest -> H + 0.02 C160 + 0.655 C161 + 0.01 lanost + 0.03 C180 + 0.27 C181 + 0.015 C140 | Sterol Metabolism |                                            |                        |
| lanosterol ester hydrolase                                   | Golgi apparatus       | H2O + 0.01 lanostest -> H + 0.02 C160 + 0.655 C161 + 0.01 lanost + 0.03 C180 + 0.27 C181 + 0.015 C140 | Sterol Metabolism | SPCC1672.09<br>SPBC14C8.15<br>SPBC16A3.12c |                        |
| cytochrome P450 lanosterol 14-alpha-demethylase (NADP)       | Endoplasmic Reticulum | 3 H + lanost + 3 NADPH + 3 O2 -> 44mctr + FORM + 4 H2O + 3 NADP                                       | Sterol Metabolism | SPAC13A11.02c                              | 1.14.13.70,<br>1.6.2.4 |
| C-14 sterol reductase                                        | Endoplasmic Reticulum | 44mctr + H + NADPH -> 44mzym + NADP                                                                   | Sterol Metabolism | SPBC16G5.18                                | 1.3.1.70               |
| C-4 sterol methyl oxidase (4,4-dimethylzymosterol)           | Endoplasmic Reticulum | 44mzym + 3 H + 3 NADPH + 3 O2 -> 44mzymc + 4 H2O + 3 NADP                                             | Sterol Metabolism | SPAC630.08c                                | 1.14.13.72             |
| C-3 sterol dehydrogenase (4-methylzymosterol)                | Endoplasmic Reticulum | 44mzymc + NAD -> 3k4mzym + CO2 + H + NADH                                                             | Sterol Metabolism | SPBC3F6.02c                                | 1.1.1.170              |
| C-3 sterol dehydrogenase (4-methylzymosterol),golgi          | Golgi apparatus       | 44mzymc + NAD -> 3k4mzym + CO2 + H + NADH                                                             | Sterol Metabolism | SPBC3F6.02c                                | 1.1.1.170              |
| C-3 sterol keto reductase (4-methylzymosterol)               | Endoplasmic Reticulum | 3k4mzym + H + NADPH -> 4mzym + NADP                                                                   | Sterol Metabolism | SPBC1709.07                                | 1.1.1.270              |
| C-4 sterol methyl oxidase (4-methylzymosterol)               | Endoplasmic Reticulum | 4mzym + 3 H + 3 NADPH + 3 O2 -> zym_int1 + 4 H2O + 3 NADP                                             | Sterol Metabolism | SPAC630.08c                                | 1.14.13.72             |
| C-3 sterol dehydrogenase (zymosterol), endoplasmic reticulum | Endoplasmic Reticulum | NAD + zym_int1 -> CO2 + H + NADH + zym_int2                                                           | Sterol Metabolism | SPBC3F6.02c                                | 1.1.1.170              |
| C-3 sterol dehydrogenase (zymosterol)                        | Golgi apparatus       | NAD + zym_int1 -> CO2 + H + NADH + zym_int2                                                           | Sterol Metabolism | SPBC3F6.02c                                | 1.1.1.170              |
| C-3 sterol keto reductase (zymosterol)                       | Endoplasmic Reticulum | H + NADPH + zym_int2 -> NADP + zymst                                                                  | Sterol Metabolism | SPBC1709.07                                | 1.1.1.270              |
| Acyl-CoA:zymosterol acyltransferase                          | Endoplasmic Reticulum | 0.655 C161CoA + 0.015 C140CoA -> CoA + 0.01 zymstest                                                  | Sterol Metabolism | SPAC13G7.05<br>SPCPIE1.05                  | 2.3.1.26               |
| zymosterol ester hydrolase                                   | Cytosol               | H2O + 0.01 zymstest -> H + 0.02 C160 + 0.655 C161 + 0.03 C180 + 0.27 C181 + 0.015 C140 + 0.01 zymst   | Sterol Metabolism | SPCC1672.09<br>SPBC14C8.15<br>SPBC16A3.12c |                        |
| zymosterol ester hydrolase (extracellular)                   | Extracellular         | H2O + 0.01 zymstest -> H + 0.02 C160 + 0.655 C161 + 0.03 C180 + 0.27 C181 + 0.015 C140 + 0.01 zymst   | Sterol Metabolism |                                            |                        |
| S-adenosyl-methionine delta-24-sterol-c-methyltransferase    | Endoplasmic Reticulum | SAM + zymst -> SAH + fecost + H                                                                       | Sterol Metabolism | SPBC16E9.05                                | 2.1.1.41               |
| S-adenosyl-methionine delta-24-sterol-c-methyltransferase    | Nucleus               | SAM + zymst -> SAH + fecost + H                                                                       | Sterol Metabolism | SPBC16E9.05                                | 2.1.1.41               |
| Acyl-CoA:fecosterol acyltransferase                          | Endoplasmic Reticulum | 0.01 fecost + 0.655 C161CoA + 0.015 C140CoA -> CoA + 0.01 fecostest                                   | Sterol Metabolism | SPAC13G7.05<br>SPCPIE1.05                  | 2.3.1.26               |
| fecosterol ester hydrolase                                   | Cytosol               | 0.01 fecostest + H2O -> 0.01 fecost + H + 0.02 C160 + 0.655 C161 + 0.03 C180 + 0.27 C181 + 0.015 C140 | Sterol Metabolism | SPCC1672.09<br>SPBC14C8.15<br>SPBC16A3.12c |                        |
| fecosterol ester hydrolase (extracellular)                   | Extracellular         | 0.01 fecostest + H2O -> 0.01 fecost + H + 0.02 C160 + 0.655 C161 + 0.03 C180 + 0.27 C181 + 0.015 C140 | Sterol Metabolism |                                            |                        |
| fecosterol ester hydrolase                                   | Golgi apparatus       | 0.01 fecostest + H2O -> 0.01 fecost + H + 0.02 C160 + 0.655 C161 + 0.03 C180 + 0.27 C181 + 0.015 C140 | Sterol Metabolism | SPCC1672.09<br>SPBC14C8.15<br>SPBC16A3.12c |                        |
| C-8 sterol isomerase                                         | Endoplasmic Reticulum | fecost -> ePist                                                                                       | Sterol Metabolism | SPAC20G8.07c                               |                        |
| Acyl-CoA:ePisterol acyltransferase                           | Cytosol               | 0.01 ePist + 0.655 C161CoA + 0.015 C140CoA -> CoA + 0.01 ePistest                                     | Sterol Metabolism | SPAC13G7.05<br>SPCPIE1.05                  | 2.3.1.26               |
| ePisterol ester hydrolase                                    | Cytosol               | 0.01 ePistest + H2O -> 0.01 ePist + H + 0.02 C160 + 0.655 C161 + 0.03 C180 + 0.27 C181 + 0.015 C140   | Sterol Metabolism | SPCC1672.09<br>SPBC14C8.15<br>SPBC16A3.12c |                        |
| ePisterol ester hydrolase (extracellular)                    | Extracellular         | 0.01 ePistest + H2O -> 0.01 ePist + H + 0.02 C160 + 0.655 C161 + 0.03 C180 + 0.27 C181 + 0.015 C140   | Sterol Metabolism |                                            |                        |
| ePisterol ester hydrolase                                    | Golgi apparatus       | 0.01 ePistest + H2O -> 0.01 ePist + H + 0.02 C160 + 0.655 C161 + 0.03 C180 + 0.27 C181 + 0.015 C140   | Sterol Metabolism | SPCC1672.09<br>SPBC14C8.15<br>SPBC16A3.12c |                        |
| cholestenol delta-isomerase, lumped reaction                 | Cytosol               | SAM + O2 + zymst -> SAH + ergtetrol + H + 2 H2O                                                       | Sterol Metabolism |                                            |                        |
| C-s24 sterol reductase                                       | Endoplasmic Reticulum | ergtetrol + H + NADPH -> ergst + NADP                                                                 | Sterol Metabolism | SPAC20G4.07c                               | 1.3.1.71               |
| Acyl-CoA:ergosterol acyltransferase                          | Endoplasmic Reticulum | 0.01 ergst + 0.655 C161CoA + 0.015 C140CoA -> CoA + 0.01 ergstest                                     | Sterol Metabolism | SPAC13G7.05<br>SPCPIE1.05                  | 2.3.1.26               |
| ergosterol ester hydrolase                                   | Cytosol               | 0.01 ergstest + H2O -> 0.01 ergst + H + 0.02 C160 + 0.655 C161 + 0.03 C180 + 0.27 C181 + 0.015 C140   | Sterol Metabolism | SPCC1672.09<br>SPBC14C8.15<br>SPBC16A3.12c |                        |
| ergosterol ester hydrolase (extracellular)                   | Extracellular         | 0.01 ergstest + H2O -> 0.01 ergst + H + 0.02 C160 + 0.655 C161 + 0.03 C180 + 0.27 C181 + 0.015 C140   | Sterol Metabolism |                                            |                        |



|                                                                               |                       |                                                                                                     |                                  |                                            |          |
|-------------------------------------------------------------------------------|-----------------------|-----------------------------------------------------------------------------------------------------|----------------------------------|--------------------------------------------|----------|
| ergosterol ester hydrolase aparatus                                           | Golgi apparatus       | 0.01 ergstest + H2O -> 0.01 ergst + H + 0.02 C160 + 0.655 C161 + 0.03 C180 + 0.27 C181 + 0.015 C140 | Sterol Metabolism                | SPCC1672.09<br>SPBC14C8.15<br>SPBC16A3.12c |          |
| UDP-glucose:ergosterol glucosyltransferase                                    | Cytosol               | ergst + UDPg -> ergst3GLC + H + UDP                                                                 | Sterol Metabolism                |                                            |          |
| Sucrose 6-phosphate fructohydrolase                                           | Extracellular         | sucr6p + H2O -> fru + G6P                                                                           | Sucrose and Starch Metabolism    | SPCC191.11                                 | 3.2.1.26 |
| Sucrose 6-phosphate fructohydrolase                                           | Cytosol               | sucr6p + H2O -> fru + G6P                                                                           | Sucrose and Starch Metabolism    | SPAC8E11.01c                               | 3.2.1.26 |
| TaURNe dioxygenase                                                            | Cytosol               | AKG + O2 + taur -> aacald + CO2 + H + SO3 + SUCC                                                    | Taurine Metabolism               |                                            |          |
| thiamin phosphatase                                                           | Endoplasmic Reticulum | H2O + THMMP -> Pi + THM                                                                             | Thiamine Metabolism              | SPBP4G3.02<br>SPBC428.03c<br>SPBC21H7.03c  | 3.1.3.2  |
| thiamin phosphatase                                                           | Golgi apparatus       | H2O + THMMP -> Pi + THM                                                                             | Thiamine Metabolism              | SPBC428.03c                                | 3.1.3.2  |
| 4-amino-5-hydroxymethyl-2-methylpyrimidine synthetase                         | Cytosol               | air + 2 H -> 4AHMMP + gcaald + Pi                                                                   | Thiamine Metabolism              |                                            |          |
| hydroxyethylthiazole kinase                                                   | Cytosol               | 4mHetz + ATP -> 4mpetz + ADP + H                                                                    | Thiamine Metabolism              | SPAC23H4.10c                               | 2.7.1.50 |
| thiamin diphosphatase                                                         | Extracellular         | 2 H2O + THMPP -> H + 2 Pi + THM                                                                     | Thiamine Metabolism              | SPBP4G3.02<br>SPBC428.03c<br>SPBC21H7.03c  | 3.1.3.2  |
| thiamin phosphatase                                                           | Extracellular         | H2O + THMMP -> Pi + THM                                                                             | Thiamine Metabolism              | SPBP4G3.02<br>SPBC428.03c<br>SPBC21H7.03c  | 3.1.3.2  |
| thiazole phosphate synthesis (xylulose 5-phosphate)                           | Cytosol               | ACHMS + CYS + GLY + H + xu5p-D -> 4abut + 4mpetz + AC + CO2 + 3 H2O + NH4 + PYR                     | Thiamine Metabolism              |                                            |          |
| thiazole phosphate synthesis (ribose 5-phosphate)                             | Cytosol               | ACHMS + CYS + GLY + H + RSP -> 4abut + 4mpetz + AC + CO2 + 3 H2O + NH4 + PYR                        | Thiamine Metabolism              |                                            |          |
| thiamine diphosphokinase                                                      | Cytosol               | ATP + THM -> AMP + H + THMPP                                                                        | Thiamine Metabolism              | SPAC6F12.05c                               | 2.7.6.2  |
| thiamine-diphosphate kinase                                                   | Cytosol               | ATP + THMPP -> ADP + THMTP                                                                          | Thiamine Metabolism              | SPAC6F12.05c                               | 2.7.6.2  |
| thiaminase                                                                    | Cytosol               | H2O + THM -> 4AHMMP + 4mHetz + H                                                                    | Thiamine Metabolism              |                                            |          |
| thiamine-phosphate kinase                                                     | Cytosol               | ATP + THMMP <-> ADP + THMPP                                                                         | Thiamine Metabolism              |                                            |          |
| thiamine-phosphate diphosphorylase                                            | Cytosol               | 2maHmp + 4mpetz + H -> PPI + THMMP                                                                  | Thiamine Metabolism              | SPAC23H4.10c                               | 2.7.1.50 |
| homoisocitrate dehydrogenase                                                  | Cytosol               | HICIT + NAD <-> H + NADH + oxag                                                                     | Threonine and Lysine Metabolism  | SPAC31G5.04                                | 1.1.1.87 |
| L-allo-Threonine Aldolase                                                     | Nucleus               | aTHR -> ACAL + GLY                                                                                  | Threonine and Lysine Metabolism  | SPAC23H3.09c                               | 4.1.2.5  |
| threonine synthase                                                            | Nucleus               | H2O + PHOM -> Pi + THR                                                                              | Threonine and Lysine Metabolism  | SPAC9E9.06c                                | 4.2.3.1  |
| 4-Hydroxy-L-threonine synthase                                                | Nucleus               | H2O + PHTHR -> 4HtHr + Pi                                                                           | Threonine and Lysine Metabolism  | SPAC9E9.06c                                | 4.2.3.1  |
| Threonine aldolase                                                            | Nucleus               | THR -> ACAL + GLY                                                                                   | Threonine and Lysine Metabolism  | SPAC23H3.09c                               | 4.1.2.5  |
| 4-Hydroxy-L-threonine synthase                                                | Cytosol               | H2O + PHTHR -> 4HtHr + Pi                                                                           | Threonine and Lysine Metabolism  | SPAC9E9.06c                                | 4.2.3.1  |
| L-aminoadipate-semialdehyde dehydrogenase (NADPH)                             | Cytosol               | L2aADP + ATP + H + NADPH -> L2aADP6SA + AMP + NADP + PPI                                            | Threonine and Lysine Metabolism  | SPAP7G5.04c                                | 1.2.1.31 |
| L-aminoadipate-semialdehyde dehydrogenase (NADH)                              | Cytosol               | L2aADP + ATP + H + NADH -> L2aADP6SA + AMP + NAD + PPI                                              | Threonine and Lysine Metabolism  | SPAP7G5.04c                                | 1.2.1.31 |
| 2-aminoadipate transaminase                                                   | Cytosol               | 2oxoADP + GLU <-> L2aADP + AKG                                                                      | Threonine and Lysine Metabolism  |                                            |          |
| L-2-amino-3-oxobutanoate decarboxylation                                      | Cytosol               | 2aobut + H -> aact + CO2                                                                            | Threonine and Lysine Metabolism  |                                            |          |
| L-allo-threonine dehydrogenase                                                | Cytosol               | aTHR + NADP <-> 2aobut + H + NADPH                                                                  | Threonine and Lysine Metabolism  | SPAC521.03                                 |          |
| glycine C-acetyltransferase                                                   | Cytosol               | 2aobut + CoA -> ACCoA + GLY                                                                         | Threonine and Lysine Metabolism  |                                            | 2.3.1.29 |
| homoaccontinate hydratase                                                     | Mitochondria          | b124tc + H2O <-> HICIT                                                                              | Threonine and Lysine Metabolism  | SPAC343.16                                 | 4.2.1.36 |
| homoisocitrate dehydrogenase                                                  | Mitochondria          | HICIT + NAD <-> H + NADH + oxag                                                                     | Threonine and Lysine Metabolism  | SPAC31G5.04                                | 1.1.1.87 |
| 2-methylcitrate dehydratase                                                   | Mitochondria          | HCIT <-> b124tc + H2O                                                                               | Threonine and Lysine Metabolism  |                                            |          |
| 2-Oxobutanoate dehydrogenase                                                  | Mitochondria          | 2obut + CoA + NAD -> CO2 + NADH + ppCoA                                                             | Threonine and Lysine Metabolism  |                                            | 1.2.7.2  |
| non-enzymatic reaction                                                        | Mitochondria          | H + oxag <-> 2oxoADP + CO2                                                                          | Threonine and Lysine Metabolism  |                                            |          |
| saccharoPine dehydrogenase (NADP, L-glutamate forming)                        | Cytosol               | L2aADP6SA + GLU + H + NADPH <-> H2O + NADP + SAacrp-L                                               | Threonine and Lysine Metabolism  | SPBC3B8.03                                 | 1.5.1.10 |
| saccharoPine dehydrogenase (NAD, L-lysine forming)                            | Cytosol               | H2O + NAD + SAacrp-L <-> AKG + H + LYS + NADH                                                       | Threonine and Lysine Metabolism  | SPAC227.18                                 | 1.5.1.7  |
| L-allo-Threonine Aldolase                                                     | Cytosol               | aTHR -> ACAL + GLY                                                                                  | Threonine and Lysine Metabolism  | SPAC23H3.09c                               | 4.1.2.5  |
| Threonine aldolase                                                            | Cytosol               | THR -> ACAL + GLY                                                                                   | Threonine and Lysine Metabolism  | SPAC23H3.09c                               | 4.1.2.5  |
| L-threonine deaminase                                                         | Cytosol               | THR -> 2obut + NH4                                                                                  | Threonine and Lysine Metabolism  | SPCC320.14<br>SPBC1677.03c                 | 4.3.1.19 |
| L-threonine deaminase                                                         | Mitochondria          | THR -> 2obut + NH4                                                                                  | Threonine and Lysine Metabolism  | SPBC1677.03c                               | 4.3.1.19 |
| threonine synthase                                                            | Cytosol               | H2O + PHOM -> Pi + THR                                                                              | Threonine and Lysine Metabolism  | SPAC9E9.06c                                | 4.2.3.1  |
| 6-phospho-D-glucono-1,5-lactone endoplasmic reticular transport via diffusion |                       | 6pgl[c] <-> 6pgl[r]                                                                                 | Transport, Endoplasmic Reticulum |                                            |          |
| ceramide-1 (C24) endoplasmic reticular transport                              | Membrane              | cer124[c] <-> cer124[r]                                                                             | Transport, Endoplasmic Reticulum |                                            |          |
| ceramide-1 (C26) endoplasmic reticular transport                              | Membrane              | cer126[c] <-> cer126[r]                                                                             | Transport, Endoplasmic Reticulum |                                            |          |
| ceramide-2 (C24) endoplasmic reticular transport                              | Membrane              | cer224[c] <-> cer224[r]                                                                             | Transport, Endoplasmic Reticulum |                                            |          |
| ceramide-2 (C26) endoplasmic reticular transport                              | Membrane              | cer226[c] <-> cer226[r]                                                                             | Transport, Endoplasmic Reticulum |                                            |          |
| dolichol phosphate endoplasmic reticular transport via proton symport         | Membrane              | dolp[c] + H[c] <-> dolp[r] + H[r]                                                                   | Transport, Endoplasmic Reticulum |                                            |          |
| ergosterol endoplasmic reticular transport                                    | Membrane              | ergst[r] <-> ergst[c]                                                                               | Transport, Endoplasmic Reticulum |                                            |          |
| Ergosta-5,6,22,24,(28)-tetraen-3beta-ol endoplasmic reticular transport       | Membrane              | ergtetrol[c] <-> ergtetrol[r]                                                                       | Transport, Endoplasmic Reticulum |                                            |          |
| glucose 6-phosphate endoplasmic reticular transport via diffusion             | Membrane              | G6P[c] <-> G6P[r]                                                                                   | Transport, Endoplasmic Reticulum |                                            |          |
| H2O endoplasmic reticulum transport                                           | Membrane              | H2O[c] <-> H2O[r]                                                                                   | Transport, Endoplasmic Reticulum |                                            |          |
| mannan endoplasmic reticulum transport via diffusion                          | Membrane              | mannan[c] <-> mannan[r]                                                                             | Transport, Endoplasmic Reticulum |                                            |          |
| O2 transport                                                                  | Membrane              | O2[c] <-> O2[r]                                                                                     | Transport, Endoplasmic Reticulum |                                            |          |
| phytylphosphatidyl 1-phosphate endoplasmic reticular transport                | Membrane              | pspH1p[c] -> pspH1p[r]                                                                              | Transport, Endoplasmic Reticulum |                                            |          |
| sphinganine 1-phosphate endoplasmic reticular transport                       | Membrane              | spH1p[c] -> spH1p[r]                                                                                | Transport, Endoplasmic Reticulum |                                            |          |
| Squalene-2,3-epoxide endoplasmic reticular transport                          | Membrane              | SQ23EPX[r] <-> SQ23EPX[c]                                                                           | Transport, Endoplasmic Reticulum |                                            |          |
| squalene endoplasmic reticular transport                                      | Membrane              | SQL[c] <-> SQL[r]                                                                                   | Transport, Endoplasmic Reticulum |                                            |          |
| Diphosphate endoplasmic reticulum transport                                   | Membrane              | PPi[c] <-> PPi[r]                                                                                   | Transport, Endoplasmic Reticulum |                                            |          |
| FAD endoplasmic reticulum transport                                           | Membrane              | FAD[m] <-> FAD[r]                                                                                   | Transport, Endoplasmic Reticulum |                                            |          |
| Proton endoplasmic reticulum transport                                        | Membrane              | h[c] <-> h[r]                                                                                       | Transport, Endoplasmic Reticulum |                                            |          |
| Formate endoplasmic reticulum transport                                       | Membrane              | FORM[c] <-> FORM[r]                                                                                 | Transport, Endoplasmic Reticulum |                                            |          |
| FADH2 endoplasmic reticulum transport                                         | Membrane              | FADH2[m] <-> FADH2[r]                                                                               | Transport, Endoplasmic Reticulum |                                            |          |
| NADH endoplasmic reticulum transport                                          | Membrane              | NADH[c] <-> NADH[r]                                                                                 | Transport, Endoplasmic Reticulum |                                            |          |
| NAD endoplasmic reticulum transport                                           | Membrane              | NAD[c] <-> NAD[r]                                                                                   | Transport, Endoplasmic Reticulum |                                            |          |
| CO2 endoplasmic reticulum transport                                           | Membrane              | CO2[c] <-> CO2[r]                                                                                   | Transport, Endoplasmic Reticulum |                                            |          |
| SAH endoplasmic reticulum transport                                           | Membrane              | SAH[c] <-> SAH[r]                                                                                   | Transport, Endoplasmic Reticulum |                                            |          |
| 3mop reversible trasport                                                      | Membrane              | 3MOP[e] <-> 3MOP[c]                                                                                 | Transport, Extracellular         |                                            |          |
| acetaldehyde reversible transport                                             | Membrane              | ACAL[e] <-> ACAL[c]                                                                                 | Transport, Extracellular         |                                            |          |
| acetate reversible transport via proton symport                               | Membrane              | ac[e] + H[e] <-> ac[c] + H[c]                                                                       | Transport, Extracellular         |                                            |          |
| acetate transporter                                                           | Membrane              | ac[e] <-> ac[c]                                                                                     | Transport, Extracellular         |                                            |          |
| adenine transport in via proton symport                                       | Membrane              | ADE[e] + H[e] -> ADE[c] + H[c]                                                                      | Transport, Extracellular         |                                            |          |
| adenosine transport in via proton symport                                     | Membrane              | ADN[e] + H[e] -> ADN[c] + H[c]                                                                      | Transport, Extracellular         |                                            |          |
| alpha-ketoglutarate/malate transporter                                        | Membrane              | AKG[c] + MAL[e] <-> AKG[e] + MAL[c]                                                                 | Transport, Extracellular         |                                            |          |
| 2-oxoglutarate reversible transport via symport                               | Membrane              | AKG[e] + H[e] <-> AKG[c] + H[c]                                                                     | Transport, Extracellular         |                                            |          |

|                                                         |          |                                          |                          |                                                                                                      |
|---------------------------------------------------------|----------|------------------------------------------|--------------------------|------------------------------------------------------------------------------------------------------|
| L-alanine reversible transport via proton symport       | Membrane | ALA[e] + H[e] <> ALA[c] + H[c]           | Transport, Extracellular |                                                                                                      |
| allantoin uniport                                       | Membrane | alltn[e] -> alltn[c]                     | Transport, Extracellular |                                                                                                      |
| allantoate uniport                                      | Membrane | alltt[e] -> alltt[c]                     | Transport, Extracellular |                                                                                                      |
| D-arabinose reversible transport                        | Membrane | arab-D[e] <> arab-D[c]                   | Transport, Extracellular |                                                                                                      |
| L-arabinose extracellular transport                     | Membrane | arab-L[e] <> arab-L[c]                   | Transport, Extracellular |                                                                                                      |
| L-arginine reversible transport via proton symport      | Membrane | ARG[e] + H[e] <> ARG[c] + H[c]           | Transport, Extracellular |                                                                                                      |
| L-asparagine reversible transport via proton symport    | Membrane | ASN[e] + H[e] <> ASN[c] + H[c]           | Transport, Extracellular |                                                                                                      |
| L-aspartate reversible transport via proton symport     | Membrane | ASP[e] + H[e] <> ASP[c] + H[c]           | Transport, Extracellular |                                                                                                      |
| ATPaseic                                                | Membrane | ATP[c] + H2O[c] -> ADP[c] + H[e] + Pi[c] | Transport, Extracellular |                                                                                                      |
| Biotin uptake                                           | Membrane | btm[e] + H[e] -> btm[c] + H[c]           | Transport, Extracellular |                                                                                                      |
| choline transport via proton symport                    | Membrane | CHOL[e] + H[e] -> CHOL[c] + H[c]         | Transport, Extracellular |                                                                                                      |
| citrate reversible transport via symport                | Membrane | CIT[e] + H[e] <> CIT[c] + H[c]           | Transport, Extracellular |                                                                                                      |
| CO2 transporter via diffusion                           | Membrane | CO2[e] <> CO2[c]                         | Transport, Extracellular |                                                                                                      |
| cytosine transport in via proton symport                | Membrane | csn[e] + H[e] -> csnc[c] + H[c]          | Transport, Extracellular |                                                                                                      |
| L-cysteine reversible transport via proton symport      | Membrane | CYS[e] + H[e] <> CYS[c] + H[c]           | Transport, Extracellular |                                                                                                      |
| cytidine transport in via proton symport                | Membrane | cytd[e] + H[e] -> cytd[c] + H[c]         | Transport, Extracellular |                                                                                                      |
| D-lactate transport via proton symport                  | Membrane | H[e] + dLAC[e] <> H[c] + dLAC[c]         | Transport, Extracellular |                                                                                                      |
| deoxyadenosine transport in via proton symport          | Membrane | dad-2[e] + H[e] -> dad-2[c] + H[c]       | Transport, Extracellular |                                                                                                      |
| deoxycytidine transport in via proton symport           | Membrane | dcty[e] + H[e] -> dcty[c] + H[c]         | Transport, Extracellular |                                                                                                      |
| deoxyguanosine transport in via proton symport          | Membrane | dGSN[e] + H[e] -> dGSN[c] + H[c]         | Transport, Extracellular |                                                                                                      |
| deoxyinosine transport in via proton symport            | Membrane | din[e] + H[e] -> din[c] + H[c]           | Transport, Extracellular |                                                                                                      |
| dTTP reversible uniport                                 | Membrane | dTTP[e] <> dTTP[c]                       | Transport, Extracellular |                                                                                                      |
| deoxyURIdine transport in via proton symport            | Membrane | dURI[e] + H[e] -> dURI[c] + H[c]         | Transport, Extracellular |                                                                                                      |
| ethanol reversible transport                            | Membrane | ETOH[e] <> ETOH[c]                       | Transport, Extracellular |                                                                                                      |
| iron (II) transport                                     | Membrane | fe2[e] -> fe2[c]                         | Transport, Extracellular |                                                                                                      |
| formate transport via diffusion                         | Membrane | for[e] <> for[c]                         | Transport, Extracellular |                                                                                                      |
| D-fructose transport in via proton symport              | Membrane | fru[e] + H[e] -> fru[c] + H[c]           | Transport, Extracellular |                                                                                                      |
| D-galactose transport in via proton symport             | Membrane | gal[e] + H[e] -> gal[c] + H[c]           | Transport, Extracellular |                                                                                                      |
| Glycoaldehyde reversible transport                      | Membrane | gcald[e] <> gcald[c]                     | Transport, Extracellular |                                                                                                      |
| glucose transport (uniport)                             | Membrane | GLC[e] -> GLC[c]                         | Transport, Extracellular | SPCC548.07C<br>SPAC1F8.01<br>SPBC4B4.08<br>SPBC1683.08<br>SPCC1235.13<br>SPCC1235.14<br>SPCC548.06c  |
| L-glutamine reversible transport via proton symport     | Membrane | GLN[e] + H[e] <> GLN[c] + H[c]           | Transport, Extracellular |                                                                                                      |
| L-glutamate transport via proton symport                | Membrane | GLU[e] + H[e] <> GLU[c] + H[c]           | Transport, Extracellular |                                                                                                      |
| glyoxylate transport                                    | Membrane | GLX[e] <> GLX[c]                         | Transport, Extracellular |                                                                                                      |
| glycerol transport via channel                          | Membrane | GLYC[e] <> GLYC[c]                       | Transport, Extracellular |                                                                                                      |
| glycerol transport via symport                          | Membrane | GLYC[e] + H[e] -> GLYC[c] + H[c]         | Transport, Extracellular |                                                                                                      |
| glycine reversible transport via proton symport         | Membrane | GLY[e] + H[e] <> GLY[c] + H[c]           | Transport, Extracellular |                                                                                                      |
| guanosine transport in via proton symport               | Membrane | GSN[e] + H[e] -> GSN[c] + H[c]           | Transport, Extracellular |                                                                                                      |
| oxidized glutathione uniport                            | Membrane | GTHox[e] -> GTHox[c]                     | Transport, Extracellular |                                                                                                      |
| glutathione transport                                   | Membrane | GTHrd[e] -> GTHrd[c]                     | Transport, Extracellular |                                                                                                      |
| guanine reversible transport via proton symport         | Membrane | GUA[e] + H[e] <> GUA[c] + H[c]           | Transport, Extracellular |                                                                                                      |
| H2O transport via diffusion                             | Membrane | H2O[e] <> H2O[c]                         | Transport, Extracellular |                                                                                                      |
| Hexadecanoate (n-C16:0) transport in via uniport        | Membrane | C160[e] -> C160[c]                       | Transport, Extracellular |                                                                                                      |
| hexadecenoate (n-C16:1) transport in via uniport        | Membrane | C161[e] -> C161[c]                       | Transport, Extracellular |                                                                                                      |
| L-histidine reversible transport via proton symport     | Membrane | H[e] + HIS[e] <> H[c] + HIS[c]           | Transport, Extracellular |                                                                                                      |
| hypoxanthine reversible transport via proton symport    | Membrane | H[e] + HXAN[e] <> H[c] + HXAN[c]         | Transport, Extracellular |                                                                                                      |
| L-isoleucine reversible transport via proton symport    | Membrane | H[e] + ILE[e] <> H[c] + ILE[c]           | Transport, Extracellular |                                                                                                      |
| Tryptophol transport (extracellular)                    | Membrane | ind3etH[e] <> ind3etH[c]                 | Transport, Extracellular |                                                                                                      |
| potassium reversible transport via proton symport       | Membrane | H[e] + k[e] <> H[c] + k[c]               | Transport, Extracellular | SPAC105.01C                                                                                          |
| L-lactate reversible transport via proton symport       | Membrane | H[e] + LAC[e] <> H[c] + LAC[c]           | Transport, Extracellular |                                                                                                      |
| L-leucine reversible transport via proton symport       | Membrane | H[e] + LEU[e] <> H[c] + LEU[c]           | Transport, Extracellular |                                                                                                      |
| L-lysine reversible transport via proton symport        | Membrane | H[e] + LYS[e] <> H[c] + LYS[c]           | Transport, Extracellular |                                                                                                      |
| L-malate reversible transport via proton symport        | Membrane | H[e] + MAL[e] <> H[c] + MAL[c]           | Transport, Extracellular |                                                                                                      |
| maltose transport in via proton symport                 | Membrane | H[e] + MALT[e] -> H[c] + MALT[c]         | Transport, Extracellular |                                                                                                      |
| D-mannose transport in via proton symport               | Membrane | H[e] + man[e] -> H[c] + man[c]           | Transport, Extracellular |                                                                                                      |
| L-methionine reversible transport via proton symport    | Membrane | H[e] + MET[e] <> H[c] + MET[c]           | Transport, Extracellular |                                                                                                      |
| Nicotinic acid transport                                | Membrane | nac[e] <> nac[c]                         | Transport, Extracellular |                                                                                                      |
| NADP transporter                                        | Membrane | NADP[c] <> NADP[e]                       | Transport, Extracellular |                                                                                                      |
| sodium proton antiporter (H:NA is 1:1)                  | Membrane | H[e] + na1[c] <> H[c] + na1[e]           | Transport, Extracellular | SPAC977.10<br>SPAC15A10.06<br>SPAC3A11.09                                                            |
| N,N-bisformyl-dityrosine transport (extracellular)      | Membrane | Nbfortyr[c] -> Nbfortyr[e]               | Transport, Extracellular |                                                                                                      |
| ammonia reversible transport                            | Membrane | NH4[e] <> NH4[c]                         | Transport, Extracellular | SPCPB1C11.01<br>SPAC664.14<br>SPAC2E1P3.02c                                                          |
| nmntp                                                   | Membrane | H[e] + nmn[e] -> H[c] + nmn[c]           | Transport, Extracellular |                                                                                                      |
| o2 transport (diffusion)                                | Membrane | O2[e] <> O2[c]                           | Transport, Extracellular |                                                                                                      |
| Oxaloacetate transport                                  | Membrane | OAA[c] <> OAA[e]                         | Transport, Extracellular |                                                                                                      |
| C080decanoate (n-C18:0) transport in via uniport        | Membrane | C180[e] -> C180[c]                       | Transport, Extracellular |                                                                                                      |
| C080decenoate (n-C18:1) transport in via uniport        | Membrane | C181[e] -> C181[c]                       | Transport, Extracellular |                                                                                                      |
| C080decynoate (n-C18:2) transport in via uniport        | Membrane | C182[e] -> C182[c]                       | Transport, Extracellular |                                                                                                      |
| ornithine reversible transport in via proton symport    | Membrane | H[e] + ORN[e] <> H[c] + ORN[c]           | Transport, Extracellular |                                                                                                      |
| Phenylacetaldehyde transport (extracellular)            | Membrane | PACALD[c] <> PACALD[e]                   | Transport, Extracellular |                                                                                                      |
| PAP reversible uniport                                  | Membrane | PAP[e] <> PAP[c]                         | Transport, Extracellular |                                                                                                      |
| peptide transport in via proton symport                 | Membrane | H[e] + PEPD[e] -> H[c] + PEPD[c]         | Transport, Extracellular |                                                                                                      |
| Phenethyl acetate transport (extracellular)             | Membrane | PHEAC[c] -> PHEAC[e]                     | Transport, Extracellular |                                                                                                      |
| L-phenylalanine reversible transport via proton symport | Membrane | H[e] + PHE[e] <> H[c] + PHE[c]           | Transport, Extracellular |                                                                                                      |
| phosphate reversible transport via symport              | Membrane | H[e] + Pi[e] <> H[c] + Pi[c]             | Transport, Extracellular | SPAC23D3.12<br>SPAC23D3.12<br>SPBC1683.01<br>SPCC2H8.02<br>SPBC8E4.01C<br>SPBC3B8.04c<br>SPAC23D3.12 |
| Pantothenate reversible transport via proton symport    | Membrane | H[e] + pnto-R[e] <> H[c] + pnto-R[c]     | Transport, Extracellular |                                                                                                      |
| L-proline reversible transport via proton symport       | Membrane | H[e] + PRO[e] <> H[c] + PRO[c]           | Transport, Extracellular |                                                                                                      |
| Pyruvate exchange, diffusion                            | Membrane | PYR[c] -> PYR[e]                         | Transport, Extracellular |                                                                                                      |

|                                                                                         |          |                                                  |                            |                                                             |
|-----------------------------------------------------------------------------------------|----------|--------------------------------------------------|----------------------------|-------------------------------------------------------------|
| pyruvate transport in via proton symport                                                | Membrane | H[e] + PYR[e] -> H[c] + PYR[c]                   | Transport, Extracellular   |                                                             |
| riboflavin transport in via proton symport                                              | Membrane | H[e] + ribflv[e] -> H[c] + ribflv[c]             | Transport, Extracellular   |                                                             |
| ribose transport in via proton symporter                                                | Membrane | H[e] + rib-D[e] -> H[c] + rib-D[c]               | Transport, Extracellular   |                                                             |
| D-sorbitol transport via passive diffusion                                              | Membrane | sbt-D[e] <> sbt-D[c]                             | Transport, Extracellular   |                                                             |
| L-sorbitol transport via passive diffusion                                              | Membrane | sbt-L[e] <> sbt-L[c]                             | Transport, Extracellular   |                                                             |
| L-serine reversible transport via proton symport                                        | Membrane | H[e] + SER[e] <> H[c] + SER[c]                   | Transport, Extracellular   |                                                             |
| sulfite transport (efflux to extracellular)                                             | Membrane | SO3[c] -> SO3[e]                                 | Transport, Extracellular   |                                                             |
| sulfate uniport                                                                         | Membrane | SO4[e] -> SO4[c]                                 | Transport, Extracellular   | SPAC24H6.11C<br>SPCC320.05<br>SPBC3H7.02<br>SPAC869.05C     |
| spermidine transport in via proton antiport                                             | Membrane | H[c] + spmd[e] -> H[e] + spmd[c]                 | Transport, Extracellular   |                                                             |
| spermidine excretion (cytosol to extracellular)                                         | Membrane | spmd[c] -> spmd[e]                               | Transport, Extracellular   |                                                             |
| spermine transport via proton antiport                                                  | Membrane | H[c] + sprm[e] -> H[e] + sprm[c]                 | Transport, Extracellular   |                                                             |
| L-sorbosose reversible transport                                                        | Membrane | srb-L[e] <> srb-L[c]                             | Transport, Extracellular   |                                                             |
| succinate transport via proton symport                                                  | Membrane | H[e] + SUCC[e] <> H[c] + SUCC[c]                 | Transport, Extracellular   |                                                             |
| sucrose transport in via proton symport                                                 | Membrane | H[e] + suc[r] -> H[c] + suc[r]                   | Transport, Extracellular   | SPAC2F3.08                                                  |
| taURIne transport                                                                       | Membrane | taur[c] <> taur[e]                               | Transport, Extracellular   |                                                             |
| thymidine transport in via proton symport                                               | Membrane | H[e] + THYMD[e] -> H[c] + THYMD[c]               | Transport, Extracellular   |                                                             |
| Thiamine transport in via proton symport                                                | Membrane | H[e] + THM[e] -> H[c] + THM[c]                   | Transport, Extracellular   |                                                             |
| L-treonine reversible transport via proton symport                                      | Membrane | H[e] + THR[e] <> H[c] + THR[c]                   | Transport, Extracellular   |                                                             |
| thymine reversible transport via proton antiport                                        | Membrane | H[e] + THYM[c] <> H[c] + THYM[e]                 | Transport, Extracellular   |                                                             |
| trehalose transport in via proton symporter                                             | Membrane | H[e] + TRE[e] -> H[c] + TRE[c]                   | Transport, Extracellular   |                                                             |
| L-tryptophan reversible transport via proton symport                                    | Membrane | H[e] + TRP[e] <> H[c] + TRP[c]                   | Transport, Extracellular   |                                                             |
| fatty acid transport                                                                    | Membrane | C140[e] <> C140[c]                               | Transport, Extracellular   |                                                             |
| L-tyrosine reversible transport via proton symport                                      | Membrane | H[e] + TYR[e] <> H[c] + TYR[c]                   | Transport, Extracellular   |                                                             |
| uracil transport in via proton symport                                                  | Membrane | H[e] + ura[e] -> H[c] + ura[c]                   | Transport, Extracellular   | SPAC1399.03<br>SPAC29B12.14C<br>SPBC23G7.13C<br>SPAC869.03C |
| urea reversible transport via proton symport (2 H+)                                     | Membrane | (2 na[e] + urea[e] <> 2 na[c] + urea[c]          | Transport, Extracellular   |                                                             |
| URIdine transport in via proton symport                                                 | Membrane | H[e] + URI[e] -> H[c] + URI[c]                   | Transport, Extracellular   |                                                             |
| L-valine reversible transport via proton symport                                        | Membrane | H[e] + VAL[e] <> H[c] + VAL[c]                   | Transport, Extracellular   |                                                             |
| xanthine reversible transport                                                           | Membrane | XAN[e] <> XAN[c]                                 | Transport, Extracellular   |                                                             |
| xanthosine transport in via proton symport                                              | Membrane | H[e] + xtsn[e] -> H[c] + xtsn[c]                 | Transport, Extracellular   |                                                             |
| D-xylose reversible transport                                                           | Membrane | xyl-D[e] <> xyl-D[c]                             | Transport, Extracellular   |                                                             |
| Xylitol transport via passive diffusion                                                 | Membrane | xyl[e] <> xyl[c]                                 | Transport, Extracellular   |                                                             |
| zymosterol reversible transport                                                         | Membrane | zymst[e] <> zymst[c]                             | Transport, Extracellular   |                                                             |
| MF3 myo-inositol transporter                                                            | Membrane | inos[e] <> inos [c]                              | Transport, Extracellular   | SPAC20G8.03<br>SPAC4F8.15<br>SPAC4F8.15<br>SPAC20G8.03      |
| myo-inositol transporter Itr1                                                           | Membrane | inos[e] <> inos [c]                              | Transport, Extracellular   |                                                             |
| CO2 Golgi transport                                                                     | Membrane | CO2[c] <> CO2[g]                                 | Transport, Golgi Apparatus |                                                             |
| GDP-mannose antiport                                                                    | Membrane | GDPmann[c] + GMP[g] -> GDPmann[g] + GMP[c]       | Transport, Golgi Apparatus | SPAC144.18                                                  |
| GDP Golgi transport via proton antiport                                                 | Membrane | GDP[g] + H[c] <> GDP[c] + H[g]                   | Transport, Golgi Apparatus |                                                             |
| phosphatidylethanolamine Golgi transport                                                | Membrane | pe [c] <> pe [g]                                 | Transport, Golgi Apparatus |                                                             |
| phosphatidylserine Golgi transport                                                      | Membrane | ps [c] <> ps [g]                                 | Transport, Golgi Apparatus |                                                             |
| UDPGalactose transport (Golgi apparatus)                                                | Membrane | UDPgall[c] -> UDPgall[g]                         | Transport, Golgi Apparatus |                                                             |
| Diphosphate Mitochondrial transport                                                     | Membrane | PPi[c] <> PPi[m]                                 | Transport, Mitochondrial   |                                                             |
| 2-Dehydro-3-deoxy-D-arabino-heptonoate7-phosphate mitochondrial transport via diffusion | Membrane | 2dda7p[c] <> 2dda7p[m]                           | Transport, Mitochondrial   |                                                             |
| 2-Dehydropanoate mitochondrial transport                                                | Membrane | 2DHP[c] <> 2DHP[m]                               | Transport, Mitochondrial   |                                                             |
| 2-Methylbutanal transport (mitochondrial)                                               | Membrane | 2mbald[c] <> 2mbald[m]                           | Transport, Mitochondrial   |                                                             |
| 2-methyl-1-butanol transport (mitochondrial)                                            | Membrane | 2mbtoH[c] <> 2mbtoH[m]                           | Transport, Mitochondrial   |                                                             |
| 2-methylpropanal transport (mitochondrial)                                              | Membrane | 2mpall[c] <> 2mpall[m]                           | Transport, Mitochondrial   |                                                             |
| 2obut transporter (mitochondrial)                                                       | Membrane | 2obut[c] <> 2obut[m]                             | Transport, Mitochondrial   |                                                             |
| 2-oxoadipate transport out of mitochondria via diffusion                                | Membrane | 2oxoADP[m] -> 2oxoADP[c]                         | Transport, Mitochondrial   |                                                             |
| 2-phenylethanol reversible transport                                                    | Membrane | 2PHETOH[m] <> 2PHETOH[c]                         | Transport, Mitochondrial   |                                                             |
| 3-(4-hydroxyphenyl)pyruvate mitochondrial transport via proton symport                  | Membrane | 34Hpp[c] + H[c] <> 34Hpp[m] + H[m]               | Transport, Mitochondrial   |                                                             |
| 2-Isopropylmalate transport, diffusion                                                  | Membrane | 3c3Hmp[c] <> 3c3Hmp[m]                           | Transport, Mitochondrial   |                                                             |
| 3-Carboxy-4-methyl-2-oxopentanoate transport, diffusion                                 | Membrane | 3c4MOP[c] <> 3c4MOP[m]                           | Transport, Mitochondrial   |                                                             |
| 3-Hexaprenyl-4,5-dihydroxybenzoate transport                                            | Membrane | 3H45DHBZ[c] <> 3H45DHBZ[m]                       | Transport, Mitochondrial   |                                                             |
| 3-methylbutanal transport (mitochondrial)                                               | Membrane | 3mbald[c] <> 3mbald[m]                           | Transport, Mitochondrial   |                                                             |
| 3-methyl-2-oxobutanoate transport, diffusion                                            | Membrane | 3MOB[c] <> 3MOB[m]                               | Transport, Mitochondrial   |                                                             |
| 3-Methyl-2-oxopentanoate transport, diffusion                                           | Membrane | 3MOP[c] <> 3MOP[m]                               | Transport, Mitochondrial   |                                                             |
| 3-CO80prenyl-4-hydroxybenzoate mitochondrial transport                                  | Membrane | O4HBZ[c] <> O4HBZ[m]                             | Transport, Mitochondrial   |                                                             |
| 4-aminobutanol mitochondrial transport via diffusion                                    | Membrane | 4abutn[c] <> 4abutn[m]                           | Transport, Mitochondrial   |                                                             |
| 4-aminobutanoate mitochondrial transport via diffusion                                  | Membrane | 4abut[c] <> 4abut[m]                             | Transport, Mitochondrial   |                                                             |
| 4-Aminobenzoate mitochondrial transport via diffusion                                   | Membrane | PABA[c] <> PABA[m]                               | Transport, Mitochondrial   |                                                             |
| 4-hydroxy-2-oxoglutarate mitochondrial transport via diffusion                          | Membrane | 4H2Ogl[c] <> 4H2Ogl[m]                           | Transport, Mitochondrial   |                                                             |
| 4-Hydroxybenzoate mitochondrial transport                                               | Membrane | 4Hbz[c] <> 4Hbz[m]                               | Transport, Mitochondrial   |                                                             |
| trans-4-hydroxy-L-proline mitochondrial transport via diffusion                         | Membrane | 4HPROT[c] <> 4HPROT[m]                           | Transport, Mitochondrial   |                                                             |
| 5-Aminolevulinat mitochondrial transport                                                | Membrane | 5aop[c] <> 5aop[m]                               | Transport, Mitochondrial   |                                                             |
| acetaldehyde mitochondrial diffusion                                                    | Membrane | ACAL[m] <> ACAL[c]                               | Transport, Mitochondrial   |                                                             |
| acetate transport                                                                       | Membrane | AC[c] <> AC[m]                                   | Transport, Mitochondrial   |                                                             |
| adenine reversible transport                                                            | Membrane | ADE[c] <> ADE[m]                                 | Transport, Mitochondrial   |                                                             |
| S-adenosyl-L-homocysteine reversible transport                                          | Membrane | SAH[c] <> SAH[m]                                 | Transport, Mitochondrial   |                                                             |
| Alanine transport from mitochondria to cytoplasm                                        | Membrane | ALA[m] -> ALA[c]                                 | Transport, Mitochondrial   |                                                             |
| S-Adenosyl-L-methionine reversible transport                                            | Membrane | SAM[c] <> SAM[m]                                 | Transport, Mitochondrial   |                                                             |
| arginine mitochondrial transport via proton symport                                     | Membrane | ARG[c] + H[c] <> ARG[m] + H[m]                   | Transport, Mitochondrial   |                                                             |
| asparagine mitochondrial transport via proton transport                                 | Membrane | ASN[c] + H[c] <> ASN[m] + H[m]                   | Transport, Mitochondrial   |                                                             |
| Aspartate-glutamate transporter                                                         | Membrane | ASP[m] + GLU[c] -> ASP[c] + GLU[m]               | Transport, Mitochondrial   |                                                             |
| aspartate mitochondrial transport via proton symport                                    | Membrane | ASP[c] + H[c] <> ASP[m] + H[m]                   | Transport, Mitochondrial   |                                                             |
| ADP/ATP transporter                                                                     | Membrane | ADP[c] + ATP[m] + H[c] -> ADP[m] + ATP[c] + H[m] | Transport, Mitochondrial   | SPBC530.10C                                                 |
| citrate transport                                                                       | Membrane | CIT[c] + MAL[m] <> CIT[m] + MAL[c]               | Transport, Mitochondrial   |                                                             |
| citrate transport                                                                       | Membrane | CIT[c] + PEP[m] <> CIT[m] + PEP[c]               | Transport, Mitochondrial   |                                                             |
| citrate transport                                                                       | Membrane | CIT[c] + ICTT[m] <> CIT[m] + ICTT[c]             | Transport, Mitochondrial   |                                                             |

|                                                                    |          |                                                        |                          |               |
|--------------------------------------------------------------------|----------|--------------------------------------------------------|--------------------------|---------------|
| CO2 transport (diffusion)                                          | Membrane | CO2[c] <=> CO2[m]                                      | Transport, Mitochondrial |               |
| CoA transporter (mitochondrial)                                    | Membrane | CoA[c] -> CoA[m]                                       | Transport, Mitochondrial |               |
| CTP/CMP antiport                                                   | Membrane | CMP[m] + CTP[c] + 2 H[c] -> CMP[c] + CTP[m] + 2 H[m]   | Transport, Mitochondrial | SPAC688.09    |
| D-lactate/pyruvate antiport                                        | Membrane | dLAC[c] + PYR[m] <=> dLAC[m] + PYR[c]                  | Transport, Mitochondrial |               |
| D-lactate transport                                                | Membrane | H[c] + dLAC[c] <=> H[m] + dLAC[m]                      | Transport, Mitochondrial |               |
| dihydroxyacetone phosphate transport                               | Membrane | DHAP[m] -> DHAP[c]                                     | Transport, Mitochondrial |               |
| dihydrofolate reversible mitochondrial transport                   | Membrane | DHF[c] <=> DHF[m]                                      | Transport, Mitochondrial |               |
| dhprt mitochondrial transport                                      | Membrane | DHNPT[c] <=> DHNPT[m]                                  | Transport, Mitochondrial |               |
| Dihydropteroate mitochondrial transport via diffusion              | Membrane | DHPT[c] <=> DHPT[m]                                    | Transport, Mitochondrial |               |
| L-erythro-4-hydroxyglutamate mitochondrial transport via diffusion | Membrane | e4HGLU[c] <=> e4HGLU[m]                                | Transport, Mitochondrial |               |
| D-erythrose 4-phosphate mitochondrial transport via diffusion      | Membrane | E4P[c] <=> E4P[m]                                      | Transport, Mitochondrial |               |
| ethanol transport to mitochondria (diffusion)                      | Membrane | ETOH[c] <=> ETOH[m]                                    | Transport, Mitochondrial |               |
| fatty-acyl-ACP mitochondrial transport                             | Membrane | C120ACP[m] -> C120ACP[c]                               | Transport, Mitochondrial |               |
| fatty-acyl-ACP mitochondrial transport                             | Membrane | C140ACP[m] -> C140ACP[c]                               | Transport, Mitochondrial |               |
| fatty-acyl-ACP mitochondrial transport                             | Membrane | C141ACP[m] -> C141ACP[c]                               | Transport, Mitochondrial |               |
| fatty-acyl-ACP mitochondrial transport                             | Membrane | C160ACP[m] -> C160ACP[c]                               | Transport, Mitochondrial |               |
| fatty-acyl-ACP mitochondrial transport                             | Membrane | C161ACP[m] -> C161ACP[c]                               | Transport, Mitochondrial |               |
| fatty-acyl-ACP mitochondrial transport                             | Membrane | C180ACP[m] -> C180ACP[c]                               | Transport, Mitochondrial |               |
| fatty-acyl-ACP mitochondrial transport                             | Membrane | C181ACP[m] -> C181ACP[c]                               | Transport, Mitochondrial |               |
| fatty-acyl-ACP mitochondrial transport                             | Membrane | C182ACP[m] -> C182ACP[c]                               | Transport, Mitochondrial |               |
| FAD/FMN antiport                                                   | Membrane | fad[c] + fmn[m] -> fad[m] + fmn[c]                     | Transport, Mitochondrial | SPBC27B12.09C |
| iron (II) uptake (mitochondrial)                                   | Membrane | fe2[c] -> fe2[m]                                       | Transport, Mitochondrial |               |
| iron (II) transport                                                | Membrane | fe2[m] -> fe2[c]                                       | Transport, Mitochondrial |               |
| formate mitochondrial transport                                    | Membrane | for[m] -> for[c]                                       | Transport, Mitochondrial |               |
| fumarate reductase/mitochondrial                                   | Membrane | FADH2[m] + FUM[c] -> fad[m] + SUCC[c]                  | Transport, Mitochondrial | SPAC17A2.05   |
| farnesyl diphosphate transport (mitochondrial)                     | Membrane | FRPP[c] <=> FRPP[m]                                    | Transport, Mitochondrial |               |
| glycoaldehyde mitochondrial transport                              | Membrane | gcald[c] <=> gcald[m]                                  | Transport, Mitochondrial |               |
| L-glutamate transport into mitochondria via hydroxide ion antiport | Membrane | GLU[c] + oH1[m] -> GLU[m] + oH1[c]                     | Transport, Mitochondrial |               |
| Glutamate transport (uniporter)                                    | Membrane | GLU[c] -> GLU[m]                                       | Transport, Mitochondrial |               |
| glycerol-3-phosphate shuttle                                       | Membrane | GLYC3p[c] -> GLYC3p[m]                                 | Transport, Mitochondrial |               |
| glycine mitochondrial transport via proton symport                 | Membrane | GLY[c] + H[c] <=> GLY[m] + H[m]                        | Transport, Mitochondrial |               |
| guanosine mitochondrial transport via proton symport               | Membrane | GSN[c] + H[c] <=> GSN[m] + H[m]                        | Transport, Mitochondrial |               |
| GTP/GDP translocase (electroneutral)                               | Membrane | GDP[m] + GTP[c] + H[c] -> GDP[c] + GTP[m] + H[m]       | Transport, Mitochondrial |               |
| guanine mitochondrial transport via diffusion                      | Membrane | GUA[c] <=> GUA[m]                                      | Transport, Mitochondrial |               |
| H2O transport                                                      | Membrane | H2O[c] <=> H2O[m]                                      | Transport, Mitochondrial |               |
| all-trans-hexaprenyl diphosphate transport                         | Membrane | HXPP[c] <=> HXPP[m]                                    | Transport, Mitochondrial |               |
| histidine mitochondrial transport via proton symport               | Membrane | H[m] + HIS[m] <=> H[c] + HIS[c]                        | Transport, Mitochondrial |               |
| Hydroxymethylglutaryl-CoA reversible mitochondrial transport       | Membrane | HmgCoA[c] <=> HmgCoA[m]                                | Transport, Mitochondrial |               |
| isoamyl alcohol transport (mitochondrial)                          | Membrane | IAMOH[c] <=> IAMOH[m]                                  | Transport, Mitochondrial |               |
| isobutyl alcohol transport (mitochondrial)                         | Membrane | IBUTOH[c] <=> IBUTOH[m]                                | Transport, Mitochondrial |               |
| indole-3-acetaldehyde mitochondrial transport via diffusion        | Membrane | id3acald[c] <=> id3acald[m]                            | Transport, Mitochondrial |               |
| Isoleucine transport from mitochondria to cytosol                  | Membrane | ILE[m] -> ILE[c]                                       | Transport, Mitochondrial |               |
| indole-3-acetate mitochondrial transport via diffusion             | Membrane | ind3ac[c] <=> ind3ac[m]                                | Transport, Mitochondrial |               |
| Tryptophol transport (mitochondrial)                               | Membrane | ind3etH[c] <=> ind3etH[m]                              | Transport, Mitochondrial |               |
| Isopentenyl diphosphate transport                                  | Membrane | IPPP[c] <=> IPPP[m]                                    | Transport, Mitochondrial |               |
| L-lactate transport                                                | Membrane | H[c] + LAC[c] <=> H[m] + LAC[m]                        | Transport, Mitochondrial |               |
| Lysine mitochondrial transport via proton symport                  | Membrane | H[c] + LYS[c] <=> H[m] + LYS[m]                        | Transport, Mitochondrial |               |
| malate transport                                                   | Membrane | MAL[c] + Pi[m] <=> MAL[m] + Pi[c]                      | Transport, Mitochondrial |               |
| methionine mitochondrial transport via proton symport              | Membrane | H[m] + MET[m] <=> H[c] + MET[c]                        | Transport, Mitochondrial |               |
| NH3 mitochondrial transport                                        | Membrane | NH4[c] <=> NH4[m]                                      | Transport, Mitochondrial |               |
| NMN mitochondrial transport via proton symport                     | Membrane | H[c] + nmn[c] <=> H[m] + nmn[m]                        | Transport, Mitochondrial |               |
| O2 transport (diffusion)                                           | Membrane | O2[c] <=> O2[m]                                        | Transport, Mitochondrial |               |
| oxaloacetate transport                                             | Membrane | H[c] + OAA[c] <=> H[m] + OAA[m]                        | Transport, Mitochondrial | SPAC139.02C   |
| ornithine mitochondrial transport via proton antiport              | Membrane | H[c] + ORN[m] <=> H[m] + ORN[c]                        | Transport, Mitochondrial |               |
| 2-oxodicarboxylate transporter                                     | Membrane | AKG[m] + oxag[c] <=> AKG[c] + oxag[m]                  | Transport, Mitochondrial |               |
| Phenylacetaldehyde transport (mitochondrial)                       | Membrane | PACALD[c] <=> PACALD[m]                                | Transport, Mitochondrial |               |
| panthetheine 4'-phosphate reversible mitochondrial transport       | Membrane | pan4p[c] <=> pan4p[m]                                  | Transport, Mitochondrial |               |
| panthoenate mitochondrial transport                                | Membrane | pant-R[c] <=> pant-R[m]                                | Transport, Mitochondrial |               |
| Adenosine 3',5'-bisphosphate mitochondrial transport               | Membrane | PAP[c] <=> PAP[m]                                      | Transport, Mitochondrial |               |
| phosphatidate reversible transport                                 | Membrane | pa [c] <=> pa [m]                                      | Transport, Mitochondrial |               |
| all-trans-Pentaprenyl diphosphate transport                        | Membrane | PNPP[c] <=> PNPP[m]                                    | Transport, Mitochondrial |               |
| phosphatidylethanolamine mitochondrial transport                   | Membrane | pe [c] <=> pe [m]                                      | Transport, Mitochondrial |               |
| Phenylalanine mitochondrial transport via proton symport           | Membrane | H[m] + PHE[m] <=> H[c] + PHE[c]                        | Transport, Mitochondrial |               |
| phosphate transporter                                              | Membrane | H[c] + Pi[c] <=> H[m] + Pi[m]                          | Transport, Mitochondrial | SPBC1703.13C  |
| phosphate transport via hydroxide ion symport                      | Membrane | oH1[m] + Pi[c] <=> oH1[c] + Pi[m]                      | Transport, Mitochondrial |               |
| protoporphyrinogen IX mitochondrial transport                      | Membrane | pppg9[c] <=> pppg9[m]                                  | Transport, Mitochondrial |               |
| L-proline transport                                                | Membrane | PRO[c] <=> PRO[m]                                      | Transport, Mitochondrial |               |
| PRPP reversible transport                                          | Membrane | PRPP[c] <=> PRPP[m]                                    | Transport, Mitochondrial |               |
| phosphatidylserine mitochondrial transport                         | Membrane | ps [c] <=> ps [m]                                      | Transport, Mitochondrial |               |
| pyruvate mitochondrial transport via proton symport                | Membrane | H[c] + PYR[c] <=> H[m] + PYR[m]                        | Transport, Mitochondrial |               |
| Quinolinate reversible mitochondrial transport                     | Membrane | Qln[c] <=> Qln[m]                                      | Transport, Mitochondrial |               |
| Riboflavin reversible mitochondrial transport                      | Membrane | ribflv[c] <=> ribflv[m]                                | Transport, Mitochondrial |               |
| serine mitochondrial transport via proton symport                  | Membrane | H[c] + SER[c] <=> H[m] + SER[m]                        | Transport, Mitochondrial |               |
| succinate transport                                                | Membrane | Pi[m] + SUCC[c] -> Pi[c] + SUCC[m]                     | Transport, Mitochondrial |               |
| succinate-fumarate transport                                       | Membrane | FUM[m] + SUCC[c] -> FUM[c] + SUCC[m]                   | Transport, Mitochondrial |               |
| Thiamine diphosphate transport                                     | Membrane | THMPP[c] -> THMPP[m]                                   | Transport, Mitochondrial |               |
| threonine mitochondrial transport via proton symport               | Membrane | H[c] + THR[c] <=> H[m] + THR[m]                        | Transport, Mitochondrial |               |
| tryptophan mitochondrial transport via proton symport              | Membrane | H[c] + TRP[c] <=> H[m] + TRP[m]                        | Transport, Mitochondrial |               |
| tyrosine mitochondrial transport via proton symport                | Membrane | H[c] + TYR[c] <=> H[m] + TYR[m]                        | Transport, Mitochondrial |               |
| UTP/UMP antiport                                                   | Membrane | (2 H[c] + UMP[m] + UTP[c] -> 2 H[m] + UMP[c] + UTP[m]) | Transport, Mitochondrial | SPAC688.09    |

|                                                                      |          |                                                                           |                          |
|----------------------------------------------------------------------|----------|---------------------------------------------------------------------------|--------------------------|
| Valine reversible mitochondrial transport via proton symport         | Membrane | $H[c] + VAL[c] \leftrightarrow H[m] + VAL[m]$                             | Transport, Mitochondrial |
| acetyl-CoA transport                                                 | Membrane | $ACCoA[c] \leftrightarrow ACCoA[n]$                                       | Transport, Nuclear       |
| 2-oxoglutarate nuclear transport via proton symport                  | Membrane | $AKG[c] + H[c] \leftrightarrow AKG[n] + H[n]$                             | Transport, Nuclear       |
| AMP transport via diffusion (cytosol to nucleus)                     | Membrane | $AMP[n] \leftrightarrow AMP[c]$                                           | Transport, Nuclear       |
| aspartate nuclear transport via proton symport                       | Membrane | $ASP[c] + H[c] \leftrightarrow ASP[n] + H[n]$                             | Transport, Nuclear       |
| L-aspartate nuclear transport via diffusion                          | Membrane | $ASP[n] \leftrightarrow ASP[c]$                                           | Transport, Nuclear       |
| N-carbonyl-L-aspartate transport, diffusion                          | Membrane | $cbasp[n] \leftrightarrow cbasp[c]$                                       | Transport, Nuclear       |
| carbamoyl phosphate nuclear transport via diffusion                  | Membrane | $cbp[c] \leftrightarrow cbp[n]$                                           | Transport, Nuclear       |
| CDP nuclear transport                                                | Membrane | $CDP[c] \leftrightarrow CDP[n]$                                           | Transport, Nuclear       |
| CO2 nuclear transport via diffusion                                  | Membrane | $CO2[n] \leftrightarrow CO2[c]$                                           | Transport, Nuclear       |
| coenzyme A transport                                                 | Membrane | $CoA[c] \leftrightarrow CoA[n]$                                           | Transport, Nuclear       |
| DADP nuclear transport                                               | Membrane | $dADP[c] \leftrightarrow dADP[n]$                                         | Transport, Nuclear       |
| dCDP nuclear transport                                               | Membrane | $dCDP[c] \leftrightarrow dCDP[n]$                                         | Transport, Nuclear       |
| dGDP nuclear transport                                               | Membrane | $dGDP[c] \leftrightarrow dGDP[n]$                                         | Transport, Nuclear       |
| dUMP nuclear transport                                               | Membrane | $dUMP[c] \leftrightarrow dUMP[n]$                                         | Transport, Nuclear       |
| GDP nuclear transport                                                | Membrane | $GDP[c] \leftrightarrow GDP[n]$                                           | Transport, Nuclear       |
| glutamine nuclear transport via proton symport                       | Membrane | $GLN[c] + H[c] \leftrightarrow GLN[n] + H[n]$                             | Transport, Nuclear       |
| glutamate nuclear transport via proton symport                       | Membrane | $GLU[c] + H[c] \leftrightarrow GLU[n] + H[n]$                             | Transport, Nuclear       |
| hydrogen peroxide nuclear transport                                  | Membrane | $H2O2[c] \leftrightarrow H2O2[n]$                                         | Transport, Nuclear       |
| H2O transport                                                        | Membrane | $H2O[n] \leftrightarrow H2O[c]$                                           | Transport, Nuclear       |
| bicarbonate nuclear transport via diffusion                          | Membrane | $HCO3[c] \leftrightarrow HCO3[n]$                                         | Transport, Nuclear       |
| 4-Aminobenzoate mitochondrial transport via diffusion                | Membrane | $PABA[c] \leftrightarrow PABA[n]$                                         | Transport, Nuclear       |
| 1D-myo-Inositol 1,4,5-trisphosphate nuclear transport via diffusion  | Membrane | $mi145p[c] \leftrightarrow mi145p[n]$                                     | Transport, Nuclear       |
| inositol hexakisphosphate nuclear transport (diffusion)              | Membrane | $minoHp[c] \leftrightarrow minoHp[n]$                                     | Transport, Nuclear       |
| NAD transport through pores                                          | Membrane | $NAD[n] \leftrightarrow NAD[c]$                                           | Transport, Nuclear       |
| ammonia nuclear transport                                            | Membrane | $NH4[c] \leftrightarrow NH4[n]$                                           | Transport, Nuclear       |
| phosphate nuclear transport via proton symport                       | Membrane | $H[c] + Pi[c] \leftrightarrow H[n] + Pi[n]$                               | Transport, Nuclear       |
| phosphatidyl-1D-myo-inositol nuclear transport                       | Membrane | $ptd1ino [c] \leftrightarrow ptd1ino [n]$                                 | Transport, Nuclear       |
| phosphatidyl-1D-myo-4-inositol nuclear transport                     | Membrane | $ptd4ino [c] \leftrightarrow ptd4ino [n]$                                 | Transport, Nuclear       |
| UMP nuclear transport                                                | Membrane | $UMP[c] \leftrightarrow UMP[n]$                                           | Transport, Nuclear       |
| 3-(4-hydroxyphenyl)pyruvate peroxisomal transport via proton symport | Membrane | $34Hpp[c] + H[c] \leftrightarrow 34Hpp[x] + H[x]$                         | Transport, Peroxisomal   |
| 4-hydroxy-2-oxoglutarate peroxisomal transport via diffusion         | Membrane | $4H2Ogl[c] \leftrightarrow 4H2Ogl[x]$                                     | Transport, Peroxisomal   |
| acetate transport                                                    | Membrane | $ac[c] \leftrightarrow ac[x]$                                             | Transport, Peroxisomal   |
| AKG transporter, peroxisome                                          | Membrane | $AKG[c] \leftrightarrow AKG[x]$                                           | Transport, Peroxisomal   |
| aspartate-glutamate peroxisomal shuttle                              | Membrane | $ASP[c] + GLU[x] \leftrightarrow ASP[x] + GLU[c]$                         | Transport, Peroxisomal   |
| AMP/ATP transporter                                                  | Membrane | $AMP[x] + ATP[c] + H[x] \rightarrow AMP[c] + ATP[x] + H[c]$               | Transport, Peroxisomal   |
| ADP/ATP transporter                                                  | Membrane | $ADP[x] + ATP[c] + H[x] \rightarrow ADP[c] + ATP[x] + H[c]$               | Transport, Peroxisomal   |
| citrate/malate antiport into peroxisome                              | Membrane | $CIT[x] + MAL[c] \leftrightarrow CIT[c] + MAL[x]$                         | Transport, Peroxisomal   |
| citrate/isocitrate antiport into peroxisome                          | Membrane | $CIT[c] + ICIT[x] \leftrightarrow CIT[x] + ICIT[c]$                       | Transport, Peroxisomal   |
| CO2 peroxisomal transport                                            | Membrane | $CO2[c] \leftrightarrow CO2[x]$                                           | Transport, Peroxisomal   |
| cystathione peroxisomal transport                                    | Membrane | $cyst-L[c] \leftrightarrow cyst-L[x]$                                     | Transport, Peroxisomal   |
| L-erythro-4-hydroxyglutamate peroxisomal transport via diffusion     | Membrane | $e4HGLU[c] \leftrightarrow e4HGLU[x]$                                     | Transport, Peroxisomal   |
| fatty acid peroxisomal transport                                     | Membrane | $C100[c] \rightarrow C100[x]$                                             | Transport, Peroxisomal   |
| fatty acid peroxisomal transport                                     | Membrane | $C120[c] \rightarrow C120[x]$                                             | Transport, Peroxisomal   |
| fatty acid peroxisomal transport                                     | Membrane | $C141[c] \rightarrow C141[x]$                                             | Transport, Peroxisomal   |
| fatty acid peroxisomal transport                                     | Membrane | $C160[c] \rightarrow C160[x]$                                             | Transport, Peroxisomal   |
| fatty acid peroxisomal transport                                     | Membrane | $C140[c] \rightarrow C140[x]$                                             | Transport, Peroxisomal   |
| fatty acid peroxisomal transport                                     | Membrane | $C161[c] \rightarrow C161[x]$                                             | Transport, Peroxisomal   |
| fatty acid peroxisomal transport                                     | Membrane | $C080[c] \rightarrow C080[x]$                                             | Transport, Peroxisomal   |
| glyoxylate transport                                                 | Membrane | $GLX[c] \leftrightarrow GLX[x]$                                           | Transport, Peroxisomal   |
| H2O transport                                                        | Membrane | $H2O[c] \leftrightarrow H2O[x]$                                           | Transport, Peroxisomal   |
| Homocysteine peroxisomal transport via proton symport                | Membrane | $H[c] + HCYS[c] \leftrightarrow H[x] + HCYS[x]$                           | Transport, Peroxisomal   |
| malate/oxaloacetate shuttle                                          | Membrane | $MAL[x] + OAA[c] \leftrightarrow MAL[c] + OAA[x]$                         | Transport, Peroxisomal   |
| ammonia peroxisomal transport                                        | Membrane | $NH4[c] \leftrightarrow NH4[x]$                                           | Transport, Peroxisomal   |
| NMN peroxisomal transport via proton symport                         | Membrane | $H[c] + nmn[c] \leftrightarrow H[x] + nmn[x]$                             | Transport, Peroxisomal   |
| phosphate peroxisomal transport via proton symport                   | Membrane | $H[c] + Pi[c] \leftrightarrow H[x] + Pi[x]$                               | Transport, Peroxisomal   |
| pyruvate peroxisomal transport via proton symport                    | Membrane | $H[c] + PYR[c] \leftrightarrow H[x] + PYR[x]$                             | Transport, Peroxisomal   |
| oxidized thioredoxin peroxisomal transport via diffusion             | Membrane | $TRDox[c] \leftrightarrow TRDox[x]$                                       | Transport, Peroxisomal   |
| reduced thioredoxin peroxisomal transport via diffusion              | Membrane | $TRDrd[c] \leftrightarrow TRDrd[x]$                                       | Transport, Peroxisomal   |
| tyrosine peroxisomal transport via proton symport                    | Membrane | $H[c] + TYR[c] \leftrightarrow H[x] + TYR[x]$                             | Transport, Peroxisomal   |
| L-arginine transport in via proton antiport                          | Membrane | $ARG[c] + H[v] \rightarrow ARG[v] + H[c]$                                 | Transport, Vacuolar      |
| L-asparagine transport in via proton antiport (vacuolar)             | Membrane | $ASN[c] + H[v] \rightarrow ASN[v] + H[c]$                                 | Transport, Vacuolar      |
| L-asparagine transport out via proton symport                        | Membrane | $ASN[v] + H[v] \rightarrow ASN[c] + H[c]$                                 | Transport, Vacuolar      |
| L-aspartate transport out via proton symport                         | Membrane | $ASP[v] + H[v] \rightarrow ASP[c] + H[c]$                                 | Transport, Vacuolar      |
| CO2 vacuolar transport                                               | Membrane | $CO2[c] \leftrightarrow CO2[v]$                                           | Transport, Vacuolar      |
| Glycogen vacuolar 'transport' via autophagy                          | Membrane | $GLYCogen[c] \rightarrow GLYCogen[v]$                                     | Transport, Vacuolar      |
| glucose transport                                                    | Membrane | $GLC[c] \leftrightarrow GLC[v]$                                           | Transport, Vacuolar      |
| L-glutamine transport in via proton antiport (vacuolar)              | Membrane | $GLN[c] + H[v] \rightarrow GLN[v] + H[c]$                                 | Transport, Vacuolar      |
| L-glutamine transport out via proton symport                         | Membrane | $GLN[v] + H[v] \rightarrow GLN[c] + H[c]$                                 | Transport, Vacuolar      |
| L-glutamate transport out via proton symport                         | Membrane | $GLU[v] + H[v] \rightarrow GLU[c] + H[c]$                                 | Transport, Vacuolar      |
| Reduced glutathione via ABC system (vacuolar)                        | Membrane | $ATP[v] + GTHrd[c] + H2O[v] \rightarrow ADP[v] + GTHrd[v] + H[v] + Pi[v]$ | Transport, Vacuolar      |
| H2O transport                                                        | Membrane | $H2O[c] \leftrightarrow H2O[v]$                                           | Transport, Vacuolar      |
| L-histidine transport in via proton antiport (vacuolar)              | Membrane | $H[v] + HIS[c] \rightarrow H[c] + HIS[v]$                                 | Transport, Vacuolar      |
| L-isoleucine transport in via proton antiport (vacuolar)             | Membrane | $H[v] + ILE[c] \rightarrow H[c] + ILE[v]$                                 | Transport, Vacuolar      |
| L-isoleucine transport out via proton symport                        | Membrane | $H[v] + ILE[v] \rightarrow H[c] + ILE[c]$                                 | Transport, Vacuolar      |
| L-cystine transport via proton symport (vacuolar)                    | Membrane | $Lcystin[v] + H[v] \rightarrow Lcystin[c] + H[c]$                         | Transport, Vacuolar      |
| L-leucine transport in via proton antiport (vacuolar)                | Membrane | $H[v] + LEU[c] \rightarrow H[c] + LEU[v]$                                 | Transport, Vacuolar      |
| L-leucine transport out via proton symport                           | Membrane | $H[v] + LEU[v] \rightarrow H[c] + LEU[c]$                                 | Transport, Vacuolar      |
| L-lysine transport in via proton antiport (vacuolar)                 | Membrane | $H[v] + LYS[c] \rightarrow H[c] + LYS[v]$                                 | Transport, Vacuolar      |
| phosphatidylethanolamine vacuolar transport                          | Membrane | $pe [c] \leftrightarrow pe [v]$                                           | Transport, Vacuolar      |
| phosphate vacuolar transport via proton symport                      | Membrane | $H[c] + Pi[c] \leftrightarrow H[v] + Pi[v]$                               | Transport, Vacuolar      |

|                                                                                                                |                 |                                                                  |                                         |                                                            |
|----------------------------------------------------------------------------------------------------------------|-----------------|------------------------------------------------------------------|-----------------------------------------|------------------------------------------------------------|
| phosphatidylserine vacuolar transport                                                                          | Membrane        | ps [c] <-> ps [v]                                                | Transport, Vacuolar                     |                                                            |
| Taurcholate via ABC system (vacuolar)                                                                          | Membrane        | ATP[v] + H2O[v] + tCHOLA[c] -> ADP[v] + H[v] + Pi[v] + tCHOLA[v] | Transport, Vacuolar                     |                                                            |
| trehalose vacuolar transport via proton symport                                                                | Membrane        | H[c] + TRE[c] <-> H[v] + TRE[v]                                  | Transport, Vacuolar                     |                                                            |
| L-tyrosine transport in via proton antiport (vacuolar)                                                         | Membrane        | H[v] + TYR[c] -> H[c] + TYR[v]                                   | Transport, Vacuolar                     |                                                            |
| L-tyrosine transport out via proton symport                                                                    | Membrane        | H[v] + TYR[v] -> H[c] + TYR[c]                                   | Transport, Vacuolar                     |                                                            |
| Alanyl-tRNA synthetase                                                                                         | Cytosol         | trnaALA + ALA + ATP -> ALAtrna + AMP + PPi                       | tRNA charging                           | SPAC23C11.09                                               |
| Arginyl-tRNA synthetase                                                                                        | Cytosol         | trnaARG + ARG + ATP -> ARGtrna + AMP + PPi                       | tRNA charging                           | SPBC25B2.09e                                               |
| Arginyl-tRNA synthetase                                                                                        | Mitochondria    | trnaARG + ARG + ATP -> ARGtrna + AMP + PPi                       | tRNA charging                           | SPBC25B2.09c                                               |
| Asparaginyl-tRNA synthetase                                                                                    | Cytosol         | trnaASN + ASN + ATP -> ASNtrna + AMP + PPi                       | tRNA charging                           | SPBC1773.10c                                               |
| asparaginyl-tRNA synthetase, mitochondrial                                                                     | Mitochondria    | trnaASN + ASN + ATP -> ASNtrna + AMP + PPi                       | tRNA charging                           | SPBC1198.10c                                               |
| Aspartyl-tRNA synthetase                                                                                       | Cytosol         | trnaASP + ASP + ATP -> ASPtrna + AMP + PPi                       | tRNA charging                           | SPCC1223.07c                                               |
| Aspartyl-tRNA synthetase                                                                                       | Mitochondria    | trnaASP + ASP + ATP -> ASPtrna + AMP + PPi                       | tRNA charging                           | SPCC736.06                                                 |
| Cysteinyl-tRNA synthetase                                                                                      | Cytosol         | trnaCYS + ATP + CYS -> CYStrna + AMP + PPi                       | tRNA charging                           | SPAC29E6.06c                                               |
| Methionyl-tRNA formyltransferase                                                                               | Mitochondria    | METtrna + 10FTHF -> IMETtrna + H + THF                           | tRNA charging                           | SPAC1805.09c                                               |
| Glutamyl-tRNA synthetase                                                                                       | Cytosol         | trnaGLN + GLN + ATP -> GLNtrna + AMP + PPi                       | tRNA charging                           | SPBC342.02                                                 |
| Glutamyl-tRNA synthetase                                                                                       | Cytosol         | trnaGLU + GLU + ATP -> GLUtrna + AMP + PPi                       | tRNA charging                           | SPAC17A5.15c                                               |
| glutamyl-tRNA synthetase                                                                                       | Mitochondria    | trnaGLU + GLU + ATP -> GLUtrna + AMP + PPi                       | tRNA charging                           | SPAB1A10.11c                                               |
| Glycyl-tRNA synthetase                                                                                         | Cytosol         | trnaGLY + GLY + ATP -> GLYtrna + AMP + PPi                       | tRNA charging                           | SPAC3F10.03                                                |
| Histidyl-tRNA synthetase                                                                                       | Cytosol         | trnaHIS + HIS + ATP -> HIStrna + AMP + PPi                       | tRNA charging                           | SPBC2G2.12                                                 |
| histidyl-tRNA synthetase                                                                                       | Mitochondria    | trnaHIS + HIS + ATP -> HIStrna + AMP + PPi                       | tRNA charging                           | SPBC2G2.12                                                 |
| Isoleucyl-tRNA synthetase                                                                                      | Cytosol         | trnaILE + ILE + ATP -> ILEtrna + AMP + PPi                       | tRNA charging                           | SPBC8D2.06                                                 |
| Isoleucyl-tRNA synthetase                                                                                      | Mitochondria    | trnaILE + ILE + ATP -> ILEtrna + AMP + PPi                       | tRNA charging                           | SPCC18B5.08c                                               |
| Leucyl-tRNA synthetase                                                                                         | Cytosol         | trnaLEU + LEU + ATP -> AMP + LEUtrna + PPi                       | tRNA charging                           | SPAC26F1.13c                                               |
| leucyl-tRNA synthetase                                                                                         | Mitochondria    | trnaLEU + LEU + ATP -> AMP + LEUtrna + PPi                       | tRNA charging                           | SPAC4G8.09                                                 |
| Lysyl-tRNA synthetase                                                                                          | Cytosol         | trnaLYS + LYS + ATP -> AMP + LYStrna + PPi                       | tRNA charging                           | SPBC17G9.03c                                               |
| Lysyl-tRNA synthetase                                                                                          | Mitochondria    | trnaLYS + LYS + ATP -> AMP + LYStrna + PPi                       | tRNA charging                           | SPCC18.08                                                  |
| Methionyl-tRNA synthetase                                                                                      | Cytosol         | trnaMET + MET + ATP -> METtrna + AMP + PPi                       | tRNA charging                           | SPBC17A3.04c                                               |
| methionyl-tRNA synthetase                                                                                      | Mitochondria    | trnaMET + MET + ATP -> METtrna + AMP + PPi                       | tRNA charging                           | SPAC27E2.06c                                               |
| Phenylalanyl-tRNA synthetase                                                                                   | Cytosol         | trnaPHE + PHE + ATP -> PHEtrna + AMP + PPi                       | tRNA charging                           | SPAC23A1.12c+SPAC3G9.06                                    |
| phenylalanyl-tRNA synthetase                                                                                   | Mitochondria    | trnaPHE + PHE + ATP -> PHEtrna + AMP + PPi                       | tRNA charging                           | SPCC736.03c                                                |
| Prolyl-tRNA synthetase                                                                                         | Cytosol         | trnaPRO + PRO + ATP -> PROtrna + AMP + PPi                       | tRNA charging                           | SPBC24C6.03<br>SPBC19C7.06<br>SPAC25B8.06c<br>SPAC29A4.15  |
| Seryl-tRNA synthetase                                                                                          | Cytosol         | trnaSER + SER + ATP -> SERtrna + AMP + PPi                       | tRNA charging                           | SPBC25H2.02                                                |
| Threonyl-tRNA synthetase                                                                                       | Cytosol         | trnaTHR + THR + ATP -> THRtrna + AMP + PPi                       | tRNA charging                           | SPAC24C9.09                                                |
| threonyl-tRNA synthetase                                                                                       | Mitochondria    | trnaTHR + THR + ATP -> THRtrna + AMP + PPi                       | tRNA charging                           | SPAC2F7.13c                                                |
| Tryptophanyl-tRNA synthetase                                                                                   | Cytosol         | trnaTRP + TRP + ATP -> TRPtrna + AMP + PPi                       | tRNA charging                           | SPAC3G9.13c                                                |
| Tryptophanyl-tRNA synthetase                                                                                   | Mitochondria    | trnaTRP + TRP + ATP -> TRPtrna + AMP + PPi                       | tRNA charging                           | SPCC1672.05c                                               |
| tyrosyl-tRNA synthetase                                                                                        | Cytosol         | trnaTYR + TYR + ATP -> TYRtrna + AMP + PPi                       | tRNA charging                           | SPCC576.06c                                                |
| tyrosyl-tRNA synthetase                                                                                        | Mitochondria    | trnaTYR + TYR + ATP -> TYRtrna + AMP + PPi                       | tRNA charging                           | SPAC4A8.08c<br>SPBC1709.02C<br>SPAC4A8.08c<br>SPBC1709.02C |
| Valyl-tRNA synthetase                                                                                          | Cytosol         | trnaVAL + VAL + ATP -> VALtrna + AMP + PPi                       | tRNA charging                           |                                                            |
| valyl-tRNA synthetase                                                                                          | Mitochondria    | trnaVAL + VAL + ATP -> VALtrna + AMP + PPi                       | tRNA charging                           |                                                            |
| S-Adenosyl-L-methionine:catechol O-methyltransferase                                                           | Vacuole         | SAM + DOP -> SAH + MOTAM                                         | Tyrosine, Tryptophan, and Phenylalanine | SPBPB21E7.04c 2.1.1.6                                      |
| 4-(2-Aminoethyl)-1,2-benzenediol:o2 oxidoreductase(deaminating)(flavin-containing)                             | Cytosol         | DOP + H2O + O2 -> DHPACAL + NH4 + H2O2                           | Tyrosine, Tryptophan, and Phenylalanine | SPAC2E1P3.04 1.4.3.21                                      |
| 3,4-Dihydroxyphenylacetaldehyde:nADP oxidoreductase                                                            | Cytosol         | DHPACAL + NADP + H2O <-> DHPAC + NADPH + H                       | Tyrosine, Tryptophan, and Phenylalanine | SPAC922.07c 1.2.1.5                                        |
| S-Adenosyl-L-methionine:catechol O-methyltransferase                                                           | Vacuole         | SAM + DHPAC -> SAH + HVAN                                        | Tyrosine, Tryptophan, and Phenylalanine | SPBPB21E7.04c 2.1.1.6                                      |
| Tyramine:o2 oxidoreductase(deaminating)(flavin-containing)                                                     | Cytosol         | TAM + H2O + O2 -> HPACAL + NH4 + H2O2                            | Tyrosine, Tryptophan, and Phenylalanine | SPAC2E1P3.04 1.4.3.21                                      |
| 4-Hydroxyphenylacetaldehyde:nADP oxidoreductase                                                                | Cytosol         | HPACAL + NADP + H2O <-> HPAC + NADPH + H                         | Tyrosine, Tryptophan, and Phenylalanine | SPAC922.07c 1.2.1.5                                        |
| 3-Methoxy-4-hydroxyphenylacetaldehyde:nADP oxidoreductase 3-HYDROXY-4-METHOXY-4-HYDROXYPHENYLACETALDEHYDE:nADP | Cytosol         | MOHPACAL + NADP + H2O -> HVAN + NADPH + H                        | Tyrosine, Tryptophan, and Phenylalanine | SPAC922.07c 1.2.1.5                                        |
| hydroxyphenylglycolaldehyde:nADP oxidoreductase                                                                | Cytosol         | MOHPGAL + NADP + H2O -> MOHMAN + NADPH + H                       | Tyrosine, Tryptophan, and Phenylalanine | SPAC922.07c 1.2.1.5                                        |
| 3,4-Dihydroxymandelaldehyde:nADP oxidoreductase                                                                | Cytosol         | DHMANAL + NADP + H2O <-> DHMAN + NADPH + H                       | Tyrosine, Tryptophan, and Phenylalanine | SPAC922.07c 1.2.1.5                                        |
| S-Adenosyl-L-methionine:catechol O-methyltransferase                                                           | Vacuole         | DHMAN + SAM -> SAH + MOHMAN                                      | Tyrosine, Tryptophan, and Phenylalanine | SPBPB21E7.04c 2.1.1.6                                      |
| S-Adenosyl-L-methionine:catechol O-methyltransferase                                                           | Vacuole         | NOADREN + SAM -> SAH + NOMNEP                                    | Tyrosine, Tryptophan, and Phenylalanine | SPBPB21E7.04c 2.1.1.6                                      |
| S-Adenosyl-L-methionine:catechol O-methyltransferase                                                           | Vacuole         | ADREN + SAM -> SAH + MNEP                                        | Tyrosine, Tryptophan, and Phenylalanine | SPBPB21E7.04c 2.1.1.6                                      |
| S-Adenosyl-L-methionine:catechol O-methyltransferase                                                           | Vacuole         | DHPEG + SAM -> SAH + MOHPEG                                      | Tyrosine, Tryptophan, and Phenylalanine | SPBPB21E7.04c 2.1.1.6                                      |
| Phenethylamine:oxygen oxidoreductase (deaminating)                                                             | Cytosol         | PEA + O2 + H2O <-> PACALD + NH4 + H2O2                           | Tyrosine, Tryptophan, and Phenylalanine | SPAC2E1P3.04 1.4.3.21                                      |
| aldehyde dehydrogenase (indole-3-acetaldehyde, NAD)                                                            | Cytosol         | H2O + id3acald + NAD -> 2 H + ind3ac + NADH                      | Tyrosine, Tryptophan, and Phenylalanine | SPAC9E9.09c 1.2.1.3                                        |
| aldehyde dehydrogenase (indole-3-acetaldehyde, NAD)                                                            | Golgi apparatus | H2O + id3acald + NAD -> 2 H + ind3ac + NADH                      | Tyrosine, Tryptophan, and Phenylalanine | SPAC9E9.09c 1.2.1.3                                        |
| aldehyde dehydrogenase (indole-3-acetaldehyde, NADP)                                                           | Golgi apparatus | H2O + id3acald + NADP -> 2 H + ind3ac + NADPH                    | Tyrosine, Tryptophan, and Phenylalanine | SPAC9E9.09c 1.2.1.3                                        |
| catalase A                                                                                                     | Mitochondria    | 2 H2O2 -> 2 H2O + O2                                             | Tyrosine, Tryptophan, and Phenylalanine | SPCC757.07c 1.11.1.6                                       |
| N-Formyl-L-kynurenine amidohydrolase                                                                           | Mitochondria    | Lfmkynr + H2O -> Lkynr + FORM + H                                | Tyrosine, Tryptophan, and Phenylalanine | SPAC6B12.04c 2.6.1.-                                       |
| catalase                                                                                                       | Nucleus         | 2 H2O2 -> 2 H2O + O2                                             | Tyrosine, Tryptophan, and Phenylalanine | SPCC757.07c 1.11.1.6                                       |
| tyrosine transaminase (nucleus)                                                                                | Nucleus         | 34Hpp + GLU -> AKG + TYR                                         | Tyrosine, Tryptophan, and Phenylalanine | SPAC10F6.13c 2.6.1.1                                       |
| tryptophan synthase (indoleglycerol phosphate)                                                                 | Nucleus         | 3iG3P + SER -> G3P + H2O + TRP                                   | Tyrosine, Tryptophan, and Phenylalanine | SPAC19A8.15 4.2.1.20                                       |
| chorismate synthase                                                                                            | Nucleus         | 3psme -> CHOR + Pi                                               | Tyrosine, Tryptophan, and Phenylalanine | SPCC1223.14 4.2.3.5<br>SPBC1773.13<br>SPBC1773.13          |
| phenylalanine transaminase                                                                                     | Nucleus         | AKG + PHE <-> GLU + pHPYR                                        | Tyrosine, Tryptophan, and Phenylalanine | SPAC56E4.03 2.6.1.57<br>SPCC569.07                         |
| tryptophan transaminase                                                                                        | Nucleus         | AKG + TRP <-> GLU + indPYR                                       | Tyrosine, Tryptophan, and Phenylalanine | SPAC56E4.03 2.6.1.57<br>SPCC569.07                         |
| anthranilate phosphoribosyltransferase                                                                         | Nucleus         | antH + PRPP -> PPi + pran                                        | Tyrosine, Tryptophan, and Phenylalanine | SPBC16G5.08 2.4.2.18                                       |
| 3-deoxy-D-arabino-heptulosonate 7-phosphate synthetase                                                         | Nucleus         | E4P + H2O + PEP -> 2dda7p + Pi                                   | Tyrosine, Tryptophan, and Phenylalanine | SPAC24H6.10c 2.5.1.54<br>SPAP8A3.07c                       |
| aldehyde dehydrogenase (indole-3-acetaldehyde, NAD)                                                            | Nucleus         | H2O + id3acald + NAD -> 2 H + ind3ac + NADH                      | Tyrosine, Tryptophan, and Phenylalanine | SPAC9E9.09c 1.2.1.3                                        |
| aldehyde dehydrogenase (indole-3-acetaldehyde, NADP)                                                           | Nucleus         | H2O + id3acald + NADP -> 2 H + ind3ac + NADPH                    | Tyrosine, Tryptophan, and Phenylalanine | SPAC9E9.09c 1.2.1.3                                        |
| N-Formyl-L-kynurenine amidohydrolase                                                                           | Nucleus         | Lfmkynr + H2O -> Lkynr + FORM + H                                | Tyrosine, Tryptophan, and Phenylalanine | SPAC6B12.04c 2.6.1.-                                       |
| 4-Hydroxyphenylpyruvate:oxygen oxidoreductase                                                                  | Cytosol         | 34Hpp + O2 -> CO2 + Hgentis                                      | Tyrosine, Tryptophan, and Phenylalanine | Metabolism                                                 |
| aldehyde dehydrogenase (phenylacetaldenide, NAD)                                                               | Cytosol         | H2O + NAD + PACALD -> 2 H + NADH + pac                           | Tyrosine, Tryptophan, and Phenylalanine | SPAC922.07c 1.2.1.5                                        |

|                                                               |              |                                                            |                                                                       |          |
|---------------------------------------------------------------|--------------|------------------------------------------------------------|-----------------------------------------------------------------------|----------|
| aldehyde dehydrogenase (indole-3-acetaldehyde, NAD)           | Mitochondria | $H_2O + id3acald + NAD \rightarrow 2 H + ind3ac + NADH$    | Tyrosine, Tryptophan, and Phenylalanine SPAC9E9.09c                   | 1.2.1.3  |
| aldehyde dehydrogenase (indole-3-acetaldehyde, NADP)          | Cytosol      | $H_2O + id3acald + NADP \rightarrow 2 H + ind3ac + NADPH$  | Tyrosine, Tryptophan, and Phenylalanine SPAC9E9.09c                   | 1.2.1.3  |
| aldehyde dehydrogenase (indole-3-acetaldehyde, NADP)          | Mitochondria | $H_2O + id3acald + NADP \rightarrow 2 H + ind3ac + NADPH$  | Tyrosine, Tryptophan, and Phenylalanine SPAC9E9.09c                   | 1.2.1.3  |
| amidase                                                       | Cytosol      | $H_2O + pad \rightarrow NH_4 + pac$                        | Tyrosine, Tryptophan, and Phenylalanine SPBPB8B6.03                   | 3.5.1.4  |
| amidase                                                       | Cytosol      | $H_2O + iad \rightarrow ind3ac + NH_4$                     | Tyrosine, Tryptophan, and Phenylalanine SPBPB8B6.03                   | 3.5.1.4  |
| anthranilate phosphoribosyltransferase                        | Cytosol      | $antH + PRPP \rightarrow PPi + pran$                       | Tyrosine, Tryptophan, and Phenylalanine SPBC16G5.08                   | 2.4.2.18 |
| catalase                                                      | Cytosol      | $2 H_2O_2 \rightarrow 2 H_2O + O_2$                        | Tyrosine, Tryptophan, and Phenylalanine SPCC757.07c                   | 1.11.1.6 |
| catalase A                                                    | Peroxisome   | $2 H_2O_2 \rightarrow 2 H_2O + O_2$                        | Tyrosine, Tryptophan, and Phenylalanine SPCC757.07c                   | 1.11.1.6 |
| chorismate mutase                                             | Cytosol      | $CHOR \rightarrow PPHN$                                    | Tyrosine, Tryptophan, and Phenylalanine SPAC16E8.04c                  | 2.6.1.-  |
| chorismate mutase                                             | Nucleus      | $CHOR \rightarrow PPHN$                                    | Tyrosine, Tryptophan, and Phenylalanine SPAC16E8.04c                  | 2.6.1.-  |
| chorismate synthase                                           | Cytosol      | $3psme \rightarrow CHOR + Pi$                              | Tyrosine, Tryptophan, and Phenylalanine SPCC1223.14                   | 4.2.3.5  |
| 3-deoxy-D-arabino-heptulosonate 7-phosphate synthetase        | Cytosol      | $E4P + H_2O + PEP \rightarrow 2dda7p + Pi$                 | Tyrosine, Tryptophan, and Phenylalanine SPAC24H6.10c<br>SPAP8A3.07c   | 2.5.1.54 |
| 2-deoxy-D-arabino-heptulosonate 7-phosphate synthetase        | Mitochondria | $E4P + H_2O + PEP \rightarrow 2dda7p + Pi$                 | Tyrosine, Tryptophan, and Phenylalanine SPAC24H6.10c<br>SPAP8A3.07c   | 2.5.1.54 |
| 3-dehydroquininate synthase                                   | Cytosol      | $2dda7p \rightarrow 3dHQ + Pi$                             | Tyrosine, Tryptophan, and Phenylalanine SPAC1834.02                   | 4.2.3.4  |
| 3-dehydroquininate dehydratase                                | Cytosol      | $3dHQ \rightarrow 3dHsk + H_2O$                            | Tyrosine, Tryptophan, and Phenylalanine SPAC1834.02                   | 4.2.1.10 |
| diamine transaminase                                          | Cytosol      | $ACCoA + sprm \rightarrow N1sprm + CoA + H$                | Tyrosine, Tryptophan, and Phenylalanine Metabolism                    |          |
| N-Formyl-L-tryptophan amidohydrolase                          | Cytosol      | $Lfmkynr + H_2O \rightarrow Lkynr + FORM + H$              | Tyrosine, Tryptophan, and Phenylalanine SPAC6B12.04c                  | 2.6.1.-  |
| fumarylacetoacetase                                           | Cytosol      | $4FUMacac + H_2O \rightarrow acac + FUM + H$               | Tyrosine, Tryptophan, and Phenylalanine Metabolism                    | 3.7.1.2  |
| Homogentisate: oxygen 1,2-oxidoreductase (deacylizing)        | Cytosol      | $Hgentis + O_2 \rightarrow 4mlacac + H$                    | Tyrosine, Tryptophan, and Phenylalanine Metabolism                    |          |
| indole-3-glycerol-phosphate synthase                          | Cytosol      | $2cpR5P + H \rightarrow 3iG3P + CO_2 + H_2O$               | Tyrosine, Tryptophan, and Phenylalanine SPBC1539.09c                  | 4.1.1.48 |
| maleylacetoacetate isomerase                                  | Cytosol      | $4mlacac \rightarrow 4FUMacac$                             | Tyrosine, Tryptophan, and Phenylalanine Metabolism<br>SPBC1773.13     | 5.2.1.2  |
| phenylalanine transaminase                                    | Cytosol      | $AKG + PHE \leftrightarrow GLU + pHPYR$                    | Tyrosine, Tryptophan, and Phenylalanine SPAC56E4.03<br>SPCC569.07     | 2.6.1.57 |
| prephenate dehydrogenase                                      | Cytosol      | $NAD + PPHN \rightarrow 34Hpp + CO_2 + NADH$               | Tyrosine, Tryptophan, and Phenylalanine SPCC1494.04c                  |          |
| prephenate dehydrogenase (NADP)                               | Cytosol      | $NADP + PPHN \rightarrow 34Hpp + CO_2 + NADPH$             | Tyrosine, Tryptophan, and Phenylalanine SPCC1494.04c                  | 1.3.1.13 |
| prephenate dehydratase                                        | Cytosol      | $H + PPHN \rightarrow CO_2 + H_2O + pHPYR$                 | Tyrosine, Tryptophan, and Phenylalanine SPBC30D10.16                  | 4.2.1.51 |
| prephenate dehydratase                                        | Nucleus      | $H + PPHN \rightarrow CO_2 + H_2O + pHPYR$                 | Tyrosine, Tryptophan, and Phenylalanine SPBC30D10.16                  | 4.2.1.51 |
| phosphoribosylanthranilate isomerase                          | Cytosol      | $pran \rightarrow 2cpR5P$                                  | Tyrosine, Tryptophan, and Phenylalanine SPBC1539.09c                  | 5.3.1.24 |
| 3-phosphoshikimate 1-carboxyvinyltransferase                  | Cytosol      | $PEP + skm5p \rightarrow 3psme + Pi$                       | Tyrosine, Tryptophan, and Phenylalanine SPAC1834.02                   | 2.5.1.19 |
| shikimate dehydrogenase                                       | Cytosol      | $3dHsk + H + NADPH \rightarrow NADP + skm$                 | Tyrosine, Tryptophan, and Phenylalanine SPAC1834.02                   | 1.1.1.25 |
| shikimate kinase                                              | Cytosol      | $ATP + skm \rightarrow ADP + H + skm5p$                    | Tyrosine, Tryptophan, and Phenylalanine SPAC1834.02                   | 2.7.1.71 |
| Spemidine acetyltransferase                                   | Cytosol      | $ACCoA + spmd \rightarrow N1aspmid + CoA + H$              | Tyrosine, Tryptophan, and Phenylalanine Metabolism                    |          |
| tryptophan synthase (indoleglycerol phosphate)                | Cytosol      | $3iG3P + SER \rightarrow G3P + H_2O + TRP$                 | Tyrosine, Tryptophan, and Phenylalanine SPAC19A8.15                   | 4.2.1.20 |
| tryptophan transaminase                                       | Cytosol      | $AKG + TRP \leftrightarrow GLU + indPYR$                   | Tyrosine, Tryptophan, and Phenylalanine SPAC56E4.03<br>SPCC569.07     | 2.6.1.57 |
| L-tyrosine N-formyltransferase                                | Cytosol      | $10FTHF + TYR \rightarrow Nfortyr + H + THF$               | Tyrosine, Tryptophan, and Phenylalanine Metabolism                    |          |
| tyrosine transaminase                                         | Cytosol      | $34Hpp + GLU \rightarrow AKG + TYR$                        | Tyrosine, Tryptophan, and Phenylalanine SPAC10F6.13c                  | 2.6.1.1  |
| tyrosine transaminase (mitochondrial)                         | Mitochondria | $34Hpp + GLU \rightarrow AKG + TYR$                        | Tyrosine, Tryptophan, and Phenylalanine SPAC10F6.13c                  | 2.6.1.1  |
| 2-oxo-4-methyl-3-carboxypentanoate decarboxylation            | Nucleus      | $3c4MOP + H \rightarrow 4MOP + CO_2$                       | Valine, Leucine, and Isoleucine Metabolism SPBC428.02c                | 2.6.1.42 |
| isoleucine transaminase                                       | Nucleus      | $AKG + ILE \leftrightarrow 3MOP + GLU$                     | Valine, Leucine, and Isoleucine Metabolism SPBC428.02c                | 2.6.1.42 |
| leucine transaminase                                          | Nucleus      | $AKG + LEU \leftrightarrow 4MOP + GLU$                     | Valine, Leucine, and Isoleucine Metabolism SPBC428.02c                | 2.6.1.42 |
| valine transaminase                                           | Nucleus      | $AKG + VAL \leftrightarrow 3MOP + GLU$                     | Valine, Leucine, and Isoleucine Metabolism SPBC428.02c                | 2.6.1.42 |
| 2-aceto-2-hydroxybutanoate synthase                           | Cytosol      | $2obut + H + PYR \rightarrow 2aHbut + CO_2$                | Valine, Leucine, and Isoleucine Metabolism SPBP35G2.07<br>SPBC14C8.04 | 2.2.1.6  |
| 2-aceto-2-hydroxybutanoate synthase                           | Mitochondria | $2obut + H + PYR \rightarrow 2aHbut + CO_2$                | Valine, Leucine, and Isoleucine Metabolism SPBP35G2.07<br>SPBC14C8.04 | 2.2.1.6  |
| acetolactate synthase                                         | Cytosol      | $H + 2 PYR \rightarrow alac-S + CO_2$                      | Valine, Leucine, and Isoleucine Metabolism SPBP35G2.07<br>SPBC14C8.04 | 2.2.1.6  |
| acetolactate synthase                                         | Mitochondria | $H + 2 PYR \rightarrow alac-S + CO_2$                      | Valine, Leucine, and Isoleucine Metabolism SPBP35G2.07<br>SPBC14C8.04 | 2.2.1.6  |
| dihydroxy-acid dehydratase (2,3-dihydroxy-3-methylbutanoate)  | Mitochondria | $23dHmb \rightarrow 3MOB + H_2O$                           | Valine, Leucine, and Isoleucine Metabolism SPAC17G8.06c               | 4.2.1.9  |
| dihydroxy-acid dehydratase (2,3-dihydroxy-3-methylpentanoate) | Mitochondria | $23dHmp \rightarrow 3MOP + H_2O$                           | Valine, Leucine, and Isoleucine Metabolism SPAC17G8.06c               | 4.2.1.9  |
| isoleucine transaminase                                       | Cytosol      | $AKG + ILE \leftrightarrow 3MOP + GLU$                     | Valine, Leucine, and Isoleucine Metabolism SPBC428.02c                | 2.6.1.42 |
| isoleucine transaminase                                       | Mitochondria | $AKG + ILE \leftrightarrow 3MOP + GLU$                     | Valine, Leucine, and Isoleucine Metabolism SPBC428.02c                | 2.6.1.42 |
| 3-isopropylmalate dehydrogenase                               | Cytosol      | $3c2Hmp + NAD \rightarrow 3c4MOP + H + NADH$               | Valine, Leucine, and Isoleucine Metabolism SPBC14A4.02c               | 1.1.1.85 |
| 3-isopropylmalate dehydratase                                 | Cytosol      | $3c2Hmp \leftrightarrow 2ippm + H_2O$                      | Valine, Leucine, and Isoleucine Metabolism SPAC9E9.03                 | 4.2.1.33 |
| 2-isopropylmalate hydratase                                   | Cytosol      | $2ippm + H_2O \leftrightarrow 3c3Hmp$                      | Valine, Leucine, and Isoleucine Metabolism SPAC9E9.03                 | 4.2.1.33 |
| acetohydroxy acid isomeroreductase                            | Mitochondria | $alac-S + H + NADPH \rightarrow 23dHmb + NADP$             | Valine, Leucine, and Isoleucine Metabolism SPBC56F2.12                | 1.1.1.86 |
| ketol-acid reductoisomerase (2-Aceto-2-hydroxybutanoate)      | Mitochondria | $2aHbut + H + NADPH \rightarrow 23dHmp + NADP$             | Valine, Leucine, and Isoleucine Metabolism SPBC56F2.12                | 1.1.1.86 |
| leucine transaminase                                          | Cytosol      | $AKG + LEU \leftrightarrow 4MOP + GLU$                     | Valine, Leucine, and Isoleucine Metabolism SPBC428.02c                | 2.6.1.42 |
| leucine transaminase                                          | Mitochondria | $AKG + LEU \leftrightarrow 4MOP + GLU$                     | Valine, Leucine, and Isoleucine Metabolism SPBC428.02c                | 2.6.1.42 |
| 2-Oxo-4-methyl-3-carboxypentanoate decarboxylation            | Cytosol      | $3c4MOP + H \rightarrow 4MOP + CO_2$                       | Valine, Leucine, and Isoleucine Metabolism SPBC428.02c                | 2.6.1.42 |
| 2-oxo-4-methyl-3-carboxypentanoate decarboxylation            | Mitochondria | $3c4MOP + H \rightarrow 4MOP + CO_2$                       | Valine, Leucine, and Isoleucine Metabolism SPBC428.02c                | 2.6.1.42 |
| valine transaminase                                           | Cytosol      | $AKG + VAL \leftrightarrow 3MOP + GLU$                     | Valine, Leucine, and Isoleucine Metabolism SPBC428.02c                | 2.6.1.42 |
| valine transaminasediral                                      | Mitochondria | $AKG + VAL \leftrightarrow 3MOP + GLU$                     | Valine, Leucine, and Isoleucine Metabolism SPBC428.02c                | 2.6.1.42 |
| xylulokinase                                                  | Nucleus      | $ATP + xylu-D \rightarrow ADP + H + xu5p-D$                | Xylose Metabolism SPCCPJ732.02c                                       | 2.7.1.17 |
| xylulokinase                                                  | Cytosol      | $ATP + xylu-D \rightarrow ADP + H + xu5p-D$                | Xylose Metabolism SPCCPJ732.02c                                       | 2.7.1.17 |
| primary-amine oxidase                                         | Cytosol      | $13dAMPp + O_2 + H_2O \rightarrow aproa + NH_4 + H_2O_2$   | SPAC2E1P3.04                                                          | 1.4.3.21 |
| Hydrogen-sulfide:ferredoxin oxidoreductase                    | Cytosol      | $selt + 6 ferrR + 8 H \rightarrow seld + 6 ferrO + 3 H_2O$ | SPAC10F6.01c                                                          | 1.8.7.1  |
| phosphatidylinositol-3,4,5-trisphosphate 3-phosphatase        | Cytosol      | $ptd345tp + H_2O \leftrightarrow ptd145bp + Pi$            | SPBC609.02                                                            | 3.1.3.67 |
| phosphatidylinositol-3,4,5-trisphosphate 3-phosphatase        | Mitochondria | $ptd345tp + H_2O \leftrightarrow ptd145bp + Pi$            | SPBC609.02                                                            | 3.1.3.67 |
|                                                               | Cytosol      | $CHOR + GLN \rightarrow ADCHO + GLU$                       |                                                                       |          |
|                                                               | Cytosol      | $DHF + NAD \rightarrow FOL + NADH + H$                     |                                                                       |          |
|                                                               | Cytosol      | $FOL + 2 NADH + 2 H \rightarrow THF + 2 NAD$               |                                                                       |          |

**Supporting Information 1B: List of metabolites used in SpoMBEL1693**

| <b>ABBREVIATION</b> | <b>METABOLITE NAME</b>                 | <b>COMPARTMENT</b> |
|---------------------|----------------------------------------|--------------------|
| 13BDgln             | 1,3-beta-D-Glucan                      | Extracellular      |
| 2hb                 | 2-Hydroxybutyrate                      | Extracellular      |
| 2mbac               | 2-methylbutyl acetate                  | Extracellular      |
| 2mbald              | 2-methylbutyraldehyde                  | Extracellular      |
| 2mbtoh              | 2-methyl-1-butanol                     | Extracellular      |
| 2mppal              | 2-methylpropanal                       | Extracellular      |
| 2phetoh             | 2-phenylethanol                        | Extracellular      |
| 3c3hmp              | 3-Carboxy-3-hydroxy-4-methylpentanoate | Extracellular      |
| 3mbald              | 3-Methylbutanal                        | Extracellular      |
| 3mop                | (S)-3-Methyl-2-oxopentanoate           | Extracellular      |
| 4abut               | 4-Aminobutanoate                       | Extracellular      |
| PABA                | 4-Aminobenzoate                        | Extracellular      |
| 5aop                | 5-Amino-4-oxopentanoate                | Extracellular      |
| 8aonn               | 8-Amino-7-oxononanoate                 | Extracellular      |
| abt                 | L-Arabinitol                           | Extracellular      |
| ac                  | Acetate                                | Extracellular      |
| ACAL                | Acetaldehyde                           | Extracellular      |
| aces                | Acetic ester                           | Extracellular      |
| ade                 | Adenine                                | Extracellular      |
| adn                 | Adenosine                              | Extracellular      |
| akg                 | 2-Oxoglutarate                         | Extracellular      |
| ALA                 | L-Alanine                              | Extracellular      |
| alltn               | Allantoin                              | Extracellular      |
| alltt               | Allantoate                             | Extracellular      |
| SAM                 | S-Adenosyl-L-methionine                | Extracellular      |
| arab                | D-Arabinose                            | Extracellular      |
| arab                | L-Arabinose                            | Extracellular      |
| ARG                 | L-Arginine                             | Extracellular      |
| ASN                 | L-Asparagine                           | Extracellular      |
| ASP                 | L-Aspartate                            | Extracellular      |
| btd-RR              | (R,R)-2,3-Butanediol                   | Extracellular      |
| btn                 | Biotin                                 | Extracellular      |
| chol                | Choline                                | Extracellular      |
| cit                 | Citrate                                | Extracellular      |
| CO2                 | CO2                                    | Extracellular      |
| csn                 | Cytosine                               | Extracellular      |
| CYS                 | L-Cysteine                             | Extracellular      |
| cytd                | Cytidine                               | Extracellular      |
| dad-2               | Deoxyadenosine                         | Extracellular      |
| dann                | 7,8-Diaminononanoate                   | Extracellular      |
| C100                | Decanoate (n-C10:0)                    | Extracellular      |
| dcyt                | Deoxycytidine                          | Extracellular      |
| C120                | Dodecanoate (n-C12:0)                  | Extracellular      |
| dgsn                | Deoxyguanosine                         | Extracellular      |
| din                 | Deoxyinosine                           | Extracellular      |
| dttp                | dTTP                                   | Extracellular      |
| duri                | Deoxyuridine                           | Extracellular      |
| epist               | episterol                              | Extracellular      |
| epistest            | episterol ester                        | Extracellular      |
| ergst               | Ergosterol                             | Extracellular      |
| ergstest            | ergosterol ester                       | Extracellular      |
| etha                | Ethanolamine                           | Extracellular      |
| etoh                | Ethanol                                | Extracellular      |



|           |                                             |               |
|-----------|---------------------------------------------|---------------|
| fe2       | Fe2+                                        | Extracellular |
| fecost    | fecosterol                                  | Extracellular |
| fecostest | fecosterol ester                            | Extracellular |
| fmn       | FMN                                         | Extracellular |
| FORM      | FORM ate                                    | Extracellular |
| fru       | D-Fructose                                  | Extracellular |
| fum       | Fumarate                                    | Extracellular |
| g3pc      | sn-Glycero-3-phosphocholine                 | Extracellular |
| g3pi      | sn-Glycero-3-phospho-1-inositol             | Extracellular |
| gal       | D-Galactose                                 | Extracellular |
| galur     | D-Galacturonate                             | Extracellular |
| gam6p     | D-Glucosamine 6-phosphate                   | Extracellular |
| gcald     | Glycolaldehyde                              | Extracellular |
| GLC       | D-Glucose                                   | Extracellular |
| GLN       | L-Glutamine                                 | Extracellular |
| GLU       | L-Glutamate                                 | Extracellular |
| glx       | Glyoxylate                                  | Extracellular |
| GLY       | Glycine                                     | Extracellular |
| glyc      | Glycerol                                    | Extracellular |
| gsn       | Guanosine                                   | Extracellular |
| gthox     | Oxidized glutathione                        | Extracellular |
| gthrd     | Reduced glutathione                         | Extracellular |
| gua       | Guanine                                     | Extracellular |
| h         | H+                                          | Extracellular |
| H2O       | H2O                                         | Extracellular |
| hdca      | Hexadecanoate (n-C16:0)                     | Extracellular |
| hdcea     | Hexadecenoate (n-C16:1)                     | Extracellular |
| hexc      | hexacosanoate (n-C26:0)                     | Extracellular |
| HIS       | L-Histidine                                 | Extracellular |
| hxan      | Hypoxanthine                                | Extracellular |
| iamac     | isoamyl acetate                             | Extracellular |
| iamoh     | Isoamyl alcohol                             | Extracellular |
| ibutac    | isobutyl acetate                            | Extracellular |
| ibutoh    | isobutyl alcohol                            | Extracellular |
| id3acald  | Indole-3-acetaldehyde                       | Extracellular |
| ILE       | L-Isoleucine                                | Extracellular |
| ind3eth   | Indole-3-ethanol                            | Extracellular |
| inost     | myo-Inositol                                | Extracellular |
| ins       | Inosine                                     | Extracellular |
| k         | potassium                                   | Extracellular |
| dLAC      | D-Lactate                                   | Extracellular |
| LAC       | L-Lactate                                   | Extracellular |
| lanost    | Lanosterol                                  | Extracellular |
| lanostest | lanosterol ester                            | Extracellular |
| LEU       | L-Leucine                                   | Extracellular |
| LYS       | L-Lysine                                    | Extracellular |
| MAL       | L-Malate                                    | Extracellular |
| MALt      | Maltose                                     | Extracellular |
| man       | D-Mannose                                   | Extracellular |
| melib     | Melibiose                                   | Extracellular |
| MET       | L-Methionine                                | Extracellular |
| mmet      | S-Methyl-L-methionine                       | Extracellular |
| na1       | Sodium                                      | Extracellular |
| nac       | Nicotinate                                  | Extracellular |
| NADP      | Nicotinamide adenine dinucleotide phosphate | Extracellular |

|          |                              |               |
|----------|------------------------------|---------------|
| Nbfortyr | N,N-bisFORM yl-dityrosine    | Extracellular |
| nh4      | Ammonium                     | Extracellular |
| nmn      | NMN                          | Extracellular |
| o2       | O2                           | Extracellular |
| oaa      | Oxaloacetate                 | Extracellular |
| ocdca    | octadecanoate (n-C18:0)      | Extracellular |
| ocdcea   | octadecenoate (n-C18:1)      | Extracellular |
| ocdcya   | octadecadienoate (n-C18:2)   | Extracellular |
| orn      | Ornithine                    | Extracellular |
| pacald   | Phenylacetaldehyde           | Extracellular |
| pap      | Adenosine 3',5'-bisphosphate | Extracellular |
| pc       | Phosphatidylcholine          | Extracellular |
| pectin   | Pectin                       | Extracellular |
| PEPd     | PEPtide                      | Extracellular |
| pheac    | Phenethyl acetate            | Extracellular |
| PHE      | L-Phenylalanine              | Extracellular |
| Pi       | Phosphate                    | Extracellular |
| pnto-R   | (R)-Pantothenate             | Extracellular |
| PRO      | L-Proline                    | Extracellular |
| ptd lino | phosphatidyl-1D-myo-inositol | Extracellular |
| ptrc     | Putrescine                   | Extracellular |
| PYR      | Pyruvate                     | Extracellular |
| rib      | D-Ribose                     | Extracellular |
| ribflv   | Riboflavin                   | Extracellular |
| sbt      | Dorbitol                     | Extracellular |
| sbt      | Lorbitol                     | Extracellular |
| SER      | Lerine                       | Extracellular |
| SO3      | Sulfite                      | Extracellular |
| SO4      | Sulfate                      | Extracellular |
| spmd     | Spermidine                   | Extracellular |
| sprm     | Spermine                     | Extracellular |
| srb      | Lorbose                      | Extracellular |
| succ     | Succinate                    | Extracellular |
| sucr     | Sucrose                      | Extracellular |
| taur     | Taurine                      | Extracellular |
| thm      | Thiamin                      | Extracellular |
| thmmp    | Thiamin monophosphate        | Extracellular |
| thmpp    | Thiamine diphosphate         | Extracellular |
| THR      | L-Threonine                  | Extracellular |
| thym     | Thymine                      | Extracellular |
| thymd    | Thymidine                    | Extracellular |
| tre      | Trehalose                    | Extracellular |
| TRP      | L-Tryptophan                 | Extracellular |
| ttdca    | tetradecanoate (n-C14:0)     | Extracellular |
| TYR      | L-Tyrosine                   | Extracellular |
| ura      | Uracil                       | Extracellular |
| urea     | Urea                         | Extracellular |
| uri      | Uridine                      | Extracellular |
| VAL      | L-Valine                     | Extracellular |
| xan      | Xanthine                     | Extracellular |
| xtsn     | Xanthosine                   | Extracellular |
| xyl      | D-Xylose                     | Extracellular |
| xylt     | Xylitol                      | Extracellular |
| zymst    | zymosterol                   | Extracellular |
| zymstest | zymosterol ester             | Extracellular |

|         |                                                                         |                       |
|---------|-------------------------------------------------------------------------|-----------------------|
| GALI    | Galactinol, 1-alpha-D-Galactosyl-myo-inositol                           | Extracellular         |
| 10fthf  | 10-FORM yltetrahydrofolate                                              | Cytosol               |
| 10fthf  | 10-FORM yltetrahydrofolate                                              | Mitochondria          |
| 12dgr   | 1,2-Diacylglycerol                                                      | Cytosol               |
| 13BDgln | 1,3-beta-D-Glucan                                                       | Cytosol               |
| 13dampp | 1,3-Diaminopropane                                                      | Cytosol               |
| 13dpg   | 3-Phospho-D-glyceroyl phosphate                                         | Cytosol               |
| 14glun  | (1,4-alpha-D-Glucosyl)n                                                 | Cytosol               |
| 16BDgln | 1,6-beta-D-Glucan                                                       | Cytosol               |
| 1ag3p   | 1-Acyln-glycerol 3-phosphate                                            | Cytosol               |
| 1agly3p | 1-Acyl-glycerone 3-phosphate                                            | Cytosol               |
| 1agpc   | 1-Acyln-glycerol-3-phosphocholine                                       | Cytosol               |
| GALI    | Galactinol, 1-alpha-D-Galactosyl-myo-inositol                           | Endoplasmic Reticulum |
| 1mncam  | 1-Methylnicotinamide                                                    | Cytosol               |
| 1p3h5c  | L-1-Pyrroline-3-hydroxy-5-carboxylate                                   | Cytosol               |
| 1p3h5c  | L-1-Pyrroline-3-hydroxy-5-carboxylate                                   | Mitochondria          |
| 1pyr5c  | 1-Pyrroline-5-carboxylate                                               | Cytosol               |
| 1pyr5c  | 1-Pyrroline-5-carboxylate                                               | Mitochondria          |
| 23camp  | 2',3'-Cyclic AMP                                                        | Cytosol               |
| 23dhmb  | (R)-2,3-Dihydroxy-3-methylbutanoate                                     | Mitochondria          |
| 23dhmp  | (R)-2,3-Dihydroxy-3-methylpentanoate                                    | Mitochondria          |
| 23dpg   | 2,3-Disphospho-D-glycerate                                              | Cytosol               |
| saicar  | (S)-2-[5-Amino-1-(5-phospho-D-ribosyl)imidazole-4-carboxamido]succinate | Cytosol               |
| 25dhpp  | 2,5-Diamino-6-hydroxy-4-(5'-phosphoribosylamino)-pyrimidine             | Cytosol               |
| 25dthpp | 2,5-diamino-6-ribitylamino-4(3H)-pyrimidinone 5'-phosphate              | Cytosol               |
| 2ahbut  | (S)-2-Aceto-2-hydroxybutanoate                                          | Mitochondria          |
| 2ahhmd  | 2-Amino-4-hydroxy-6-hydroxymethyl-7,8-dihydropteridine diphosphate      | Mitochondria          |
| 2ahhmp  | 2-Amino-4-hydroxy-6-hydroxymethyl-7,8-dihydropteridine                  | Mitochondria          |
| 2amsa   | 2-Aminomalonate semialdehyde                                            | Cytosol               |
| 2aobut  | L-2-Amino-3-oxobutanoate                                                | Cytosol               |
| 2cpr5p  | 1-(2-Carboxyphenylamino)-1-deoxy-D-ribose 5-phosphate                   | Cytosol               |
| 2dda7p  | 2-Dehydro-3-deoxy-D-arabino-heptonate 7-phosphate                       | Cytosol               |
| 2dda7p  | 2-Dehydro-3-deoxy-D-arabino-heptonate 7-phosphate                       | Mitochondria          |
| 2dglc   | 2-Deoxy-D-glucose                                                       | Cytosol               |
| 2dhp    | 2-Dehydropantoate                                                       | Cytosol               |
| 2dhp    | 2-Dehydropantoate                                                       | Mitochondria          |
| 2doxG6P | 2-Deoxy-D-glucose 6-phosphate                                           | Cytosol               |
| 2dr1p   | 2-Deoxy-D-ribose 1-phosphate                                            | Cytosol               |
| 2dr5p   | 2-Deoxy-D-ribose 5-phosphate                                            | Cytosol               |
| 2hb     | 2-Hydroxybutyrate                                                       | Cytosol               |
| 2hhxdal | 2-Hydroxy-hexadecanal                                                   | Cytosol               |
| 2OPMB   | 2-Hexaprenyl-6-methoxy-1,4-benzoquinone                                 | Mitochondria          |
| 2OPMP   | 2-Hexaprenyl-6-methoxyphenol                                            | Mitochondria          |
| 2OMHMB  | 2-hexaprenyl-3-methyl-5-hydroxy-6-methoxy-1,4-benzoquinone              | Mitochondria          |
| 2OPMMB  | 2-hexaprenyl-3-methyl-6-methoxy-1,4-benzoquinone                        | Mitochondria          |
| 2ippm   | 2-Isopropylmaleate                                                      | Cytosol               |
| 2kmb    | 2-keto-4-methylthiobutyrate                                             | Cytosol               |
| 2mahmp  | 2-Methyl-4-amino-5-hydroxymethylpyrimidine diphosphate                  | Cytosol               |
| 2mbac   | 2-methylbutyl acetate                                                   | Cytosol               |
| 2mbald  | 2-methylbutyraldehyde                                                   | Cytosol               |
| 2mbald  | 2-methylbutyraldehyde                                                   | Mitochondria          |
| 2mbtoh  | 2-methyl-1-butanol                                                      | Cytosol               |
| 2mbtoh  | 2-methyl-1-butanol                                                      | Mitochondria          |
| 2mcit   | 2-Methylcitrate                                                         | Mitochondria          |
| 2mppal  | 2-methylpropanal                                                        | Cytosol               |

|           |                                                  |              |
|-----------|--------------------------------------------------|--------------|
| 2mppal    | 2-methylpropanal                                 | Mitochondria |
| 2obut     | 2-Oxobutanoate                                   | Cytosol      |
| 2obut     | 2-Oxobutanoate                                   | Mitochondria |
| 2oxoadp   | 2-Oxoadipate                                     | Cytosol      |
| 2oxoadp   | 2-Oxoadipate                                     | Mitochondria |
| 2pg       | D-Glycerate 2-phosphate                          | Cytosol      |
| 2phetoh   | 2-phenylethanol                                  | Cytosol      |
| 2phetoh   | 2-phenylethanol                                  | Mitochondria |
| 34hpl     | 3-(4-Hydroxyphenyl)lactate                       | Mitochondria |
| 34hpp     | 3-(4-Hydroxyphenyl)pyruvate                      | Cytosol      |
| 34hpp     | 3-(4-Hydroxyphenyl)pyruvate                      | Mitochondria |
| 34hpp     | 3-(4-Hydroxyphenyl)pyruvate                      | Peroxisome   |
| 35cCMP    | 3',5'-Cyclic CMP                                 | Cytosol      |
| 35cdamp   | 3',5'-Cyclic dAMP                                | Cytosol      |
| 35cGMP    | 3',5'-Cyclic GMP                                 | Cytosol      |
| 35cIMP    | 3',5'-Cyclic IMP                                 | Cytosol      |
| 3c2hmp    | 3-Carboxy-2-hydroxy-4-methylpentanoate           | Cytosol      |
| 3c3hmp    | 3-Carboxy-3-hydroxy-4-methylpentanoate           | Cytosol      |
| 3c3hmp    | 3-Carboxy-3-hydroxy-4-methylpentanoate           | Mitochondria |
| 3c4mop    | 3-Carboxy-4-methyl-2-oxopentanoate               | Cytosol      |
| 3c4mop    | 3-Carboxy-4-methyl-2-oxopentanoate               | Mitochondria |
| 3H45DHBZ  | 3-Hexaprenyl-4,5-dihydroxybenzoate               | Cytosol      |
| 3H45DHBZ  | 3-Hexaprenyl-4,5-dihydroxybenzoate               | Mitochondria |
| 3dhq      | 3-Dehydroquinate                                 | Cytosol      |
| 3dhsk     | 3-Dehydroshikimate                               | Cytosol      |
| 3dsphgn   | 3-Dehydrosphinganine                             | Cytosol      |
| 3hanthrn  | 3-Hydroxyanthranilate                            | Cytosol      |
| 3hdCoA    | (S)-3-Hydroxydecanoyl-CoA                        | Peroxisome   |
| 3hddCoA   | (S)-3-Hydroxydodecanoyl-CoA                      | Peroxisome   |
| 3hhdCoA   | (S)-3-Hydroxyhexadecanoyl-CoA                    | Peroxisome   |
| 3hodCoA   | (S)-3-Hydroxyoctadecanoyl-CoA                    | Peroxisome   |
| 3H4H5MOBZ | 3-Hexaprenyl-4-hydroxy-5-methoxybenzoate         | Mitochondria |
| 3htdCoA   | (S)-3-Hydroxytetradecanoyl-CoA                   | Peroxisome   |
| 3hxcCoA   | (S)-3-Hydroxyhexacosyl-CoA                       | Peroxisome   |
| 3ig3p     | C <sup>1</sup> -(3-Indolyl)-glycerol 3-phosphate | Cytosol      |
| 3ipmest   | 3-isopropylmalate-methyl-ester                   | Cytosol      |
| 3mbald    | 3-Methylbutanal                                  | Cytosol      |
| 3mbald    | 3-Methylbutanal                                  | Mitochondria |
| 3mob      | 3-Methyl-2-oxobutanoate                          | Cytosol      |
| 3mob      | 3-Methyl-2-oxobutanoate                          | Mitochondria |
| 3mop      | (S)-3-Methyl-2-oxopentanoate                     | Cytosol      |
| 3mop      | (S)-3-Methyl-2-oxopentanoate                     | Mitochondria |
| 3odCoA    | 3-Oxodecanoyl-CoA                                | Peroxisome   |
| 3oddCoA   | 3-Oxododecanoyl-CoA                              | Peroxisome   |
| 3ohdCoA   | 3-Oxohexadecanoyl-CoA                            | Peroxisome   |
| 3ohodCoA  | 3-Oxoctadecanoyl-CoA                             | Peroxisome   |
| 3ohxcCoA  | 3-Oxohexacosyl-CoA                               | Peroxisome   |
| O4HBZ     | 3-Hexaprenyl-4-hydroxybenzoate                   | Cytosol      |
| O4HBZ     | 3-Hexaprenyl-4-hydroxybenzoate                   | Mitochondria |
| 3otdCoA   | 3-Oxotetradecanoyl-CoA                           | Peroxisome   |
| 3pg       | 3-Phospho-D-glycerate                            | Cytosol      |
| 3php      | 3-Phosphohydroxypyruvate                         | Cytosol      |
| 3psme     | 5-O-(1-Carboxyvinyl)-3-phosphoshikimate          | Cytosol      |
| 44mctr    | 4,4-dimethylcholesta-8,14,24-trienol             | Cytosol      |
| 44mzym    | 4,4-dimethylzymosterol                           | Cytosol      |

|          |                                                        |                       |
|----------|--------------------------------------------------------|-----------------------|
| 4aabtn   | 4-Acetamidobutanoate                                   | Cytosol               |
| 4abut    | 4-Aminobutanoate                                       | Cytosol               |
| 4abut    | 4-Aminobutanoate                                       | Mitochondria          |
| 4abtn    | 4-Aminobutanal                                         | Cytosol               |
| 4abtn    | 4-Aminobutanal                                         | Mitochondria          |
| PABA     | 4-Aminobenzoate                                        | Cytosol               |
| PABA     | 4-Aminobenzoate                                        | Mitochondria          |
| adcho    | 4-amino-4-deoxychorismate                              | Cytosol               |
| 4ahmmp   | 4-Amino-5-hydroxymethyl-2-methylpyrimidine             | Cytosol               |
| 4ampm    | 4-Amino-2-methyl-5-phosphomethylpyrimidine             | Cytosol               |
| 4fumacac | 4-Fumarylacetoacetate                                  | Cytosol               |
| 4gudbd   | 4-Guanidinobutanamide                                  | Cytosol               |
| 4gudbutn | 4-Guanidinobutanoate                                   | Cytosol               |
| 4H2Ogl   | 4-Hydroxy-2-oxoglutarate                               | Cytosol               |
| 4H2Ogl   | 4-Hydroxy-2-oxoglutarate                               | Mitochondria          |
| 4H2Ogl   | 4-Hydroxy-2-oxoglutarate                               | Peroxisome            |
| 4hbz     | 4-Hydroxybenzoate                                      | Cytosol               |
| 4hbz     | 4-Hydroxybenzoate                                      | Mitochondria          |
| 4hbzCoA  | 4-hydroxybenoyl-CoA                                    | Mitochondria          |
| 4hglusa  | L-4-Hydroxyglutamate semialdehyde                      | Mitochondria          |
| 4hproT   | trans-4-Hydroxy-L-proline                              | Cytosol               |
| 4hproT   | trans-4-Hydroxy-L-proline                              | Mitochondria          |
| 4hthr    | 4-Hydroxy-L-threonine                                  | Cytosol               |
| 4mhetz   | 4-Methyl-5-(2-hydroxyethyl)-thiazole                   | Cytosol               |
| 4mlacac  | 4-Maleylacetoacetate                                   | Cytosol               |
| 4mop     | 4-Methyl-2-oxopentanoate                               | Cytosol               |
| 4mop     | 4-Methyl-2-oxopentanoate                               | Mitochondria          |
| 4mpetz   | 4-Methyl-5-(2-phosphoethyl)-thiazole                   | Cytosol               |
| 4mzym    | 4-methylzymosterol                                     | Cytosol               |
| 44mzymc  | 4alpha-Methylzymosterol-4-carboxylate                  | Cytosol               |
| 3k4mzym  | 4-Methylzymosterol intermediate 2                      | Cytosol               |
| 4pasp    | 4-Phospho-L-aspartate                                  | Cytosol               |
| 4ppan    | D-4'-Phosphopantothenate                               | Cytosol               |
| 4ppcys   | N-((R)-4-Phosphopantothenoyl)-L-cysteine               | Cytosol               |
| 4r5au    | 4-(1-D-Ribitylamino)-5-aminouracil                     | Cytosol               |
| cair     | 5-amino-1-(5-phospho-D-ribosyl)imidazole-4-carboxylate | Cytosol               |
| 5aop     | 5-Amino-4-oxopentanoate                                | Cytosol               |
| 5aop     | 5-Amino-4-oxopentanoate                                | Mitochondria          |
| 5aprbu   | 5-Amino-6-(5'-phosphoribitylamino)uracil               | Cytosol               |
| 5dpmev   | (R)-5-Diphosphomevalonate                              | Cytosol               |
| 5fthf    | 5-FORM yltetrahydrofolate                              | Cytosol               |
| 5fthf    | 5-FORM yltetrahydrofolate                              | Mitochondria          |
| 5mdr1p   | 5-Methylthio-5-deoxy-D-ribose 1-phosphate              | Cytosol               |
| 5mdru1p  | 5-Methylthio-5-deoxy-D-ribulose 1-phosphate            | Cytosol               |
| 5mta     | 5-Methylthioadenosine                                  | Cytosol               |
| 5mthf    | 5-Methyltetrahydrofolate                               | Cytosol               |
| 5pmev    | (R)-5-Phosphomevalonate                                | Cytosol               |
| 6dg      | D-Gal-alpha-1->6D-Glucose                              | Cytosol               |
| 6pgc     | 6-Phospho-D-gluconate                                  | Cytosol               |
| 6pgl     | 6-phospho-D-glucono-1,5-lactone                        | Cytosol               |
| 6pgl     | 6-phospho-D-glucono-1,5-lactone                        | Endoplasmic Reticulum |
| 8aonn    | 8-Amino-7-oxononanoate                                 | Cytosol               |
| aacald   | Aminoacetaldehyde                                      | Cytosol               |
| aaCoA    | Acetoacetyl-CoA                                        | Cytosol               |
| aaCoA    | Acetoacetyl-CoA                                        | Mitochondria          |

|         |                                                                                   |                 |
|---------|-----------------------------------------------------------------------------------|-----------------|
| aact    | Aminoacetone                                                                      | Cytosol         |
| abt     | L-Arabinitol                                                                      | Cytosol         |
| ac      | Acetate                                                                           | Cytosol         |
| ac      | Acetate                                                                           | Mitochondria    |
| ac      | Acetate                                                                           | Peroxisome      |
| acac    | Acetoacetate                                                                      | Cytosol         |
| acACP   | Acetyl-ACP                                                                        | Cytosol         |
| acACP   | Acetyl-ACP                                                                        | Mitochondria    |
| ACAL    | Acetaldehyde                                                                      | Cytosol         |
| ACAL    | Acetaldehyde                                                                      | Mitochondria    |
| acCoA   | Acetyl-CoA                                                                        | Cytosol         |
| acCoA   | Acetyl-CoA                                                                        | Mitochondria    |
| acCoA   | Acetyl-CoA                                                                        | Nucleus         |
| acCoA   | Acetyl-CoA                                                                        | Peroxisome      |
| aces    | Acetic ester                                                                      | Cytosol         |
| acg5p   | N-Acetyl-L-glutamyl 5-phosphate                                                   | Mitochondria    |
| acg5sa  | N-Acetyl-L-glutamate 5emialdehyde                                                 | Mitochondria    |
| acgam1p | N-Acetyl-D-glucosamine 1-phosphate                                                | Cytosol         |
| acgam6p | N-Acetyl-D-glucosamine 6-phosphate                                                | Cytosol         |
| acglu   | N-Acetyl-L-glutamate                                                              | Mitochondria    |
| achms   | O-Acetyl-L-homoserine                                                             | Cytosol         |
| acon5m  | E-3-carboxyl-2-pentenedioate 5-methyl ester                                       | Cytosol         |
| acon-T  | trans-Aconitate                                                                   | Cytosol         |
| acorn   | N2-Acetyl-L-ornithine                                                             | Mitochondria    |
| ACP     | acyl carrier protein                                                              | Cytosol         |
| ACP     | acyl carrier protein                                                              | Mitochondria    |
| ACP1C   | 1-Aminocyclopropane-1-carboxylate                                                 | Cytosol         |
| acser   | O-Acetyl-Lerine                                                                   | Cytosol         |
| actn-R  | (R)-Acetoin                                                                       | Cytosol         |
| acybut  | gamma-Amino-gamma-cyanobutanoate                                                  | Cytosol         |
| ade     | Adenine                                                                           | Cytosol         |
| ade     | Adenine                                                                           | Mitochondria    |
| adn     | Adenosine                                                                         | Cytosol         |
| adn     | Adenosine                                                                         | Mitochondria    |
| ADP     | ADP                                                                               | Cytosol         |
| ADP     | ADP                                                                               | Golgi Apparatus |
| ADP     | ADP                                                                               | Mitochondria    |
| ADP     | ADP                                                                               | Nucleus         |
| ADP     | ADP                                                                               | Vacuole         |
| ADP     | ADP                                                                               | Peroxisome      |
| adprib  | ADPribose                                                                         | Cytosol         |
| adprib  | ADPribose                                                                         | Mitochondria    |
| adren   | L-Adrenaline                                                                      | ???             |
| ahcys   | S-Adenosyl-L-homocysteine                                                         | Cytosol         |
| ahcys   | S-Adenosyl-L-homocysteine                                                         | Mitochondria    |
| ahdt    | 2-Amino-4-hydroxy-6-(erythro-1,2,3-trihydroxypropyl)dihydropteridine triphosphate | Cytosol         |
| aicar   | 5-Amino-1-(5-Phospho-D-ribosyl)imidazole-4-carboxamide                            | Cytosol         |
| air     | 5-amino-1-(5-phospho-D-ribosyl)imidazole                                          | Cytosol         |
| akg     | 2-Oxoglutarate                                                                    | Cytosol         |
| akg     | 2-Oxoglutarate                                                                    | Mitochondria    |
| akg     | 2-Oxoglutarate                                                                    | Nucleus         |
| akg     | 2-Oxoglutarate                                                                    | Peroxisome      |
| ala-B   | beta-Alanine                                                                      | Cytosol         |
| ala     | D-Alanine                                                                         | Cytosol         |

|         |                                                  |                 |
|---------|--------------------------------------------------|-----------------|
| alac    | (S)-2-Acetylactate                               | Mitochondria    |
| ALA     | L-Alanine                                        | Cytosol         |
| ALA     | L-Alanine                                        | Mitochondria    |
| alatrna | L-Alanyl-tRNA(Ala)                               | Cytosol         |
| allphn  | Allophanate                                      | Cytosol         |
| alltn   | Allantoin                                        | Cytosol         |
| alltt   | Allantoate                                       | Cytosol         |
| alpam   | S-aminomethylidihydrolipoamide                   | Mitochondria    |
| alpro   | S-Aminomethylidihydrolipoylprotein               | Mitochondria    |
| SAM     | S-Adenosyl-L-methionine                          | Cytosol         |
| SAM     | S-Adenosyl-L-methionine                          | Mitochondria    |
| ametam  | S-Adenosylmethioninamine                         | Cytosol         |
| amob    | S-Adenosyl-4-methylthio-2-oxobutanoate           | Cytosol         |
| AMP     | AMP                                              | Cytosol         |
| AMP     | AMP                                              | Mitochondria    |
| AMP     | AMP                                              | Nucleus         |
| AMP     | AMP                                              | Peroxisome      |
| amp2p   | Adenosine 2'-phosphate                           | Cytosol         |
| anth    | Anthranilate                                     | Cytosol         |
| ap4a    | P1,P4-Bis(5'-adenosyl) tetraphosphate            | Cytosol         |
| ap4g    | P1-(5'-adenosyl),P4-(5'-guanosyl) tetraphosphate | Cytosol         |
| aPEP    | Nalpha-AcetylPEptide                             | Cytosol         |
| aproa   | 3-Aminopropanal                                  | Cytosol         |
| aprop   | alpha-Aminopropionitrile                         | Cytosol         |
| aprut   | N-Acetylputrescine                               | Cytosol         |
| aps     | Adenosine 5'-phosphosulfate                      | Cytosol         |
| arab    | D-Arabinose                                      | Cytosol         |
| arab    | L-Arabinose                                      | Cytosol         |
| ARG     | L-Arginine                                       | Cytosol         |
| ARG     | L-Arginine                                       | Mitochondria    |
| ARG     | L-Arginine                                       | Vacuole         |
| argsuc  | N(omega)-(L-Arginino)succinate                   | Cytosol         |
| argtrna | L-Arginyl-tRNA(Arg)                              | Cytosol         |
| argtrna | L-Arginyl-tRNA(Arg)                              | Mitochondria    |
| ASN     | L-Asparagine                                     | Cytosol         |
| ASN     | L-Asparagine                                     | Mitochondria    |
| ASN     | L-Asparagine                                     | Vacuole         |
| asnrna  | L-Asparaginyl-tRNA(Asn)                          | Cytosol         |
| asnrna  | L-Asparaginyl-tRNA(Asn)                          | Mitochondria    |
| ASP     | L-Aspartate                                      | Cytosol         |
| ASP     | L-Aspartate                                      | Mitochondria    |
| ASP     | L-Aspartate                                      | Nucleus         |
| ASP     | L-Aspartate                                      | Vacuole         |
| ASP     | L-Aspartate                                      | Peroxisome      |
| aspsa   | L-Aspartate 4emialdehyde                         | Cytosol         |
| asptrna | L-Aspartyl-tRNA(Asp)                             | Cytosol         |
| asptrna | L-Aspartyl-tRNA(Asp)                             | Mitochondria    |
| athr    | L-Allo-threonine                                 | Cytosol         |
| ATP     | ATP                                              | Cytosol         |
| ATP     | ATP                                              | Golgi Apparatus |
| ATP     | ATP                                              | Mitochondria    |
| ATP     | ATP                                              | Nucleus         |
| ATP     | ATP                                              | Vacuole         |
| ATP     | ATP                                              | Peroxisome      |
| b124tc  | But-1-ene-1,2,4-tricarboxylate                   | Mitochondria    |

|          |                                                   |                                            |
|----------|---------------------------------------------------|--------------------------------------------|
| btamp    | Biotinyl-5'-AMP                                   | Cytosol                                    |
| btd-RR   | (R,R)-2,3-Butanediol                              | Cytosol                                    |
| btn      | Biotin                                            | Cytosol                                    |
| camp     | cAMP                                              | Cytosol                                    |
| caphis   | 2-(3-Carboxy-3-aminopropyl)-L-histidine           | Cytosol                                    |
| cbasp    | N-Carbamoyl-L-aspartate                           | Cytosol                                    |
| cbasp    | N-Carbamoyl-L-aspartate                           | Nucleus                                    |
| cbp      | Carbamoyl phosphate                               | Cytosol                                    |
| cbp      | Carbamoyl phosphate                               | Nucleus                                    |
| CDP      | CDP                                               | Cytosol                                    |
| CDP      | CDP                                               | Nucleus                                    |
| CDPchol  | CDPcholine                                        | Cytosol                                    |
| CDPdag   | CDPdiacylglycerol                                 | Cytosol                                    |
| CDPdag   | CDPdiacylglycerol                                 | Mitochondria                               |
| CDPea    | CDPethanolamine                                   | Cytosol                                    |
| cer124   | Ceramide-1 (Sphinganine:n-C24:0)                  | Cytosol, ER, Golgi apparatus, Mitochondria |
| cer126   | Ceramide-1 (Sphinganine:n-C26:0)                  | Cytosol, ER, Golgi apparatus, Mitochondria |
| cer224   | Ceramide-2 (Phytosphingosine:n-C24:0)             | Cytosol                                    |
| cer2'_24 | Ceramide-2' (Sphinganine:n-C24:0OH)               | Cytosol                                    |
| cer224   | Ceramide-2 (Phytosphingosine:n-C24:0)             | Endoplasmic Reticulum                      |
| cer226   | Ceramide-2 (Phytosphingosine:n-C26:0)             | Cytosol                                    |
| cer2'_26 | Ceramide-2' (Sphinganine:n-C26:0OH)               | Cytosol                                    |
| cer226   | Ceramide-2 (Phytosphingosine:n-C26:0)             | Endoplasmic Reticulum                      |
| cer324   | Ceramide-3 (Phytosphingosine:n-C24:0OH)           | Cytosol                                    |
| cer326   | Ceramide-3 (Phytosphingosine:n-C26:0OH)           | Cytosol                                    |
| cgly     | Cys-Gly                                           | Cytosol                                    |
| ch4s     | Methanethiol                                      | Cytosol                                    |
| chitin   | Chitin (monomer)                                  | Cytosol                                    |
| chitos   | Chitosan                                          | Cytosol                                    |
| chol     | Choline                                           | Cytosol                                    |
| cholp    | Choline phosphate                                 | Cytosol                                    |
| CHOR     | chorismate                                        | Cytosol                                    |
| cit      | Citrate                                           | Cytosol                                    |
| cit      | Citrate                                           | Mitochondria                               |
| cit      | Citrate                                           | Peroxisome                                 |
| citr     | L-Citrulline                                      | Cytosol                                    |
| clpn     | Cardiolipin                                       | Mitochondria                               |
| cmaphis  | 2-[3-Carboxy-3-(methylammonio)propyl]-L-histidine | Cytosol                                    |
| CMP      | CMP                                               | Cytosol                                    |
| CMP      | CMP                                               | Mitochondria                               |
| cmusa    | 2-Amino-3-carboxymuconate semialdehyde            | Cytosol                                    |
| CO2      | CO2                                               | Cytosol                                    |
| CO2      | CO2                                               | Golgi Apparatus                            |
| CO2      | CO2                                               | Mitochondria                               |
| CO2      | CO2                                               | Nucleus                                    |
| CO2      | CO2                                               | Vacuole                                    |
| CO2      | CO2                                               | Peroxisome                                 |
| CoA      | Coenzyme A                                        | Cytosol                                    |
| CoA      | Coenzyme A                                        | Mitochondria                               |
| CoA      | Coenzyme A                                        | Nucleus                                    |
| CoA      | Coenzyme A                                        | Endoplasmic Reticulum                      |
| CoA      | Coenzyme A                                        | Peroxisome                                 |
| couCoA   | p-coumaroyl-CoA                                   | Mitochondria                               |
| cpppg3   | Coproporphyrinogen III                            | Cytosol                                    |



|           |                                      |              |
|-----------|--------------------------------------|--------------|
| csn       | Cytosine                             | Cytosol      |
| CTP       | CTP                                  | Cytosol      |
| CTP       | CTP                                  | Mitochondria |
| CYS       | L-Cysteine                           | Cytosol      |
| cyst      | L-Cystathionine                      | Cytosol      |
| cyst      | L-Cystathionine                      | Peroxisome   |
| cystrna   | L-Cysteinyl-tRNA(Cys)                | Cytosol      |
| cytd      | Cytidine                             | Cytosol      |
| dad-2     | Deoxyadenosine                       | Cytosol      |
| dadp      | dADP                                 | Cytosol      |
| dadp      | dADP                                 | Nucleus      |
| dagpy     | diacylglycerol pyrophosphate         | Cytosol      |
| damp      | dAMP                                 | Cytosol      |
| dann      | 7,8-Diaminononanoate                 | Cytosol      |
| Dara14lac | D-Arabinono-1,4-lactone              | Cytosol      |
| datp      | dATP                                 | Cytosol      |
| db4p      | 3,4-dihydroxy-2-butanone 4-phosphate | Cytosol      |
| dc2CoA    | trans-Dec-2-enoyl-CoA                | Peroxisome   |
| C100      | Decanoate (n-C10:0)                  | Cytosol      |
| C100      | Decanoate (n-C10:0)                  | Peroxisome   |
| C100ACP   | Decanoyl-ACP (n-C10:0ACP)            | Mitochondria |
| C100CoA   | Decanoyl-CoA (n-C10:0CoA)            | Cytosol      |
| C100CoA   | Decanoyl-CoA (n-C10:0CoA)            | Peroxisome   |
| dcamp     | N6-(1,2-Dicarboxyethyl)-AMP          | Cytosol      |
| dCDP      | dCDP                                 | Cytosol      |
| dCDP      | dCDP                                 | Nucleus      |
| dCMP      | dCMP                                 | Cytosol      |
| dCTP      | dCTP                                 | Cytosol      |
| dcyt      | Deoxycytidine                        | Cytosol      |
| dd2CoA    | trans-Dodec-2-enoyl-CoA              | Peroxisome   |
| C120      | Dodecanoate (n-C12:0)                | Cytosol      |
| C120      | Dodecanoate (n-C12:0)                | Peroxisome   |
| C120ACP   | Dodecanoyl-ACP (n-C12:0ACP)          | Cytosol      |
| C120ACP   | Dodecanoyl-ACP (n-C12:0ACP)          | Mitochondria |
| C120CoA   | Dodecanoyl-CoA (n-C12:0CoA)          | Cytosol      |
| C120CoA   | Dodecanoyl-CoA (n-C12:0CoA)          | Peroxisome   |
| dext      | Dextrin                              | Cytosol      |
| dGDP      | dGDP                                 | Cytosol      |
| dGDP      | dGDP                                 | Nucleus      |
| dGMP      | dGMP                                 | Cytosol      |
| dgsn      | Deoxyguanosine                       | Cytosol      |
| dGTP      | dGTP                                 | Cytosol      |
| dha       | Dihydroxyacetone                     | Cytosol      |
| dhap      | Dihydroxyacetone phosphate           | Cytosol      |
| dhap      | Dihydroxyacetone phosphate           | Mitochondria |
| dhf       | 7,8-Dihydrofolate                    | Cytosol      |
| dhf       | 7,8-Dihydrofolate                    | Mitochondria |
| dhlam     | Dihydrolipoamide                     | Mitochondria |
| dhlpro    | Dihydrolipolprotein                  | Mitochondria |
| dhman     | 3,4-Dihydroxymandelate               | ???          |
| dhmanal   | 3,4-Dihydroxymandelaldehyde          | ???          |
| dhnpt     | Dihydroneopterin                     | Cytosol      |
| dhnpt     | Dihydroneopterin                     | Mitochondria |
| dhor      | (S)-Dihydroorotate                   | Cytosol      |
| dhpac     | 3,4-Dihydroxyphenylacetate           | ???          |

|           |                                                 |                       |
|-----------|-------------------------------------------------|-----------------------|
| dhpacal   | 3,4-Dihydroxyphenylacetaldehyde                 | ???                   |
| dhpeg     | 3,4-Dihydroxyphenylethyleneglycol               | ???                   |
| dhpmp     | Dihydroneopterin monophosphate                  | Cytosol               |
| dhpt      | Dihydropteroate                                 | Cytosol               |
| dhpt      | Dihydropteroate                                 | Mitochondria          |
| din       | Deoxyinosine                                    | Cytosol               |
| dkmpp     | 2,3-diketo-5-methylthio-1-phosphopentane        | Cytosol               |
| dmlz      | 6,7-Dimethyl-8-(1-D-ribityl)lumazine            | Cytosol               |
| DMPP      | Dimethylallyl diphosphate                       | Cytosol               |
| dNAD      | Deamino-NAD+                                    | Cytosol               |
| dNAD      | Deamino-NAD+                                    | Mitochondria          |
| dNAD      | Deamino-NAD+                                    | Nucleus               |
| dolichol  | Dolichol                                        | Cytosol               |
| dolmanp   | Dolichyl phosphate D-mannose                    | Endoplasmic Reticulum |
| dolp      | Dolichol phosphate                              | Cytosol               |
| dolp      | Dolichol phosphate                              | Endoplasmic Reticulum |
| dop       | Dopamine                                        | ???                   |
| dpCoA     | Dephospho-CoA                                   | Cytosol               |
| dpCoA     | Dephospho-CoA                                   | Mitochondria          |
| drib      | Deoxyribose                                     | Cytosol               |
| dscl      | dihydrosirohydrochlorin                         | Cytosol               |
| dtbt      | Dethiobiotin                                    | Cytosol               |
| dt dp     | dTDP                                            | Cytosol               |
| dt mp     | dTMP                                            | Cytosol               |
| dt tp     | dTTP                                            | Cytosol               |
| dudp      | dUDP                                            | Cytosol               |
| dudp      | dUDP                                            | Nucleus               |
| dump      | dUMP                                            | Cytosol               |
| dump      | dUMP                                            | Nucleus               |
| duri      | Deoxyuridine                                    | Cytosol               |
| dup       | dUTP                                            | Cytosol               |
| e3s       | Estrone 3ulfate                                 | Cytosol               |
| e4hglu    | L-erythro-4-Hydroxyglutamate                    | Cytosol               |
| e4hglu    | L-erythro-4-Hydroxyglutamate                    | Mitochondria          |
| e4hglu    | L-erythro-4-Hydroxyglutamate                    | Peroxisome            |
| e4p       | D-Erythrose 4-phosphate                         | Cytosol               |
| e4p       | D-Erythrose 4-phosphate                         | Mitochondria          |
| eig3p     | D-erythro-1-(Imidazol-4-yl)glycerol 3-phosphate | Cytosol               |
| emp       | Epimelibiose                                    | Extracellular         |
| epist     | episterol                                       | Cytosol               |
| epistest  | episterol ester                                 | Cytosol               |
| epm       | Epimelibiose                                    | Cytosol               |
| ergst     | Ergosterol                                      | Cytosol               |
| ergst     | Ergosterol                                      | Endoplasmic Reticulum |
| ergst3glc | ergosterol 3-beta-D-glucoside                   | Cytosol               |
| ergstest  | ergosterol ester                                | Cytosol               |
| ergtetrol | Ergosta-5,7,22,24,(28)-tetraen-3beta-ol         | Cytosol               |
| ergtetrol | Ergosta-5,7,22,24,(28)-tetraen-3beta-ol         | Endoplasmic Reticulum |
| ergtrol   | ergosta-5,7,24(28)-trienol                      | Cytosol               |
| ertascb   | D-erythro-Ascorbate                             | Cytosol               |
| est       | Estrone                                         | Cytosol               |
| etha      | Ethanolamine                                    | Cytosol               |
| ethamp    | Ethanolamine phosphate                          | Cytosol               |
| etoh      | Ethanol                                         | Cytosol               |
| etoh      | Ethanol                                         | Mitochondria          |

|           |                                                                          |                       |
|-----------|--------------------------------------------------------------------------|-----------------------|
| f1p       | D-Fructose 1-phosphate                                                   | Cytosol               |
| f26bp     | D-Fructose 2,6-bisphosphate                                              | Cytosol               |
| f6p       | D-Fructose 6-phosphate                                                   | Cytosol               |
| FAD       | Flavin adenine dinucleotide oxidized                                     | Cytosol               |
| FAD       | Flavin adenine dinucleotide oxidized                                     | Mitochondria          |
| FADH2     | Flavin adenine dinucleotide reduced                                      | Mitochondria          |
| fald      | FORM aldehyde                                                            | Cytosol               |
| fdp       | D-Fructose 1,6-bisphosphate                                              | Cytosol               |
| fe2       | Fe <sup>2+</sup>                                                         | Cytosol               |
| fe2       | Fe <sup>2+</sup>                                                         | Mitochondria          |
| fecost    | fecosterol                                                               | Cytosol               |
| fecostest | fecosterol ester                                                         | Cytosol               |
| ferrO     | Ferredoxin - Oxidized                                                    |                       |
| ferrR     | Ferredoxin - Reduced                                                     |                       |
| fgar      | N <sup>2</sup> -FORM yl-N <sup>1</sup> -(5-phospho-D-ribosyl)glycinamide | Cytosol               |
| ficyc     | Ferricytochrome c                                                        | Mitochondria          |
| fmettrna  | N-FORM ylmethionyl-tRNA                                                  | Mitochondria          |
| fmn       | FMN                                                                      | Cytosol               |
| fmn       | FMN                                                                      | Mitochondria          |
| fmnh2     | Reduced FMN                                                              | Cytosol               |
| focyc     | Ferrocyclochrome c                                                       | Mitochondria          |
| fol       | Folate                                                                   | Cytosol               |
| FORM      | Formate                                                                  | Cytosol               |
| FORM      | Formate                                                                  | Mitochondria          |
| fgam      | 2-(FORM amido)-N <sup>1</sup> -(5-phospho-D-ribosyl)acetamidine          | Cytosol               |
| fpica     | 5-FORM amido-1-(5-phospho-D-ribosyl)imidazole-4-carboxamide              | Cytosol               |
| FRPP      | Farnesyl diphosphate                                                     | Cytosol               |
| FRPP      | Farnesyl diphosphate                                                     | Mitochondria          |
| fru       | D-Fructose                                                               | Cytosol               |
| fum       | Fumarate                                                                 | Cytosol               |
| fum       | Fumarate                                                                 | Mitochondria          |
| g1p       | D-Glucose 1-phosphate                                                    | Cytosol               |
| g3p       | Glyceraldehyde 3-phosphate                                               | Cytosol               |
| g3p       | sn-Glycero-3-phosphocholine                                              | Cytosol               |
| g3pi      | sn-Glycero-3-phospho-1-inositol                                          | Cytosol               |
| G6P       | D-Glucose 6-phosphate                                                    | Cytosol               |
| G6P       | D-Glucose 6-phosphate                                                    | Endoplasmic Reticulum |
| G6P-B     | beta-D-glucose 6-phosphate                                               | Cytosol               |
| gal       | D-Galactose                                                              | Cytosol               |
| gal1p     | alpha-D-Galactose 1-phosphate                                            | Cytosol               |
| gala      | Galactosylceramide                                                       | Cytosol               |
| galcman   | Galactomannan                                                            | Cytosol               |
| gam1p     | D-Glucosamine 1-phosphate                                                | Cytosol               |
| gam6p     | D-Glucosamine 6-phosphate                                                | Cytosol               |
| gar       | N <sup>1</sup> -(5-Phospho-D-ribosyl)glycinamide                         | Cytosol               |
| gcald     | Glycolaldehyde                                                           | Cytosol               |
| gcald     | Glycolaldehyde                                                           | Mitochondria          |
| GDP       | GDP                                                                      | Cytosol               |
| GDP       | GDP                                                                      | Golgi Apparatus       |
| GDP       | GDP                                                                      | Mitochondria          |
| GDP       | GDP                                                                      | Nucleus               |
| GDPmann   | GDP-D-mannose                                                            | Cytosol               |
| GDPmann   | GDP-D-mannose                                                            | Golgi Apparatus       |
| GGPP      | Geranylgeranyl diphosphate                                               | Cytosol               |
| ggl       | Galactosylglycerol                                                       | Extracellular         |

|          |                                                      |                                                                          |
|----------|------------------------------------------------------|--------------------------------------------------------------------------|
| GLC      | D-Glucose                                            | Cytosol, ER, Golgi apparatus, Vacuole                                    |
| GLN      | L-Glutamine                                          | Cytosol, Nucleus, Vacuole                                                |
| glIntrna | L-Glutamyl-tRNA(Gln)                                 | Cytosol                                                                  |
| glp      | GlycylPEPtide                                        | Cytosol                                                                  |
| gls      | D-Glucoside                                          | Cytosol                                                                  |
| glu5p    | L-Glutamate 5-phosphate                              | Cytosol                                                                  |
| glu5sa   | L-Glutamate 5emialdehyde                             | Cytosol, Mitochondria                                                    |
| gluala   | 5-L-Glutamyl-L-alanine                               | Cytosol                                                                  |
| glucys   | gamma-L-Glutamyl-L-cysteine                          | Cytosol, Mitochondria, Nucleus, Peroxisome, Vacuole                      |
| GLU      | L-Glutamate                                          | Cytosol, Mitochondria                                                    |
| glutrna  | L-Glutamyl-tRNA(Glu)                                 | Cytosol, Mitochondria                                                    |
| glx      | Glyoxylate                                           | Cytosol, Peroxisome                                                      |
| GLY      | Glycine                                              | Cytosol, Mitochondria                                                    |
| glyald   | D-Glyceraldehyde                                     | Cytosol                                                                  |
| glyc     | Glycerol                                             | Cytosol                                                                  |
| glyc3p   | Glycerol 3-phosphate                                 | Cytosol, Mitochondria                                                    |
| glycogen | glycogen                                             | Cytosol, ER, Golgi apparatus, Vacuole                                    |
| glytrna  | Glycyl-tRNA(Gly)                                     | Cytosol                                                                  |
| GMP      | GMP                                                  | Cytosol, Golgi apparatus                                                 |
| gp4g     | P1,P4-Bis(5'-guanosyl) tetraphosphate                | Cytosol                                                                  |
| grdp     | Geranyl diphosphate                                  | Cytosol                                                                  |
| gsn      | Guanosine                                            | Cytosol, Mitochondria                                                    |
| gthox    | Oxidized glutathione                                 | Cytosol, Mitochondria                                                    |
| gthrd    | Reduced glutathione                                  | Cytosol, Mitochondria, Vacuole                                           |
| GTP      | GTP                                                  | Cytosol, Mitochondria                                                    |
| gua      | Guanine                                              | Cytosol, Mitochondria                                                    |
| h        | H+                                                   | Cytosol, ER, Golgi apparatus, Mitochondria, Nucleus, Peroxisome, Vacuole |
| H2O      | H2O                                                  | Cytosol, Mitochondria, Nucleus, Peroxisome, Vacuole                      |
| H2O2     | Hydrogen peroxide                                    | Cytosol, Mitochondria, Nucleus, Peroxisome                               |
| H2S      | Hydrogen sulfide                                     | Cytosol                                                                  |
| hcit     | 2-Hydroxybutane-1,2,4-tricarboxylate                 | Mitochondria                                                             |
| hcit     | 2-Hydroxybutane-1,2,4-tricarboxylate                 | Nucleus                                                                  |
| HCO3     | Bicarbonate                                          | Cytosol                                                                  |
| HCO3     | Bicarbonate                                          | Mitochondria                                                             |
| HCO3     | Bicarbonate                                          | Nucleus                                                                  |
| hcys     | L-Homocysteine                                       | Cytosol                                                                  |
| hcys     | L-Homocysteine                                       | Peroxisome                                                               |
| C160     | Hexadecanoate (n-C16:0)                              | Cytosol                                                                  |
| C160     | Hexadecanoate (n-C16:0)                              | Peroxisome                                                               |
| C161     | Hexadecenoate (n-C16:1)                              | Cytosol                                                                  |
| C161     | Hexadecenoate (n-C16:1)                              | Peroxisome                                                               |
| C161CoA  | Hexadecenoyl-CoA (n-C16:1CoA)                        | Cytosol                                                                  |
| C161CoA  | Hexadecenoyl-CoA (n-C16:1CoA)                        | Peroxisome                                                               |
| hdd2CoA  | trans-Hexadec-2-enoyl-CoA                            | Peroxisome                                                               |
| C161ACP  | cis-hexadec-9-enoyl-[acyl-carrier protein] (n-C16:1) | Cytosol                                                                  |
| C161ACP  | cis-hexadec-9-enoyl-[acyl-carrier protein] (n-C16:1) | Mitochondria                                                             |
| hemeA    | Heme A                                               | Mitochondria                                                             |

|          |                                               |              |
|----------|-----------------------------------------------|--------------|
| hemeO    | Heme O                                        | Mitochondria |
| HXPP     | all-trans-Hexaprenyl diphosphate              | Cytosol      |
| HXPP     | all-trans-Hexaprenyl diphosphate              | Mitochondria |
| hgentis  | Homogentisate                                 | Cytosol      |
| hicit    | Homoisocitrate                                | Mitochondria |
| HIS      | L-Histidine                                   | Cytosol      |
| HIS      | L-Histidine                                   | Mitochondria |
| HIS      | L-Histidine                                   | Vacuole      |
| hisp     | L-Histidinol phosphate                        | Cytosol      |
| histd    | L-Histidinol                                  | Cytosol      |
| histrna  | L-Histidyl-tRNA(His)                          | Cytosol      |
| histrna  | L-Histidyl-tRNA(His)                          | Mitochondria |
| hLkynr   | 3-Hydroxy-L-kynurenine                        | Cytosol      |
| hmbil    | Hydroxymethylbilane                           | Cytosol      |
| hmgCoA   | Hydroxymethylglutaryl-CoA                     | Cytosol      |
| hmgCoA   | Hydroxymethylglutaryl-CoA                     | Mitochondria |
| hom      | L-Homoserine                                  | Cytosol      |
| hpac     | 4-Hydroxyphenylacetate                        | ???          |
| hpacal   | 4-Hydroxyphenylacetaldehyde                   | ???          |
| hpglu    | Tetrahydropteroyltri-L-glutamate              | Cytosol      |
| hvan     | Homovanillate                                 | ???          |
| hxa      | Hypoxanthine                                  | Cytosol      |
| hxc2CoA  | trans-Hexacos-2-enoyl-CoA                     | Peroxisome   |
| hxdcal   | Hexadecanal                                   | Cytosol      |
| iad      | Indole-3-acetamide                            | Cytosol      |
| iamac    | isoamyl acetate                               | Cytosol      |
| iamoh    | Isoamyl alcohol                               | Cytosol      |
| iamoh    | Isoamyl alcohol                               | Mitochondria |
| IMASP    | Iminoaspartate                                | Cytosol      |
| ibutac   | isobutyl acetate                              | Cytosol      |
| ibutoh   | isobutyl alcohol                              | Cytosol      |
| ibutoh   | isobutyl alcohol                              | Mitochondria |
| icit     | Isocitrate                                    | Cytosol      |
| icit     | Isocitrate                                    | Mitochondria |
| icit     | Isocitrate                                    | Peroxisome   |
| id3acald | Indole-3-acetaldehyde                         | Cytosol      |
| id3acald | Indole-3-acetaldehyde                         | Mitochondria |
| IDP      | IDP                                           | Cytosol      |
| IDP      | IDP                                           | Mitochondria |
| ILE      | L-Isoleucine                                  | Cytosol      |
| ILE      | L-Isoleucine                                  | Mitochondria |
| ILE      | L-Isoleucine                                  | Vacuole      |
| iletrna  | L-Isoleucyl-tRNA(Ile)                         | Cytosol      |
| iletrna  | L-Isoleucyl-tRNA(Ile)                         | Mitochondria |
| imacp    | 3-(Imidazol-4-yl)-2-oxopropyl phosphate       | Cytosol      |
| IMP      | IMP                                           | Cytosol      |
| ind3ac   | Indole-3-acetate                              | Cytosol      |
| ind3ac   | Indole-3-acetate                              | Mitochondria |
| ind3acnl | Indole-3-acetonitrile                         | Cytosol      |
| ind3eth  | Indole-3-ethanol                              | Cytosol      |
| ind3eth  | Indole-3-ethanol                              | Mitochondria |
| indpyr   | Indolepyruvate                                | Cytosol      |
| inost    | myo-Inositol                                  | Cytosol      |
| ins      | Inosine                                       | Cytosol      |
| ipc124   | Inositol phosphorylceramide, ceramide-1 (24C) | Cytosol      |

|                |                                                                          |                       |
|----------------|--------------------------------------------------------------------------|-----------------------|
| ipc126         | Inositol phosphorylceramide, ceramide-1 (26C)                            | Cytosol               |
| ipc224         | Inositol phosphorylceramide, ceramide-2 (24C)                            | Cytosol               |
| ipc226         | Inositol phosphorylceramide, ceramide-2 (26C)                            | Cytosol               |
| ipc324         | Inositol phosphorylceramide, ceramide-3 (24C)                            | Cytosol               |
| ipc326         | Inositol phosphorylceramide, ceramide-3 (26C)                            | Cytosol               |
| IPPP           | Isopentenyl diphosphate                                                  | Cytosol               |
| IPPP           | Isopentenyl diphosphate                                                  | Mitochondria          |
| itacCoA        | Itaconyl-CoA                                                             | Mitochondria          |
| itacon         | Itaconate                                                                | Mitochondria          |
| ITP            | ITP                                                                      | Cytosol, Mitochondria |
| K              | potassium                                                                | Cytosol               |
| L2aadp         | L-2-Aminoadipate                                                         | Cytosol               |
| L2aadp6sa      | L-2-Aminoadipate 6emialdehyde                                            | Cytosol               |
| dLAC           | D-Lactate                                                                | Cytosol, Mitochondria |
| LAC            | L-Lactate                                                                | Cytosol, Mitochondria |
| lald           | L-Lactaldehyde                                                           | Cytosol               |
| lanost         | Lanosterol                                                               | Cytosol               |
| lanostest      | lanosterol ester                                                         | Cytosol               |
| Lcystin        | L-Cystine                                                                | Cytosol               |
| Lcystin        | L-Cystine                                                                | Vacuole               |
| LEU            | L-Leucine                                                                | Cytosol               |
| LEU            | L-Leucine                                                                | Mitochondria          |
| LEU            | L-Leucine                                                                | Vacuole               |
| leutrna        | L-Leucyl-tRNA(Leu)                                                       | Cytosol               |
| leutrna        | L-Leucyl-tRNA(Leu)                                                       | Mitochondria          |
| Lfmkynr        | L-FORM ylkynurenine                                                      | Cytosol               |
| lgt            | (R)-Lactoylglutathione                                                   | Cytosol               |
| lgt            | (R)-Lactoylglutathione                                                   | Mitochondria          |
| Lkynr          | L-Kynurenine                                                             | Cytosol               |
| lpam           | Lipoamide                                                                | Mitochondria          |
| lpro           | Lipoylprotein                                                            | Mitochondria          |
| LYS            | L-Lysine                                                                 | Cytosol               |
| LYS            | L-Lysine                                                                 | Mitochondria          |
| LYS            | L-Lysine                                                                 | Vacuole               |
| lystrna        | L-Lysine-tRNA (Lys)                                                      | Cytosol               |
| lystrna        | L-Lysine-tRNA (Lys)                                                      | Mitochondria          |
| m1macchitppdol | alpha-D-mannosyl-beta-D-mannosyl-diacetylchitobiosyldiphosphodolichol    | Golgi Apparatus       |
| m2macchitppdol | (alpha-D-mannosyl)2-beta-D-mannosyl-diacetylchitobiosyldiphosphodolichol | Golgi Apparatus       |
| m3macchitppdol | (alpha-D-mannosyl)3-beta-D-mannosyl-diacetylchitodiphosphodolichol       | Golgi Apparatus       |
| m4macchitppdol | (alpha-D-Mannosyl)4-beta-D-mannosyl-diacetylchitobiosyldiphosphodolichol | Golgi Apparatus       |
| macchitppdol   | beta-D-Mannosyldiacetylchitobiosyldiphosphodolichol                      | Golgi Apparatus       |
| MALACP         | Malonyl-[acyl-carrier protein]                                           | Cytosol               |
| MALACP         | Malonyl-[acyl-carrier protein]                                           | Mitochondria          |
| MALCoA         | Malonyl-CoA                                                              | Cytosol               |
| MALCoA         | Malonyl-CoA                                                              | Mitochondria          |
| MAL            | L-Malate                                                                 | Cytosol               |
| MAL            | L-Malate                                                                 | Mitochondria          |
| MAL            | L-Malate                                                                 | Peroxisome            |
| MALt           | Maltose                                                                  | Cytosol               |
| man            | D-Mannose                                                                | Cytosol               |
| man1p          | D-Mannose 1-phosphate                                                    | Cytosol               |
| man2mi1p       | Mannose-(inositol-P)2                                                    | Cytosol               |
| man6p          | D-Mannose 6-phosphate                                                    | Cytosol               |
| manmi1p        | mannose-1D-myo-Inositol 1-phosphate                                      | Cytosol               |
| mannan         | Mannan                                                                   | Cytosol               |

|          |                                                       |                                                   |
|----------|-------------------------------------------------------|---------------------------------------------------|
| mannan   | Mannan                                                | Endoplasmic Reticulum                             |
| mant     | Manninotriose                                         | Extracellular                                     |
| melib    | Melibiose                                             | Cytosol                                           |
| melt     | melibiitol                                            | Extracellular                                     |
| methf    | 5,10-Methenyltetrahydrofolate                         | Cytosol                                           |
| methf    | 5,10-Methenyltetrahydrofolate                         | Mitochondria                                      |
| MET      | L-Methionine                                          | Cytosol                                           |
| MET      | L-Methionine                                          | Mitochondria                                      |
| mettrna  | L-Methionyl-tRNA (Met)                                | Cytosol                                           |
| mettrna  | L-Methionyl-tRNA (Met)                                | Mitochondria                                      |
| mev-R    | (R)-Mevalonate                                        | Cytosol                                           |
| mohman   | 3-Methoxy-4-hydroxymandelate                          | ???                                               |
| mohpacal | 3-Methoxy-4-hydroxyphenylacetaldehyde                 | ???                                               |
| mohpeg   | 3-Methoxy-4-hydroxyphenylethyleneglycol               | ???                                               |
| mohpgal  | 3-Methoxy-4-hydroxyphenylglycolaldehyde               | ???                                               |
| mhpglu   | 5-Methyltetrahydropteroyltri-L-glutamate              | Cytosol                                           |
| mi13456p | 1D-myo-Inositol 1,3,4,5,6-pentakisphosphate           | Cytosol                                           |
| mi13456p | 1D-myo-Inositol 1,3,4,5,6-pentakisphosphate           | Nucleus                                           |
| mi1345p  | 1D-myo-Inositol 1,3,4,5-tetrakisphosphate             | Nucleus                                           |
| mi1456p  | 1D-myo-Inositol 1,4,5,6-tetrakisphosphate             | Nucleus                                           |
| mi145p   | 1D-myo-Inositol 1,4,5-trisphosphate                   | Cytosol                                           |
| mi145p   | 1D-myo-Inositol 1,4,5-trisphosphate                   | Nucleus                                           |
| mi1p     | 1D-myo-Inositol 1-phosphate                           | Cytosol                                           |
| micit    | methylisocitrate                                      | Mitochondria                                      |
| minohp   | myo-Inositol hexakisphosphate                         | Cytosol                                           |
| minohp   | myo-Inositol hexakisphosphate                         | Nucleus                                           |
| mip2c124 | mannose-(inositol-P)2-ceramide, ceramide-1 (24C)      | Cytosol                                           |
| mip2c126 | mannose-(inositol-P)2-ceramide, ceramide-1 (26C)      | Cytosol                                           |
| mip2c224 | mannose-(inositol-P)2-ceramide, ceramide-2 (24C)      | Cytosol                                           |
| mip2c226 | mannose-(inositol-P)2-ceramide, ceramide-2 (26C)      | Cytosol                                           |
| mip2c324 | mannose-(inositol-P)2-ceramide, ceramide-3 (24C)      | Cytosol                                           |
| mip2c326 | mannose-(inositol-P)2-ceramide, ceramide-3 (26C)      | Cytosol                                           |
| mipc124  | mannose-inositol phosphorylceramide, ceramide-1 (24C) | Cytosol                                           |
| mipc126  | mannose-inositol phosphorylceramide, ceramide-1 (26C) | Cytosol                                           |
| mipc224  | mannose-inositol phosphorylceramide, ceramide-2 (24C) | Cytosol                                           |
| mipc226  | mannose-inositol phosphorylceramide, ceramide-2 (26C) | Cytosol                                           |
| mipc324  | mannose-inositol phosphorylceramide, ceramide-3 (24C) | Cytosol                                           |
| mipc326  | mannose-inositol phosphorylceramide, ceramide-3 (26C) | Cytosol                                           |
| mlthf    | 5,10-Methylenetetrahydrofolate                        | Cytosol                                           |
| mlthf    | 5,10-Methylenetetrahydrofolate                        | Mitochondria                                      |
| mmet     | S-Methyl-L-methionine                                 | Cytosol                                           |
| mnep     | L-Metanephrine                                        | ???                                               |
| motam    | 3-Methoxytyramine                                     | ???                                               |
| mthgx1   | Methylglyoxal                                         | Cytosol                                           |
| C140ACP  | Myristoyl-ACP (n-C14:0ACP)                            | Cytosol                                           |
| C140ACP  | Myristoyl-ACP (n-C14:0ACP)                            | Mitochondria                                      |
| N1aspmid | N1-Acetylspermidine                                   | Cytosol                                           |
| N1sprm   | N1-Acetylspermine                                     | Cytosol                                           |
| n4abutn  | N4-Acetylaminoobutanal                                | Cytosol                                           |
| na1      | Sodium                                                | Cytosol                                           |
| nac      | Nicotinate                                            | Cytosol                                           |
| nac      | Nicotinate                                            | Mitochondria                                      |
| NAD      | Nicotinamide adenine dinucleotide                     | Cytosol, ER, Mitochondria,<br>Nucleus, Peroxisome |
| NADH     | Nicotinamide adenine dinucleotide - reduced           | Cytosol, ER, Mitochondria,<br>Peroxisome          |

|          |                                                       |                                            |
|----------|-------------------------------------------------------|--------------------------------------------|
| NADP     | Nicotinamide adenine dinucleotide phosphate           | Cytosol, ER, Mitochondria, Peroxisome      |
| NADPH    | Nicotinamide adenine dinucleotide phosphate - reduced | Cytosol, ER, Mitochondria, Peroxisome      |
| Nbfortyr | N,N-bisFORM yl-dityrosine                             | Cytosol                                    |
| ncam     | Nicotinamide                                          | Cytosol                                    |
| ncam     | Nicotinamide                                          | Mitochondria                               |
| Nfortyr  | N-FORM yl-L-tyrosine                                  | Cytosol                                    |
| NH4      | Ammonium                                              | Cytosol, Mitochondria, Nucleus, Peroxisome |
| nicrnt   | Nicotinate D-ribonucleotide                           | Cytosol                                    |
| nicrnt   | Nicotinate D-ribonucleotide                           | Mitochondria                               |
| nmn      | NMN                                                   | Cytosol                                    |
| nmn      | NMN                                                   | Mitochondria                               |
| nmn      | NMN                                                   | Peroxisome                                 |
| noadren  | L-Noradrenaline                                       | ???                                        |
| nomnep   | L-Normetanephine                                      | ???                                        |
| NPmehis  | N(pai)-Methyl-L-histidine                             | Cytosol                                    |
| O2       | O2                                                    | Cytosol, ER, Mitochondria, Peroxisome      |
| oaa      | Oxaloacetate                                          | Cytosol                                    |
| oaa      | Oxaloacetate                                          | Mitochondria                               |
| oaa      | Oxaloacetate                                          | Peroxisome                                 |
| C080ACP  | Octanoyl-ACP (n-C8:0ACP)                              | Mitochondria                               |
| C080CoA  | Octanoyl-CoA (n-C8:0CoA)                              | Cytosol                                    |
| C080CoA  | Octanoyl-CoA (n-C8:0CoA)                              | Peroxisome                                 |
| C180     | octadecanoate (n-C18:0)                               | Cytosol                                    |
| C180     | octadecanoate (n-C18:0)                               | Peroxisome                                 |
| C180ACP  | Octadecanoyl-ACP (n-C18:0ACP)                         | Cytosol                                    |
| C180ACP  | Octadecanoyl-ACP (n-C18:0ACP)                         | Mitochondria                               |
| C181     | octadecenoate (n-C18:1)                               | Cytosol                                    |
| C182     | octadecadienoate (n-C18:2)                            | Cytosol                                    |
| C182ACP  | Octadecynoyl-ACP (n-C18:2ACP)                         | Cytosol                                    |
| C182ACP  | Octadecynoyl-ACP (n-C18:2ACP)                         | Mitochondria                               |
| C182CoA  | Octadecynoyl-CoA (n-C18:2CoA)                         | Cytosol                                    |
| C182CoA  | Octadecynoyl-CoA (n-C18:2CoA)                         | Peroxisome                                 |
| C080     | octanoate (n-C8:0)                                    | Cytosol                                    |
| C080     | octanoate (n-C8:0)                                    | Peroxisome                                 |
| C181ACP  | cis-octadec-11-enoyl-[acyl-carrier protein] (n-C18:1) | Cytosol                                    |
| C181ACP  | cis-octadec-11-enoyl-[acyl-carrier protein] (n-C18:1) | Mitochondria                               |
| od2CoA   | trans-Octadec-2-enoyl-CoA                             | Peroxisome                                 |
| C181CoA  | Octadecenoyl-CoA (n-C18:1CoA)                         | Cytosol                                    |
| C181CoA  | Octadecenoyl-CoA (n-C18:1CoA)                         | Peroxisome                                 |
| oh1      | hydroxide ion                                         | Cytosol                                    |
| oh1      | hydroxide ion                                         | Mitochondria                               |
| ohpb     | 2-Oxo-3-hydroxy-4-phosphobutanoate                    | Cytosol                                    |
| orn      | Ornithine                                             | Cytosol                                    |
| orn      | Ornithine                                             | Mitochondria                               |
| orot     | Orotate                                               | Cytosol                                    |
| orot5p   | Orotidine 5'-phosphate                                | Cytosol                                    |
| oxag     | Oxaloglutarate                                        | Cytosol                                    |
| oxag     | Oxaloglutarate                                        | Mitochondria                               |
| pa       | Phosphatidate                                         | Cytosol                                    |
| pa       | Phosphatidate                                         | Mitochondria                               |
| pac      | Phenylacetic acid                                     | Cytosol                                    |
| pacald   | Phenylacetaldehyde                                    | Cytosol                                    |



|            |                                       |                       |
|------------|---------------------------------------|-----------------------|
| pacald     | Phenylacetaldehyde                    | Mitochondria          |
| pad        | 2-Phenylacetamide                     | Cytosol               |
| C160ACP    | Palmitoyl-ACP (n-C16:0ACP)            | Cytosol               |
| C160ACP    | Palmitoyl-ACP (n-C16:0ACP)            | Mitochondria          |
| pan4p      | Pantetheine 4'-phosphate              | Cytosol               |
| pan4p      | Pantetheine 4'-phosphate              | Mitochondria          |
| pan4p      | Pantetheine 4'-phosphate              | Peroxisome            |
| pant-R     | (R)-Pantoate                          | Cytosol               |
| pant-R     | (R)-Pantoate                          | Mitochondria          |
| pap        | Adenosine 3',5'-bisphosphate          | Cytosol               |
| pap        | Adenosine 3',5'-bisphosphate          | Mitochondria          |
| pap        | Adenosine 3',5'-bisphosphate          | Peroxisome            |
| paps       | 3'-Phosphoadenylyl sulfate            | Cytosol               |
| pc         | Phosphatidylcholine                   | Cytosol               |
| pdx5p      | Pyridoxine 5'-phosphate               | Cytosol               |
| pe         | phosphatidylethanolamine              | Cytosol               |
| pe         | phosphatidylethanolamine              | Golgi Apparatus       |
| pe         | phosphatidylethanolamine              | Mitochondria          |
| pe         | phosphatidylethanolamine              | Vacuole               |
| pea        | Phenylethylamine                      | Cytosol               |
| PNPP       | all-trans-Pentaprenyl diphosphate     | Cytosol               |
| PNPP       | all-trans-Pentaprenyl diphosphate     | Mitochondria          |
| PEP        | Phosphoenolpyruvate                   | Cytosol               |
| PEP        | Phosphoenolpyruvate                   | Mitochondria          |
| PEPd       | PEptide                               | Cytosol               |
| pg         | Phosphatidylglycerol                  | Mitochondria          |
| pgp        | Phosphatidylglycerophosphate          | Mitochondria          |
| pheac      | Phenethyl acetate                     | Cytosol               |
| PHE        | L-Phenylalanine                       | Cytosol               |
| PHE        | L-Phenylalanine                       | Mitochondria          |
| pHEME      | Protoheme                             | Mitochondria          |
| phetrna    | L-Phenylalanyl-tRNA(Phe)              | Cytosol               |
| phetrna    | L-Phenylalanyl-tRNA(Phe)              | Mitochondria          |
| phom       | O-Phospho-L-homoserine                | Cytosol               |
| phpyr      | Phenylpyruvate                        | Cytosol               |
| phthr      | O-Phospho-4-hydroxy-L-threonine       | Cytosol               |
| Pi         | Phosphate                             | Cytosol               |
| Pi         | Phosphate                             | Golgi Apparatus       |
| Pi         | Phosphate                             | Mitochondria          |
| Pi         | Phosphate                             | Nucleus               |
| Pi         | Phosphate                             | Endoplasmic Reticulum |
| Pi         | Phosphate                             | Vacuole               |
| Pi         | Phosphate                             | Peroxisome            |
| C160CoA    | Palmitoyl-CoA (n-C16:0CoA)            | Cytosol               |
| C160CoA    | Palmitoyl-CoA (n-C16:0CoA)            | Peroxisome            |
| pnto-R     | (R)-Pantothenate                      | Cytosol               |
| ppbng      | Porphobilinogen                       | Cytosol               |
| ppCoA      | Propanoyl-CoA                         | Mitochondria          |
| pphn       | Prephenate                            | Cytosol               |
| PPi        | Diphosphate                           | Cytosol               |
| PPi        | Diphosphate                           | Mitochondria          |
| PPi        | Diphosphate                           | Nucleus               |
| PPi        | Diphosphate                           | Peroxisome            |
| ppmi12346p | 5-Diphosphoinositol pentakisphosphate | Cytosol               |
| ppmi1346p  | Diphosphoinositol tetrakisphosphate   | Cytosol               |

|           |                                                                                                      |                       |
|-----------|------------------------------------------------------------------------------------------------------|-----------------------|
| ppp9      | Protoporphyrin                                                                                       | Mitochondria          |
| pppg9     | Protoporphyrinogen IX                                                                                | Cytosol               |
| pppg9     | Protoporphyrinogen IX                                                                                | Mitochondria          |
| pram      | 5-Phospho-beta-D-ribosylamine                                                                        | Cytosol               |
| pran      | N-(5-Phospho-D-ribosyl)anthranilate                                                                  | Cytosol               |
| prbamp    | 1-(5-Phosphoribosyl)-AMP                                                                             | Cytosol               |
| prbatp    | 1-(5-Phosphoribosyl)-ATP                                                                             | Cytosol               |
| prfp      | 1-(5-Phosphoribosyl)-5-[(5-phosphoribosylamino)methylideneamino]imidazole-4-carboxamide              | Cytosol               |
| prlp      | 5-[(5-phospho-1-deoxyribulos-1-ylamino)methylideneamino]-1-(5-phosphoribosyl)imidazole-4-carboxamide | Cytosol               |
| PRO       | L-Proline                                                                                            | Cytosol               |
| PRO       | L-Proline                                                                                            | Mitochondria          |
| protrna   | L-Prolyl-tRNA(Pro)                                                                                   | Cytosol               |
| prpp      | 5-Phospho-alpha-D-ribose 1-diphosphate                                                               | Cytosol               |
| prpp      | 5-Phospho-alpha-D-ribose 1-diphosphate                                                               | Mitochondria          |
| ps        | phosphatidylserine                                                                                   | Cytosol               |
| ps        | phosphatidylserine                                                                                   | Golgi Apparatus       |
| ps        | phosphatidylserine                                                                                   | Mitochondria          |
| ps        | phosphatidylserine                                                                                   | Vacuole               |
| psd5p     | Pseudouridine 5'-phosphate                                                                           | Cytosol               |
| pser      | O-Phospho-Lerine                                                                                     | Cytosol               |
| psph1p    | Phytosphingosine 1-phosphate                                                                         | Cytosol               |
| psph1p    | Phytosphingosine 1-phosphate                                                                         | Endoplasmic Reticulum |
| psphings  | Phytosphingosine                                                                                     | Cytosol               |
| psphings  | Phytosphingosine                                                                                     | Endoplasmic Reticulum |
| ptd134bp  | phosphatidyl-1D-myo-inositol 3,4-bisphosphate                                                        | Cytosol               |
| ptd135bp  | 1-Phosphatidyl-D-myo-inositol 3,5-bisphosphate                                                       | Cytosol               |
| ptd145bp  | 1-Phosphatidyl-D-myo-inositol 4,5-bisphosphate                                                       | Cytosol               |
| ptd345tp  | 1-Phosphatidyl-1D-myo-inositol 3,4,5-trisphosphate                                                   | Cytosol               |
| ptd1ino   | phosphatidyl-1D-myo-inositol                                                                         | Cytosol               |
| ptd1ino   | phosphatidyl-1D-myo-inositol                                                                         | Nucleus               |
| ptd2meeta | Phosphatidyl-N-dimethylethanolamine                                                                  | Cytosol               |
| ptd3ino   | phosphatidyl-1D-myo-3-inositol                                                                       | Cytosol               |
| ptd4ino   | phosphatidyl-1D-myo-4-inositol, yeast specific                                                       | Cytosol               |
| ptd4ino   | phosphatidyl-1D-myo-4-inositol, yeast specific                                                       | Nucleus               |
| ptdmeeta  | Phosphatidyl-N-methylethanolamine                                                                    | Cytosol               |
| ptrc      | Putrescine                                                                                           | Cytosol               |
| pyam5p    | Pyridoxamine 5'-phosphate                                                                            | Cytosol               |
| pydam     | Pyridoxamine                                                                                         | Cytosol               |
| pydx      | Pyridoxal                                                                                            | Cytosol               |
| pydx5p    | Pyridoxal 5'-phosphate                                                                               | Cytosol               |
| pydxn     | Pyridoxine                                                                                           | Cytosol               |
| PYR       | Pyruvate                                                                                             | Cytosol               |
| PYR       | Pyruvate                                                                                             | Mitochondria          |
| PYR       | Pyruvate                                                                                             | Peroxisome            |
| q6        | Ubiquinone-6                                                                                         | Mitochondria          |
| q6h2      | Ubiquinol-6                                                                                          | Mitochondria          |
| quln      | Quinolate                                                                                            | Cytosol               |
| quln      | Quinolate                                                                                            | Mitochondria          |
| r1p       | alpha-D-Ribose 1-phosphate                                                                           | Cytosol               |
| r1p       | alpha-D-Ribose 1-phosphate                                                                           | Mitochondria          |
| r5p       | alpha-D-Ribose 5-phosphate                                                                           | Cytosol               |
| raffin    | Raffinose                                                                                            | Cytosol               |
| rib       | D-Ribose                                                                                             | Cytosol               |
| ribflv    | Riboflavin                                                                                           | Cytosol               |

|          |                                |                       |
|----------|--------------------------------|-----------------------|
| ribflv   | Riboflavin                     | Mitochondria          |
| rnam     | N-Ribosylnicotinamide          | Cytosol               |
| ru5p     | D-Ribulose 5-phosphate         | Cytosol               |
| s        | Sulfur                         | Cytosol               |
| s17bp    | Sedoheptulose 1,7-bisphosphate | Cytosol               |
| s7p      | Sedoheptulose 7-phosphate      | Cytosol               |
| sacchrp  | Laccharopine                   | Cytosol               |
| sbt      | Dorbitol                       | Cytosol               |
| sbt      | Lorbitol                       | Cytosol               |
| scl      | sirohydrochlorin               | Cytosol               |
| sdhlam   | Succinyl dihydro lipamide      | Mitochondria          |
| selt     | Selenite                       | Cytosol               |
| seld     | Selenide                       | Cytosol               |
| SER      | Lerine                         | Cytosol               |
| SER      | Lerine                         | Mitochondria          |
| sertrna  | Leryl-tRNA(Ser)                | Cytosol               |
| Sfglutth | S-FORM ylglutathione           | Cytosol               |
| sft      | Sulfatide                      | Cytosol               |
| dgala    | Digalactosylceramide           | Cytosol               |
| sheme    | Siroheme                       | Cytosol               |
| skm      | Shikimate                      | Cytosol               |
| skm5p    | Shikimate 5-phosphate          | Cytosol               |
| SO3      | Sulfite                        | Cytosol               |
| SO4      | Sulfate                        | Cytosol               |
| sph1p    | Sphinganine 1-phosphate        | Cytosol               |
| sph1p    | Sphinganine 1-phosphate        | Endoplasmic Reticulum |
| sphgn    | Sphinganine                    | Cytosol               |
| sphgn    | Sphinganine                    | Endoplasmic Reticulum |
| spmd     | Spermidine                     | Cytosol               |
| sprm     | Spermine                       | Cytosol               |
| SQL      | Squalene                       | Cytosol               |
| SQL      | Squalene                       | Endoplasmic Reticulum |
| srb      | Lorbose                        | Cytosol               |
| ESQL     | (S)qualene-2,3-epoxide         | Cytosol               |
| ESQL     | (S)qualene-2,3-epoxide         | Endoplasmic Reticulum |
| sta      | Stachyose                      | Cytosol               |
| C180CoA  | Stearoyl-CoA (n-C18:0CoA)      | Cytosol               |
| C180CoA  | Stearoyl-CoA (n-C18:0CoA)      | Peroxisome            |
| succ     | Succinate                      | Cytosol               |
| succ     | Succinate                      | Mitochondria          |
| sucCoA   | Succinyl-CoA                   | Mitochondria          |
| suchms   | Ouccinyl-L-homoserine          | Cytosol               |
| sucr     | Sucrose                        | Cytosol               |
| sucr6p   | Sucrose-6-phosphate            | Cytosol               |
| sucsal   | Succinic semialdehyde          | Cytosol               |
| T4hcinm  | trans-4-Hydroxycinnamate       | Mitochondria          |
| TAG      | Triacylglycerol, triglyceride  | Cytosol               |
| TAG      | Triacylglycerol, triglyceride  | Endoplasmic Reticulum |
| taG6P    | D-Tagatose 6-phosphate         | Cytosol               |
| taGDP    | D-Tagatose 1,6-biphosphate     | Cytosol               |
| tam      | Tyramine                       | Cytosol               |
| taur     | Taurine                        | Cytosol               |
| tchola   | taurocholic acid               | Cytosol               |
| tchola   | taurocholic acid               | Vacuole               |
| td2CoA   | trans-Tetradec-2-enoyl-CoA     | Peroxisome            |

|         |                                                       |              |
|---------|-------------------------------------------------------|--------------|
| C140CoA | Tetradecanoyl-CoA (n-C14:0CoA)                        | Cytosol      |
| C140CoA | Tetradecanoyl-CoA (n-C14:0CoA)                        | Peroxisome   |
| C141ACP | cis-tetradec-7-enoyl-[acyl-carrier protein] (n-C14:1) | Cytosol      |
| C141ACP | cis-tetradec-7-enoyl-[acyl-carrier protein] (n-C14:1) | Mitochondria |
| C141CoA | Tetradecenoyl-CoA (n-C14:1CoA)                        | Cytosol      |
| C141CoA | Tetradecenoyl-CoA (n-C14:1CoA)                        | Peroxisome   |
| tg1p    | N-TetradecanoylglycylPEptide                          | Cytosol      |
| thf     | 5,6,7,8-Tetrahydrofolate                              | Cytosol      |
| thf     | 5,6,7,8-Tetrahydrofolate                              | Mitochondria |
| thfglu  | Tetrahydrofolyl-[Glu](2)                              | Cytosol      |
| thm     | Thiamin                                               | Cytosol      |
| thmmp   | Thiamin monophosphate                                 | Cytosol      |
| thmpp   | Thiamine diphosphate                                  | Cytosol      |
| thmpp   | Thiamine diphosphate                                  | Mitochondria |
| thmtp   | Thiamin triphosphate                                  | Cytosol      |
| THR     | L-Threonine                                           | Cytosol      |
| THR     | L-Threonine                                           | Mitochondria |
| thtrna  | L-Threonyl-tRNA(Thr)                                  | Cytosol      |
| thtrna  | L-Threonyl-tRNA(Thr)                                  | Mitochondria |
| thym    | Thymine                                               | Cytosol      |
| thymd   | Thymidine                                             | Cytosol      |
| trdox   | Oxidized thioredoxin                                  | Cytosol      |
| trdox   | Oxidized thioredoxin                                  | Mitochondria |
| trdox   | Oxidized thioredoxin                                  | Nucleus      |
| trdox   | Oxidized thioredoxin                                  | Peroxisome   |
| trdrd   | Reduced thioredoxin                                   | Cytosol      |
| trdrd   | Reduced thioredoxin                                   | Mitochondria |
| trdrd   | Reduced thioredoxin                                   | Nucleus      |
| trdrd   | Reduced thioredoxin                                   | Peroxisome   |
| tre     | Trehalose                                             | Cytosol      |
| tre     | Trehalose                                             | Vacuole      |
| tre6p   | alpha,alpha'-Trehalose 6-phosphate                    | Cytosol      |
| trnaala | tRNA(Ala)                                             | Cytosol      |
| trnaarg | tRNA(Arg)                                             | Cytosol      |
| trnaarg | tRNA(Arg)                                             | Mitochondria |
| trnaasn | tRNA(Asn)                                             | Cytosol      |
| trnaasn | tRNA(Asn)                                             | Mitochondria |
| trnaasp | tRNA(Asp)                                             | Cytosol      |
| trnaasp | tRNA(Asp)                                             | Mitochondria |
| trnacys | tRNA(Cys)                                             | Cytosol      |
| trnagln | tRNA(Gln)                                             | Cytosol      |
| trnaglu | tRNA (Glu)                                            | Cytosol      |
| trnaglu | tRNA (Glu)                                            | Mitochondria |
| trnagly | tRNA(Gly)                                             | Cytosol      |
| trnahis | tRNA(His)                                             | Cytosol      |
| trnahis | tRNA(His)                                             | Mitochondria |
| trnaile | tRNA(Ile)                                             | Cytosol      |
| trnaile | tRNA(Ile)                                             | Mitochondria |
| trnaleu | tRNA(Leu)                                             | Cytosol      |
| trnaleu | tRNA(Leu)                                             | Mitochondria |
| trnalys | tRNA(Lys)                                             | Cytosol      |
| trnalys | tRNA(Lys)                                             | Mitochondria |
| trnamet | tRNA(Met)                                             | Cytosol      |
| trnamet | tRNA(Met)                                             | Mitochondria |
| trnaphe | tRNA(Phe)                                             | Cytosol      |

|          |                                        |                 |
|----------|----------------------------------------|-----------------|
| trnaphe  | tRNA(Phe)                              | Mitochondria    |
| trnapro  | tRNA(Pro)                              | Cytosol         |
| trnaser  | tRNA(Ser)                              | Cytosol         |
| trnathr  | tRNA(Thr)                              | Cytosol         |
| trnathr  | tRNA(Thr)                              | Mitochondria    |
| trnatrp  | tRNA(Trp)                              | Cytosol         |
| trnatrp  | tRNA(Trp)                              | Mitochondria    |
| trnatyr  | tRNA(Tyr)                              | Cytosol         |
| trnatyr  | tRNA(Tyr)                              | Mitochondria    |
| trnaval  | tRNA(Val)                              | Cytosol         |
| trnaval  | tRNA(Val)                              | Mitochondria    |
| TRP      | L-Tryptophan                           | Cytosol         |
| TRP      | L-Tryptophan                           | Mitochondria    |
| trptrna  | L-Tryptophanyl-tRNA(Trp)               | Cytosol         |
| trptrna  | L-Tryptophanyl-tRNA(Trp)               | Mitochondria    |
| C140     | tetradecanoate (n-C14:0)               | Cytosol         |
| C140     | tetradecanoate (n-C14:0)               | Peroxisome      |
| C141     | tetradecenoate (n-C14:1)               | Cytosol         |
| C141     | tetradecenoate (n-C14:1)               | Peroxisome      |
| TYR      | L-Tyrosine                             | Cytosol         |
| TYR      | L-Tyrosine                             | Mitochondria    |
| TYR      | L-Tyrosine                             | Vacuole         |
| TYR      | L-Tyrosine                             | Peroxisome      |
| tyrtrna  | L-Tyrosyl-tRNA(Tyr)                    | Cytosol         |
| tyrtrna  | L-Tyrosyl-tRNA(Tyr)                    | Mitochondria    |
| UDP      | UDP                                    | Cytosol         |
| UDP      | UDP                                    | Nucleus         |
| udpacgal | UDP-N-acetyl-D-galactosamine           | Cytosol         |
| udpg     | UDPglucose                             | Cytosol         |
| udpgal   | UDPgalactose                           | Cytosol         |
| udpgal   | UDPgalactose                           | Golgi Apparatus |
| UMP      | UMP                                    | Cytosol         |
| UMP      | UMP                                    | Mitochondria    |
| UMP      | UMP                                    | Nucleus         |
| up4u     | P1,P4-Bis(5'-uridyl) tetraphosphate    | Cytosol         |
| uppg3    | Uroporphyrinogen III                   | Cytosol         |
| ura      | Uracil                                 | Cytosol         |
| urdglyc  | (-)-Ureidoglycolate                    | Cytosol         |
| urea     | Urea                                   | Cytosol         |
| uri      | Uridine                                | Cytosol         |
| UTP      | UTP                                    | Cytosol         |
| UTP      | UTP                                    | Mitochondria    |
| VAL      | L-Valine                               | Cytosol         |
| VAL      | L-Valine                               | Mitochondria    |
| valtrna  | L-Valyl-tRNA(Val)                      | Cytosol         |
| valtrna  | L-Valyl-tRNA(Val)                      | Mitochondria    |
| xan      | Xanthine                               | Cytosol         |
| XMP      | Xanthosine 5'-phosphate                | Cytosol         |
| xtsn     | Xanthosine                             | Cytosol         |
| xp4x     | P1,P4-Bis(5'-xanthosyl) tetraphosphate | Cytosol         |
| xu5p     | D-Xylulose 5-phosphate                 | Cytosol         |
| xyl      | D-Xylose                               | Cytosol         |
| xylt     | Xylitol                                | Cytosol         |
| xylu     | D-Xylulose                             | Cytosol         |
| zym_int1 | zymosterol intermediate 1              | Cytosol         |

zym\_int2  
zymst  
zymstest

zymosterol intermediate 2  
zymosterol  
zymosterol ester

Cytosol  
Cytosol  
Cytosol
