# Supplementary material for: Genome-scale metabolic model of the fission yeast Schizosaccharomyces pombe and the reconciliation of in silico/in vivo mutant growth
Source: PubMed Central journal article supplement (PMC3390277; doi:10.1186/1752-0509-6-49), 2012-07-05
Supplement: 1752-0509-6-49-S2.pdf [file 1752-0509-6-49-S2.pdf]

### **Supporting Information 2A: SpoMBEL1693 Characteristics**

|                                                       |           |
|-------------------------------------------------------|-----------|
| Genome size                                           | 12.5 Mbps |
| Chromosomes                                           | 3         |
| Number of genes annotated                             | 4940      |
| Number of genes represented<br>in the metabolic model | 605       |
| Percentage of total genes                             | 12.2%     |
| Reaction number                                       | 1693      |
| Metabolite number                                     | 1703      |

**Supporting Information 2B: Biomass composition of *S. pombe* used in SpoMBEL1693**

**Biomass biosynthesis equation (in g for synthesis of 1 g biomass):**

0.44 PROTEIN + 0.07 RNA + 0.036 DNA + 0.07 PHOSPHOLIPID + 0.03 COF + 0.110 CW + 0.28 CARBOHYDRATE -> BIOMASS

**Table 1. Protein (Amino acid) composition:**

| Amino acid                                   | % protein (w/w) | MW <sup>a</sup> , g/mol | mmol/g protein |
|----------------------------------------------|-----------------|-------------------------|----------------|
| Alanine                                      | 0.0682091       | 71.09                   | 0.959          |
| Arginine                                     | 0.046196        | 156.20                  | 0.296          |
| Asparagine                                   | 0.032584        | 114.12                  | 0.286          |
| Aspartate                                    | 0.0328652       | 115.10                  | 0.286          |
| Cysteine                                     | 0.0035493       | 103.16                  | 0.034          |
| Glutamate                                    | 0.0469295       | 128.15                  | 0.366          |
| Glutamine                                    | 0.0472903       | 129.13                  | 0.366          |
| Glycine                                      | 0.0678581       | 57.07                   | 1.189          |
| Histidine                                    | 0.0344552       | 137.16                  | 0.251          |
| Isoleucine                                   | 0.0670973       | 113.18                  | 0.593          |
| Leucine                                      | 0.085981        | 113.18                  | 0.760          |
| Lysine                                       | 0.0282115       | 128.19                  | 0.220          |
| Methionine                                   | 0.0194217       | 131.21                  | 0.148          |
| Phenylalanine                                | 0.0702684       | 147.19                  | 0.477          |
| Proline                                      | 0.1163426       | 97.13                   | 1.198          |
| Serine                                       | 0.0564002       | 87.09                   | 0.648          |
| Threonine                                    | 0.077702        | 101.12                  | 0.768          |
| Tryptophan                                   | 0.000736        | 186.23                  | 0.004          |
| Tyrosine                                     | 0.0184996       | 163.19                  | 0.113          |
| Valine                                       | 0.0794029       | 99.15                   | 0.801          |
| Energy requirement for polymerisation (ATP): |                 |                         | 41.5           |

<sup>a</sup> water is subtracted from MW to account for water excretion during peptide bond formation

Protein biosynthesis equation is therefore (in mmol for synthesis of 1 g protein):

0.959 ala\_c + 0.266 arg\_c + 0.286 asn\_c + 0.286 asp\_c + 0.034 cys\_c + 0.366 gln\_c + 0.366 glu\_c + 1.189 gly\_c + 0.251 his\_c + 0.593 ile\_c + 0.760 leu\_c + 0.220 lys\_c + 0.148 met\_c + 0.477 phe\_c + 1.198 pro\_c + 0.648 ser\_c + 0.768 thr\_c + 0.004 trp\_c + 0.113 tyr\_c + 0.801 val\_c + 41.5 atp\_c -> 41.5 adp\_c + 41.5 pi\_c + PROTEIN

**Table 2. DNA composition:**

The composition of DNA was calculated from the genomic sequence of *S. pombe*. Energy requirement for polymerisation of triphosphates was from (Ingraham et al., 1983).

| Nucleotide                                   | mol/mol DNA | MW <sup>a</sup> , g/mol | mmol/g DNA |
|----------------------------------------------|-------------|-------------------------|------------|
| dAMP                                         | 0.320       | 313.2                   | 1.029      |
| dCMP                                         | 0.180       | 289.2                   | 0.579      |
| dTMP                                         | 0.320       | 304.2                   | 1.029      |
| dGMP                                         | 0.180       | 329.2                   | 0.579      |
| Energy requirement for polymerisation (ATP): |             |                         | 4.40       |

<sup>a</sup> the molecular weight is the weight of the nucleotide monophosphate subtracted 1 water, which is lost during esterification

DNA biosynthesis equation is therefore (in mmol for synthesis of 1 g DNA):

1.029 datp\_n + 0.579 dctp\_n + 1.029 dtp\_n + 0.579 dgtp\_n + 26.0 atp\_n -> DNA + 26.0 adp\_n + 26.0 pi\_n + 3.223 ppi\_n

**Table 3. RNA composition:**

It was assumed that RNA consisted of 5% mRNA, 75% rRNA and 20% tRNA (molar). The nucleotide composition of mRNA was taken as for genomic DNA. The nucleotide composition of rRNA was calculated from the sequences of 16S, 23S and 5S ribosomal RNA units. tRNA composition was found from sequences of leucine and glycine transporting RNAs. All the sequences were obtained from GenBank (<http://www.ncbi.nlm.nih.gov>). Energy requirement for polymerisation of triphosphates was from (Ingraham et al., 1983).

| Nucleotide                                   | mol/mol RNA |          |          | MW <sup>a</sup> , g/mol | mol/mol RNA | mmol/g RNA |
|----------------------------------------------|-------------|----------|----------|-------------------------|-------------|------------|
|                                              | mRNA 5%     | rRNA 75% | tRNA 20% |                         |             |            |
| AMP                                          | 1.029       | 0.299    | 0.195    | 329.2                   | 0.314       | 0.880      |
| GMP                                          | 0.579       | 0.224    | 0.307    | 345.2                   | 0.258       | 0.723      |
| CMP                                          | 1.029       | 0.170    | 0.243    | 305.2                   | 0.228       | 0.637      |
| UMP                                          | 0.579       | 0.307    | 0.255    | 306.2                   | 0.310       | 0.869      |
| Energy requirement for polymerisation (ATP): |             |          |          |                         | 1.25        |            |

<sup>a</sup> the molecular weight is the weight of the nucleotide monophosphate subtracted 1 water, which is lost during esterification

RNA biosynthesis equation is therefore (in mmol for synthesis of 1 g RNA):

0.880 atp\_n + 0.723 gtp\_n + 0.637 ctp\_n + 0.869 utp\_n + 1.25 atp\_n -> RNA + 1.25 adp\_n + 1.25 pi\_n + 3.119 ppi\_n

**Table 4. Phospholipids composition:**

| Component                | g/g phospholipids | mmol/g phospholipids |
|--------------------------|-------------------|----------------------|
| Phosphatidylinositol     | 0.20              | 0.228                |
| Phosphatidylcholine      | 0.40              | 0.511                |
| Phosphatidylserine       | 0.03              | 0.038                |
| Phosphatidylethanolamine | 0.24              | 0.321                |
| Phosphatidylglycerol     | 0.18              | 0.233                |
| Phosphatidic acid        | 0.02              | 0.025                |
| Fecosterol               | 0.02              | 0.012                |
| Cardiolipin              | 0.04              | 0.025                |

Phospholipids biosynthesis equation is therefore (in mmol for synthesis of 1 g phospholipids):

0.229 ptd1ino\_c + 0.514 pc\_c + 0.038 ps\_c + 0.324 pe\_c + 0.235 pg\_m + 0.026 pa\_c + 0.026 cl\_m + 0.012 fecost\_r -> PHOSPHOLIPID

**Table 4.1 Molecular weights of phospholipids components:**

| Constituent              | MW, g/mol |                           |         |
|--------------------------|-----------|---------------------------|---------|
|                          | backbone  | # of fatty acids residues | total   |
| Fecosterol               | 398.664   | 0                         | 398.66  |
| Phosphatidylinositol     | 300.200   | 2                         | 860.45  |
| Phosphatidylcholine      | 223.207   | 2                         | 783.45  |
| Phosphatidylserine       | 223.121   | 2                         | 783.37  |
| Phosphatidylethanolamine | 181.128   | 2                         | 741.37  |
| Phosphatidylglycerol     | 212.139   | 2                         | 772.39  |
| Phosphatidic acid        | 228.094   | 2                         | 788.34  |
| Cardiolipin              | 332.183   | 4                         | 1452.68 |

**Table 4.2 Composition of fatty acids in phospholipids:**

The composition of fatty acids tails in phospholipids was taken from Koukou AI et al 1990

| Fatty acid               | g/g total   | MW <sup>a</sup> , | mmol/g            | mol/mol           |
|--------------------------|-------------|-------------------|-------------------|-------------------|
|                          | fatty acids | g/mol             | total fatty acids | total fatty acids |
| C12                      | 0.004       | 200               | 0.02              | 0.006             |
| C14                      | 0.003       | 228               | 0.01              | 0.004             |
| C16                      | 0.104       | 255               | 0.41              | 0.114             |
| C16:1                    | 0.011       | 253               | 0.04              | 0.012             |
| C18                      | 0.055       | 283               | 0.19              | 0.054             |
| C18:1                    | 0.818       | 281               | 2.91              | 0.815             |
| Average molecular weight | 280         | SUM:              | 1.00              |                   |

<sup>a</sup> molecular weight without a proton

Example: phosphatidylethanolamine biosynthesis equations are therefore (in mol):

GL3P\_c + 0.006 C120ACP\_c + 0.004 C140ACP\_c + 0.114 C160ACP\_c + 0.012 C161ACP\_c + 0.054 C180ACP\_c + 0.815 C181ACP\_c -> AGL3P\_c + ACP\_c  
 AGL3P\_c + 0.006 C120ACP\_c + 0.004 C140ACP\_c + 0.114 C160ACP\_c + 0.012 C161ACP\_c + 0.054 C180ACP\_c + 0.815 C181ACP\_c -> pa\_SP\_c + ACP\_c  
 pa\_SP\_c + ctp\_c -> CDPDG\_c + ppi\_c  
 CDPDG\_c + ser\_c -> cmp\_c + ps\_SP\_c  
 ps\_SP\_c -> pe\_SP\_c + co2\_c

**Table 5. Small molecules pool composition:**

For simplification it was assumed that the selected small molecules are equally represented (w/w) in the pool

| Molecule | MW, g/mol | g/g pool of small molecules | mmol/g pool of small molecules |
|----------|-----------|-----------------------------|--------------------------------|
| NAD      | 664.438   | 0.125                       | 0.188                          |
| NADP     | 744.418   | 0.125                       | 0.168                          |
| COA      | 767.534   | 0.125                       | 0.163                          |
| Q        | 853.365   | 0.125                       | 0.146                          |
| THF      | 445.434   | 0.125                       | 0.281                          |
| hemeA    | 852.837   | 0.125                       | 0.147                          |
| FMN      | 456.348   | 0.125                       | 0.274                          |
| FAD      | 785.557   | 0.125                       | 0.159                          |

<sup>a</sup> molecular mass of recombinant *E. coli* acyl carrier protein (Sigma-Aldrich)

Small molecules pool biosynthesis equation is therefore (in mmol for synthesis of 1 g SMALL MOLECULES):

0.188 nad\_c + 0.168 nadp\_c + 0.163 coa\_c + 0.146 q\_m + 0.281 thf\_c + 0.274 fmn\_c + 0.159 fad\_c + 0.147 hemeA\_m -> COF

**Table 6. Carbohydrates composition:**

Isolation and characterization of *Schizosaccharomyces pombe* mutants defective in cell wall (1-3)beta-D-glucan - Ribas JC et al 1991

| Component     | Molar ratio | MW <sup>a</sup> , g/mol | mmol/g carbohydrate |
|---------------|-------------|-------------------------|---------------------|
| Galactomannan | 0.1         | 325                     | 0.709               |
| a-Glucan      | 0.3         | 162                     | 1.843               |
| b-Glucan      | 0.5         | 162                     | 2.902               |

<sup>a</sup> the molecular weight is subtracted water to account for the bond formation

Carbohydrates biosynthesis equation is therefore (in mmol for synthesis of 1 g carbohydrates):

0.709 galcman\_c + 1.843 Adgln\_c + 2.902 13BDgln\_c + 12.8 atp\_c -> CARBOHYDRATE + 12.8 adp\_c + 12.8 pi\_c  
 gal\_c + man\_c -> galcman\_c

## References

- Effect of ethanol on the phospholipid and fatty acid content of *S pombe* membranes - Koukou AI et al 1990  
 Analysis of a genome-wide set of gene deletions in the fission yeast *Schizosaccharomyces pombe* - Kim DU et al 2010  
 The molecular structures of some glucans from the cell walls of *S pombe* - Manners DJ and Meyer MT 1977  
 Isolation and characterization of *Schizosaccharomyces pombe* mutants defective in cell wall (1-3)beta-D-glucan - Ribas JC et al 1991
