# Supplementary material for: Genome-scale metabolic model of the fission yeast Schizosaccharomyces pombe and the reconciliation of in silico/in vivo mutant growth
Source: PubMed Central journal article supplement (PMC3390277; doi:10.1186/1752-0509-6-49), 2012-07-05
Supplement: 1752-0509-6-49-S4.pdf [file 1752-0509-6-49-S4.pdf]

## Supporting Information 4A: List of False positive predictions from single knockout simulation using SpoMBEL1693

| Metabolic Reaction                                          | Gene                       | False positive reconciliation                                                                       |
|-------------------------------------------------------------|----------------------------|-----------------------------------------------------------------------------------------------------|
| GTP_n + H2O_n -> ahdt_n + FORM_n + h_n                      | SPAC17A5.13                | Redundant reaction in a separate compartment. Deletion of redundant reaction gives lethal phenotype |
| 3ig3p_n + ser_n -> g3p_n + H2O_n + trp_n                    | SPAC19A8.15                | Redundant reaction in a separate compartment. Deletion of redundant reaction gives lethal phenotype |
| ATP_n + glu_n + NH4_n -> ADP_n + gln_n + h_n + pi_n         | SPAC23H4.06                | Redundant reaction in a separate compartment. Deletion of redundant reaction gives lethal phenotype |
| 5dpmev_n + ATP_n -> ADP_n + CO2_n + IPPP_n + pi_n           | SPAC24C9.03                | Redundant reaction in a separate compartment. Deletion of redundant reaction gives lethal phenotype |
| 2pg_n <-> 3pg_n                                             | SPAC26F1.06                | Redundant reaction in a separate compartment. Deletion of redundant reaction gives lethal phenotype |
| coa_n + h_n + hmgcoa_n <-> aacoa_n + accoa_n + H2O_n        | SPAC4F8.14c                | Redundant reaction in a separate compartment. Deletion of redundant reaction gives lethal phenotype |
| coa_r + h_r + hmgcoa_r <-> aacoa_r + accoa_r + H2O_r        | SPAC4F8.14c                | Redundant reaction in a separate compartment. Deletion of redundant reaction gives lethal phenotype |
| ATP_c + h_c + nmnc_c -> NAD_c + PPI_c                       | SPAC806.06c                | Redundant reaction in a separate compartment. Deletion of redundant reaction gives lethal phenotype |
| ATP_n + h_n + nicrnt_n -> dNAD_n + PPI_n                    | SPAC806.06c                | Redundant reaction in a separate compartment. Deletion of redundant reaction gives lethal phenotype |
| ATP_n + h_n + nmnc_n -> NAD_n + PPI_n                       | SPAC806.06c                | Redundant reaction in a separate compartment. Deletion of redundant reaction gives lethal phenotype |
| H2O_c + phthr_c -> 4hthr_c + pi_c                           | SPAC9E9.06c                | Redundant reaction in a separate compartment. Deletion of redundant reaction gives lethal phenotype |
| H2O_n + phom_n -> pi_n + thr_n                              | SPAC9E9.06c                | Redundant reaction in a separate compartment. Deletion of redundant reaction gives lethal phenotype |
| H2O_n + phthr_n -> 4hthr_n + pi_n                           | SPAC9E9.06c                | Redundant reaction in a separate compartment. Deletion of redundant reaction gives lethal phenotype |
| GTP_n + 3 H2O_n -> 25dhpp_n + FORM_n + 2 h_n + PPI_n        | SPAP27G11.09c              | Redundant reaction in a separate compartment. Deletion of redundant reaction gives lethal phenotype |
| IPPP_n <-> dmpp_n                                           | SPBC106.15                 | Redundant reaction in a separate compartment. Deletion of redundant reaction gives lethal phenotype |
| 3pg_n + ATP_n <-> 13dpg_n + ADP_n                           | SPBC14F5.04c               | Redundant reaction in a separate compartment. Deletion of redundant reaction gives lethal phenotype |
| ATP_n + H2O_n + met_n -> SAM_n + pi_n + PPI_n               | SPBC14F5.05c               | Redundant reaction in a separate compartment. Deletion of redundant reaction gives lethal phenotype |
| anth_n + prpp_n -> PPI_n + pran_n                           | SPBC16G5.08                | Redundant reaction in a separate compartment. Deletion of redundant reaction gives lethal phenotype |
| 25dhpp_n + h_n + NADPH_n -> 25dhpp_n + NADP_n               | SPBC21C3.10c               | Redundant reaction in a separate compartment. Deletion of redundant reaction gives lethal phenotype |
| ru5pD_m -> db4p_m + FORM_m + h_m                            | SPBC23E6.06c               | Redundant reaction in a separate compartment. Deletion of redundant reaction gives lethal phenotype |
| ru5pD_n -> db4p_n + FORM_n + h_n                            | SPBC23E6.06c               | Redundant reaction in a separate compartment. Deletion of redundant reaction gives lethal phenotype |
| 4r5au_n + db4p_n -> dmlz_n + 2 H2O_n + pi_n                 | SPBC409.13                 | Redundant reaction in a separate compartment. Deletion of redundant reaction gives lethal phenotype |
| 3psme_n -> CHOR_n + pi_n                                    | SPCC1223.14                | Redundant reaction in a separate compartment. Deletion of redundant reaction gives lethal phenotype |
| coa_n + mev-R_n + 2 NADP_n <-> 2 h_n + hmgcoa_n + 2 NADPH_n | SPCC162.09c                | Redundant reaction in a separate compartment. Deletion of redundant reaction gives lethal phenotype |
| coa_r + mev-R_r + 2 NADP_r <-> 2 h_r + hmgcoa_r + 2 NADPH_r | SPCC162.09c                | Redundant reaction in a separate compartment. Deletion of redundant reaction gives lethal phenotype |
| ATP_m + ribflv_m -> ADP_m + fmn_m + h_m                     | SPCC18.16c                 | Redundant reaction in a separate compartment. Deletion of redundant reaction gives lethal phenotype |
| ATP_n + ribflv_n -> ADP_n + fmn_n + h_n                     | SPCC18.16c                 | Redundant reaction in a separate compartment. Deletion of redundant reaction gives lethal phenotype |
| ATP_n + dNAD_n + NH4_n -> amp_n + h_n + NAD_n + PPI_n       | SPCC553.02                 | Redundant reaction in a separate compartment. Deletion of redundant reaction gives lethal phenotype |
| ATP_n + dtmp_n <-> ADP_n + dtdp_n                           | SPCC70.07c                 | Redundant reaction in a separate compartment. Deletion of redundant reaction gives lethal phenotype |
| g1p_n <-> G6p_n                                             | SPBC32F12.10, SPCC1840.05c | Redundant reaction in a separate compartment. Deletion of redundant reaction gives lethal phenotype |
| r1p_n <-> r5p_n                                             | SPBC32F12.10, SPCC1840.05c | Redundant reaction in a separate compartment. Deletion of redundant reaction gives lethal phenotype |
| 25dhpp_m + h_m + H2O_m -> 5aprbu_m + NH4_m                  | SPAC18B11.02c SPCC4G3.16   | Redundant reaction in a separate compartment. Deletion of redundant reaction gives lethal phenotype |
| 25dhpp_n + h_n + H2O_n -> 5aprbu_n + NH4_n                  | SPAC18B11.02c SPCC4G3.16   | Redundant reaction in a separate compartment. Deletion of redundant reaction gives lethal phenotype |
| dmpp_n + IPPP_n -> grdp_n + PPI_n                           | SPBC36.06c, SPAC6F12.13c   | Redundant reaction in a separate compartment. Deletion of redundant reaction gives lethal phenotype |
| grdp_n + IPPP_n -> FRPP_n + PPI_n                           | SPBC36.06c, SPAC6F12.13c   | Redundant reaction in a separate compartment. Deletion of redundant reaction gives lethal phenotype |
| cit_c <-> icit_c                                            | SPAC24C9.06c, SPBP4H10.15  | Redundant reaction in a separate compartment. Deletion of redundant reaction gives lethal phenotype |
| cit_m <-> icit_m                                            | SPAC24C9.06c, SPBP4H10.15  | Redundant reaction in a separate compartment. Deletion of redundant reaction gives lethal phenotype |
| e4p_n + xu5pD_n <-> f6p_n + g3p_n                           | SPBC2G5.05                 | Redundant reaction in a separate compartment. Deletion of redundant reaction gives lethal phenotype |
| r5p_n + xu5pD_n <-> g3p_n + s7p_n                           | SPBC2G5.05                 | Redundant reaction in a separate compartment. Deletion of redundant reaction gives lethal phenotype |
| ru5pD_n <-> xu5pD_n                                         | SPAC31G5.05c               | Redundant reaction in a separate compartment. Deletion of redundant reaction gives lethal phenotype |
| H2O_n + pap_n -> amp_n + pi_n                               | SPCC1753.04                | Redundant reaction in a separate compartment. Deletion of redundant reaction gives lethal phenotype |
| ADP_c + trdrd_c -> dADP_c + H2O_c + trdox_c                 | SPBC25D12.04+SPAC1F7.05    | Gene assignment revised                                                                             |
| ADP_n + trdrd_n -> dADP_n + H2O_n + trdox_n                 | SPBC25D12.04+SPAC1F7.05    | Gene assignment revised                                                                             |
| CDP_c + trdrd_c -> dCDP_c + H2O_c + trdox_c                 | SPBC25D12.04+SPAC1F7.05    | Gene assignment revised                                                                             |
| CDP_n + trdrd_n -> dCDP_n + H2O_n + trdox_n                 | SPBC25D12.04+SPAC1F7.05    | Gene assignment revised                                                                             |

|                                                                       |                         |                                                                            |
|-----------------------------------------------------------------------|-------------------------|----------------------------------------------------------------------------|
| GDP_c + trdrd_c -> dGDP_c + H2O_c + trdox_c                           | SPBC25D12.04+SPAC1F7.05 | Gene assignment revised                                                    |
| GDP_n + trdrd_n -> dGDP_n + H2O_n + trdox_n                           | SPBC25D12.04+SPAC1F7.05 | Gene assignment revised                                                    |
| UDP_c + trdrd_c -> dUDP_c + H2O_c + trdox_c                           | SPBC25D12.04+SPAC1F7.05 | Gene assignment revised                                                    |
| UDP_n + trdrd_n -> dUDP_n + H2O_n + trdox_n                           | SPBC25D12.04+SPAC1F7.05 | Gene assignment revised                                                    |
| 2ahhmd_c + PABA_c -> dhpt_c + PPI_c                                   | SPBC1734.03             | Deletion of other reactions with the same gene results in lethal phenotype |
| 2ahhmd_m + PABA_m -> dhpt_m + PPI_m                                   | SPBC1734.03             | Deletion of other reactions with the same gene results in lethal phenotype |
| 2ahhmp_c + ATP_c -> 2ahhmd_c + amp_c + h_c                            | SPBC1734.03             | Deletion of other reactions with the same gene results in lethal phenotype |
| 2ahhmp_c + PABA_c -> dhpt_c + H2O_c                                   | SPBC1734.03             | Deletion of other reactions with the same gene results in lethal phenotype |
| 2ahhmp_m + ATP_m -> 2ahhmd_m + amp_m + h_m                            | SPBC1734.03             | Deletion of other reactions with the same gene results in lethal phenotype |
| 2ahhmp_m + PABA_m -> dhpt_m + H2O_m                                   | SPBC1734.03             | Deletion of other reactions with the same gene results in lethal phenotype |
| dhnpt_c -> 2ahhmp_c + gcald_c + h_c                                   | SPBC1734.03             | Deletion of other reactions with the same gene results in lethal phenotype |
| dhnpt_m -> 2ahhmp_m + gcald_m + h_m                                   | SPBC1734.03             | Deletion of other reactions with the same gene results in lethal phenotype |
| G6P_c <> f6p_c                                                        | SPBC1604.05             | Deletion of other reactions with the same gene results in lethal phenotype |
| G6P_c <> G6P-B_c                                                      | SPBC1604.05             | Deletion of other reactions with the same gene results in lethal phenotype |
| G6P-B_c <> f6p_c                                                      | SPBC1604.05             | Deletion of other reactions with the same gene results in lethal phenotype |
| 2 dmlz_c -> 4r5au_c + ribflv_c                                        | SPCC1450.13c            | Deletion of other reactions with the same gene results in lethal phenotype |
| 2 dmlz_n -> 4r5au_n + ribflv_n                                        | SPCC1450.13c            | Deletion of other reactions with the same gene results in lethal phenotype |
| ATP_c + gln_c + H2O_c + UTP_c -> ADP_c + CTP_c + glu_c + 2 h_c + pi_c | SPAC10F6.03c            | Deletion of other reactions with the same gene results in lethal phenotype |
| 5pmev_c + ATP_c -> 5dpmev_c + ADP_c                                   | SPAC343.01c             | Deletion of other reactions with the same gene results in lethal phenotype |
| 5pmev_n + ATP_n -> 5dpmev_n + ADP_n                                   | SPAC343.01c             | Deletion of other reactions with the same gene results in lethal phenotype |
| 2 h_n + mlTHF_n + NADPH_n -> 5mTHF_n + NADP_n                         | SPAC56F8.10             | Deletion of other reactions with the same gene results in lethal phenotype |
| CTP_m + h_m + pa_m <> CDPdag_m + PPI_m                                | SPBC13A2.03             | Deletion of other reactions with the same gene results in lethal phenotype |
| 2 accoa_c -> aacoa_c + coa_c                                          | SPBC215.09c             | Deletion of other reactions with the same gene results in lethal phenotype |
| ATP_n + dump_n <> ADP_n + dUDP_n                                      | SPCC1795.05c            | Deletion of other reactions with the same gene results in lethal phenotype |
| ATP_n + ump_n <> ADP_n + UDP_n                                        | SPCC1795.05c            | Deletion of other reactions with the same gene results in lethal phenotype |
| amp_c + ATP_c <> 2 ADP_c                                              | SPAC4G9.03              | Deletion of other reactions with the same gene results in lethal phenotype |
| amp_c + GTP_c <> ADP_c + GDP_c                                        | SPAC4G9.03              | Deletion of other reactions with the same gene results in lethal phenotype |
| amp_c + itp_c <> ADP_c + idp_c                                        | SPAC4G9.03              | Deletion of other reactions with the same gene results in lethal phenotype |
| amp_m + ATP_m <> 2 ADP_m                                              | SPAC4G9.03              | Deletion of other reactions with the same gene results in lethal phenotype |
| amp_m + GTP_m <> ADP_m + GDP_m                                        | SPAC4G9.03              | Deletion of other reactions with the same gene results in lethal phenotype |
| amp_m + itp_m <> ADP_m + idp_m                                        | SPAC4G9.03              | Deletion of other reactions with the same gene results in lethal phenotype |
| amp_n + ATP_n <> 2 ADP_n                                              | SPAC4G9.03              | Deletion of other reactions with the same gene results in lethal phenotype |
| amp_n + GTP_n <> ADP_n + GDP_n                                        | SPAC4G9.03              | Deletion of other reactions with the same gene results in lethal phenotype |
| amp_n + itp_n <> ADP_n + idp_n                                        | SPAC4G9.03              | Deletion of other reactions with the same gene results in lethal phenotype |
| ATP_c + mev-R_c -> 5pmev_c + ADP_c + h_c                              | SPAC13G6.11c            | Deletion of other reactions with the same gene results in lethal phenotype |
| ATP_n + mev-R_n -> 5pmev_n + ADP_n + h_n                              | SPAC13G6.11c            | Deletion of other reactions with the same gene results in lethal phenotype |
| CTP_c + mev-R_c -> 5pmev_c + CDP_c + h_c                              | SPAC13G6.11c            | Deletion of other reactions with the same gene results in lethal phenotype |
| CTP_n + mev-R_n -> 5pmev_n + CDP_n + h_n                              | SPAC13G6.11c            | Deletion of other reactions with the same gene results in lethal phenotype |
| GTP_c + mev-R_c -> 5pmev_c + GDP_c + h_c                              | SPAC13G6.11c            | Deletion of other reactions with the same gene results in lethal phenotype |
| GTP_n + mev-R_n -> 5pmev_n + GDP_n + h_n                              | SPAC13G6.11c            | Deletion of other reactions with the same gene results in lethal phenotype |
| UTP_c + mev-R_c -> 5pmev_c + UDP_c + h_c                              | SPAC13G6.11c            | Deletion of other reactions with the same gene results in lethal phenotype |
| UTP_n + mev-R_n -> 5pmev_n + UDP_n + h_n                              | SPAC13G6.11c            | Deletion of other reactions with the same gene results in lethal phenotype |
| ATP_c + NH4_c + UTP_c -> ADP_c + CTP_c + 2 h_c + pi_c                 | SPAC10F6.03c            | Deletion of other reactions with the same gene results in lethal phenotype |
| 2 h_m + mlTHF_m + NADPH_m -> 5mTHF_m + NADP_m                         | SPAC56F8.10             | Deletion of other reactions with the same gene results in lethal phenotype |
| CTP_c + h_c + pa_c <> CDPdag_c + PPI_c                                | SPBC13A2.03             | Deletion of other reactions with the same gene results in lethal phenotype |
| 2 accoa_m -> aacoa_m + coa_m                                          | SPBC215.09c             | Deletion of other reactions with the same gene results in lethal phenotype |

|                                                                                                     |                           |                                                                                                                             |
|-----------------------------------------------------------------------------------------------------|---------------------------|-----------------------------------------------------------------------------------------------------------------------------|
| e4p_c + xu5pD_c <> f6p_c + g3p_c                                                                    | SPBC2G5.05                | Deletion of other reactions with the same gene results in lethal phenotype                                                  |
| r5p_c + xu5pD_c <> g3p_c + s7p_c                                                                    | SPBC2G5.05                | Deletion of other reactions with the same gene results in lethal phenotype                                                  |
| 5pmev_m + ATP_m -> 5dpmev_m + ADP_m                                                                 | SPAC343.01c               | Deletion of other reactions with the same gene results in lethal phenotype                                                  |
| ATP_c + dump_c <> ADP_c + dUDP_c                                                                    | SPCC1795.05c              | Deletion of other reactions with the same gene results in lethal phenotype                                                  |
| H2O_c + PPI_c -> h_c + 2 pi_c                                                                       | SPAC23C11.05 SPAC3A12.02  | Removed alternate reaction found in Mitochondria and added exchange flux for diphosphate between mitochondria and cytoplasm |
| 2 h_c + mlTHF_c + NADPH_c -> 5mTHF_c + NADP_c                                                       | SPAC56F8.10, SPAC343.10   | Deletion of other reactions encoded by SPAC56F8.10 results in lethal phenotype.                                             |
| 2 h_c + mlTHF_c + NADPH_c -> 5mTHF_c + NADP_c                                                       | SPAC56F8.10, SPAC343.10   | Deletion of other reactions encoded by SPAC56F8.10 results in lethal phenotype.                                             |
| 2 h_r + lanost_r + 3 NADPH_r + 3 O2_r -> 44mctr_r + FORM_r + 4 H2O_r + 3 NADP_r                     | SPAC13A11.02c             | Pathway connected to the rest of the metabolic network                                                                      |
| 2 h_c + lanost_c + 3 NADPH_c + 3 O2_c -> 44mctr_c + FORM_c + 4 H2O_c + 3 NADP_c                     | SPAC13A11.02c             | Pathway connected to the rest of the metabolic network                                                                      |
| Ssq23epx_c -> lanost_c                                                                              | SPAC13G7.01c              | Pathway connected to the rest of the metabolic network                                                                      |
| Ssq23epx_r -> lanost_r                                                                              | SPAC13G7.01c              | Pathway connected to the rest of the metabolic network                                                                      |
| 44mctr_r + h_r + NADPH_r -> 44mzym_r + NADP_r                                                       | SPBC16G5.18               | Pathway connected to the rest of the metabolic network                                                                      |
| 44mzym_r + 3 h_r + 3 NADPH_r + 3 O2_r -> 4mzym_int1_r + 4 H2O_r + 3 NADP_r                          | SPAC630.08c               | Pathway connected to the rest of the metabolic network                                                                      |
| 4mzym_int1_c + NAD_c -> 4mzym_int2_c + CO2_c + h_c + NADH_c                                         | SPBC3F6.02c               | Pathway connected to the rest of the metabolic network                                                                      |
| 4mzym_int1_g + NAD_g -> 4mzym_int2_g + CO2_g + h_g + NADH_g                                         | SPBC3F6.02c               | Pathway connected to the rest of the metabolic network                                                                      |
| 4mzym_int1_r + NAD_r -> 4mzym_int2_r + CO2_r + h_r + NADH_r                                         | SPBC3F6.02c               | Pathway connected to the rest of the metabolic network                                                                      |
| 4mzym_int2_r + h_r + NADPH_r -> 4mzym_r + NADP_r                                                    | SPBC1709.07               | Pathway connected to the rest of the metabolic network                                                                      |
| 4mzym_r + 3 h_r + 3 NADPH_r + 3 O2_r -> zym_int1_r + 4 H2O_r + 3 NADP_r                             | SPAC630.08c               | Pathway connected to the rest of the metabolic network                                                                      |
| NAD_g + zym_int1_g -> CO2_g + h_g + NADH_g + zym_int2_g                                             | SPBC3F6.02c               | Pathway connected to the rest of the metabolic network                                                                      |
| NAD_r + zym_int1_r -> CO2_r + h_r + NADH_r + zym_int2_r                                             | SPBC3F6.02c               | Pathway connected to the rest of the metabolic network                                                                      |
| zym_int2_r + h_r + NADPH_r -> zymst_r + NADP_r                                                      | SPBC1709.07               | Pathway connected to the rest of the metabolic network                                                                      |
| SAM_n + zymst_n -> SAH_n + fecost_n + h_n                                                           | SPBC16E9.05               | Pathway connected to the rest of the metabolic network                                                                      |
| SAM_r + zymst_r -> SAH_r + fecost_r + h_r                                                           | SPBC16E9.05               | Pathway connected to the rest of the metabolic network                                                                      |
| 2 FRPP_r + h_r + NADPH_r -> NADP_r + 2 PPI_r + sql_r                                                | SPBC646.05c               | Pathway connected to the rest of the metabolic network                                                                      |
| h_r + NADH_r + O2_r + sql_r -> Ssq23epx_r + H2O_r + NAD_r                                           | SPBC713.12                | Pathway connected to the rest of the metabolic network                                                                      |
| h_r + NADPH_r + O2_r + sql_r -> Ssq23epx_r + H2O_r + NADP_r                                         | SPBC713.12                | Pathway connected to the rest of the metabolic network                                                                      |
| dhap_c + 0.141 C160ACP_c + 0.015 C161ACP_c + 0.043 C180ACP_c + 0.801 C181ACP_c -> Iagly3p_c + ACP_c | SPBC1718.04               | Pathway connected to the rest of the metabolic network                                                                      |
| glyc3p_c + 0.141 C160ACP_c + 0.015 C161ACP_c + 0.043 C180ACP_c + 0.801 C181ACP_c -> Iag3p_c + ACP_c | SPBC1718.04               | Pathway connected to the rest of the metabolic network                                                                      |
| man1p_c <> man6p_c                                                                                  | SPAC1556.07               | Pathway connected to the rest of the metabolic network                                                                      |
| man1p_n <> man6p_n                                                                                  | SPAC1556.07               | Pathway connected to the rest of the metabolic network                                                                      |
| dolp_c + GDPmann_c -> dolmanp_r + GDP_c                                                             | SPAC31G5.16c SPBC21B10.11 | Pathway connected to the rest of the metabolic network                                                                      |
| man6p_c <> f6p_c                                                                                    | SPBC1677.02               | Pathway connected to the rest of the metabolic network                                                                      |
| man6p_n <> f6p_n                                                                                    | SPBC2G2.16                | Pathway connected to the rest of the metabolic network                                                                      |
| GTP_c + h_c + man1p_c -> GDPmann_c + PPI_c                                                          | SPBC2G2.16                | Pathway connected to the rest of the metabolic network                                                                      |
| gly_m + h_m + succoa_m -> 5aop_m + CO2_m + coa_m                                                    | SPCC1906.01               | Pathway connected to the rest of the metabolic network                                                                      |
| hmbil_c -> H2O_c + uppg3_c                                                                          | SPAC2F3.09                | Pathway linked to biomass by adding hemeA                                                                                   |
| hmbil_n -> H2O_n + uppg3_n                                                                          | SPAC31G5.08               | Pathway linked to biomass by adding hemeA                                                                                   |
| cp3pg3_c + 2 h_c + O2_c -> 2 CO2_c + 2 H2O_c + pppg9_c                                              | SPAC31G5.08               | Pathway linked to biomass by adding hemeA                                                                                   |
| cp3pg3_m + 2 h_m + O2_m -> 2 CO2_m + 2 H2O_m + pppg9_m                                              | SPAC222.11                | Pathway linked to biomass by adding hemeA                                                                                   |
| cp3pg3_n + 2 h_n + O2_n -> 2 CO2_n + 2 H2O_n + pppg9_n                                              | SPAC222.11                | Pathway linked to biomass by adding hemeA                                                                                   |
| fe2_c + ppp9_c -> 2 h_c + pheme_c                                                                   | SPCC320.09                | Pathway linked to biomass by adding hemeA                                                                                   |
| fe2_m + ppp9_m -> 2 h_m + pheme_m                                                                   | SPCC320.09                | Pathway linked to biomass by adding hemeA                                                                                   |
| fe2_n + ppp9_n -> 2 h_n + pheme_n                                                                   | SPCC320.09                | Pathway linked to biomass by adding hemeA                                                                                   |
| hemeO_m + NADH_m + O2_m -> H2O_m + hemeA_m + NAD_m                                                  | SPAC22E12.10c             | Pathway linked to biomass by adding hemeA                                                                                   |
| thr_m -> 2obut_m + NH4_m                                                                            | SPBC1677.03c              | Alternate metabolic reaction found in cytoplasm. Deletion of both reactions give lethal phenotype                           |
| r5p_c <> ru5pD_c                                                                                    | SPAC144.12                | Deletion of other reactions with the same gene results in lethal phenotype                                                  |
| ru5pD_c <> xu5pD_c                                                                                  | SPAC31G5.05c              | Deletion of other reactions with the same gene results in lethal phenotype                                                  |
| ADP_c + h_c + pep_c -> ATP_c + PYR_c                                                                | SPAC4H3.10c               | Deletion of other reactions with the same gene results in lethal phenotype                                                  |
| accoa_m + ATP_m + hco3_m <> ADP_m + h_m + malcoa_m + pi_m                                           | SPAC56E4.04c              | Deletion of other reactions with the same gene results in lethal phenotype                                                  |
| CDPdag_c + ser_c <> cmp_c + h_c + ps_c                                                              | SPCC1442.12               | Deletion of other reactions with the same gene results in lethal phenotype                                                  |
| H2O_c + pap_c -> amp_c + pi_c                                                                       | SPCC1753.04               | Deletion of other reactions with the same gene results in lethal phenotype                                                  |
| ATP_c + thm_c -> amp_c + h_c + thmpp_c                                                              | SPAC6F12.05c              | Deletion of other reactions with the same gene results in lethal phenotype                                                  |
| ATP_c + thmpp_c -> ADP_c + thmtp_c                                                                  | SPAC6F12.05c              | Deletion of other reactions with the same gene results in lethal phenotype                                                  |
| dATP_c + gmp_c <> dADP_c + GDP_c                                                                    | SPBC1198.05               | Deletion of other reactions with the same gene results in lethal phenotype                                                  |
| ATP_c + gmp_c <> ADP_c + GDP_c                                                                      | SPBC1198.05               | Deletion of other reactions with the same gene results in lethal phenotype                                                  |
| ATP_c + f6p_c -> ADP_c + fdp_c + h_c                                                                | SPBC16H5.02               | Deletion of other reactions with the same gene results in lethal phenotype                                                  |
| ATP_c + s7p_c -> ADP_c + h_c + s17bp_c                                                              | SPBC16H5.02               | Deletion of other reactions with the same gene results in lethal phenotype                                                  |
| ATP_c + tag6pD_c -> ADP_c + h_c + taGDPD_c                                                          | SPBC16H5.02               | Deletion of other reactions with the same gene results in lethal phenotype                                                  |
| 6pgc_c + NADP_c -> CO2_c + NADPH_c + ru5pD_c                                                        | SPBC660.16                | Deletion of other reactions with the same gene results in lethal phenotype                                                  |
| 6pgc_m + NADP_m -> CO2_m + NADPH_m + ru5pD_m                                                        | SPBC660.16                | Deletion of other reactions with the same gene results in lethal phenotype                                                  |
| ATP_c + 0.01 ptd1ino_c -> ADP_c + h_c + 0.01 ptd3ino_c                                              | SPBC216.07c SPBC30D10.10C | Unreconciled                                                                                                                |
| f1p_c <> dhap_c + glyald_c                                                                          | SPBC19C2.07               | Unreconciled                                                                                                                |
| f1p_n <> dhap_n + glyald_n                                                                          | SPBC19C2.07               | Unreconciled                                                                                                                |

|                                                           |                                                                   |                                                                 |
|-----------------------------------------------------------|-------------------------------------------------------------------|-----------------------------------------------------------------|
| fdp_c <<> dhap_c + g3p_c                                  | SPBC19C2.07                                                       | Unreconciled                                                    |
| fdp_n <<> dhap_n + g3p_n                                  | SPBC19C2.07                                                       | Unreconciled                                                    |
| s17bp_c <<> dhap_c + e4p_c                                | SPBC19C2.07                                                       | Unreconciled                                                    |
| s17bp_n <<> dhap_n + e4p_n                                | SPBC19C2.07                                                       | Unreconciled                                                    |
| glp_c + C140coa_c -> coa_c + tglp_c                       | SPBC2G2.11                                                        | Unreconciled                                                    |
| h_m + nac_m + prpp_m -> nicrnt_m + PPI_m                  | SPAC1486.06                                                       | Unreconciled                                                    |
| h_n + nac_n + prpp_n -> nicrnt_n + PPI_n                  | SPAC1486.06                                                       | Unreconciled                                                    |
| CTP_r + dolichol_r -> CDP_r + dolp_r + h_r                | SPCC63.10c                                                        | Unreconciled                                                    |
| ATP_c + mi13456p_c -> ADP_c + ppmi1346p_c                 | SPCC970.08                                                        | No flux observed                                                |
| ATP_c + minohp_c -> ADP_c + ppmi12346p_c                  | SPCC970.08                                                        | No flux observed                                                |
| ATP_c + 0.01 ptd4ino_c -> ADP_c + h_c + 0.01 ptd145bp_c   | SPAC19G12.14                                                      | No flux observed                                                |
| cmp_m + CTP_c + 2 h_c -> cmp_c + CTP_m + 2 h_m            | SPAC688.09                                                        | No flux observed                                                |
| 2 h_c + ump_m + UTP_c -> 2 h_m + ump_c + UTP_m            | SPAC688.09                                                        | No flux observed                                                |
| GDPmann_c + gmp_g -> GDPmann_g + gmp_c                    | SPAC144.18                                                        | No flux observed                                                |
| 2 focyte_m + H2O_m -> 2 ficyte_m + 2 H2O_m                | SPCC191.07                                                        | No flux observed                                                |
| cer124_g + 0.01 ptdlino_g -> 0.01 12dgr_g + 0.01 ipc124_g | SPAC3H8.06                                                        | No flux observed                                                |
| cer126_g + 0.01 ptdlino_g -> 0.01 12dgr_g + 0.01 ipc126_g | SPAC3H8.06                                                        | No flux observed                                                |
| cer224_g + 0.01 ptdlino_g -> 0.01 12dgr_g + 0.01 ipc224_g | SPAC3H8.06                                                        | No flux observed                                                |
| cer226_g + 0.01 ptdlino_g -> 0.01 12dgr_g + 0.01 ipc226_g | SPAC3H8.06                                                        | No flux observed                                                |
| cer324_g + 0.01 ptdlino_g -> 0.01 12dgr_g + 0.01 ipc324_g | SPAC3H8.06                                                        | No flux observed                                                |
| cer326_g + 0.01 ptdlino_g -> 0.01 12dgr_g + 0.01 ipc326_g | SPAC3H8.06                                                        | No flux observed                                                |
| ATP_n + mi1345p_n -> ADP_n + h_n + mi13456p_n             | SPAC607.04                                                        | No flux observed                                                |
| ATP_n + mi1456p_n -> ADP_n + h_n + mi13456p_n             | SPAC607.04                                                        | No flux observed                                                |
| ATP_n + mi145p_n -> ADP_n + h_n + mi1345p_n               | SPAC607.04                                                        | No flux observed                                                |
| ATP_n + mi145p_n -> ADP_n + h_n + mi1456p_n               | SPAC607.04                                                        | No flux observed                                                |
| ATP_c + btn_c + h_c -> btamp_c + PPI_c                    | SPBC30D10.07c                                                     | No flux observed                                                |
| ALA_c <<> dALA_c                                          | SPBC359.02                                                        | No flux observed                                                |
| DHF_c + h_c + NADPH_c -> NADP_c + THF_c                   | SPCC1223.08c                                                      | No flux observed                                                |
| DHF_m + h_m + NADPH_m -> NADP_m + THF_m                   | SPCC1223.08c                                                      | No flux observed                                                |
| 2 ficyte_c + dLAC_c -> 2 focyte_c + PYR_c                 | SPCC191.07                                                        | No flux observed                                                |
| 2 ficyte_m + dLAC_m -> 2 focyte_m + PYR_m                 | SPCC191.07                                                        | No flux observed                                                |
| 2 ficyte_n + dLAC_n -> 2 focyte_n + PYR_n                 | SPCC191.07                                                        | No flux observed                                                |
| 2 ficyte_m + LAC_c -> 2 focyte_m + PYR_c                  | SPCC191.07 SPAPB1A11.03                                           | No flux observed                                                |
| adn_c + H2O_c -> ade_c + ribD_c                           | SPAC17G8.02                                                       | No flux observed                                                |
| adn_n + H2O_n -> ade_n + ribD_n                           | SPAC17G8.02                                                       | No flux observed                                                |
| gsn_c + H2O_c -> gua_c + ribD_c                           | SPAC17G8.02                                                       | No flux observed                                                |
| gsn_n + H2O_n -> gua_n + ribD_n                           | SPAC17G8.02                                                       | No flux observed                                                |
| ATP_c + glcD_c -> ADP_c + G6P-B_c + h_c                   | SPAC4F8.07c                                                       | No flux observed                                                |
| ATP_n + glcD_n -> ADP_n + G6P-B_n + h_n                   | SPAC4F8.07c                                                       | No flux observed                                                |
| dUTP_c + H2O_c -> dump_c + h_c + PPI_c                    | SPAC644.05c                                                       | No flux observed                                                |
| dUTP_n + H2O_n -> dump_n + h_n + PPI_n                    | SPAC644.05c                                                       | No flux observed                                                |
| H2O_r + psph1p_r -> pi_r + psphings_r                     | SPAC823.11                                                        | No flux observed                                                |
| H2O_r + sph1p_r -> pi_r + sphgn_r                         | SPAC823.11                                                        | No flux observed                                                |
| 1p3h5c_c + 2 h_c + NADH_c -> 4hpro-LT_c + NAD_c           | SPAPYUG7.05                                                       | No flux observed                                                |
| 1p3h5c_c + 2 h_c + NADPH_c -> 4hpro-LT_c + NADP_c         | SPAPYUG7.05                                                       | No flux observed                                                |
| 1pyr5c_c + 2 h_c + NADPH_c -> NADP_c + PRO_c              | SPAPYUG7.05                                                       | No flux observed                                                |
| ATP_n + dgm_p_n <<> ADP_n + dGDP_n                        | SPBC1198.05                                                       | No flux observed                                                |
| ATP_n + gmp_n <<> ADP_n + GDP_n                           | SPBC1198.05                                                       | No flux observed                                                |
| dATP_n + gmp_n <<> dADP_n + GDP_n                         | SPBC1198.05                                                       | No flux observed                                                |
| H2O_c + q6_m + spmd_c -> 13dampp_c + 4abutn_c + q6h2_m    | SPBC1271.04c                                                      | No flux observed                                                |
| H2O_n + q6_m + spmd_n -> 13dampp_n + 4abutn_n + q6h2_m    | SPBC1271.04c                                                      | No flux observed                                                |
| f6p_c + gln_c -> gam6p_c + glu_c                          | SPBC12C2.11                                                       | No flux observed                                                |
| ser_c -> NH4_c + PYR_c                                    | SPBC1677.03c                                                      | No flux observed                                                |
| ATP_n + glu_n + THF_n <<> ADP_n + h_n + pi_n + THFglu_n   | SPBC1709.17                                                       | No flux observed                                                |
| ade_c + h_c + H2O_c -> h_xan_c + NH4_c                    | SPBC1198.02                                                       | No flux observed                                                |
| ade_n + h_n + H2O_n -> h_xan_n + NH4_n                    | SPBC1198.02                                                       | No flux observed                                                |
| adn_c + h_c + H2O_c -> ins_c + NH4_c                      | SPBC1198.02                                                       | No flux observed                                                |
| adn_n + h_n + H2O_n -> ins_n + NH4_n                      | SPBC1198.02                                                       | No flux observed                                                |
| gthox_c + h_c + NADPH_c -> 2 gthrd_c + NADP_c             | SPBC17A3.07, SPAC4F10.20, SPAC15E1.09, SPBC26H8.06                | Both viable and lethal genes associated - Removed from analysis |
| gthox_n + h_c + NADPH_n -> 2 gthrd_n + NADP_n             | SPBC17A3.07, SPAC4F10.20, SPAC15E1.09, SPBC26H8.06                | Both viable and lethal genes associated - Removed from analysis |
| G6p_c + NADP_c -> 6pgl_c + h_c + NADPH_c                  | SPCC794.01c, SPAC3C7.13c, SPAC3A12.18                             | Both viable and lethal genes associated - Removed from analysis |
| dad_c + h_c + H2O_c -> din_c + NH4_c                      | SPBC1683.02, SPBC1198.02                                          | Both viable and lethal genes associated - Removed from analysis |
| dad_n + h_n + H2O_n -> din_n + NH4_n                      | SPBC1683.02, SPBC1198.02                                          | Both viable and lethal genes associated - Removed from analysis |
| h_c + C160coa_c + ser_c -> 3dsphgn_c + CO2_c + coa_c      | SPAC21E11.08+SPBC18E5.02c                                         | Both viable and lethal genes associated - Removed from analysis |
| h_r + C160coa_r + ser_r -> 3dsphgn_r + CO2_r + coa_r      | SPAC21E11.08+SPBC18E5.02c                                         | Both viable and lethal genes associated - Removed from analysis |
| ATP_c + glu_c + THF_c <<> ADP_c + h_c + pi_c + THFglu_c   | SPAC227.09, SPBC1709.17                                           | Both viable and lethal genes associated - Removed from analysis |
| ATP_m + glu_m + THF_m <<> ADP_m + h_m + pi_m + THFglu_m   | SPAC227.09, SPBC1709.17                                           | Both viable and lethal genes associated - Removed from analysis |
| 13dpg_c <<> 23dpg_c + h_c                                 | SPAC26F1.06, SPAC1687.21                                          | Both viable and lethal genes associated - Removed from analysis |
| 13dpg_n <<> 23dpg_n + h_n                                 | SPAC26F1.06, SPAC1687.21                                          | Both viable and lethal genes associated - Removed from analysis |
| H2O2_c + trdrd_c -> 2 H2O_c + trdox_c                     | SPCC576.03c SPAC7D4.07c                                           | Both viable and lethal genes associated - Removed from analysis |
| UDPg_c -> 16BDglen_c + h_c + UDP_c                        | SPAC23H3.11c, SPAC17G6.11c                                        | Both viable and lethal genes associated - Removed from analysis |
| g1p_c + h_c + UTP_c <<> PPI_c + UDPg_c                    | SPCC794.10, SPCC1322.04                                           | Both viable and lethal genes associated - Removed from analysis |
| g1p_n + h_n + UTP_n <<> PPI_n + UDPg_n                    | SPCC794.10, SPCC1322.04                                           | Both viable and lethal genes associated - Removed from analysis |
| dhlam_m + NAD_m -> h_m + lpam_m + NADH_m                  | SPBC3H7.03c, SPAC1002.09c, SPBC776.15c                            | Both viable and lethal genes associated - Removed from analysis |
| coa_m + NAD_m + PYR_m -> accoa_m + CO2_m + NADH_m         | SPAC1002.09c, SPCC794.07, SPBC30D10.13c+SPAC26F1.03, SPCC1259.09c | Both viable and lethal genes associated - Removed from analysis |
| C160ACP_c + H2O_c <<> ACP_c + h_c + C160_c                | SPAC926.09c+ SPAC4A8.11c                                          | Both viable and lethal genes associated - Removed from analysis |
| C161ACP_c + H2O_c <<> ACP_c + h_c + C161_c                | SPAC926.09c+ SPAC4A8.11c                                          | Both viable and lethal genes associated - Removed from analysis |
| C180ACP_c + H2O_c <<> ACP_c + h_c + C180_c                | SPAC926.09c+ SPAC4A8.11c                                          | Both viable and lethal genes associated - Removed from analysis |
| C181ACP_c + H2O_c <<> ACP_c + h_c + C181_c                | SPAC926.09c+ SPAC4A8.11c                                          | Both viable and lethal genes associated - Removed from analysis |
| ACP_c + accoa_c <<> acACP_c + coa_c                       | SPBC1105.15c SPAC4H3.09 SPAC3G9.02 SPAC11G7.05c                   | Both viable and lethal genes associated - Removed from analysis |



**Supporting Information 4B: List of False negative predictions from single knockout simulation using SpoMBEL1706**

| Metabolic reactions                                                                             | Genes                                                                                                                  | False negative reconciliation                                                                                                                  |
|-------------------------------------------------------------------------------------------------|------------------------------------------------------------------------------------------------------------------------|------------------------------------------------------------------------------------------------------------------------------------------------|
| aps_c + ATP_c -> ADP_c + h_c + paps_c                                                           | SPAC1782.11                                                                                                            | Lethal mutation if sulfate is used as sulfur source                                                                                            |
| ATP_c + h_c + so4_c -> aps_c + PPi_c                                                            | SPBC27.08c                                                                                                             | Lethal mutation if sulfate is used as sulfur source                                                                                            |
| paps_c + trdrd_c -> 2 h_c + pap_c + so3_c + trdox_c                                             | SPAC13G7.06                                                                                                            | Lethal mutation if sulfate is used as sulfur source                                                                                            |
| ac_c + ATP_c + coa_c -> accoa_c + amp_c + PPi_c                                                 | SPCC191.02c                                                                                                            | Added reversible accoa transporter between Cytosol and Mitochondria                                                                            |
| 1ag3p_c + 0.141 C160ACP_c + 0.015 C161ACP_c + 0.043 C180ACP_c + 0.801 C181ACP_c -> pa_c + ACP_c | SPAC1851.02                                                                                                            | Unreconciled                                                                                                                                   |
| dump_c + mlTHF_c -> DHF_c + dtmp_c                                                              | SPAC15E1.04                                                                                                            | Unreconciled                                                                                                                                   |
| ATP_c + prpp_c -> PPi_c + prbATP_c                                                              | SPAC25G10.05c                                                                                                          | Unreconciled                                                                                                                                   |
| prfp_c -> prlp_c                                                                                | SPAC3F10.09                                                                                                            | Unreconciled                                                                                                                                   |
| dhor-S_c + q6_m -> orot_c + q6h2_m                                                              | SPAC57A10.12c                                                                                                          | Unreconciled                                                                                                                                   |
| ATP_c + UDP_c <-> ADP_c + UTP_c                                                                 | SPAC806.07                                                                                                             | Unreconciled                                                                                                                                   |
| ATP_c + dtdp_c <-> ADP_c + dttp_c                                                               | SPAC806.07                                                                                                             | Unreconciled                                                                                                                                   |
| dhpmp_c + H2O_c -> dhnt_c + pi_c                                                                | SPBC14F5.13c                                                                                                           | Unreconciled                                                                                                                                   |
| adcho_c -> PABA_c + h_c + PYR_c                                                                 | SPBC19G7.02                                                                                                            | Unreconciled                                                                                                                                   |
| SAM_c + 0.01 pe_c -> SAH_c + h_c + 0.01 ptdmeeta_c                                              | SPBC26H8.03                                                                                                            | Unreconciled                                                                                                                                   |
| SAM_c + 0.01 ptdmeeta_c -> SAH_c + h_c + 0.01 ptd2meeta_c                                       | SPBC337.16                                                                                                             | Unreconciled                                                                                                                                   |
| SAM_c + ptd2meeta_c -> SAH_c + h_c + pe_c                                                       | SPBC337.16                                                                                                             | Unreconciled                                                                                                                                   |
| L2aADP6sa_c + glu_c + h_c + NADPH_c <-> H2O_c + NADP_c + saccrp_c                               | SPBC3B8.03                                                                                                             | Unreconciled                                                                                                                                   |
| 12dgr_c + pc_c -> 1agpc_c + triglyc_c                                                           | SPBC776.14                                                                                                             | Unreconciled                                                                                                                                   |
| H2O_c + meTHF_c <-> 10fTHF_c + h_c                                                              | SPBC839.16                                                                                                             | Unreconciled                                                                                                                                   |
| accoa_m + akg_m + H2O_m -> coa_m + h_m + hcit_m                                                 | SPBC1105.02c                                                                                                           | Unreconciled                                                                                                                                   |
| ATP_c + fmn_c + h_c -> fad_c + PPi_c                                                            | SPCC1235.04c                                                                                                           | Unreconciled                                                                                                                                   |
| ATP_c + NAD_c -> ADP_c + h_c + NADP_c                                                           | SPCC24B10.02c                                                                                                          | Unreconciled                                                                                                                                   |
| 10fTHF_c + aicar_c <-> faicar_c + THF_c                                                         | SPCPB16A4.03c                                                                                                          | Unreconciled                                                                                                                                   |
| H2O_c + imp_c <-> faicar_c                                                                      | SPCPB16A4.03c                                                                                                          | Unreconciled                                                                                                                                   |
| dmpp_c + IPPP_c -> grdp_c + PPi_c                                                               | SPBC36.06c (V),<br>SPAC6F12.13c (L)<br>SPAC24C9.07c (V),<br>SPBC19G7.05c (L),<br>SPCC1840.02c (L),<br>SPAC19B12.03 (L) | Both viable and lethal genes associated - Removed from analysis                                                                                |
| UDPg_c -> 13BDglen_c + h_c + UDP_c                                                              | SPAC18B11.02c (V),<br>SPCC4G3.16 (L)                                                                                   | Both viable and lethal genes associated - Removed from analysis                                                                                |
| 25dthpp_c + h_c + H2O_c -> 5aprbu_c + NH4_c                                                     | SPBC36.06c (V),<br>SPAC6F12.13c (L)                                                                                    | Both viable and lethal genes associated - Removed from analysis                                                                                |
| grdp_c + IPPP_c -> FRPP_c + PPi_c                                                               | SPBC32F12.10 (L),<br>SPCC1840.05c (V)                                                                                  | Both viable and lethal genes associated - Removed from analysis                                                                                |
| glp_c <-> G6P_c                                                                                 | SPCC1620.06c (L),<br>SPAC4A8.14 (V),<br>SPBC3D6.06c (V)                                                                | Both viable and lethal genes associated - Removed from analysis                                                                                |
| ATP_c + r5p_c <-> amp_c + h_c + prpp_c                                                          | SPAC56E4.04c (L),<br>SPAC926.09c (V)+SPAC4A8.11c (L)                                                                   | Both viable and lethal genes associated - Removed from analysis                                                                                |
| accoa_c + 9 h_c + 3 malcoa_c + 6 NADPH_c -> 3 CO2_c + 3 coa_c + 3 H2O_c + 6 NADP_c + C080coa_c  | SPAC56E4.04c (L),<br>SPAC926.09c (V)+SPAC4A8.11c (L)                                                                   | Both viable and lethal genes associated - Removed from analysis                                                                                |
| C080coa_c + 3 h_c + malcoa_c + 2 NADPH_c -> CO2_c + coa_c + H2O_c + 2 NADP_c + C100coa_c        | SPAC56E4.04c (L),<br>SPAC926.09c (V)+SPAC4A8.11c (L)                                                                   | Both viable and lethal genes associated - Removed from analysis                                                                                |
| C100_c + 3 h_c + malcoa_c + 2 NADPH_c -> CO2_c + coa_c + H2O_c + 2 NADP_c + C120_c              | SPAC56E4.04c (L),<br>SPAC926.09c (V)+SPAC4A8.11c (L)                                                                   | Both viable and lethal genes associated - Removed from analysis                                                                                |
| C100coa_c + 3 h_c + malcoa_c + 2 NADPH_c -> CO2_c + coa_c + H2O_c + 2 NADP_c + C120coa_c        | SPAC56E4.04c (L),<br>SPAC926.09c (V)+SPAC4A8.11c (L)                                                                   | Both viable and lethal genes associated - Removed from analysis                                                                                |
| C120_c + 3 h_c + malcoa_c + 2 NADPH_c -> CO2_c + coa_c + H2O_c + 2 NADP_c + C140_c              | SPAC56E4.04c (L),<br>SPAC926.09c (V)+SPAC4A8.11c (L)<br>SPAC24H6.11C                                                   | Both viable and lethal genes associated - Removed from analysis                                                                                |
| so4_e -> so4_c                                                                                  | SPCC320.05<br>SPBC3H7.02<br>SPAC869.05C                                                                                | Single gene-mutants are all viable. Deletion of all genes may result in lethal phenotype - Sulfate transporter - Removed from analysis         |
| NH4_e <-> NH4_c                                                                                 | SPCPB1C11.01<br>SPAC664.14                                                                                             | Single gene-mutants are all viable. Deletion of all genes may result in lethal phenotype - Nitrogen source transporter - Removed from analysis |
| 3 H2O_c + h2s_c + 3 NADP_c <-> 5 h_c + 3 NADPH_c + so3_c                                        | SPCC584.01c,<br>SPAC10F6.01c                                                                                           | genes may result in lethal phenotype - Removed from analysis                                                                                   |
| h_m + 2 PYR_m -> alac-S_m + CO2_m                                                               | SPBP35G2.07,<br>SPBC14C8.04                                                                                            | genes may result in lethal phenotype - Removed from analysis                                                                                   |
| C161_c + ATP_c + coa_c <-> amp_c + C161coa_c + PPi_c                                            | SPBP4H10.11c,<br>SPBC18H10.02                                                                                          | genes may result in lethal phenotype - Removed from analysis                                                                                   |
| C181_c + ATP_c + coa_c <-> amp_c + C181coa_c + PPi_c                                            | SPBP4H10.11c,<br>SPBC18H10.02                                                                                          | genes may result in lethal phenotype - Removed from analysis                                                                                   |
| dhap_c + h_c + NADH_c -> glyc3p_c + NAD_c                                                       | SPAC23D3.04c,<br>SPBC215.05                                                                                            | genes may result in lethal phenotype - Removed from analysis                                                                                   |

|                                                                            |                                                                                            |                                                                                                                  |
|----------------------------------------------------------------------------|--------------------------------------------------------------------------------------------|------------------------------------------------------------------------------------------------------------------|
| 2pg_c <-> H2O_c + pep_c                                                    | SPBC1815.01                                                                                | genes may result in lethal phenotype - Removed from analysis                                                     |
| g3p_c + NAD_c + pi_c <-> 13dpg_c + h_c + NADH_c                            | SPBPB21E7.01c                                                                              | genes may result in lethal phenotype - Removed from analysis                                                     |
| IPPP_m + PNPP_m -> HXPP_m + Ppi_m                                          | SPBC32F12.11,<br>SPBC354.12                                                                | genes may result in lethal phenotype - Removed from analysis                                                     |
| H2O_c + prbamp_c -> prfp_c                                                 | SPBPJ4664.01                                                                               | genes may result in lethal phenotype - Removed from analysis                                                     |
| H2O_c + prbATP_c -> h_c + Ppi_c + prbamp_c                                 | SPAC19G12.12                                                                               | genes may result in lethal phenotype - Removed from analysis                                                     |
| 2OMHMB_m + SAM_m -> SAH_m + h_m + q6_m                                     | SPBC29A3.02c                                                                               | genes may result in lethal phenotype - Removed from analysis                                                     |
| 2OPMP_m + O2_m -> 2OPMB_m + H2O_m                                          | SPBC1711.13                                                                                | genes may result in lethal phenotype - Removed from analysis                                                     |
| 2OPMB_m + SAM_m -> 2OPMMB_m + SAH_m + h_m                                  | SPBC29A3.02c                                                                               | genes may result in lethal phenotype - Removed from analysis                                                     |
| 2OPMMB_m + 0.5 O2_m -> 2OMHMB_m                                            | SPBC1711.13                                                                                | genes may result in lethal phenotype - Removed from analysis                                                     |
| 3H45DHBZ_m + SAM_m -> 3H4H5MOBZ_m + SAH_m + h_m                            | SPCC4G3.04c,<br>SPBC337.15c,<br>SPAC19G12.11,<br>SPBC2D10.18,<br>SPBC146.12,<br>SPCC162.05 | Single gene-mutants are all viable. Deletion of all genes may result in lethal phenotype - Removed from analysis |
| acser_c + h2s_c -> ac_c + cys_c + h_c                                      | SPCC4G3.04c,<br>SPBC337.15c,<br>SPAC19G12.11,<br>SPBC2D10.18,<br>SPBC146.12,<br>SPCC162.05 | Single gene-mutants are all viable. Deletion of all genes may result in lethal phenotype - Removed from analysis |
| H2O_c + histd_c + 2 NAD_c -> 3 h_c + his_c + 2 NADH_c                      | SPCC4G3.04c,<br>SPBC337.15c,<br>SPAC19G12.11,<br>SPBC2D10.18,<br>SPBC146.12,<br>SPCC162.05 | Single gene-mutants are all viable. Deletion of all genes may result in lethal phenotype - Removed from analysis |
| 2 ATP_c + gln_c + H2O_c + hco3_c -> 2 ADP_c + cbp_c + glu_c + 2 h_c + pi_c | SPCC4G3.04c,<br>SPBC337.15c,<br>SPAC19G12.11,<br>SPBC2D10.18,<br>SPBC146.12,<br>SPCC162.05 | Single gene-mutants are all viable. Deletion of all genes may result in lethal phenotype - Removed from analysis |
| 2obut_m + h_m + PYR_m -> 2ahbut_m + CO2_m                                  | SPCC4G3.04c,<br>SPBC337.15c,<br>SPAC19G12.11,<br>SPBC2D10.18,<br>SPBC146.12,<br>SPCC162.05 | Single gene-mutants are all viable. Deletion of all genes may result in lethal phenotype - Removed from analysis |
| argsuc_c <-> arg_c + fum_c                                                 | SPCC4G3.04c,<br>SPBC337.15c,<br>SPAC19G12.11,<br>SPBC2D10.18,<br>SPBC146.12,<br>SPCC162.05 | Single gene-mutants are all viable. Deletion of all genes may result in lethal phenotype - Removed from analysis |
| asp_c + cbp_c -> cbasp_c + h_c + pi_c                                      | SPCC4G3.04c,<br>SPBC337.15c,<br>SPAC19G12.11,<br>SPBC2D10.18,<br>SPBC146.12,<br>SPCC162.05 | Single gene-mutants are all viable. Deletion of all genes may result in lethal phenotype - Removed from analysis |
| dhor-S_c + H2O_c <-> cbasp_c + h_c                                         | SPCC4G3.04c,<br>SPBC337.15c,<br>SPAC19G12.11,<br>SPBC2D10.18,<br>SPBC146.12,<br>SPCC162.05 | Single gene-mutants are all viable. Deletion of all genes may result in lethal phenotype - Removed from analysis |
| akg_c + phe_c <-> glu_c + PHPYR_c                                          | SPCC4G3.04c,<br>SPBC337.15c,<br>SPAC19G12.11,<br>SPBC2D10.18,<br>SPBC146.12,<br>SPCC162.05 | Single gene-mutants are all viable. Deletion of all genes may result in lethal phenotype - Removed from analysis |
| 23dhmp_m -> 3mop_m + H2O_m                                                 | SPCC4G3.04c,<br>SPBC337.15c,<br>SPAC19G12.11,<br>SPBC2D10.18,<br>SPBC146.12,<br>SPCC162.05 | Single gene-mutants are all viable. Deletion of all genes may result in lethal phenotype - Removed from analysis |
| ser_c + THF_c <-> gly_c + H2O_c + mTHF_c                                   | SPCC4G3.04c,<br>SPBC337.15c,<br>SPAC19G12.11,<br>SPBC2D10.18,<br>SPBC146.12,<br>SPCC162.05 | Single gene-mutants are all viable. Deletion of all genes may result in lethal phenotype - Removed from analysis |
| 4HBZ_m + HXPP_m -> O4HBZ_m + Ppi_m                                         | SPCC4G3.04c,<br>SPBC337.15c,<br>SPAC19G12.11,<br>SPBC2D10.18,<br>SPBC146.12,<br>SPCC162.05 | Single gene-mutants are all viable. Deletion of all genes may result in lethal phenotype - Removed from analysis |
| h_c + pphn_c -> CO2_c + H2O_c + PHPYR_c                                    | SPCC4G3.04c,<br>SPBC337.15c,<br>SPAC19G12.11,<br>SPBC2D10.18,<br>SPBC146.12,<br>SPCC162.05 | Single gene-mutants are all viable. Deletion of all genes may result in lethal phenotype - Removed from analysis |
| akg_m + ile_m <-> 3mop_m + glu_m                                           | SPCC4G3.04c,<br>SPBC337.15c,<br>SPAC19G12.11,<br>SPBC2D10.18,<br>SPBC146.12,<br>SPCC162.05 | Single gene-mutants are all viable. Deletion of all genes may result in lethal phenotype - Removed from analysis |
| akg_c + leu_c <-> 4mop_c + glu_c                                           | SPCC4G3.04c,<br>SPBC337.15c,<br>SPAC19G12.11,<br>SPBC2D10.18,<br>SPBC146.12,<br>SPCC162.05 | Single gene-mutants are all viable. Deletion of all genes may result in lethal phenotype - Removed from analysis |
| 3c4mop_c + h_c -> 4mop_c + CO2_c                                           | SPCC4G3.04c,<br>SPBC337.15c,<br>SPAC19G12.11,<br>SPBC2D10.18,<br>SPBC146.12,<br>SPCC162.05 | Single gene-mutants are all viable. Deletion of all genes may result in lethal phenotype - Removed from analysis |
| akg_m + val_m <-> 3mob_m + glu_m                                           | SPCC4G3.04c,<br>SPBC337.15c,<br>SPAC19G12.11,<br>SPBC2D10.18,<br>SPBC146.12,<br>SPCC162.05 | Single gene-mutants are all viable. Deletion of all genes may result in lethal phenotype - Removed from analysis |
|                                                                            | SPAC17G8.06c                                                                               | Potentially dependent on media condition - Removed from analysis                                                 |
|                                                                            | SPAC24C9.12c                                                                               | Potentially dependent on media condition - Removed from analysis                                                 |
|                                                                            | SPAC56F8.04c                                                                               | Potentially dependent on media condition - Removed from analysis                                                 |
|                                                                            | SPBC30D10.16                                                                               | Potentially dependent on media condition - Removed from analysis                                                 |
|                                                                            | SPBC428.02c                                                                                | Potentially dependent on media condition - Removed from analysis                                                 |
|                                                                            | SPBC428.02c                                                                                | Potentially dependent on media condition - Removed from analysis                                                 |
|                                                                            | SPBC428.02c                                                                                | Potentially dependent on media condition - Removed from analysis                                                 |
|                                                                            | SPBC428.02c                                                                                | Potentially dependent on media condition - Removed from analysis                                                 |

|                                                           |               |                                                                  |
|-----------------------------------------------------------|---------------|------------------------------------------------------------------|
| asp_c + ATP_c + citr_c <-> amp_c + argsuc_c + h_c + PPi_c | SPBC428.05c   | Potentially dependent on media condition - Removed from analysis |
| orot5p_c + PPi_c <-> orot_c + prpp_c                      | SPBC725.15    | Potentially dependent on media condition - Removed from analysis |
| H2O_c + NAD_c + sacrcp_c <-> akc_c + h_c + lys_c + NADH_c | SPAC227.18    | Potentially dependent on media condition - Removed from analysis |
| eig3p_c -> H2O_c + imacp_c                                | SPBC21H7.07c  | Potentially dependent on media condition - Removed from analysis |
| hcit_m <-> b124tc_m + H2O_m                               | SPAC343.16    | Potentially dependent on media condition - Removed from analysis |
| 3c2hmp_c <-> 2ippm_c + H2O_c                              | SPAC9E9.03    | Potentially dependent on media condition - Removed from analysis |
| 2ippm_c + H2O_c <-> 3c3hmp_c                              | SPAC9E9.03    | Potentially dependent on media condition - Removed from analysis |
| 3c2hmp_c + NAD_c -> 3c4mop_c + h_c + NADH_c               | SPBC1A4.02c   | Potentially dependent on media condition - Removed from analysis |
| accoa_c + ser_c -> acser_c + coa_c                        | SPAC1039.08   | Potentially dependent on media condition - Removed from analysis |
| alac-S_m + h_m + NADPH_m -> 23dhmb_m + NADP_m             | SPBC56F2.12   | Potentially dependent on media condition - Removed from analysis |
| 2ahbut_m + h_m + NADPH_m -> 23dhmp_m + NADP_m             | SPBC56F2.12   | Potentially dependent on media condition - Removed from analysis |
| 23dhmb_m -> 3mob_m + H2O_m                                | SPBC56F2.12   | Potentially dependent on media condition - Removed from analysis |
| SAH_c + H2O_c -> adn_c + hcys_c                           | SPBC8D2.18c   | Potentially dependent on media condition - Removed from analysis |
| cbp_c + ORN_c -> citr_c + h_c + pi_c                      | SPAC4G9.10    | Potentially dependent on media condition - Removed from analysis |
| glu_c + imacp_c -> akc_c + hisp_c                         | SPBC11B10.02c | Potentially dependent on media condition - Removed from analysis |
